# Supplementary material for: Glutathione metabolism-related gene signature predicts prognosis and treatment response in low-grade glioma
Source: publisher site journal article supplement (doi:10.18632/aging.205881), 2024-05-30
Supplement: Supplementary file [file aging-v16i11-205881-supplementary-material-SD1.pdf]

SUPPLEMENTARY FIGURES

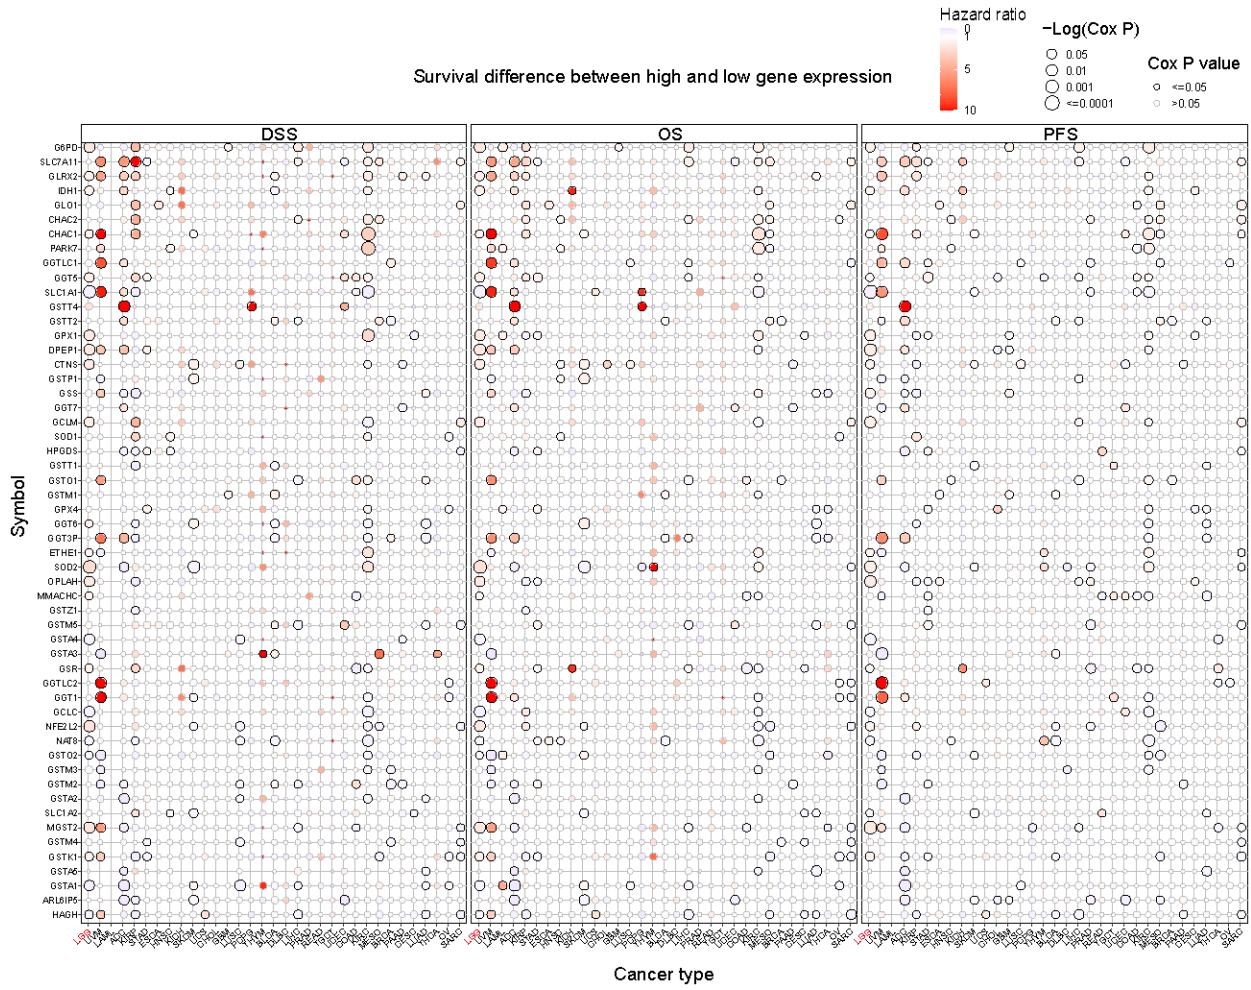

Supplementary Figure 1. Survival analysis of glutathione metabolism genes across 33 cancer types using the GSCA website.

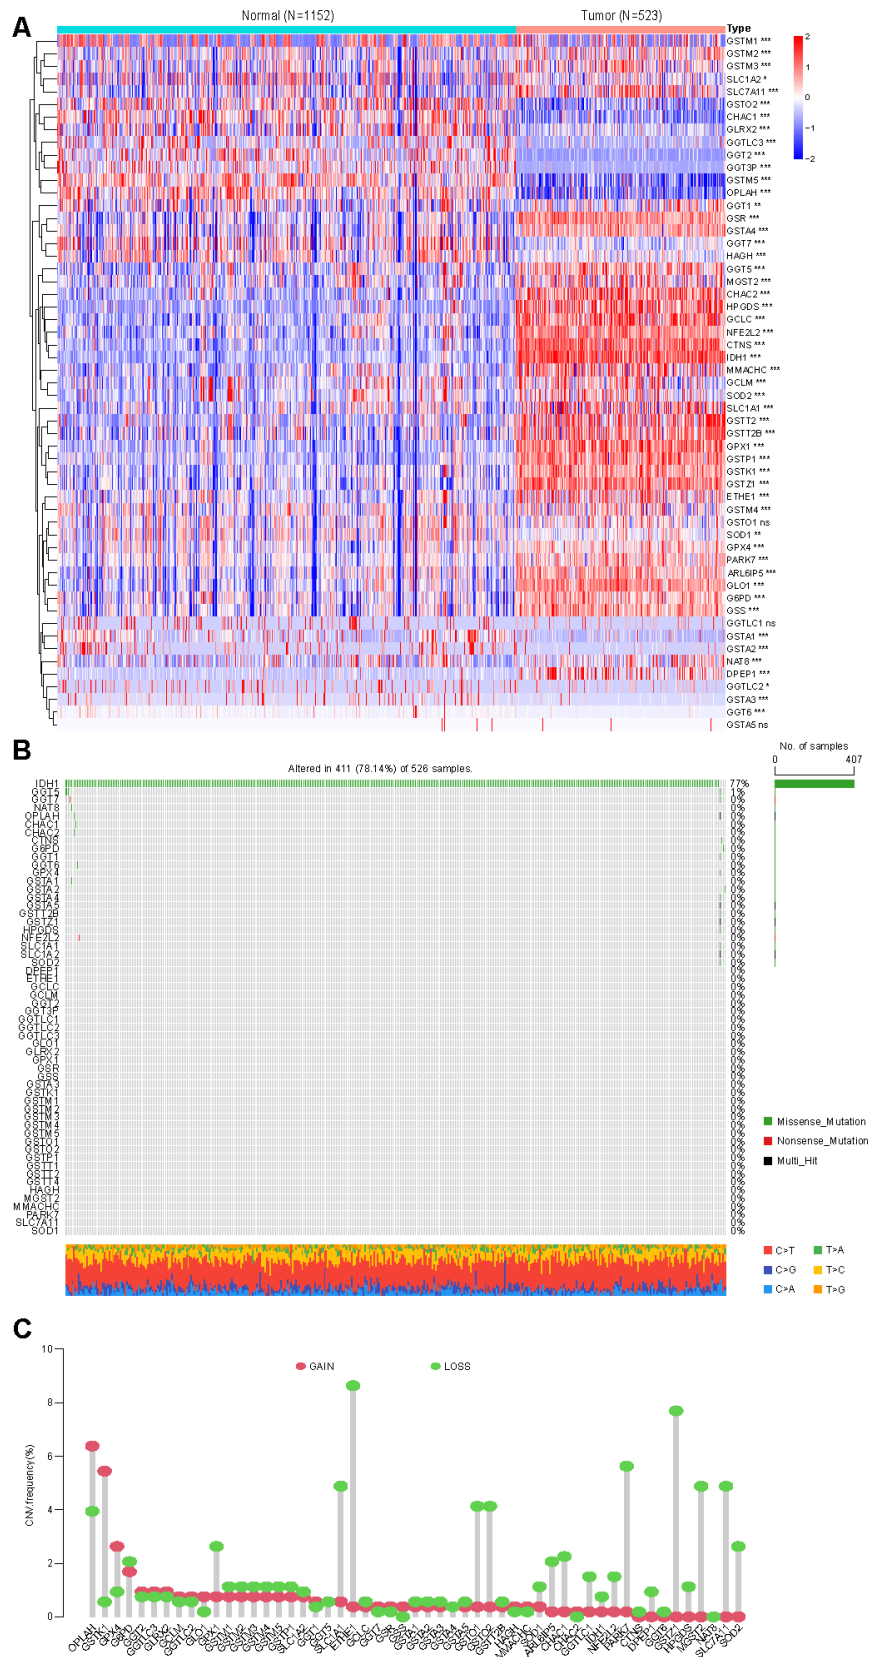

**Supplementary Figure 2. Expression levels and genetic variation landscape of GMRGs.** (A) Comparative expression levels of 56 GMRGs between LGG cancer and normal brain tissues. (B) Mutation frequency of GMRGs in patients from the TCGA-LGG dataset. (C) Copy number variation (CNV) frequency of GMRGs in the TCGA-LGG dataset.

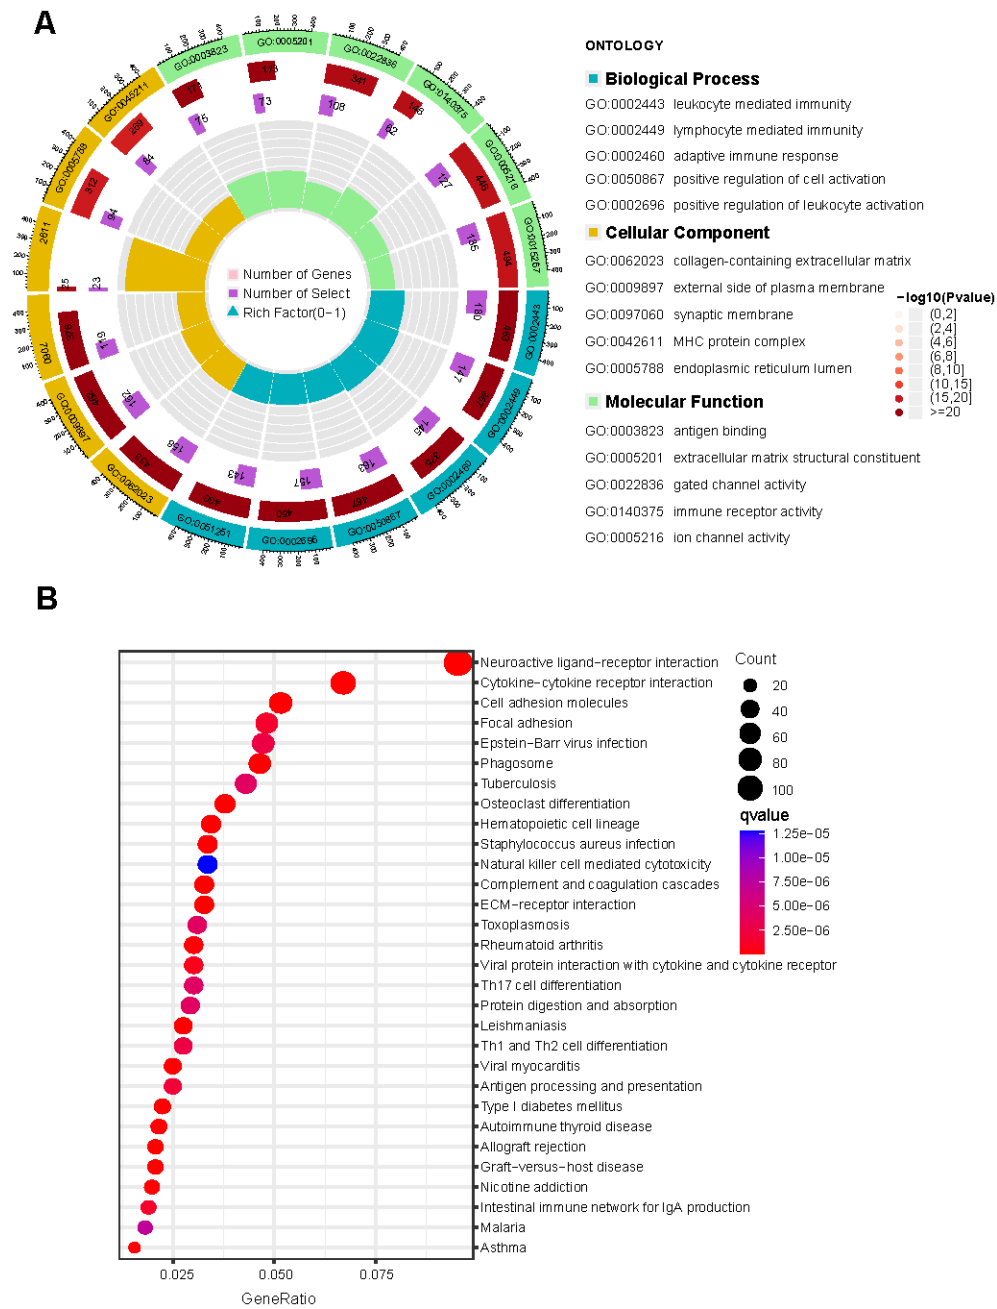

**Supplementary Figure 3. Functional enrichment analysis of GMRGs-related clusters.** (A) Gene Ontology (GO) enrichment analysis based on the Differentially Expressed Genes (DEGs). (B) Kyoto Encyclopedia of Genes and Genomes (KEGG) enrichment analysis based on the DEGs.

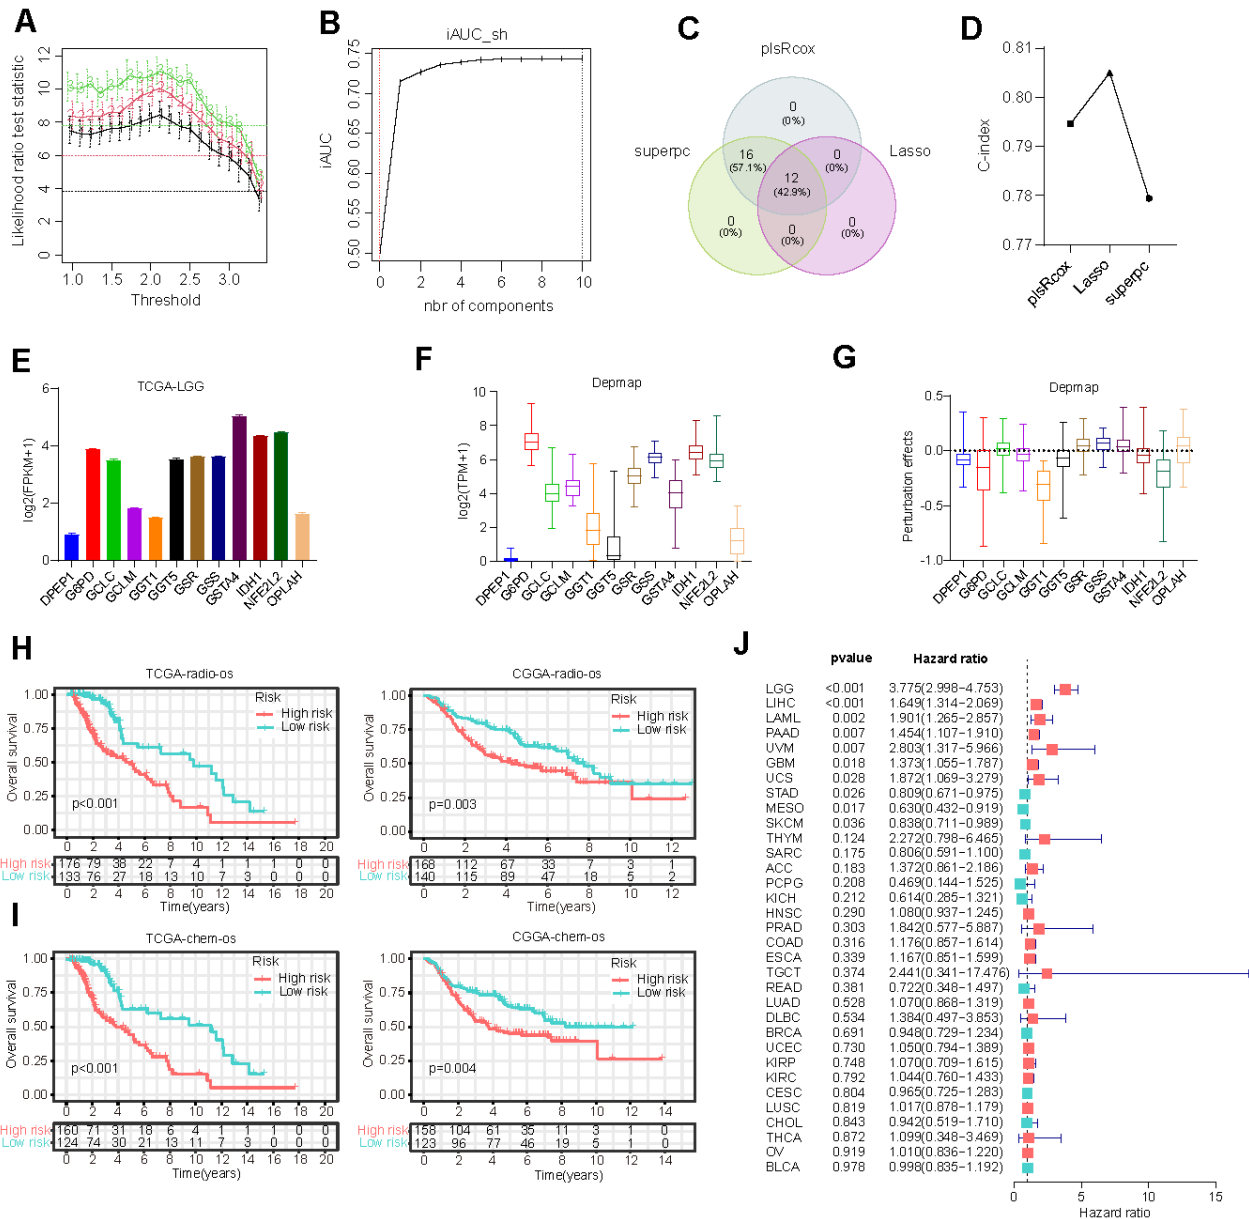

**Supplementary Figure 4. Construction and confirmation of GMRGs-based risk score.** (A) Cross-validation based on the SuperPC model. (B) Cross-validation based on the plsRcox model. (C) The Venn diagram displays the intersection of model genes from the three machine learning algorithms. (D) The C-index of the three machine learning algorithms. (E) Expression levels of model genes in TCGA-LGG dataset (F) Expression levels of model genes in the CNS/brain cell lines in the CCLE database. (G) Gene perturbation effects of model genes in the CNS/brain cell lines in the CCLE database. (H, I) OS curves for patients in high-risk and low-risk groups receiving radiation therapy or chemotherapy in TCGA-LGG or CGGA-LGG datasets. (J) Univariate Cox regression analysis based on the risk score across 33 kinds of cancer types.

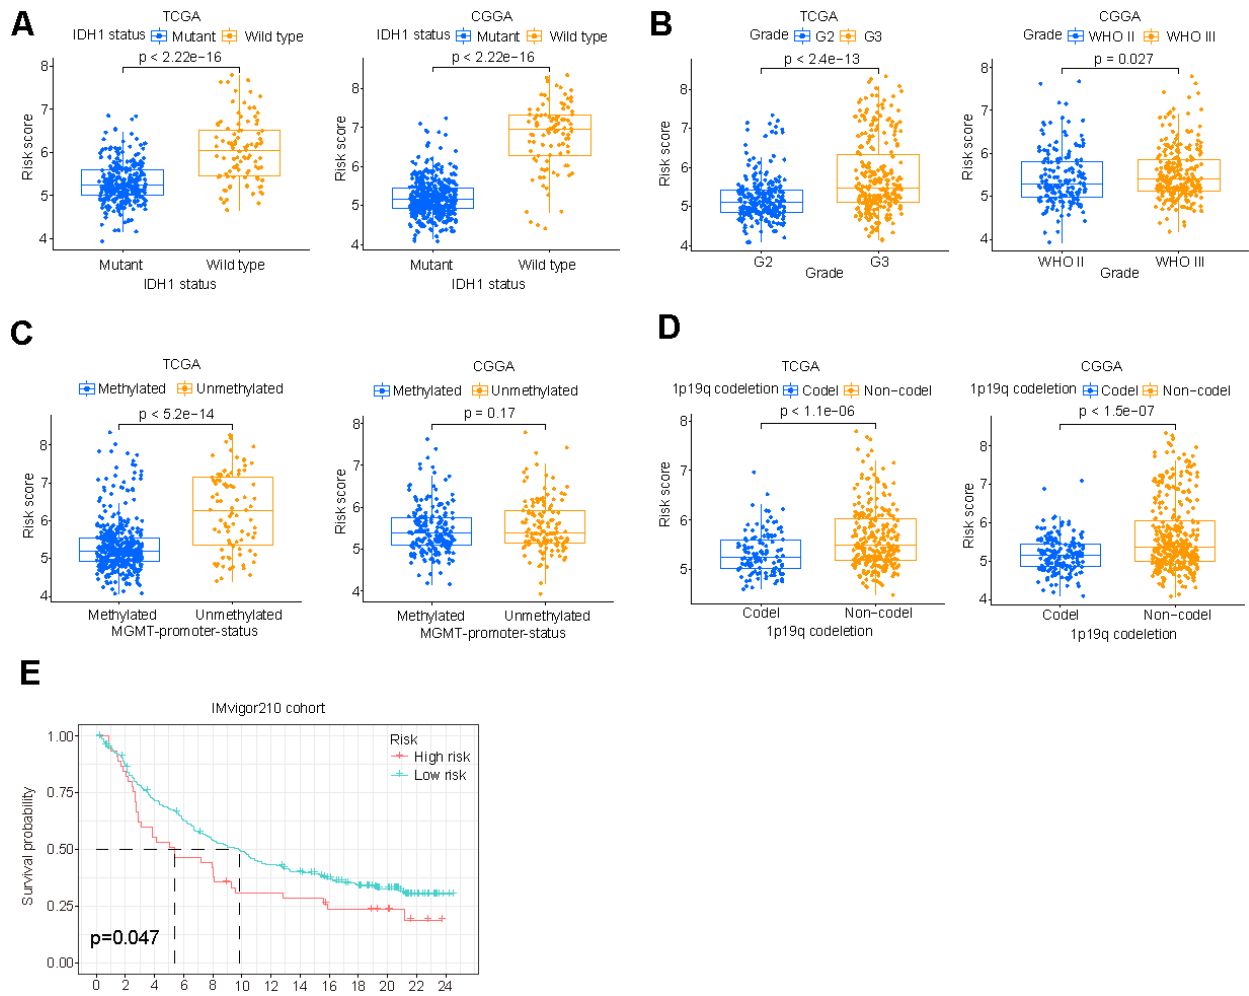

**Supplementary Figure 5. Association of GS with clinical characteristics of LGG.** (A–D) The risk scores are associated with clinical characteristics of IDH1 status (A), Grade (B), MGMT promoter status (C), and 1p19q co-deletion (D) in TCGA-LGG and CGGA-LGG datasets. (E) Survival analysis of the high-risk and low-risk groups in the immunotherapy IMvigor210 cohort.

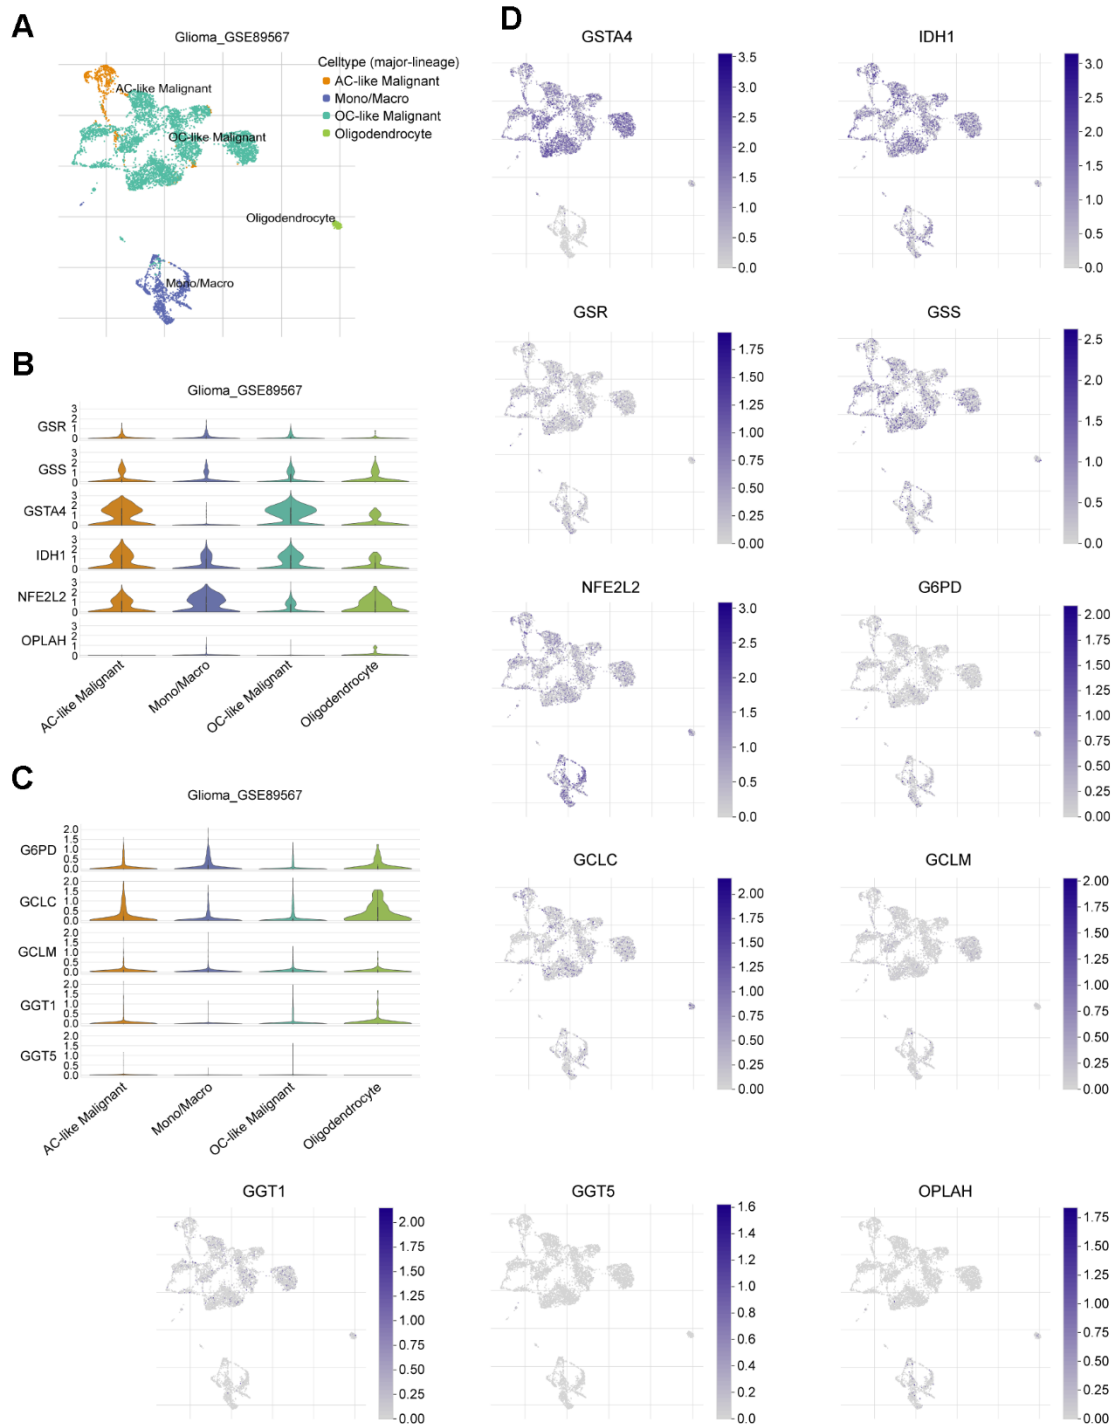

**Supplementary Figure 6. Model gene expression patterns at the single-cell level.** (A) Identification of major cell subtypes in the LGG single-cell dataset Glioma GSE89567. (B, C) Expression patterns of model genes across different cell populations. (D) Expression patterns of model genes in different cell populations.

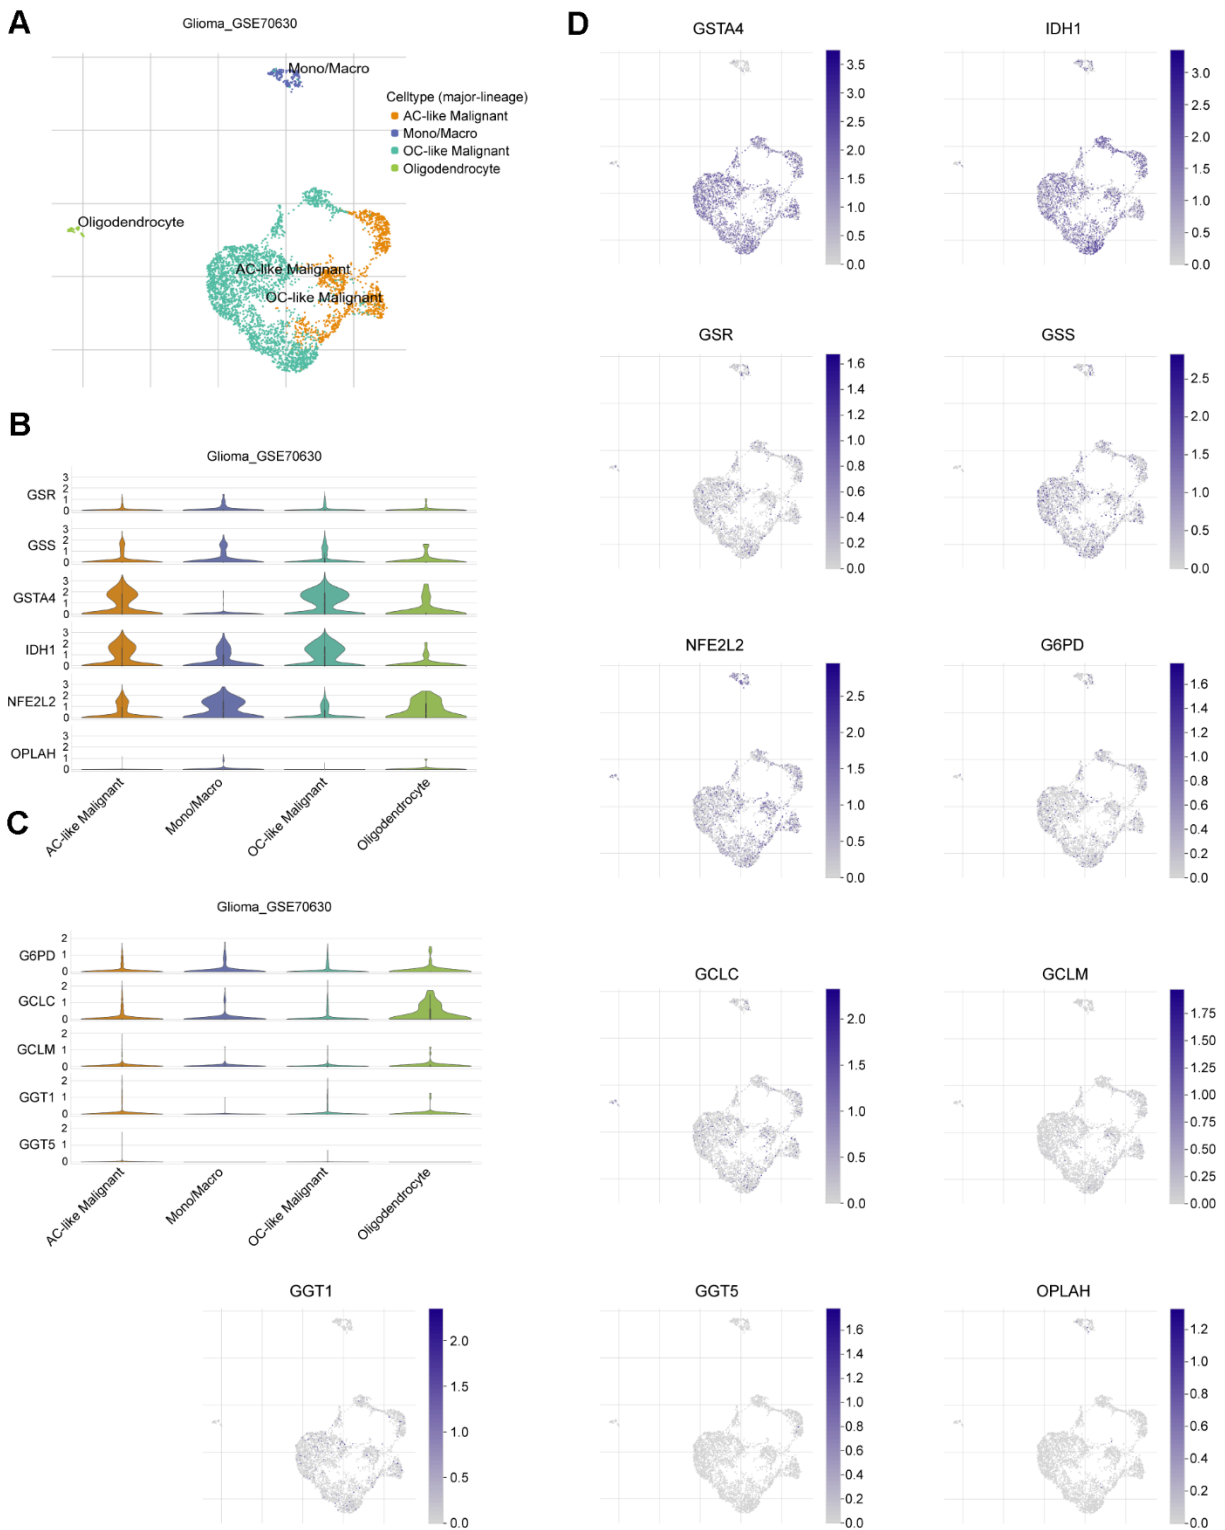

**Supplementary Figure 7. Model gene expression patterns at the single-cell level.** (A) Identification of major cell subtypes in the LGG single-cell dataset Glioma\_GSE70630. (B, C) Expression patterns of model genes across different cell populations. (D) Expression patterns of model genes in different cell populations.

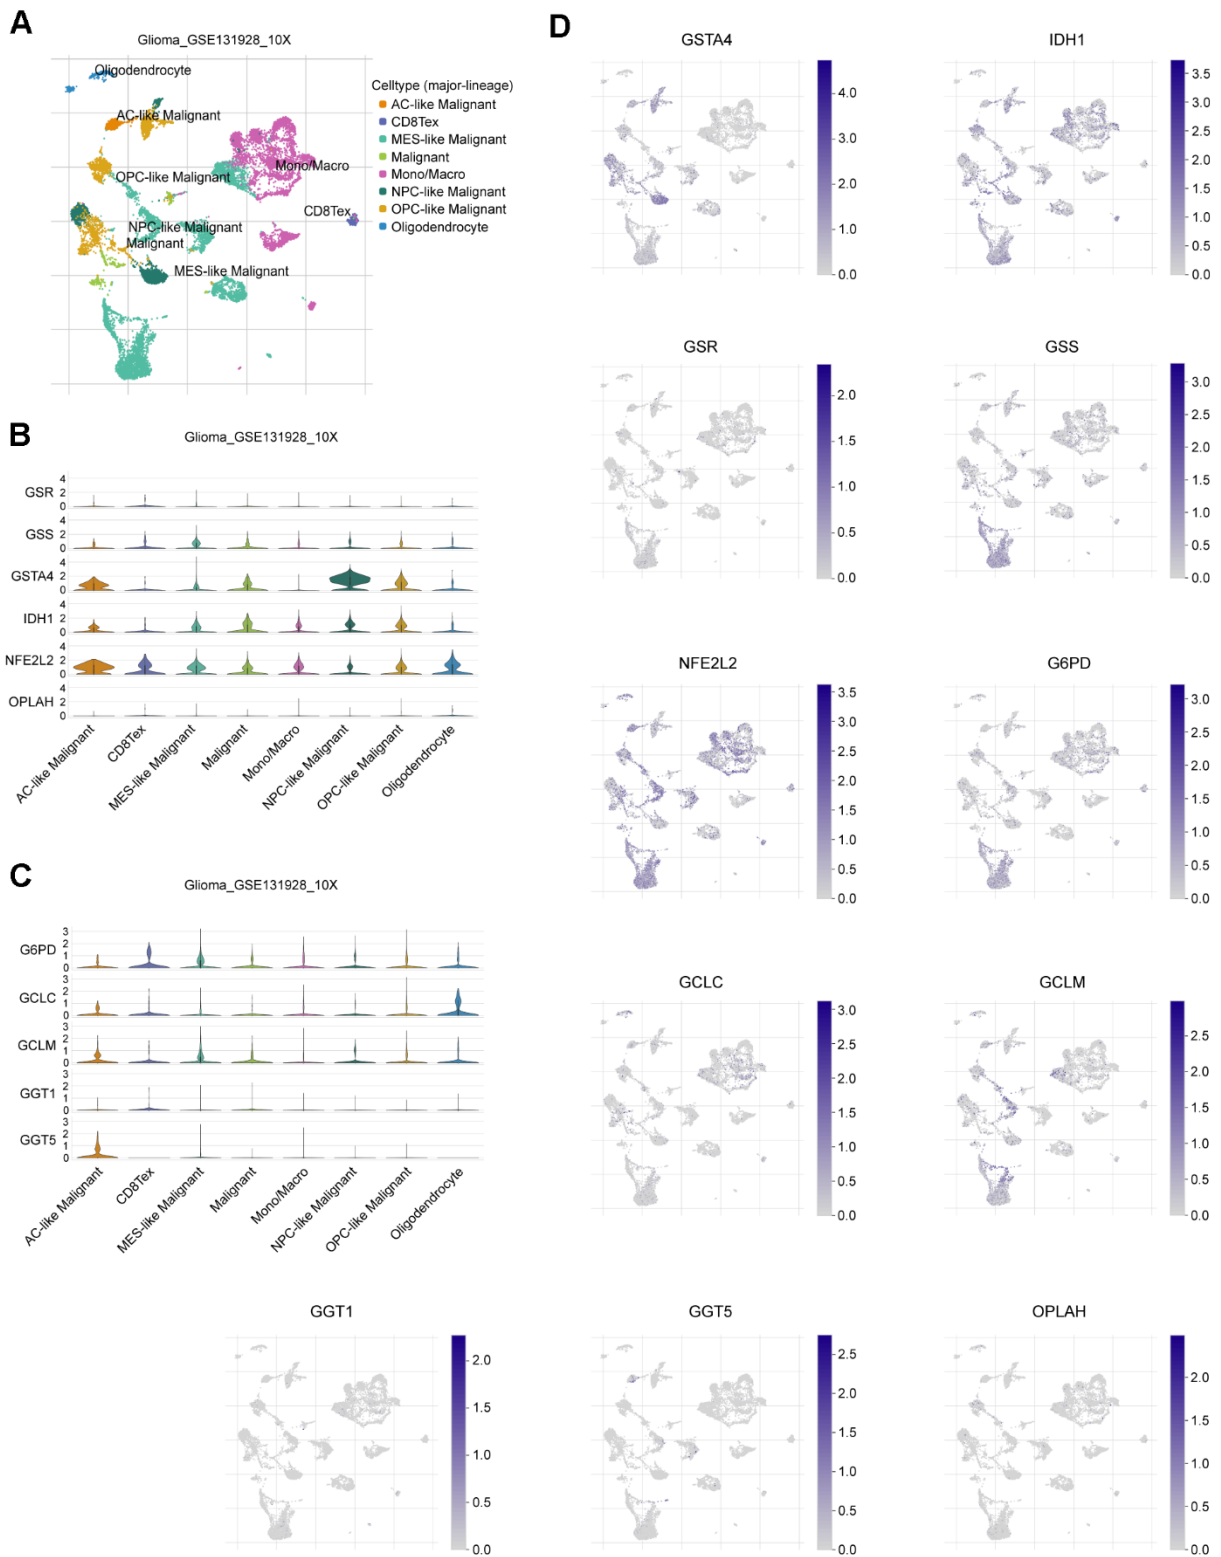

**Supplementary Figure 8. Model gene expression patterns at the single-cell level.** (A) Identification of major cell subtypes in the Glioma\_GSE131928\_10X single-cell dataset. (B, C) Expression patterns of model genes across different cell populations. (D) Expression patterns of model genes in different cell populations.
