# Supplementary material for: Glutathione metabolism-related gene signature predicts prognosis and treatment response in low-grade glioma
Source: Aging (Albany NY). 2024 May 30;16(11):9518–46. doi: 10.18632/aging.205881 (PMC11210255; doi:10.18632/aging.205881)
Supplement: Supplementary Table 1 [file aging-16-205881-s002.xlsx]

## Sheet: Expression&survival
cancertype	symbol	sur_type	hr_categorical(H/L)	coxp_categorical	logrankp	higher_risk_of_death	entrez
ACC	ARL6IP5	OS	0.169707	0.000332059	4.6859e-05	Lower expr.	0
ACC	ARL6IP5	PFS	0.320153	0.000524816	0.000267543	Lower expr.	0
ACC	ARL6IP5	DSS	0.176579	0.000504255	8.7388e-05	Lower expr.	0
ACC	ARL6IP5	DFI	0.572884	0.359745	0.353697	Lower expr.	0
ACC	CHAC1	OS	0.927621	0.842683	0.842566	Lower expr.	0
ACC	CHAC1	PFS	0.958818	0.890702	0.888245	Lower expr.	0
ACC	CHAC1	DSS	0.838546	0.654815	0.654153	Lower expr.	0
ACC	CHAC1	DFI	0.926018	0.899385	0.899361	Lower expr.	0
ACC	CHAC2	OS	1.79429	0.132014	0.127185	Higher expr.	0
ACC	CHAC2	PFS	1.82425	0.0544992	0.0511829	Higher expr.	0
ACC	CHAC2	DSS	1.82451	0.137086	0.131913	Higher expr.	0
ACC	CHAC2	DFI	1.39119	0.585948	0.584254	Higher expr.	0
ACC	CTNS	OS	0.658134	0.275436	0.271811	Lower expr.	0
ACC	CTNS	PFS	0.594487	0.092344	0.0895035	Lower expr.	0
ACC	CTNS	DSS	0.715037	0.395757	0.393413	Lower expr.	0
ACC	CTNS	DFI	0.85665	0.798811	0.798617	Lower expr.	0
ACC	DPEP1	OS	3.3936	0.00523196	0.00303286	Higher expr.	0
ACC	DPEP1	PFS	2.21728	0.0120431	0.0100507	Higher expr.	0
ACC	DPEP1	DSS	3.86008	0.00378503	0.0018365	Higher expr.	0
ACC	DPEP1	DFI	1.32866	0.640373	0.639278	Higher expr.	0
ACC	ETHE1	OS	1.20224	0.631704	0.631116	Higher expr.	0
ACC	ETHE1	PFS	0.868519	0.646165	0.64555	Lower expr.	0
ACC	ETHE1	DSS	1.11002	0.792002	0.791929	Higher expr.	0
ACC	ETHE1	DFI	0.936682	0.914757	0.914742	Lower expr.	0
ACC	G6PD	OS	0.53909	0.118268	0.113063	Lower expr.	0
ACC	G6PD	PFS	0.557504	0.0615178	0.0584801	Lower expr.	0
ACC	G6PD	DSS	0.460396	0.0685039	0.0621507	Lower expr.	0
ACC	G6PD	DFI	0.432259	0.181782	0.16937	Lower expr.	0
ACC	GCLC	OS	0.703371	0.357474	0.356149	Lower expr.	0
ACC	GCLC	PFS	0.766788	0.387355	0.385306	Lower expr.	0
ACC	GCLC	DSS	0.770574	0.50827	0.508718	Lower expr.	0
ACC	GCLC	DFI	1.2417	0.730729	0.730233	Higher expr.	0
ACC	GCLM	OS	1.52211	0.278335	0.274557	Higher expr.	0
ACC	GCLM	PFS	1.07903	0.803418	0.803701	Higher expr.	0
ACC	GCLM	DSS	1.54811	0.279009	0.274912	Higher expr.	0
ACC	GCLM	DFI	0.603498	0.421437	0.416571	Lower expr.	0
ACC	GGT1	OS	2.28944	0.0380659	0.0330945	Higher expr.	0
ACC	GGT1	PFS	2.14169	0.0153523	0.0129887	Higher expr.	0
ACC	GGT1	DSS	2.10795	0.0674704	0.06155	Higher expr.	0
ACC	GGT1	DFI	3.20499	0.0644149	0.0508578	Higher expr.	0
ACC	GGT3P	OS	4.08674	0.0013773	0.00055103	Higher expr.	0
ACC	GGT3P	PFS	3.31644	0.000295626	0.000132059	Higher expr.	0
ACC	GGT3P	DSS	4.43814	0.00149095	0.000536567	Higher expr.	0
ACC	GGT3P	DFI	5.82325	0.0103979	0.0040212	Higher expr.	0
ACC	GGT5	OS	1.73297	0.156919	0.151642	Higher expr.	0
ACC	GGT5	PFS	1.23113	0.499306	0.496102	Higher expr.	0
ACC	GGT5	DSS	1.59371	0.241889	0.237484	Higher expr.	0
ACC	GGT5	DFI	3.5679	0.0638604	0.0488301	Higher expr.	0
ACC	GGT6	OS	0.72928	0.407099	0.405006	Lower expr.	0
ACC	GGT6	PFS	0.586271	0.086565	0.0833725	Lower expr.	0
ACC	GGT6	DSS	0.739679	0.445273	0.443378	Lower expr.	0
ACC	GGT6	DFI	0.868624	0.816841	0.816695	Lower expr.	0
ACC	GGT7	OS	2.34024	0.035978	0.0306806	Higher expr.	0
ACC	GGT7	PFS	2.28508	0.00905126	0.00711811	Higher expr.	0
ACC	GGT7	DSS	2.42103	0.0376934	0.031784	Higher expr.	0
ACC	GGT7	DFI	2.4941	0.145869	0.132441	Higher expr.	0
ACC	GGTLC1	OS	2.45142	0.0186957	0.0152778	Higher expr.	0
ACC	GGTLC1	PFS	2.72159	0.00121992	0.000780841	Higher expr.	0
ACC	GGTLC1	DSS	2.44689	0.0238392	0.0197944	Higher expr.	0
ACC	GGTLC1	DFI	4.37877	0.0164957	0.00905775	Higher expr.	0
ACC	GGTLC2	OS	1.85615	0.11736	0.111484	Higher expr.	0
ACC	GGTLC2	PFS	1.75853	0.068374	0.0644435	Higher expr.	0
ACC	GGTLC2	DSS	1.8858	0.124313	0.117951	Higher expr.	0
ACC	GGTLC2	DFI	3.60902	0.0583856	0.0429757	Higher expr.	0
ACC	GLO1	OS	1.29036	0.513784	0.514269	Higher expr.	0
ACC	GLO1	PFS	1.31461	0.376862	0.375515	Higher expr.	0
ACC	GLO1	DSS	1.37938	0.42833	0.427876	Higher expr.	0
ACC	GLO1	DFI	1.36344	0.613006	0.611682	Higher expr.	0
ACC	GLRX2	OS	3.03025	0.0081392	0.00542286	Higher expr.	0
ACC	GLRX2	PFS	1.37743	0.297664	0.294185	Higher expr.	0
ACC	GLRX2	DSS	3.23132	0.0080814	0.00511516	Higher expr.	0
ACC	GLRX2	DFI	0.448237	0.238161	0.226076	Lower expr.	0
ACC	GPX1	OS	0.602759	0.187851	0.183129	Lower expr.	0
ACC	GPX1	PFS	0.578796	0.0774844	0.0741091	Lower expr.	0
ACC	GPX1	DSS	0.52442	0.112084	0.106015	Lower expr.	0
ACC	GPX1	DFI	1.00796	0.98995	0.98995	Higher expr.	0
ACC	GPX4	OS	0.528674	0.107891	0.101437	Lower expr.	0
ACC	GPX4	PFS	0.611261	0.112029	0.108307	Lower expr.	0
ACC	GPX4	DSS	0.565126	0.158778	0.152245	Lower expr.	0
ACC	GPX4	DFI	1.80491	0.383974	0.37715	Higher expr.	0
ACC	GSR	OS	0.864291	0.70104	0.702557	Lower expr.	0
ACC	GSR	PFS	0.986417	0.964322	0.962168	Lower expr.	0
ACC	GSR	DSS	0.87865	0.742916	0.744686	Lower expr.	0
ACC	GSR	DFI	0.840254	0.774208	0.773934	Lower expr.	0
ACC	GSS	OS	0.459984	0.0514942	0.0460837	Lower expr.	0
ACC	GSS	PFS	0.522218	0.0378232	0.0349692	Lower expr.	0
ACC	GSS	DSS	0.384333	0.026266	0.0212696	Lower expr.	0
ACC	GSS	DFI	0.843454	0.779109	0.778852	Lower expr.	0
ACC	GSTA1	OS	0.12024	2.7694e-05	1.04202e-06	Lower expr.	0
ACC	GSTA1	PFS	0.210921	1.4618e-05	2.77115e-06	Lower expr.	0
ACC	GSTA1	DSS	0.104565	4.7675e-05	1.25385e-06	Lower expr.	0
ACC	GSTA1	DFI	0.164286	0.00557185	0.00191695	Lower expr.	0
ACC	GSTA2	OS	0.192426	0.000379337	7.7711e-05	Lower expr.	0
ACC	GSTA2	PFS	0.29321	0.000222773	9.6698e-05	Lower expr.	0
ACC	GSTA2	DSS	0.17477	0.000487041	8.447e-05	Lower expr.	0
ACC	GSTA2	DFI	0.240446	0.0238091	0.0143095	Lower expr.	0
ACC	GSTA3	OS	0.825638	0.616439	0.615691	Lower expr.	0
ACC	GSTA3	PFS	1.00842	0.978222	0.980512	Higher expr.	0
ACC	GSTA3	DSS	0.858735	0.700445	0.699952	Lower expr.	0
ACC	GSTA3	DFI	1.04749	0.939377	0.939372	Higher expr.	0
ACC	GSTA4	OS	0.943886	0.879031	0.87889	Lower expr.	0
ACC	GSTA4	PFS	1.31039	0.379384	0.379205	Higher expr.	0
ACC	GSTA4	DSS	0.967396	0.932876	0.932766	Lower expr.	0
ACC	GSTA4	DFI	2.92403	0.113514	0.0971442	Higher expr.	0
ACC	GSTA5	OS	0.166488	0.0149553	0.00573703	Lower expr.	0
ACC	GSTA5	PFS	0.201366	0.00256603	0.000897632	Lower expr.	0
ACC	GSTA5	DSS	0.177629	0.01935	0.00849077	Lower expr.	0
ACC	GSTA5	DFI	2.12401e-09	0.997878	0.00409965	Lower expr.	0
ACC	GSTK1	OS	0.553088	0.126902	0.121332	Lower expr.	0
ACC	GSTK1	PFS	0.46718	0.0167904	0.0145657	Lower expr.	0
ACC	GSTK1	DSS	0.602316	0.202758	0.197825	Lower expr.	0
ACC	GSTK1	DFI	0.49373	0.244965	0.235385	Lower expr.	0
ACC	GSTM1	OS	0.730079	0.407547	0.40544	Lower expr.	0
ACC	GSTM1	PFS	0.93239	0.818895	0.821995	Lower expr.	0
ACC	GSTM1	DSS	0.801118	0.572772	0.571892	Lower expr.	0
ACC	GSTM1	DFI	2.08071	0.279941	0.269366	Higher expr.	0
ACC	GSTM2	OS	0.437408	0.0368441	0.0320296	Lower expr.	0
ACC	GSTM2	PFS	0.751511	0.352557	0.351909	Lower expr.	0
ACC	GSTM2	DSS	0.421778	0.0370869	0.0318386	Lower expr.	0
ACC	GSTM2	DFI	1.9104	0.340249	0.331976	Higher expr.	0
ACC	GSTM3	OS	1.17062	0.682593	0.682198	Higher expr.	0
ACC	GSTM3	PFS	1.20255	0.549593	0.547325	Higher expr.	0
ACC	GSTM3	DSS	1.08083	0.844816	0.844827	Higher expr.	0
ACC	GSTM3	DFI	1.21082	0.754016	0.753669	Higher expr.	0
ACC	GSTM4	OS	0.597591	0.179512	0.174682	Lower expr.	0
ACC	GSTM4	PFS	0.870518	0.652213	0.65367	Lower expr.	0
ACC	GSTM4	DSS	0.647991	0.272106	0.26828	Lower expr.	0
ACC	GSTM4	DFI	0.961281	0.94803	0.948027	Lower expr.	0
ACC	GSTM5	OS	1.04016	0.917673	0.91775	Higher expr.	0
ACC	GSTM5	PFS	1.01609	0.958391	0.958591	Higher expr.	0
ACC	GSTM5	DSS	1.07366	0.857294	0.857319	Higher expr.	0
ACC	GSTM5	DFI	1.50659	0.513774	0.510851	Higher expr.	0
ACC	GSTO1	OS	1.30984	0.480272	0.478721	Higher expr.	0
ACC	GSTO1	PFS	1.21	0.533792	0.530901	Higher expr.	0
ACC	GSTO1	DSS	1.19684	0.648441	0.647878	Higher expr.	0
ACC	GSTO1	DFI	1.92255	0.298309	0.289886	Higher expr.	0
ACC	GSTO2	OS	1.22987	0.586006	0.585098	Higher expr.	0
ACC	GSTO2	PFS	0.936121	0.829436	0.831537	Lower expr.	0
ACC	GSTO2	DSS	1.11598	0.780119	0.779889	Higher expr.	0
ACC	GSTO2	DFI	0.47744	0.27595	0.265239	Lower expr.	0
ACC	GSTP1	OS	0.590155	0.181676	0.177279	Lower expr.	0
ACC	GSTP1	PFS	0.501474	0.0294961	0.0264529	Lower expr.	0
ACC	GSTP1	DSS	0.554395	0.152916	0.147594	Lower expr.	0
ACC	GSTP1	DFI	0.747368	0.630762	0.629558	Lower expr.	0
ACC	GSTT1	OS	0.500732	0.0777512	0.072661	Lower expr.	0
ACC	GSTT1	PFS	0.891617	0.709599	0.711456	Lower expr.	0
ACC	GSTT1	DSS	0.540701	0.126338	0.121371	Lower expr.	0
ACC	GSTT1	DFI	3.2692	0.131157	0.110178	Higher expr.	0
ACC	GSTT2	OS	2.27964	0.0384064	0.0336138	Higher expr.	0
ACC	GSTT2	PFS	2.64857	0.00261832	0.00178054	Higher expr.	0
ACC	GSTT2	DSS	2.69148	0.0209212	0.0164762	Higher expr.	0
ACC	GSTT2	DFI	5.28993	0.014149	0.00611506	Higher expr.	0
ACC	GSTT4	OS	11.2791	3.0483e-05	1.39958e-07	Higher expr.	0
ACC	GSTT4	PFS	10.7539	2.714e-05	2.02686e-07	Higher expr.	0
ACC	GSTT4	DSS	12.0654	2.2897e-05	6.18911e-08	Higher expr.	0
ACC	GSTZ1	OS	0.878319	0.73203	0.731776	Lower expr.	0
ACC	GSTZ1	PFS	0.98071	0.949189	0.946922	Lower expr.	0
ACC	GSTZ1	DSS	0.859094	0.699393	0.69902	Lower expr.	0
ACC	GSTZ1	DFI	2.77845	0.131881	0.115868	Higher expr.	0
ACC	HAGH	OS	0.479785	0.0616399	0.0563127	Lower expr.	0
ACC	HAGH	PFS	0.563594	0.0664971	0.0628072	Lower expr.	0
ACC	HAGH	DSS	0.521494	0.10622	0.100454	Lower expr.	0
ACC	HAGH	DFI	1.12011	0.856829	0.856755	Higher expr.	0
ACC	HPGDS	OS	0.355083	0.0113079	0.00830561	Lower expr.	0
ACC	HPGDS	PFS	0.361866	0.00173808	0.00112861	Lower expr.	0
ACC	HPGDS	DSS	0.382939	0.0210725	0.0168703	Lower expr.	0
ACC	HPGDS	DFI	0.320633	0.0620988	0.0494513	Lower expr.	0
ACC	IDH1	OS	2.36926	0.0336431	0.0287032	Higher expr.	0
ACC	IDH1	PFS	2.53925	0.00379338	0.00273464	Higher expr.	0
ACC	IDH1	DSS	2.9119	0.016062	0.0117663	Higher expr.	0
ACC	IDH1	DFI	2.62683	0.12438	0.110491	Higher expr.	0
ACC	MGST2	OS	0.320274	0.00677266	0.00436968	Lower expr.	0
ACC	MGST2	PFS	0.349205	0.0012855	0.000794078	Lower expr.	0
ACC	MGST2	DSS	0.303823	0.0072976	0.00453247	Lower expr.	0
ACC	MGST2	DFI	0.212987	0.0234983	0.0129538	Lower expr.	0
ACC	MMACHC	OS	0.576999	0.160939	0.155018	Lower expr.	0
ACC	MMACHC	PFS	0.90649	0.748117	0.748713	Lower expr.	0
ACC	MMACHC	DSS	0.541972	0.134227	0.12767	Lower expr.	0
ACC	MMACHC	DFI	1.42384	0.573241	0.571255	Higher expr.	0
ACC	NAT8	OS	1.53705	0.267088	0.263155	Higher expr.	0
ACC	NAT8	PFS	1.39919	0.275032	0.273681	Higher expr.	0
ACC	NAT8	DSS	1.41678	0.380628	0.37796	Higher expr.	0
ACC	NAT8	DFI	1.20041	0.763428	0.763112	Higher expr.	0
ACC	NFE2L2	OS	0.910097	0.804176	0.803825	Lower expr.	0
ACC	NFE2L2	PFS	1.08552	0.788352	0.787994	Higher expr.	0
ACC	NFE2L2	DSS	0.883683	0.754047	0.753565	Lower expr.	0
ACC	NFE2L2	DFI	1.02989	0.961301	0.9613	Higher expr.	0
ACC	OPLAH	OS	0.988629	0.97597	0.97577	Lower expr.	0
ACC	OPLAH	PFS	1.03639	0.906882	0.903887	Higher expr.	0
ACC	OPLAH	DSS	0.880552	0.749243	0.748681	Lower expr.	0
ACC	OPLAH	DFI	1.05775	0.9263	0.92629	Higher expr.	0
ACC	PARK7	OS	1.03841	0.920946	0.9209	Higher expr.	0
ACC	PARK7	PFS	0.91499	0.771378	0.768027	Lower expr.	0
ACC	PARK7	DSS	0.948373	0.892723	0.892581	Lower expr.	0
ACC	PARK7	DFI	1.78062	0.357513	0.350875	Higher expr.	0
ACC	SLC1A1	OS	2.35309	0.0350216	0.0300039	Higher expr.	0
ACC	SLC1A1	PFS	1.55913	0.149075	0.146466	Higher expr.	0
ACC	SLC1A1	DSS	2.5837	0.0259474	0.020989	Higher expr.	0
ACC	SLC1A1	DFI	1.02699	0.966134	0.966133	Higher expr.	0
ACC	SLC1A2	OS	0.830396	0.624885	0.624276	Lower expr.	0
ACC	SLC1A2	PFS	0.898847	0.729387	0.726208	Lower expr.	0
ACC	SLC1A2	DSS	0.929691	0.853794	0.853815	Lower expr.	0
ACC	SLC1A2	DFI	0.573025	0.383205	0.377718	Lower expr.	0
ACC	SLC7A11	OS	5.19247	0.000380415	7.7501e-05	Higher expr.	0
ACC	SLC7A11	PFS	3.42478	0.000180557	7.3145e-05	Higher expr.	0
ACC	SLC7A11	DSS	5.82405	0.000434308	7.1274e-05	Higher expr.	0
ACC	SLC7A11	DFI	1.55561	0.481607	0.478071	Higher expr.	0
ACC	SOD1	OS	0.891447	0.762687	0.760283	Lower expr.	0
ACC	SOD1	PFS	0.996453	0.990744	0.990671	Lower expr.	0
ACC	SOD1	DSS	0.916305	0.824567	0.822057	Lower expr.	0
ACC	SOD1	DFI	1.81187	0.3449	0.337986	Higher expr.	0
ACC	SOD2	OS	0.302834	0.00455463	0.00270009	Lower expr.	0
ACC	SOD2	PFS	0.406447	0.00480085	0.00356038	Lower expr.	0
ACC	SOD2	DSS	0.240136	0.00231465	0.000968633	Lower expr.	0
ACC	SOD2	DFI	0.449182	0.18827	0.17693	Lower expr.	0
BLCA	ARL6IP5	OS	0.807312	0.155254	0.154506	Lower expr.	0
BLCA	ARL6IP5	PFS	0.870094	0.293664	0.29277	Lower expr.	0
BLCA	ARL6IP5	DSS	0.701748	0.0559799	0.0546275	Lower expr.	0
BLCA	ARL6IP5	DFI	1.06223	0.868699	0.86868	Higher expr.	0
BLCA	CHAC1	OS	1.28941	0.0919335	0.0908997	Higher expr.	0
BLCA	CHAC1	PFS	1.15138	0.287527	0.286902	Higher expr.	0
BLCA	CHAC1	DSS	1.30685	0.142709	0.141319	Higher expr.	0
BLCA	CHAC1	DFI	0.72779	0.389884	0.387917	Lower expr.	0
BLCA	CHAC2	OS	1.04913	0.749435	0.749812	Higher expr.	0
BLCA	CHAC2	PFS	1.1906	0.189951	0.189386	Higher expr.	0
BLCA	CHAC2	DSS	1.06636	0.724404	0.725158	Higher expr.	0
BLCA	CHAC2	DFI	1.27101	0.5077	0.506702	Higher expr.	0
BLCA	CTNS	OS	1.24436	0.146718	0.145545	Higher expr.	0
BLCA	CTNS	PFS	1.23989	0.105884	0.10535	Higher expr.	0
BLCA	CTNS	DSS	1.22548	0.26566	0.264652	Higher expr.	0
BLCA	CTNS	DFI	0.783516	0.517284	0.516265	Lower expr.	0
BLCA	DPEP1	OS	1.1571	0.333041	0.331781	Higher expr.	0
BLCA	DPEP1	PFS	0.988278	0.928988	0.930296	Lower expr.	0
BLCA	DPEP1	DSS	1.19993	0.317714	0.316803	Higher expr.	0
BLCA	DPEP1	DFI	0.795839	0.531039	0.530155	Lower expr.	0
BLCA	ETHE1	OS	0.941607	0.688802	0.688435	Lower expr.	0
BLCA	ETHE1	PFS	0.888188	0.372185	0.370841	Lower expr.	0
BLCA	ETHE1	DSS	0.955384	0.802029	0.802199	Lower expr.	0
BLCA	ETHE1	DFI	0.98912	0.975741	0.975741	Lower expr.	0
BLCA	G6PD	OS	1.12917	0.419043	0.419305	Higher expr.	0
BLCA	G6PD	PFS	1.21551	0.141333	0.141036	Higher expr.	0
BLCA	G6PD	DSS	1.26831	0.195365	0.194441	Higher expr.	0
BLCA	G6PD	DFI	1.31299	0.450614	0.449245	Higher expr.	0
BLCA	GCLC	OS	0.831809	0.220488	0.219614	Lower expr.	0
BLCA	GCLC	PFS	0.819433	0.133554	0.132749	Lower expr.	0
BLCA	GCLC	DSS	0.826428	0.29592	0.294892	Lower expr.	0
BLCA	GCLC	DFI	0.974826	0.943547	0.943545	Lower expr.	0
BLCA	GCLM	OS	1.23049	0.167887	0.166939	Higher expr.	0
BLCA	GCLM	PFS	1.24654	0.0962268	0.0959199	Higher expr.	0
BLCA	GCLM	DSS	1.23488	0.248116	0.247306	Higher expr.	0
BLCA	GCLM	DFI	1.03975	0.914764	0.914758	Higher expr.	0
BLCA	GGT1	OS	0.857151	0.306049	0.305074	Lower expr.	0
BLCA	GGT1	PFS	0.921321	0.537455	0.536408	Lower expr.	0
BLCA	GGT1	DSS	0.813569	0.258766	0.257617	Lower expr.	0
BLCA	GGT1	DFI	1.1682	0.675312	0.675015	Higher expr.	0
BLCA	GGT3P	OS	0.703036	0.0206924	0.0199977	Lower expr.	0
BLCA	GGT3P	PFS	0.86268	0.265211	0.264742	Lower expr.	0
BLCA	GGT3P	DSS	0.589661	0.00467921	0.00421513	Lower expr.	0
BLCA	GGT3P	DFI	1.04842	0.896722	0.896712	Higher expr.	0
BLCA	GGT5	OS	1.12673	0.427561	0.426441	Higher expr.	0
BLCA	GGT5	PFS	1.07094	0.60538	0.605058	Higher expr.	0
BLCA	GGT5	DSS	1.1083	0.572323	0.571892	Higher expr.	0
BLCA	GGT5	DFI	0.676583	0.291077	0.288079	Lower expr.	0
BLCA	GGT6	OS	0.767071	0.0828112	0.0816887	Lower expr.	0
BLCA	GGT6	PFS	0.814311	0.126307	0.125711	Lower expr.	0
BLCA	GGT6	DSS	0.618563	0.0115038	0.010726	Lower expr.	0
BLCA	GGT6	DFI	1.05949	0.875999	0.875984	Higher expr.	0
BLCA	GGT7	OS	0.965236	0.81461	0.813248	Lower expr.	0
BLCA	GGT7	PFS	0.98923	0.935404	0.936832	Lower expr.	0
BLCA	GGT7	DSS	0.989573	0.954288	0.953684	Lower expr.	0
BLCA	GGT7	DFI	1.45898	0.30278	0.300162	Higher expr.	0
BLCA	GGTLC1	OS	0.788152	0.115632	0.114677	Lower expr.	0
BLCA	GGTLC1	PFS	0.866717	0.282463	0.280895	Lower expr.	0
BLCA	GGTLC1	DSS	0.704752	0.0580503	0.0568401	Lower expr.	0
BLCA	GGTLC1	DFI	0.944006	0.874989	0.874973	Lower expr.	0
BLCA	GGTLC2	OS	0.881494	0.402674	0.40198	Lower expr.	0
BLCA	GGTLC2	PFS	0.883692	0.352976	0.352043	Lower expr.	0
BLCA	GGTLC2	DSS	0.845937	0.360265	0.35958	Lower expr.	0
BLCA	GGTLC2	DFI	0.790367	0.516215	0.51529	Lower expr.	0
BLCA	GLO1	OS	0.909767	0.52961	0.528946	Lower expr.	0
BLCA	GLO1	PFS	0.935601	0.617043	0.615419	Lower expr.	0
BLCA	GLO1	DSS	0.856924	0.397302	0.396559	Lower expr.	0
BLCA	GLO1	DFI	0.898123	0.769609	0.769509	Lower expr.	0
BLCA	GLRX2	OS	1.28841	0.0929049	0.0922722	Higher expr.	0
BLCA	GLRX2	PFS	1.17579	0.221908	0.221172	Higher expr.	0
BLCA	GLRX2	DSS	1.52156	0.0235537	0.0225891	Higher expr.	0
BLCA	GLRX2	DFI	1.26078	0.52174	0.520839	Higher expr.	0
BLCA	GPX1	OS	0.921169	0.586337	0.585511	Lower expr.	0
BLCA	GPX1	PFS	0.843117	0.199933	0.198738	Lower expr.	0
BLCA	GPX1	DSS	0.821958	0.288339	0.287159	Lower expr.	0
BLCA	GPX1	DFI	0.576396	0.136098	0.131268	Lower expr.	0
BLCA	GPX4	OS	0.797144	0.132577	0.131597	Lower expr.	0
BLCA	GPX4	PFS	0.784097	0.067435	0.0668313	Lower expr.	0
BLCA	GPX4	DSS	0.782154	0.178128	0.177085	Lower expr.	0
BLCA	GPX4	DFI	0.816875	0.576528	0.57589	Lower expr.	0
BLCA	GSR	OS	1.07088	0.648767	0.648953	Higher expr.	0
BLCA	GSR	PFS	1.13757	0.332015	0.331839	Higher expr.	0
BLCA	GSR	DSS	1.08787	0.643923	0.644304	Higher expr.	0
BLCA	GSR	DFI	1.33174	0.427937	0.42637	Higher expr.	0
BLCA	GSS	OS	1.11651	0.463679	0.464102	Higher expr.	0
BLCA	GSS	PFS	1.03995	0.767325	0.767192	Higher expr.	0
BLCA	GSS	DSS	1.11767	0.542415	0.542511	Higher expr.	0
BLCA	GSS	DFI	1.0663	0.85943	0.859406	Higher expr.	0
BLCA	GSTA1	OS	0.751078	0.0576707	0.0566908	Lower expr.	0
BLCA	GSTA1	PFS	0.862895	0.266048	0.264991	Lower expr.	0
BLCA	GSTA1	DSS	0.703053	0.0542087	0.0529144	Lower expr.	0
BLCA	GSTA1	DFI	1.64761	0.194214	0.189637	Higher expr.	0
BLCA	GSTA2	OS	0.808825	0.158649	0.157553	Lower expr.	0
BLCA	GSTA2	PFS	0.856943	0.244377	0.24343	Lower expr.	0
BLCA	GSTA2	DSS	0.72557	0.0804072	0.0790821	Lower expr.	0
BLCA	GSTA2	DFI	1.78508	0.131762	0.126443	Higher expr.	0
BLCA	GSTA3	OS	1.39389	0.0624614	0.0613998	Higher expr.	0
BLCA	GSTA3	PFS	1.47573	0.0132123	0.0127168	Higher expr.	0
BLCA	GSTA3	DSS	1.58108	0.0279675	0.026687	Higher expr.	0
BLCA	GSTA3	DFI	1.6689	0.233881	0.22882	Higher expr.	0
BLCA	GSTA4	OS	1.15556	0.337388	0.338242	Higher expr.	0
BLCA	GSTA4	PFS	1.16893	0.239673	0.239235	Higher expr.	0
BLCA	GSTA4	DSS	1.22881	0.259964	0.259402	Higher expr.	0
BLCA	GSTA4	DFI	1.66248	0.170372	0.165932	Higher expr.	0
BLCA	GSTA5	OS	0.998953	0.997835	0.997135	Lower expr.	0
BLCA	GSTA5	PFS	1.17229	0.623372	0.62216	Higher expr.	0
BLCA	GSTA5	DSS	1.04219	0.927964	0.928923	Higher expr.	0
BLCA	GSTA5	DFI	2.48741	0.213558	0.197989	Higher expr.	0
BLCA	GSTK1	OS	0.837292	0.238085	0.23754	Lower expr.	0
BLCA	GSTK1	PFS	0.762565	0.0420075	0.0414383	Lower expr.	0
BLCA	GSTK1	DSS	0.843345	0.350993	0.350486	Lower expr.	0
BLCA	GSTK1	DFI	0.958644	0.906789	0.906782	Lower expr.	0
BLCA	GSTM1	OS	1.42183	0.0200903	0.0194768	Higher expr.	0
BLCA	GSTM1	PFS	1.37038	0.0177914	0.0173189	Higher expr.	0
BLCA	GSTM1	DSS	1.75697	0.00263775	0.00231429	Higher expr.	0
BLCA	GSTM1	DFI	0.790663	0.524524	0.523576	Lower expr.	0
BLCA	GSTM2	OS	1.25582	0.130492	0.13012	Higher expr.	0
BLCA	GSTM2	PFS	1.24879	0.0945927	0.0941643	Higher expr.	0
BLCA	GSTM2	DSS	1.47774	0.0351873	0.034097	Higher expr.	0
BLCA	GSTM2	DFI	0.722072	0.377572	0.375476	Lower expr.	0
BLCA	GSTM3	OS	0.966088	0.818227	0.81768	Lower expr.	0
BLCA	GSTM3	PFS	0.994607	0.967471	0.966781	Lower expr.	0
BLCA	GSTM3	DSS	1.03349	0.856471	0.856415	Higher expr.	0
BLCA	GSTM3	DFI	1.00345	0.992362	0.992362	Higher expr.	0
BLCA	GSTM4	OS	0.837342	0.238015	0.237433	Lower expr.	0
BLCA	GSTM4	PFS	0.930128	0.584814	0.583993	Lower expr.	0
BLCA	GSTM4	DSS	0.828146	0.301397	0.301018	Lower expr.	0
BLCA	GSTM4	DFI	0.616472	0.190512	0.186268	Lower expr.	0
BLCA	GSTM5	OS	1.30555	0.0782435	0.0770187	Higher expr.	0
BLCA	GSTM5	PFS	1.22163	0.131446	0.130386	Higher expr.	0
BLCA	GSTM5	DSS	1.43916	0.0478779	0.0465219	Higher expr.	0
BLCA	GSTM5	DFI	0.825495	0.605429	0.604898	Lower expr.	0
BLCA	GSTO1	OS	0.917761	0.569312	0.569533	Lower expr.	0
BLCA	GSTO1	PFS	0.864276	0.273365	0.273347	Lower expr.	0
BLCA	GSTO1	DSS	0.911681	0.614178	0.614512	Lower expr.	0
BLCA	GSTO1	DFI	0.519894	0.0829937	0.0777686	Lower expr.	0
BLCA	GSTO2	OS	1.19529	0.234678	0.234899	Higher expr.	0
BLCA	GSTO2	PFS	1.10648	0.444285	0.444384	Higher expr.	0
BLCA	GSTO2	DSS	1.20609	0.303566	0.303039	Higher expr.	0
BLCA	GSTO2	DFI	1.41301	0.338752	0.336418	Higher expr.	0
BLCA	GSTP1	OS	0.972174	0.85146	0.849704	Lower expr.	0
BLCA	GSTP1	PFS	0.90667	0.460665	0.460708	Lower expr.	0
BLCA	GSTP1	DSS	1.01528	0.93362	0.933606	Higher expr.	0
BLCA	GSTP1	DFI	0.696274	0.320371	0.317746	Lower expr.	0
BLCA	GSTT1	OS	0.774964	0.0906755	0.0899035	Lower expr.	0
BLCA	GSTT1	PFS	0.813397	0.120314	0.119451	Lower expr.	0
BLCA	GSTT1	DSS	0.645237	0.0175089	0.0166617	Lower expr.	0
BLCA	GSTT1	DFI	0.696501	0.316566	0.313941	Lower expr.	0
BLCA	GSTT2	OS	1.39324	0.0287478	0.0280174	Higher expr.	0
BLCA	GSTT2	PFS	1.38072	0.0159707	0.0155494	Higher expr.	0
BLCA	GSTT2	DSS	1.46885	0.0371971	0.0360728	Higher expr.	0
BLCA	GSTT2	DFI	1.18198	0.645444	0.645075	Higher expr.	0
BLCA	GSTT4	OS	0.476199	0.14275	0.133598	Lower expr.	0
BLCA	GSTT4	PFS	0.541749	0.138913	0.132869	Lower expr.	0
BLCA	GSTT4	DSS	0.640553	0.381604	0.377414	Lower expr.	0
BLCA	GSTT4	DFI	3.77994e-08	0.996649	0.206421	Lower expr.	0
BLCA	GSTZ1	OS	1.12384	0.436761	0.437119	Higher expr.	0
BLCA	GSTZ1	PFS	0.935053	0.612046	0.610636	Lower expr.	0
BLCA	GSTZ1	DSS	1.17455	0.376978	0.376847	Higher expr.	0
BLCA	GSTZ1	DFI	0.957433	0.90378	0.903772	Lower expr.	0
BLCA	HAGH	OS	0.745823	0.0522152	0.0514365	Lower expr.	0
BLCA	HAGH	PFS	0.754222	0.0342551	0.0336906	Lower expr.	0
BLCA	HAGH	DSS	0.767896	0.148291	0.147174	Lower expr.	0
BLCA	HAGH	DFI	1.03841	0.918058	0.918054	Higher expr.	0
BLCA	HPGDS	OS	1.15314	0.347038	0.345777	Higher expr.	0
BLCA	HPGDS	PFS	1.04099	0.762799	0.761557	Higher expr.	0
BLCA	HPGDS	DSS	1.21349	0.291781	0.29075	Higher expr.	0
BLCA	HPGDS	DFI	0.535342	0.0956376	0.0908085	Lower expr.	0
BLCA	IDH1	OS	0.744423	0.0513373	0.0505795	Lower expr.	0
BLCA	IDH1	PFS	0.832041	0.166963	0.166211	Lower expr.	0
BLCA	IDH1	DSS	0.626022	0.0118668	0.0111328	Lower expr.	0
BLCA	IDH1	DFI	0.989202	0.976014	0.976014	Lower expr.	0
BLCA	MGST2	OS	0.805344	0.152869	0.15199	Lower expr.	0
BLCA	MGST2	PFS	0.821217	0.139434	0.139114	Lower expr.	0
BLCA	MGST2	DSS	0.774031	0.162854	0.161952	Lower expr.	0
BLCA	MGST2	DFI	1.00321	0.992966	0.992966	Higher expr.	0
BLCA	MMACHC	OS	1.06047	0.695746	0.696121	Higher expr.	0
BLCA	MMACHC	PFS	1.03628	0.787643	0.787454	Higher expr.	0
BLCA	MMACHC	DSS	1.07548	0.690208	0.689805	Higher expr.	0
BLCA	MMACHC	DFI	0.914232	0.803216	0.803152	Lower expr.	0
BLCA	NAT8	OS	0.626927	0.00215513	0.00195625	Lower expr.	0
BLCA	NAT8	PFS	0.61946	0.000354692	0.000309459	Lower expr.	0
BLCA	NAT8	DSS	0.555242	0.0015644	0.00133743	Lower expr.	0
BLCA	NAT8	DFI	0.514408	0.0689869	0.0641296	Lower expr.	0
BLCA	NFE2L2	OS	0.789702	0.116051	0.115264	Lower expr.	0
BLCA	NFE2L2	PFS	0.739942	0.0236145	0.0231036	Lower expr.	0
BLCA	NFE2L2	DSS	0.804321	0.231587	0.230678	Lower expr.	0
BLCA	NFE2L2	DFI	0.669276	0.266599	0.263499	Lower expr.	0
BLCA	OPLAH	OS	1.23763	0.156799	0.156424	Higher expr.	0
BLCA	OPLAH	PFS	1.27515	0.0684294	0.0679166	Higher expr.	0
BLCA	OPLAH	DSS	1.20521	0.306298	0.30568	Higher expr.	0
BLCA	OPLAH	DFI	0.901639	0.776642	0.776546	Lower expr.	0
BLCA	PARK7	OS	0.949553	0.730739	0.730302	Lower expr.	0
BLCA	PARK7	PFS	0.983115	0.897904	0.896655	Lower expr.	0
BLCA	PARK7	DSS	0.87422	0.4623	0.461932	Lower expr.	0
BLCA	PARK7	DFI	0.786557	0.509481	0.508514	Lower expr.	0
BLCA	SLC1A1	OS	0.886777	0.424298	0.424155	Lower expr.	0
BLCA	SLC1A1	PFS	0.840862	0.191449	0.19072	Lower expr.	0
BLCA	SLC1A1	DSS	0.754489	0.126961	0.125798	Lower expr.	0
BLCA	SLC1A1	DFI	0.838176	0.627832	0.627399	Lower expr.	0
BLCA	SLC1A2	OS	1.08155	0.601392	0.601682	Higher expr.	0
BLCA	SLC1A2	PFS	1.0954	0.490966	0.490651	Higher expr.	0
BLCA	SLC1A2	DSS	1.02413	0.895817	0.89525	Higher expr.	0
BLCA	SLC1A2	DFI	1.19653	0.618494	0.61803	Higher expr.	0
BLCA	SLC7A11	OS	1.20278	0.219151	0.219203	Higher expr.	0
BLCA	SLC7A11	PFS	1.17672	0.218961	0.219032	Higher expr.	0
BLCA	SLC7A11	DSS	1.24373	0.231568	0.230965	Higher expr.	0
BLCA	SLC7A11	DFI	1.40588	0.345898	0.343588	Higher expr.	0
BLCA	SOD1	OS	0.837223	0.238149	0.23695	Lower expr.	0
BLCA	SOD1	PFS	0.900135	0.426751	0.426403	Lower expr.	0
BLCA	SOD1	DSS	0.919752	0.645837	0.645763	Lower expr.	0
BLCA	SOD1	DFI	0.889737	0.74602	0.745883	Lower expr.	0
BLCA	SOD2	OS	0.881503	0.401782	0.402022	Lower expr.	0
BLCA	SOD2	PFS	0.907388	0.463793	0.464383	Lower expr.	0
BLCA	SOD2	DSS	0.86109	0.41278	0.413039	Lower expr.	0
BLCA	SOD2	DFI	0.732639	0.390282	0.388453	Lower expr.	0
BRCA	ARL6IP5	OS	0.882463	0.441422	0.441515	Lower expr.	0
BRCA	ARL6IP5	PFS	0.839674	0.211158	0.2107	Lower expr.	0
BRCA	ARL6IP5	DSS	0.817697	0.355467	0.354801	Lower expr.	0
BRCA	ARL6IP5	DFI	0.734478	0.160159	0.158527	Lower expr.	0
BRCA	CHAC1	OS	1.12357	0.470819	0.469366	Higher expr.	0
BRCA	CHAC1	PFS	1.22654	0.142808	0.141622	Higher expr.	0
BRCA	CHAC1	DSS	1.3369	0.184729	0.181878	Higher expr.	0
BRCA	CHAC1	DFI	2.00778	0.00260677	0.0021272	Higher expr.	0
BRCA	CHAC2	OS	0.95305	0.766062	0.765638	Lower expr.	0
BRCA	CHAC2	PFS	0.887101	0.391043	0.390455	Lower expr.	0
BRCA	CHAC2	DSS	1.04837	0.827987	0.826844	Higher expr.	0
BRCA	CHAC2	DFI	1.12722	0.584584	0.584361	Higher expr.	0
BRCA	CTNS	OS	1.03366	0.838448	0.839902	Higher expr.	0
BRCA	CTNS	PFS	1.03571	0.801763	0.803297	Higher expr.	0
BRCA	CTNS	DSS	1.17549	0.457862	0.459437	Higher expr.	0
BRCA	CTNS	DFI	1.08018	0.724103	0.724038	Higher expr.	0
BRCA	DPEP1	OS	0.774241	0.121289	0.120084	Lower expr.	0
BRCA	DPEP1	PFS	0.846606	0.236028	0.235241	Lower expr.	0
BRCA	DPEP1	DSS	0.796821	0.300575	0.298922	Lower expr.	0
BRCA	DPEP1	DFI	0.857182	0.482221	0.481788	Lower expr.	0
BRCA	ETHE1	OS	1.05209	0.753198	0.754846	Higher expr.	0
BRCA	ETHE1	PFS	1.05696	0.690765	0.692518	Higher expr.	0
BRCA	ETHE1	DSS	1.23885	0.325853	0.326084	Higher expr.	0
BRCA	ETHE1	DFI	1.10542	0.646537	0.6464	Higher expr.	0
BRCA	G6PD	OS	1.22708	0.206571	0.206399	Higher expr.	0
BRCA	G6PD	PFS	1.13083	0.378108	0.379102	Higher expr.	0
BRCA	G6PD	DSS	1.29603	0.2345	0.233876	Higher expr.	0
BRCA	G6PD	DFI	1.15028	0.521867	0.52153	Higher expr.	0
BRCA	GCLC	OS	1.01268	0.93773	0.937194	Higher expr.	0
BRCA	GCLC	PFS	0.931059	0.607896	0.608261	Lower expr.	0
BRCA	GCLC	DSS	0.797903	0.304088	0.302989	Lower expr.	0
BRCA	GCLC	DFI	0.641644	0.0484477	0.0466374	Lower expr.	0
BRCA	GCLM	OS	1.15099	0.386835	0.387123	Higher expr.	0
BRCA	GCLM	PFS	1.22355	0.150624	0.150213	Higher expr.	0
BRCA	GCLM	DSS	1.0675	0.763942	0.764319	Higher expr.	0
BRCA	GCLM	DFI	1.39885	0.131429	0.129636	Higher expr.	0
BRCA	GGT1	OS	1.08089	0.630731	0.629865	Higher expr.	0
BRCA	GGT1	PFS	1.19804	0.195178	0.194076	Higher expr.	0
BRCA	GGT1	DSS	1.5295	0.0551228	0.053241	Higher expr.	0
BRCA	GGT1	DFI	1.65465	0.0242814	0.0228202	Higher expr.	0
BRCA	GGT3P	OS	1.10118	0.55109	0.550861	Higher expr.	0
BRCA	GGT3P	PFS	1.20083	0.18931	0.188504	Higher expr.	0
BRCA	GGT3P	DSS	1.61966	0.0303907	0.0287874	Higher expr.	0
BRCA	GGT3P	DFI	1.70987	0.0170226	0.0157422	Higher expr.	0
BRCA	GGT5	OS	0.814505	0.207142	0.206021	Lower expr.	0
BRCA	GGT5	PFS	0.774526	0.0687288	0.0678468	Lower expr.	0
BRCA	GGT5	DSS	0.825307	0.379035	0.377652	Lower expr.	0
BRCA	GGT5	DFI	0.852052	0.464784	0.46431	Lower expr.	0
BRCA	GGT6	OS	1.00851	0.958158	0.957095	Higher expr.	0
BRCA	GGT6	PFS	0.900704	0.454856	0.455508	Lower expr.	0
BRCA	GGT6	DSS	1.00759	0.972267	0.969686	Higher expr.	0
BRCA	GGT6	DFI	0.681771	0.0866365	0.0847325	Lower expr.	0
BRCA	GGT7	OS	0.80583	0.187832	0.186435	Lower expr.	0
BRCA	GGT7	PFS	0.86564	0.302909	0.301805	Lower expr.	0
BRCA	GGT7	DSS	0.710008	0.122452	0.119814	Lower expr.	0
BRCA	GGT7	DFI	0.767111	0.22959	0.228235	Lower expr.	0
BRCA	GGTLC1	OS	1.24049	0.183188	0.182231	Higher expr.	0
BRCA	GGTLC1	PFS	1.1652	0.273229	0.272611	Higher expr.	0
BRCA	GGTLC1	DSS	1.78316	0.00955674	0.00859093	Higher expr.	0
BRCA	GGTLC1	DFI	1.47536	0.0773337	0.0755017	Higher expr.	0
BRCA	GGTLC2	OS	1.13698	0.427757	0.42682	Higher expr.	0
BRCA	GGTLC2	PFS	1.14987	0.316387	0.315391	Higher expr.	0
BRCA	GGTLC2	DSS	1.52274	0.0565835	0.0547481	Higher expr.	0
BRCA	GGTLC2	DFI	1.67312	0.021308	0.019918	Higher expr.	0
BRCA	GLO1	OS	1.01061	0.947851	0.946659	Higher expr.	0
BRCA	GLO1	PFS	1.07422	0.607351	0.60643	Higher expr.	0
BRCA	GLO1	DSS	0.750633	0.191504	0.190825	Lower expr.	0
BRCA	GLO1	DFI	1.0662	0.769324	0.769286	Higher expr.	0
BRCA	GLRX2	OS	1.14258	0.410818	0.409921	Higher expr.	0
BRCA	GLRX2	PFS	1.07726	0.593449	0.592908	Higher expr.	0
BRCA	GLRX2	DSS	1.45199	0.0900712	0.0879642	Higher expr.	0
BRCA	GLRX2	DFI	1.09319	0.683345	0.683247	Higher expr.	0
BRCA	GPX1	OS	0.873342	0.402646	0.402767	Lower expr.	0
BRCA	GPX1	PFS	0.886417	0.387989	0.388106	Lower expr.	0
BRCA	GPX1	DSS	1.07214	0.749765	0.749077	Higher expr.	0
BRCA	GPX1	DFI	1.18575	0.438726	0.438176	Higher expr.	0
BRCA	GPX4	OS	0.848263	0.311	0.310806	Lower expr.	0
BRCA	GPX4	PFS	0.966901	0.809624	0.810013	Lower expr.	0
BRCA	GPX4	DSS	0.983848	0.940531	0.941697	Lower expr.	0
BRCA	GPX4	DFI	1.24377	0.322638	0.321681	Higher expr.	0
BRCA	GSR	OS	1.22507	0.210417	0.209307	Higher expr.	0
BRCA	GSR	PFS	1.15994	0.288628	0.287781	Higher expr.	0
BRCA	GSR	DSS	1.17993	0.447836	0.446402	Higher expr.	0
BRCA	GSR	DFI	0.88977	0.594346	0.594137	Lower expr.	0
BRCA	GSS	OS	0.926178	0.635227	0.635409	Lower expr.	0
BRCA	GSS	PFS	0.979158	0.879843	0.880065	Lower expr.	0
BRCA	GSS	DSS	0.870122	0.522936	0.522658	Lower expr.	0
BRCA	GSS	DFI	0.922933	0.714062	0.713989	Lower expr.	0
BRCA	GSTA1	OS	0.77283	0.110679	0.109603	Lower expr.	0
BRCA	GSTA1	PFS	0.83099	0.1835	0.18272	Lower expr.	0
BRCA	GSTA1	DSS	0.976182	0.912139	0.912099	Lower expr.	0
BRCA	GSTA1	DFI	1.24471	0.325206	0.324245	Higher expr.	0
BRCA	GSTA2	OS	1.19873	0.266401	0.266427	Higher expr.	0
BRCA	GSTA2	PFS	1.14394	0.33758	0.337968	Higher expr.	0
BRCA	GSTA2	DSS	1.45188	0.0943419	0.0928296	Higher expr.	0
BRCA	GSTA2	DFI	1.13676	0.559287	0.559021	Higher expr.	0
BRCA	GSTA3	OS	0.928339	0.649592	0.649683	Lower expr.	0
BRCA	GSTA3	PFS	1.03644	0.799015	0.798628	Higher expr.	0
BRCA	GSTA3	DSS	0.902725	0.643287	0.643404	Lower expr.	0
BRCA	GSTA3	DFI	1.17841	0.453445	0.452944	Higher expr.	0
BRCA	GSTA4	OS	1.32823	0.0814051	0.0800886	Higher expr.	0
BRCA	GSTA4	PFS	1.31554	0.0505755	0.0496526	Higher expr.	0
BRCA	GSTA4	DSS	1.46094	0.0855358	0.0831704	Higher expr.	0
BRCA	GSTA4	DFI	1.69455	0.0197078	0.0183274	Higher expr.	0
BRCA	GSTA5	OS	0.947985	0.768158	0.768776	Lower expr.	0
BRCA	GSTA5	PFS	1.01735	0.911159	0.910636	Higher expr.	0
BRCA	GSTA5	DSS	0.874427	0.594245	0.595445	Lower expr.	0
BRCA	GSTA5	DFI	0.864676	0.564299	0.563958	Lower expr.	0
BRCA	GSTK1	OS	0.763644	0.0964923	0.0953482	Lower expr.	0
BRCA	GSTK1	PFS	0.815626	0.143845	0.142806	Lower expr.	0
BRCA	GSTK1	DSS	0.736359	0.160816	0.158685	Lower expr.	0
BRCA	GSTK1	DFI	0.917204	0.692185	0.692094	Lower expr.	0
BRCA	GSTM1	OS	0.868037	0.381476	0.38201	Lower expr.	0
BRCA	GSTM1	PFS	0.901561	0.456468	0.457453	Lower expr.	0
BRCA	GSTM1	DSS	0.69512	0.0990574	0.0977044	Lower expr.	0
BRCA	GSTM1	DFI	0.917965	0.695249	0.695162	Lower expr.	0
BRCA	GSTM2	OS	0.727523	0.0512419	0.0503763	Lower expr.	0
BRCA	GSTM2	PFS	0.839641	0.210316	0.210149	Lower expr.	0
BRCA	GSTM2	DSS	0.474768	0.00125632	0.000969046	Lower expr.	0
BRCA	GSTM2	DFI	0.674216	0.0749572	0.0730914	Lower expr.	0
BRCA	GSTM3	OS	0.767477	0.10549	0.104597	Lower expr.	0
BRCA	GSTM3	PFS	0.816465	0.148469	0.148006	Lower expr.	0
BRCA	GSTM3	DSS	0.577484	0.0149823	0.0137894	Lower expr.	0
BRCA	GSTM3	DFI	0.580421	0.0161588	0.0148905	Lower expr.	0
BRCA	GSTM4	OS	0.666858	0.013103	0.0125533	Lower expr.	0
BRCA	GSTM4	PFS	0.76021	0.0501794	0.0496685	Lower expr.	0
BRCA	GSTM4	DSS	0.579797	0.0143751	0.0133114	Lower expr.	0
BRCA	GSTM4	DFI	0.717294	0.131054	0.129301	Lower expr.	0
BRCA	GSTM5	OS	0.923212	0.62046	0.621013	Lower expr.	0
BRCA	GSTM5	PFS	0.900356	0.450928	0.451393	Lower expr.	0
BRCA	GSTM5	DSS	0.950645	0.816016	0.817139	Lower expr.	0
BRCA	GSTM5	DFI	0.897799	0.621905	0.621738	Lower expr.	0
BRCA	GSTO1	OS	0.661413	0.0117343	0.0111856	Lower expr.	0
BRCA	GSTO1	PFS	0.661174	0.0034489	0.00323743	Lower expr.	0
BRCA	GSTO1	DSS	0.733758	0.157501	0.155831	Lower expr.	0
BRCA	GSTO1	DFI	0.858925	0.487005	0.486591	Lower expr.	0
BRCA	GSTO2	OS	0.841779	0.288694	0.28804	Lower expr.	0
BRCA	GSTO2	PFS	0.851865	0.252661	0.252028	Lower expr.	0
BRCA	GSTO2	DSS	0.692844	0.0957655	0.0936223	Lower expr.	0
BRCA	GSTO2	DFI	0.755762	0.20458	0.203112	Lower expr.	0
BRCA	GSTP1	OS	1.01134	0.944403	0.943917	Higher expr.	0
BRCA	GSTP1	PFS	1.07901	0.585456	0.585018	Higher expr.	0
BRCA	GSTP1	DSS	1.17271	0.466198	0.463987	Higher expr.	0
BRCA	GSTP1	DFI	1.48912	0.0765973	0.0746768	Higher expr.	0
BRCA	GSTT1	OS	1.06407	0.702328	0.702816	Higher expr.	0
BRCA	GSTT1	PFS	1.05996	0.677644	0.678263	Higher expr.	0
BRCA	GSTT1	DSS	0.953265	0.825868	0.82548	Lower expr.	0
BRCA	GSTT1	DFI	0.91307	0.67762	0.677516	Lower expr.	0
BRCA	GSTT2	OS	0.645311	0.0094003	0.00890361	Lower expr.	0
BRCA	GSTT2	PFS	0.669516	0.00537858	0.00510804	Lower expr.	0
BRCA	GSTT2	DSS	0.500563	0.0033566	0.00279398	Lower expr.	0
BRCA	GSTT2	DFI	0.79934	0.308557	0.307551	Lower expr.	0
BRCA	GSTT4	OS	0.723373	0.523001	0.521496	Lower expr.	0
BRCA	GSTT4	PFS	0.67844	0.391702	0.388835	Lower expr.	0
BRCA	GSTT4	DSS	0.634072	0.524607	0.521343	Lower expr.	0
BRCA	GSTT4	DFI	0.275518	0.200132	0.170149	Lower expr.	0
BRCA	GSTZ1	OS	0.774408	0.115793	0.114582	Lower expr.	0
BRCA	GSTZ1	PFS	0.862882	0.290573	0.289606	Lower expr.	0
BRCA	GSTZ1	DSS	0.974492	0.905658	0.903783	Lower expr.	0
BRCA	GSTZ1	DFI	0.839693	0.425655	0.425068	Lower expr.	0
BRCA	HAGH	OS	1.15509	0.37203	0.371953	Higher expr.	0
BRCA	HAGH	PFS	1.07828	0.588973	0.589559	Higher expr.	0
BRCA	HAGH	DSS	1.09684	0.670696	0.670568	Higher expr.	0
BRCA	HAGH	DFI	1.06024	0.789447	0.789418	Higher expr.	0
BRCA	HPGDS	OS	0.945805	0.731679	0.732012	Lower expr.	0
BRCA	HPGDS	PFS	0.993498	0.962964	0.963415	Lower expr.	0
BRCA	HPGDS	DSS	0.914826	0.683182	0.683673	Lower expr.	0
BRCA	HPGDS	DFI	0.992199	0.971408	0.971408	Lower expr.	0
BRCA	IDH1	OS	1.08712	0.605152	0.604644	Higher expr.	0
BRCA	IDH1	PFS	1.01739	0.901632	0.900914	Higher expr.	0
BRCA	IDH1	DSS	1.10731	0.638834	0.637335	Higher expr.	0
BRCA	IDH1	DFI	0.740629	0.175424	0.173819	Lower expr.	0
BRCA	MGST2	OS	1.03263	0.842605	0.841617	Higher expr.	0
BRCA	MGST2	PFS	1.06358	0.658907	0.657959	Higher expr.	0
BRCA	MGST2	DSS	0.983987	0.940748	0.941657	Lower expr.	0
BRCA	MGST2	DFI	1.22448	0.355739	0.354918	Higher expr.	0
BRCA	MMACHC	OS	1.0672	0.687107	0.685502	Higher expr.	0
BRCA	MMACHC	PFS	1.20161	0.18864	0.187256	Higher expr.	0
BRCA	MMACHC	DSS	0.960574	0.853259	0.855785	Lower expr.	0
BRCA	MMACHC	DFI	1.1624	0.491118	0.49071	Higher expr.	0
BRCA	NAT8	OS	0.864069	0.367236	0.365303	Lower expr.	0
BRCA	NAT8	PFS	0.776244	0.0703036	0.0690865	Lower expr.	0
BRCA	NAT8	DSS	0.716288	0.1314	0.128597	Lower expr.	0
BRCA	NAT8	DFI	0.558098	0.010443	0.00939828	Lower expr.	0
BRCA	NFE2L2	OS	0.923927	0.625231	0.624954	Lower expr.	0
BRCA	NFE2L2	PFS	0.916128	0.530672	0.530461	Lower expr.	0
BRCA	NFE2L2	DSS	0.737363	0.16278	0.160952	Lower expr.	0
BRCA	NFE2L2	DFI	0.849046	0.454701	0.454207	Lower expr.	0
BRCA	OPLAH	OS	1.12182	0.47644	0.474902	Higher expr.	0
BRCA	OPLAH	PFS	1.05813	0.685209	0.683844	Higher expr.	0
BRCA	OPLAH	DSS	0.903542	0.643306	0.645551	Lower expr.	0
BRCA	OPLAH	DFI	1.23286	0.338817	0.337945	Higher expr.	0
BRCA	PARK7	OS	0.858884	0.34847	0.348362	Lower expr.	0
BRCA	PARK7	PFS	0.773963	0.0688785	0.0681214	Lower expr.	0
BRCA	PARK7	DSS	0.869043	0.51949	0.519604	Lower expr.	0
BRCA	PARK7	DFI	0.758526	0.210179	0.208733	Lower expr.	0
BRCA	SLC1A1	OS	0.788927	0.144452	0.14311	Lower expr.	0
BRCA	SLC1A1	PFS	0.881392	0.365027	0.363841	Lower expr.	0
BRCA	SLC1A1	DSS	0.857433	0.479483	0.477658	Lower expr.	0
BRCA	SLC1A1	DFI	0.870058	0.524733	0.524398	Lower expr.	0
BRCA	SLC1A2	OS	1.00316	0.984407	0.983743	Higher expr.	0
BRCA	SLC1A2	PFS	0.926213	0.582421	0.582763	Lower expr.	0
BRCA	SLC1A2	DSS	0.767235	0.231774	0.23042	Lower expr.	0
BRCA	SLC1A2	DFI	0.632526	0.0443898	0.042565	Lower expr.	0
BRCA	SLC7A11	OS	1.28143	0.126419	0.126033	Higher expr.	0
BRCA	SLC7A11	PFS	1.21944	0.155318	0.15544	Higher expr.	0
BRCA	SLC7A11	DSS	1.46707	0.08188	0.0804694	Higher expr.	0
BRCA	SLC7A11	DFI	1.35172	0.170607	0.168999	Higher expr.	0
BRCA	SOD1	OS	1.05245	0.751426	0.750198	Higher expr.	0
BRCA	SOD1	PFS	1.00356	0.97965	0.978911	Higher expr.	0
BRCA	SOD1	DSS	1.22749	0.347856	0.346285	Higher expr.	0
BRCA	SOD1	DFI	1.16846	0.477931	0.477488	Higher expr.	0
BRCA	SOD2	OS	0.873308	0.402843	0.401774	Lower expr.	0
BRCA	SOD2	PFS	0.855594	0.264872	0.263836	Lower expr.	0
BRCA	SOD2	DSS	0.873515	0.535328	0.53454	Lower expr.	0
BRCA	SOD2	DFI	0.8964	0.617561	0.617389	Lower expr.	0
CESC	ARL6IP5	OS	1.03059	0.898501	0.896961	Higher expr.	0
CESC	ARL6IP5	PFS	0.978491	0.919421	0.920952	Lower expr.	0
CESC	ARL6IP5	DSS	0.859096	0.577344	0.577783	Lower expr.	0
CESC	ARL6IP5	DFI	0.640079	0.269372	0.265906	Lower expr.	0
CESC	CHAC1	OS	1.15094	0.549458	0.548419	Higher expr.	0
CESC	CHAC1	PFS	1.02051	0.924198	0.923016	Higher expr.	0
CESC	CHAC1	DSS	1.21416	0.474002	0.473235	Higher expr.	0
CESC	CHAC1	DFI	0.930138	0.854295	0.854192	Lower expr.	0
CESC	CHAC2	OS	1.45222	0.11724	0.115064	Higher expr.	0
CESC	CHAC2	PFS	1.38624	0.129422	0.127938	Higher expr.	0
CESC	CHAC2	DSS	1.40893	0.207807	0.205105	Higher expr.	0
CESC	CHAC2	DFI	0.9922	0.98427	0.983093	Lower expr.	0
CESC	CTNS	OS	0.920332	0.72332	0.723574	Lower expr.	0
CESC	CTNS	PFS	0.795293	0.285024	0.284128	Lower expr.	0
CESC	CTNS	DSS	0.952978	0.858385	0.858883	Lower expr.	0
CESC	CTNS	DFI	0.86556	0.713926	0.713634	Lower expr.	0
CESC	DPEP1	OS	0.894078	0.633899	0.632624	Lower expr.	0
CESC	DPEP1	PFS	0.909439	0.656694	0.655771	Lower expr.	0
CESC	DPEP1	DSS	0.813282	0.448578	0.447337	Lower expr.	0
CESC	DPEP1	DFI	0.562188	0.16344	0.158011	Lower expr.	0
CESC	ETHE1	OS	1.05469	0.82014	0.820869	Higher expr.	0
CESC	ETHE1	PFS	0.829932	0.384095	0.383312	Lower expr.	0
CESC	ETHE1	DSS	1.18107	0.539308	0.53958	Higher expr.	0
CESC	ETHE1	DFI	0.828525	0.632768	0.6331	Lower expr.	0
CESC	G6PD	OS	0.725175	0.172996	0.170485	Lower expr.	0
CESC	G6PD	PFS	0.780708	0.247538	0.245446	Lower expr.	0
CESC	G6PD	DSS	0.681274	0.159379	0.156459	Lower expr.	0
CESC	G6PD	DFI	1.07406	0.856034	0.856913	Higher expr.	0
CESC	GCLC	OS	0.747392	0.22443	0.223408	Lower expr.	0
CESC	GCLC	PFS	0.741783	0.168923	0.167846	Lower expr.	0
CESC	GCLC	DSS	0.858126	0.575223	0.575238	Lower expr.	0
CESC	GCLC	DFI	0.720028	0.408055	0.405918	Lower expr.	0
CESC	GCLM	OS	0.788876	0.312744	0.310872	Lower expr.	0
CESC	GCLM	PFS	0.813563	0.334123	0.332241	Lower expr.	0
CESC	GCLM	DSS	0.663413	0.133667	0.130749	Lower expr.	0
CESC	GCLM	DFI	0.876986	0.738047	0.736904	Lower expr.	0
CESC	GGT1	OS	1.05769	0.811994	0.810851	Higher expr.	0
CESC	GGT1	PFS	1.2803	0.251105	0.249254	Higher expr.	0
CESC	GGT1	DSS	0.997056	0.991299	0.991838	Lower expr.	0
CESC	GGT1	DFI	1.51026	0.300856	0.297388	Higher expr.	0
CESC	GGT3P	OS	0.808259	0.368066	0.367104	Lower expr.	0
CESC	GGT3P	PFS	0.931468	0.740098	0.740798	Lower expr.	0
CESC	GGT3P	DSS	0.826953	0.482199	0.481524	Lower expr.	0
CESC	GGT3P	DFI	0.620568	0.236784	0.232733	Lower expr.	0
CESC	GGT5	OS	0.908758	0.683239	0.683422	Lower expr.	0
CESC	GGT5	PFS	1.07524	0.733865	0.734132	Higher expr.	0
CESC	GGT5	DSS	0.998018	0.994137	0.994628	Lower expr.	0
CESC	GGT5	DFI	1.44977	0.357107	0.35483	Higher expr.	0
CESC	GGT6	OS	0.703811	0.13815	0.135796	Lower expr.	0
CESC	GGT6	PFS	0.833208	0.39335	0.392347	Lower expr.	0
CESC	GGT6	DSS	0.797954	0.403529	0.401805	Lower expr.	0
CESC	GGT6	DFI	1.24975	0.574564	0.573626	Higher expr.	0
CESC	GGT7	OS	0.977078	0.921292	0.92212	Lower expr.	0
CESC	GGT7	PFS	1.07923	0.721558	0.720625	Higher expr.	0
CESC	GGT7	DSS	0.997254	0.991888	0.991961	Lower expr.	0
CESC	GGT7	DFI	1.12101	0.771608	0.772364	Higher expr.	0
CESC	GGTLC1	OS	1.01922	0.935724	0.935343	Higher expr.	0
CESC	GGTLC1	PFS	1.24104	0.314018	0.313055	Higher expr.	0
CESC	GGTLC1	DSS	0.903936	0.709747	0.710061	Lower expr.	0
CESC	GGTLC1	DFI	1.19806	0.646696	0.647096	Higher expr.	0
CESC	GGTLC2	OS	0.834624	0.445091	0.444651	Lower expr.	0
CESC	GGTLC2	PFS	0.907088	0.64948	0.650369	Lower expr.	0
CESC	GGTLC2	DSS	0.70905	0.208964	0.206471	Lower expr.	0
CESC	GGTLC2	DFI	0.70851	0.386024	0.384292	Lower expr.	0
CESC	GLO1	OS	0.905375	0.672089	0.671852	Lower expr.	0
CESC	GLO1	PFS	0.78113	0.250549	0.24926	Lower expr.	0
CESC	GLO1	DSS	1.00012	0.999644	0.999658	Higher expr.	0
CESC	GLO1	DFI	0.518039	0.111808	0.105492	Lower expr.	0
CESC	GLRX2	OS	1.40795	0.146285	0.144845	Higher expr.	0
CESC	GLRX2	PFS	1.38274	0.130117	0.1287	Higher expr.	0
CESC	GLRX2	DSS	1.57319	0.0959414	0.0933559	Higher expr.	0
CESC	GLRX2	DFI	1.48399	0.316593	0.312838	Higher expr.	0
CESC	GPX1	OS	0.597822	0.0329183	0.03105	Lower expr.	0
CESC	GPX1	PFS	0.593076	0.0178088	0.0166027	Lower expr.	0
CESC	GPX1	DSS	0.487891	0.0116024	0.009919	Lower expr.	0
CESC	GPX1	DFI	0.657223	0.290822	0.287775	Lower expr.	0
CESC	GPX4	OS	0.687783	0.113853	0.111625	Lower expr.	0
CESC	GPX4	PFS	0.627237	0.0317274	0.0301926	Lower expr.	0
CESC	GPX4	DSS	0.689466	0.171534	0.168892	Lower expr.	0
CESC	GPX4	DFI	0.760254	0.485641	0.484285	Lower expr.	0
CESC	GSR	OS	0.622176	0.0459718	0.0441126	Lower expr.	0
CESC	GSR	PFS	0.854973	0.464965	0.464517	Lower expr.	0
CESC	GSR	DSS	0.591951	0.0560273	0.0534379	Lower expr.	0
CESC	GSR	DFI	1.1243	0.768601	0.769279	Higher expr.	0
CESC	GSS	OS	0.931057	0.760556	0.760488	Lower expr.	0
CESC	GSS	PFS	0.918663	0.691009	0.690562	Lower expr.	0
CESC	GSS	DSS	1.05694	0.838175	0.838096	Higher expr.	0
CESC	GSS	DFI	0.956721	0.910536	0.90961	Lower expr.	0
CESC	GSTA1	OS	0.755957	0.234499	0.233275	Lower expr.	0
CESC	GSTA1	PFS	0.878007	0.542285	0.542272	Lower expr.	0
CESC	GSTA1	DSS	0.696486	0.185987	0.183541	Lower expr.	0
CESC	GSTA1	DFI	1.56492	0.267304	0.263722	Higher expr.	0
CESC	GSTA2	OS	1.1808	0.478302	0.477568	Higher expr.	0
CESC	GSTA2	PFS	1.17838	0.443025	0.442327	Higher expr.	0
CESC	GSTA2	DSS	1.18884	0.522229	0.522125	Higher expr.	0
CESC	GSTA2	DFI	2.03134	0.0749903	0.0693123	Higher expr.	0
CESC	GSTA3	OS	0.730208	0.292607	0.290532	Lower expr.	0
CESC	GSTA3	PFS	0.785564	0.37343	0.372441	Lower expr.	0
CESC	GSTA3	DSS	0.867064	0.662634	0.661762	Lower expr.	0
CESC	GSTA3	DFI	1.07491	0.870318	0.869722	Higher expr.	0
CESC	GSTA4	OS	0.871906	0.560935	0.561183	Lower expr.	0
CESC	GSTA4	PFS	0.798229	0.293946	0.293304	Lower expr.	0
CESC	GSTA4	DSS	1.04476	0.871458	0.871411	Higher expr.	0
CESC	GSTA4	DFI	0.799983	0.570687	0.569816	Lower expr.	0
CESC	GSTA5	OS	1.12743	0.815768	0.815238	Higher expr.	0
CESC	GSTA5	PFS	1.071	0.881679	0.881216	Higher expr.	0
CESC	GSTA5	DSS	1.38297	0.532695	0.530583	Higher expr.	0
CESC	GSTA5	DFI	0.747653	0.775631	0.775003	Lower expr.	0
CESC	GSTK1	OS	1.18124	0.47913	0.478524	Higher expr.	0
CESC	GSTK1	PFS	1.31028	0.209556	0.207708	Higher expr.	0
CESC	GSTK1	DSS	1.12112	0.673183	0.67386	Higher expr.	0
CESC	GSTK1	DFI	1.09814	0.812237	0.81119	Higher expr.	0
CESC	GSTM1	OS	0.924866	0.739387	0.738663	Lower expr.	0
CESC	GSTM1	PFS	1.03567	0.869887	0.870922	Higher expr.	0
CESC	GSTM1	DSS	0.874977	0.620864	0.620549	Lower expr.	0
CESC	GSTM1	DFI	0.780137	0.531951	0.53077	Lower expr.	0
CESC	GSTM2	OS	0.929004	0.753747	0.753378	Lower expr.	0
CESC	GSTM2	PFS	1.05194	0.812863	0.812695	Higher expr.	0
CESC	GSTM2	DSS	1.03112	0.910055	0.910501	Higher expr.	0
CESC	GSTM2	DFI	0.894305	0.77607	0.77689	Lower expr.	0
CESC	GSTM3	OS	0.774597	0.279393	0.277574	Lower expr.	0
CESC	GSTM3	PFS	0.803573	0.30754	0.306284	Lower expr.	0
CESC	GSTM3	DSS	0.894531	0.679655	0.678598	Lower expr.	0
CESC	GSTM3	DFI	0.869954	0.722485	0.722264	Lower expr.	0
CESC	GSTM4	OS	0.602855	0.0345749	0.0327424	Lower expr.	0
CESC	GSTM4	PFS	0.680201	0.0745997	0.0729504	Lower expr.	0
CESC	GSTM4	DSS	0.646897	0.11148	0.108642	Lower expr.	0
CESC	GSTM4	DFI	0.732484	0.427701	0.425824	Lower expr.	0
CESC	GSTM5	OS	0.695866	0.125899	0.124038	Lower expr.	0
CESC	GSTM5	PFS	0.827491	0.377101	0.376344	Lower expr.	0
CESC	GSTM5	DSS	0.746978	0.281956	0.280167	Lower expr.	0
CESC	GSTM5	DFI	0.80346	0.580068	0.57837	Lower expr.	0
CESC	GSTO1	OS	0.838662	0.456431	0.455721	Lower expr.	0
CESC	GSTO1	PFS	0.740277	0.165996	0.164603	Lower expr.	0
CESC	GSTO1	DSS	0.823679	0.475842	0.475093	Lower expr.	0
CESC	GSTO1	DFI	0.826568	0.628497	0.628795	Lower expr.	0
CESC	GSTO2	OS	0.91634	0.709591	0.709796	Lower expr.	0
CESC	GSTO2	PFS	0.959027	0.84456	0.844867	Lower expr.	0
CESC	GSTO2	DSS	0.921818	0.763376	0.763744	Lower expr.	0
CESC	GSTO2	DFI	0.566217	0.16222	0.156771	Lower expr.	0
CESC	GSTP1	OS	1.08694	0.722604	0.722869	Higher expr.	0
CESC	GSTP1	PFS	1.02769	0.898191	0.897814	Higher expr.	0
CESC	GSTP1	DSS	1.03342	0.903178	0.903655	Higher expr.	0
CESC	GSTP1	DFI	1.0516	0.898074	0.897098	Higher expr.	0
CESC	GSTT1	OS	1.10968	0.657427	0.656873	Higher expr.	0
CESC	GSTT1	PFS	1.41741	0.104737	0.102858	Higher expr.	0
CESC	GSTT1	DSS	1.20127	0.498983	0.497892	Higher expr.	0
CESC	GSTT1	DFI	1.80459	0.152768	0.146802	Higher expr.	0
CESC	GSTT2	OS	1.13564	0.589018	0.588015	Higher expr.	0
CESC	GSTT2	PFS	1.17461	0.45314	0.452018	Higher expr.	0
CESC	GSTT2	DSS	1.09596	0.734697	0.733628	Higher expr.	0
CESC	GSTT2	DFI	1.52408	0.297147	0.292935	Higher expr.	0
CESC	GSTT4	OS	0.307625	0.24291	0.216409	Lower expr.	0
CESC	GSTT4	PFS	0.251992	0.171337	0.139342	Lower expr.	0
CESC	GSTT4	DSS	3.91548e-08	0.996369	0.177498	Lower expr.	0
CESC	GSTT4	DFI	1.08312e-07	0.996998	0.475931	Lower expr.	0
CESC	GSTZ1	OS	0.818727	0.397555	0.397197	Lower expr.	0
CESC	GSTZ1	PFS	0.925505	0.71788	0.718826	Lower expr.	0
CESC	GSTZ1	DSS	1.02429	0.929287	0.929194	Higher expr.	0
CESC	GSTZ1	DFI	1.71961	0.18961	0.184169	Higher expr.	0
CESC	HAGH	OS	0.605059	0.0362059	0.034281	Lower expr.	0
CESC	HAGH	PFS	0.799476	0.296893	0.296306	Lower expr.	0
CESC	HAGH	DSS	0.612271	0.0737183	0.0706861	Lower expr.	0
CESC	HAGH	DFI	0.922007	0.836784	0.837751	Lower expr.	0
CESC	HPGDS	OS	0.812114	0.375427	0.373983	Lower expr.	0
CESC	HPGDS	PFS	0.838062	0.408043	0.407421	Lower expr.	0
CESC	HPGDS	DSS	0.813202	0.444295	0.442693	Lower expr.	0
CESC	HPGDS	DFI	0.76249	0.490943	0.490324	Lower expr.	0
CESC	IDH1	OS	1.50891	0.0876071	0.0851345	Higher expr.	0
CESC	IDH1	PFS	1.68584	0.0185022	0.0171365	Higher expr.	0
CESC	IDH1	DSS	1.4537	0.1742	0.171607	Higher expr.	0
CESC	IDH1	DFI	1.52126	0.298177	0.295088	Higher expr.	0
CESC	MGST2	OS	1.05597	0.816312	0.81661	Higher expr.	0
CESC	MGST2	PFS	0.967403	0.876572	0.876911	Lower expr.	0
CESC	MGST2	DSS	1.02234	0.93475	0.935218	Higher expr.	0
CESC	MGST2	DFI	0.699953	0.370023	0.368041	Lower expr.	0
CESC	MMACHC	OS	1.16697	0.512171	0.51225	Higher expr.	0
CESC	MMACHC	PFS	1.22962	0.336495	0.33603	Higher expr.	0
CESC	MMACHC	DSS	1.13893	0.630578	0.630335	Higher expr.	0
CESC	MMACHC	DFI	1.4606	0.34046	0.337527	Higher expr.	0
CESC	NAT8	OS	1.04238	0.859472	0.860144	Higher expr.	0
CESC	NAT8	PFS	1.22228	0.34865	0.348516	Higher expr.	0
CESC	NAT8	DSS	1.02697	0.921452	0.92148	Higher expr.	0
CESC	NAT8	DFI	1.27597	0.5394	0.538277	Higher expr.	0
CESC	NFE2L2	OS	0.822027	0.404292	0.402687	Lower expr.	0
CESC	NFE2L2	PFS	0.700032	0.0969175	0.0947506	Lower expr.	0
CESC	NFE2L2	DSS	0.768436	0.331623	0.329856	Lower expr.	0
CESC	NFE2L2	DFI	0.525123	0.111768	0.105474	Lower expr.	0
CESC	OPLAH	OS	1.42158	0.137828	0.136132	Higher expr.	0
CESC	OPLAH	PFS	1.57188	0.0380597	0.0365188	Higher expr.	0
CESC	OPLAH	DSS	1.39325	0.222831	0.220901	Higher expr.	0
CESC	OPLAH	DFI	1.59929	0.236991	0.232136	Higher expr.	0
CESC	PARK7	OS	1.07145	0.768308	0.767929	Higher expr.	0
CESC	PARK7	PFS	1.18567	0.424905	0.423753	Higher expr.	0
CESC	PARK7	DSS	1.17579	0.54899	0.548911	Higher expr.	0
CESC	PARK7	DFI	2.05485	0.0809693	0.0745539	Higher expr.	0
CESC	SLC1A1	OS	1.19892	0.442415	0.441075	Higher expr.	0
CESC	SLC1A1	PFS	1.2903	0.237125	0.235743	Higher expr.	0
CESC	SLC1A1	DSS	1.37549	0.248009	0.245437	Higher expr.	0
CESC	SLC1A1	DFI	1.74868	0.175939	0.170673	Higher expr.	0
CESC	SLC1A2	OS	0.596572	0.0320332	0.0302187	Lower expr.	0
CESC	SLC1A2	PFS	0.746788	0.173833	0.172236	Lower expr.	0
CESC	SLC1A2	DSS	0.579965	0.0498974	0.047248	Lower expr.	0
CESC	SLC1A2	DFI	1.02398	0.952023	0.952881	Higher expr.	0
CESC	SLC7A11	OS	1.14117	0.577287	0.577281	Higher expr.	0
CESC	SLC7A11	PFS	1.09676	0.666915	0.666743	Higher expr.	0
CESC	SLC7A11	DSS	1.37263	0.247957	0.246167	Higher expr.	0
CESC	SLC7A11	DFI	1.06024	0.882286	0.882216	Higher expr.	0
CESC	SOD1	OS	0.714406	0.159412	0.157477	Lower expr.	0
CESC	SOD1	PFS	0.689285	0.0877242	0.0860878	Lower expr.	0
CESC	SOD1	DSS	0.896767	0.687782	0.687617	Lower expr.	0
CESC	SOD1	DFI	0.650334	0.280638	0.277459	Lower expr.	0
CESC	SOD2	OS	1.29442	0.275211	0.273749	Higher expr.	0
CESC	SOD2	PFS	1.03985	0.854872	0.854387	Higher expr.	0
CESC	SOD2	DSS	1.09806	0.729167	0.72901	Higher expr.	0
CESC	SOD2	DFI	0.871115	0.726361	0.726102	Lower expr.	0
CHOL	ARL6IP5	OS	0.470941	0.132578	0.123684	Lower expr.	0
CHOL	ARL6IP5	PFS	0.387358	0.0346286	0.0287059	Lower expr.	0
CHOL	ARL6IP5	DSS	0.5565	0.257114	0.250401	Lower expr.	0
CHOL	ARL6IP5	DFI	0.506846	0.285269	0.27629	Lower expr.	0
CHOL	CHAC1	OS	0.813286	0.672694	0.672165	Lower expr.	0
CHOL	CHAC1	PFS	0.600334	0.234772	0.229808	Lower expr.	0
CHOL	CHAC1	DSS	0.810657	0.687261	0.686738	Lower expr.	0
CHOL	CHAC1	DFI	0.451437	0.220359	0.208724	Lower expr.	0
CHOL	CHAC2	OS	1.30148	0.589005	0.58795	Higher expr.	0
CHOL	CHAC2	PFS	0.816237	0.635796	0.63522	Lower expr.	0
CHOL	CHAC2	DSS	1.04001	0.939797	0.939794	Higher expr.	0
CHOL	CHAC2	DFI	0.548377	0.354436	0.347426	Lower expr.	0
CHOL	CTNS	OS	2.99886	0.0370917	0.0284991	Higher expr.	0
CHOL	CTNS	PFS	2.00617	0.111252	0.10449	Higher expr.	0
CHOL	CTNS	DSS	2.58241	0.0788969	0.0682576	Higher expr.	0
CHOL	CTNS	DFI	2.10762	0.249914	0.23929	Higher expr.	0
CHOL	DPEP1	OS	0.87667	0.787211	0.787064	Lower expr.	0
CHOL	DPEP1	PFS	0.373947	0.0281261	0.0226101	Lower expr.	0
CHOL	DPEP1	DSS	0.678007	0.462316	0.459551	Lower expr.	0
CHOL	DPEP1	DFI	0.361026	0.117163	0.102504	Lower expr.	0
CHOL	ETHE1	OS	1.30835	0.582499	0.5814	Higher expr.	0
CHOL	ETHE1	PFS	1.27405	0.572139	0.571207	Higher expr.	0
CHOL	ETHE1	DSS	1.05482	0.918332	0.918323	Higher expr.	0
CHOL	ETHE1	DFI	2.05092	0.298272	0.287987	Higher expr.	0
CHOL	G6PD	OS	1.10663	0.837621	0.837553	Higher expr.	0
CHOL	G6PD	PFS	1.14514	0.752286	0.752106	Higher expr.	0
CHOL	G6PD	DSS	1.16196	0.776609	0.776409	Higher expr.	0
CHOL	G6PD	DFI	3.1171	0.151505	0.130707	Higher expr.	0
CHOL	GCLC	OS	1.0524	0.916851	0.916842	Higher expr.	0
CHOL	GCLC	PFS	0.940444	0.885791	0.885774	Lower expr.	0
CHOL	GCLC	DSS	1.07705	0.886811	0.886787	Higher expr.	0
CHOL	GCLC	DFI	0.641804	0.484429	0.480906	Lower expr.	0
CHOL	GCLM	OS	1.72633	0.269571	0.263771	Higher expr.	0
CHOL	GCLM	PFS	1.19303	0.679997	0.679612	Higher expr.	0
CHOL	GCLM	DSS	1.41616	0.503119	0.501016	Higher expr.	0
CHOL	GCLM	DFI	1.53819	0.505641	0.502395	Higher expr.	0
CHOL	GGT1	OS	0.425889	0.089476	0.080873	Lower expr.	0
CHOL	GGT1	PFS	0.579462	0.206022	0.200675	Lower expr.	0
CHOL	GGT1	DSS	0.502552	0.191475	0.183438	Lower expr.	0
CHOL	GGT1	DFI	0.467084	0.240519	0.229588	Lower expr.	0
CHOL	GGT3P	OS	0.558619	0.239355	0.23326	Lower expr.	0
CHOL	GGT3P	PFS	0.831465	0.66609	0.665652	Lower expr.	0
CHOL	GGT3P	DSS	0.679774	0.462917	0.460316	Lower expr.	0
CHOL	GGT3P	DFI	0.619968	0.459925	0.45571	Lower expr.	0
CHOL	GGT5	OS	0.70586	0.476149	0.474051	Lower expr.	0
CHOL	GGT5	PFS	0.357335	0.0271975	0.0215782	Lower expr.	0
CHOL	GGT5	DSS	0.652253	0.413674	0.410356	Lower expr.	0
CHOL	GGT5	DFI	0.370026	0.126559	0.112091	Lower expr.	0
CHOL	GGT6	OS	1.82397	0.225716	0.219035	Higher expr.	0
CHOL	GGT6	PFS	1.25568	0.594765	0.593987	Higher expr.	0
CHOL	GGT6	DSS	1.5279	0.415378	0.411993	Higher expr.	0
CHOL	GGT6	DFI	1.54718	0.491774	0.488411	Higher expr.	0
CHOL	GGT7	OS	1.43742	0.459013	0.456665	Higher expr.	0
CHOL	GGT7	PFS	1.14727	0.747565	0.747375	Higher expr.	0
CHOL	GGT7	DSS	1.48337	0.450366	0.447584	Higher expr.	0
CHOL	GGT7	DFI	2.30805	0.227344	0.214303	Higher expr.	0
CHOL	GGTLC1	OS	0.681387	0.433351	0.430651	Lower expr.	0
CHOL	GGTLC1	PFS	0.991263	0.983605	0.983605	Lower expr.	0
CHOL	GGTLC1	DSS	0.840601	0.738944	0.738639	Lower expr.	0
CHOL	GGTLC1	DFI	0.896642	0.86337	0.863304	Lower expr.	0
CHOL	GGTLC2	OS	1.13862	0.785101	0.784957	Higher expr.	0
CHOL	GGTLC2	PFS	1.19674	0.675323	0.674915	Higher expr.	0
CHOL	GGTLC2	DSS	1.14766	0.785447	0.785285	Higher expr.	0
CHOL	GGTLC2	DFI	0.817856	0.755762	0.755367	Lower expr.	0
CHOL	GLO1	OS	2.136	0.131315	0.122563	Higher expr.	0
CHOL	GLO1	PFS	2.03871	0.103778	0.0970127	Higher expr.	0
CHOL	GLO1	DSS	1.80494	0.25623	0.249645	Higher expr.	0
CHOL	GLO1	DFI	1.53547	0.508546	0.505373	Higher expr.	0
CHOL	GLRX2	OS	1.89682	0.187976	0.18074	Higher expr.	0
CHOL	GLRX2	PFS	2.39857	0.0512166	0.0446497	Higher expr.	0
CHOL	GLRX2	DSS	1.99255	0.184487	0.176173	Higher expr.	0
CHOL	GLRX2	DFI	2.66492	0.157984	0.14239	Higher expr.	0
CHOL	GPX1	OS	0.866609	0.761734	0.761539	Lower expr.	0
CHOL	GPX1	PFS	1.0516	0.906658	0.906648	Higher expr.	0
CHOL	GPX1	DSS	0.850781	0.746939	0.746676	Lower expr.	0
CHOL	GPX1	DFI	2.63854	0.220728	0.203186	Higher expr.	0
CHOL	GPX4	OS	2.36332	0.0865503	0.077393	Higher expr.	0
CHOL	GPX4	PFS	2.89557	0.0219761	0.016732	Higher expr.	0
CHOL	GPX4	DSS	2.59084	0.0787989	0.068289	Higher expr.	0
CHOL	GPX4	DFI	7.05217	0.0144408	0.00475218	Higher expr.	0
CHOL	GSR	OS	1.15857	0.763555	0.763356	Higher expr.	0
CHOL	GSR	PFS	1.16577	0.721137	0.720881	Higher expr.	0
CHOL	GSR	DSS	1.21268	0.71153	0.71112	Higher expr.	0
CHOL	GSR	DFI	0.895331	0.864509	0.864442	Lower expr.	0
CHOL	GSS	OS	1.58693	0.341644	0.337473	Higher expr.	0
CHOL	GSS	PFS	1.44099	0.400446	0.397858	Higher expr.	0
CHOL	GSS	DSS	1.72613	0.292663	0.286852	Higher expr.	0
CHOL	GSS	DFI	5.46253	0.107888	0.0710691	Higher expr.	0
CHOL	GSTA1	OS	1.18161	0.732823	0.732535	Higher expr.	0
CHOL	GSTA1	PFS	0.709389	0.429388	0.427149	Lower expr.	0
CHOL	GSTA1	DSS	0.91889	0.873143	0.873106	Lower expr.	0
CHOL	GSTA1	DFI	0.377273	0.160347	0.14484	Lower expr.	0
CHOL	GSTA2	OS	0.991921	0.986971	0.986971	Lower expr.	0
CHOL	GSTA2	PFS	0.555625	0.186484	0.180339	Lower expr.	0
CHOL	GSTA2	DSS	0.740844	0.586248	0.584889	Lower expr.	0
CHOL	GSTA2	DFI	0.299052	0.0815418	0.0648241	Lower expr.	0
CHOL	GSTA4	OS	2.01769	0.148106	0.140099	Higher expr.	0
CHOL	GSTA4	PFS	1.23174	0.625893	0.625277	Higher expr.	0
CHOL	GSTA4	DSS	1.71202	0.287483	0.281801	Higher expr.	0
CHOL	GSTA4	DFI	0.844388	0.793943	0.793707	Lower expr.	0
CHOL	GSTK1	OS	1.8295	0.236213	0.229337	Higher expr.	0
CHOL	GSTK1	PFS	1.65208	0.249132	0.244312	Higher expr.	0
CHOL	GSTK1	DSS	1.53162	0.421064	0.41766	Higher expr.	0
CHOL	GSTK1	DFI	1.06117	0.925287	0.925276	Higher expr.	0
CHOL	GSTM1	OS	1.32788	0.551762	0.550464	Higher expr.	0
CHOL	GSTM1	PFS	1.44731	0.395086	0.392436	Higher expr.	0
CHOL	GSTM1	DSS	1.36476	0.539415	0.537833	Higher expr.	0
CHOL	GSTM1	DFI	1.1796	0.795176	0.794956	Higher expr.	0
CHOL	GSTM2	OS	0.677348	0.41264	0.409729	Lower expr.	0
CHOL	GSTM2	PFS	0.762803	0.530064	0.528886	Lower expr.	0
CHOL	GSTM2	DSS	0.644366	0.384377	0.380612	Lower expr.	0
CHOL	GSTM2	DFI	0.941154	0.925515	0.925503	Lower expr.	0
CHOL	GSTM3	OS	0.857956	0.747239	0.747003	Lower expr.	0
CHOL	GSTM3	PFS	0.807513	0.622572	0.621916	Lower expr.	0
CHOL	GSTM3	DSS	0.821918	0.697839	0.697385	Lower expr.	0
CHOL	GSTM3	DFI	1.60248	0.466944	0.46292	Higher expr.	0
CHOL	GSTM4	OS	0.775139	0.591674	0.590715	Lower expr.	0
CHOL	GSTM4	PFS	0.980188	0.962867	0.962867	Lower expr.	0
CHOL	GSTM4	DSS	0.750474	0.568625	0.567351	Lower expr.	0
CHOL	GSTM4	DFI	0.678379	0.541746	0.53929	Lower expr.	0
CHOL	GSTM5	OS	1.01707	0.971686	0.971686	Higher expr.	0
CHOL	GSTM5	PFS	0.829352	0.663977	0.663533	Lower expr.	0
CHOL	GSTM5	DSS	0.994897	0.99195	0.99195	Lower expr.	0
CHOL	GSTM5	DFI	0.402467	0.18845	0.173768	Lower expr.	0
CHOL	GSTO1	OS	0.973084	0.955592	0.955591	Lower expr.	0
CHOL	GSTO1	PFS	1.5683	0.299902	0.295858	Higher expr.	0
CHOL	GSTO1	DSS	0.951776	0.924547	0.92454	Lower expr.	0
CHOL	GSTO1	DFI	0.974391	0.967375	0.967374	Lower expr.	0
CHOL	GSTO2	OS	1.45045	0.435459	0.432897	Higher expr.	0
CHOL	GSTO2	PFS	1.74311	0.207826	0.202487	Higher expr.	0
CHOL	GSTO2	DSS	1.18829	0.731473	0.731163	Higher expr.	0
CHOL	GSTO2	DFI	1.2365	0.743611	0.743158	Higher expr.	0
CHOL	GSTP1	OS	1.39822	0.481026	0.479007	Higher expr.	0
CHOL	GSTP1	PFS	1.26087	0.588725	0.587897	Higher expr.	0
CHOL	GSTP1	DSS	1.16038	0.76658	0.766374	Higher expr.	0
CHOL	GSTP1	DFI	1.00312	0.996085	0.996085	Higher expr.	0
CHOL	GSTT1	OS	0.990223	0.984216	0.984216	Lower expr.	0
CHOL	GSTT1	PFS	1.48713	0.354719	0.351592	Higher expr.	0
CHOL	GSTT1	DSS	0.945898	0.916202	0.916193	Lower expr.	0
CHOL	GSTT1	DFI	0.879521	0.852676	0.852577	Lower expr.	0
CHOL	GSTT2	OS	1.75724	0.25626	0.250273	Higher expr.	0
CHOL	GSTT2	PFS	0.939943	0.885479	0.885461	Lower expr.	0
CHOL	GSTT2	DSS	1.92977	0.215319	0.207449	Higher expr.	0
CHOL	GSTT2	DFI	1.87728	0.334198	0.326714	Higher expr.	0
CHOL	GSTZ1	OS	1.82553	0.239057	0.232293	Higher expr.	0
CHOL	GSTZ1	PFS	1.62133	0.266728	0.262184	Higher expr.	0
CHOL	GSTZ1	DSS	1.49952	0.446122	0.443163	Higher expr.	0
CHOL	GSTZ1	DFI	1.44997	0.558249	0.556028	Higher expr.	0
CHOL	HAGH	OS	1.58359	0.354331	0.350273	Higher expr.	0
CHOL	HAGH	PFS	1.74438	0.201485	0.195856	Higher expr.	0
CHOL	HAGH	DSS	1.65704	0.342012	0.337143	Higher expr.	0
CHOL	HAGH	DFI	1.60801	0.464696	0.460649	Higher expr.	0
CHOL	HPGDS	OS	0.90047	0.830137	0.830063	Lower expr.	0
CHOL	HPGDS	PFS	0.739948	0.483238	0.481616	Lower expr.	0
CHOL	HPGDS	DSS	1.15414	0.783213	0.783039	Higher expr.	0
CHOL	HPGDS	DFI	2.63854	0.220728	0.203186	Higher expr.	0
CHOL	IDH1	OS	1.0533	0.915847	0.915839	Higher expr.	0
CHOL	IDH1	PFS	1.00788	0.985389	0.985389	Higher expr.	0
CHOL	IDH1	DSS	0.796102	0.669569	0.668944	Lower expr.	0
CHOL	IDH1	DFI	0.424531	0.215835	0.20227	Lower expr.	0
CHOL	MGST2	OS	0.748105	0.5564	0.555116	Lower expr.	0
CHOL	MGST2	PFS	0.725844	0.455452	0.453554	Lower expr.	0
CHOL	MGST2	DSS	0.712197	0.518954	0.51711	Lower expr.	0
CHOL	MGST2	DFI	0.848776	0.795818	0.795597	Lower expr.	0
CHOL	MMACHC	OS	0.881913	0.791463	0.791335	Lower expr.	0
CHOL	MMACHC	PFS	0.948069	0.901043	0.901032	Lower expr.	0
CHOL	MMACHC	DSS	0.847566	0.74276	0.742489	Lower expr.	0
CHOL	MMACHC	DFI	0.685166	0.558601	0.556277	Lower expr.	0
CHOL	NAT8	OS	1.23189	0.668932	0.66838	Higher expr.	0
CHOL	NAT8	PFS	1.8232	0.162337	0.156228	Higher expr.	0
CHOL	NAT8	DSS	1.22468	0.696442	0.69596	Higher expr.	0
CHOL	NAT8	DFI	1.30393	0.682474	0.681613	Higher expr.	0
CHOL	NFE2L2	OS	1.05052	0.91786	0.917852	Higher expr.	0
CHOL	NFE2L2	PFS	0.753105	0.513958	0.512564	Lower expr.	0
CHOL	NFE2L2	DSS	1.0672	0.898003	0.897986	Higher expr.	0
CHOL	NFE2L2	DFI	0.293955	0.122635	0.101025	Lower expr.	0
CHOL	OPLAH	OS	1.18638	0.729459	0.729148	Higher expr.	0
CHOL	OPLAH	PFS	1.00523	0.990296	0.990296	Higher expr.	0
CHOL	OPLAH	DSS	1.25632	0.665946	0.665276	Higher expr.	0
CHOL	OPLAH	DFI	0.894336	0.85999	0.859918	Lower expr.	0
CHOL	PARK7	OS	0.567005	0.259409	0.253526	Lower expr.	0
CHOL	PARK7	PFS	0.554288	0.170141	0.164168	Lower expr.	0
CHOL	PARK7	DSS	0.400399	0.103756	0.0932727	Lower expr.	0
CHOL	PARK7	DFI	0.860753	0.816976	0.816811	Lower expr.	0
CHOL	SLC1A1	OS	0.398462	0.0674917	0.0586383	Lower expr.	0
CHOL	SLC1A1	PFS	0.746192	0.497353	0.49588	Lower expr.	0
CHOL	SLC1A1	DSS	0.45984	0.134737	0.125468	Lower expr.	0
CHOL	SLC1A1	DFI	0.427603	0.223354	0.210524	Lower expr.	0
CHOL	SLC1A2	OS	0.94622	0.907638	0.907626	Lower expr.	0
CHOL	SLC1A2	PFS	0.456028	0.0815197	0.0745432	Lower expr.	0
CHOL	SLC1A2	DSS	0.736446	0.555093	0.553583	Lower expr.	0
CHOL	SLC1A2	DFI	0.161854	0.00997453	0.00365253	Lower expr.	0
CHOL	SLC7A11	OS	1.61559	0.33318	0.328709	Higher expr.	0
CHOL	SLC7A11	PFS	1.51237	0.34098	0.337579	Higher expr.	0
CHOL	SLC7A11	DSS	1.76789	0.282152	0.275863	Higher expr.	0
CHOL	SLC7A11	DFI	2.23484	0.215494	0.203697	Higher expr.	0
CHOL	SOD1	OS	0.924998	0.873358	0.873327	Lower expr.	0
CHOL	SOD1	PFS	0.847406	0.69852	0.698197	Lower expr.	0
CHOL	SOD1	DSS	0.906484	0.850514	0.850457	Lower expr.	0
CHOL	SOD1	DFI	0.378146	0.134981	0.120798	Lower expr.	0
CHOL	SOD2	OS	1.20342	0.696132	0.695733	Higher expr.	0
CHOL	SOD2	PFS	1.22827	0.631208	0.630622	Higher expr.	0
CHOL	SOD2	DSS	1.19249	0.726584	0.726258	Higher expr.	0
CHOL	SOD2	DFI	1.90367	0.319885	0.311691	Higher expr.	0
COAD	ARL6IP5	OS	1.29188	0.292416	0.291111	Higher expr.	0
COAD	ARL6IP5	PFS	1.16552	0.429756	0.42861	Higher expr.	0
COAD	ARL6IP5	DSS	1.38328	0.338049	0.335955	Higher expr.	0
COAD	ARL6IP5	DFI	0.598643	0.324174	0.319115	Lower expr.	0
COAD	CHAC1	OS	1.00822	0.972967	0.972967	Higher expr.	0
COAD	CHAC1	PFS	0.901237	0.591644	0.592041	Lower expr.	0
COAD	CHAC1	DSS	0.944154	0.863317	0.863299	Lower expr.	0
COAD	CHAC1	DFI	1.28793	0.626215	0.625319	Higher expr.	0
COAD	CHAC2	OS	0.792282	0.336941	0.335862	Lower expr.	0
COAD	CHAC2	PFS	0.768458	0.176851	0.175038	Lower expr.	0
COAD	CHAC2	DSS	0.753885	0.401286	0.399753	Lower expr.	0
COAD	CHAC2	DFI	0.435885	0.111112	0.101573	Lower expr.	0
COAD	CTNS	OS	0.969213	0.896913	0.896909	Lower expr.	0
COAD	CTNS	PFS	1.08646	0.668347	0.66695	Higher expr.	0
COAD	CTNS	DSS	1.19533	0.593823	0.593339	Higher expr.	0
COAD	CTNS	DFI	0.956021	0.92913	0.929125	Lower expr.	0
COAD	DPEP1	OS	0.939329	0.795077	0.795045	Lower expr.	0
COAD	DPEP1	PFS	1.25529	0.242424	0.241219	Higher expr.	0
COAD	DPEP1	DSS	1.09703	0.782588	0.782513	Higher expr.	0
COAD	DPEP1	DFI	2.20081	0.144265	0.134175	Higher expr.	0
COAD	ETHE1	OS	0.631388	0.0600171	0.0578709	Lower expr.	0
COAD	ETHE1	PFS	0.765073	0.169267	0.167567	Lower expr.	0
COAD	ETHE1	DSS	0.581666	0.110322	0.106111	Lower expr.	0
COAD	ETHE1	DFI	0.943607	0.911595	0.911583	Lower expr.	0
COAD	G6PD	OS	1.07902	0.753269	0.753213	Higher expr.	0
COAD	G6PD	PFS	0.980113	0.917431	0.916379	Lower expr.	0
COAD	G6PD	DSS	1.11941	0.737789	0.737659	Higher expr.	0
COAD	G6PD	DFI	1.10609	0.84172	0.841655	Higher expr.	0
COAD	GCLC	OS	0.864181	0.546814	0.54647	Lower expr.	0
COAD	GCLC	PFS	0.860533	0.43934	0.439496	Lower expr.	0
COAD	GCLC	DSS	0.806707	0.523391	0.522627	Lower expr.	0
COAD	GCLC	DFI	1.18121	0.739974	0.73969	Higher expr.	0
COAD	GCLM	OS	0.713269	0.164747	0.162763	Lower expr.	0
COAD	GCLM	PFS	0.821275	0.310066	0.309312	Lower expr.	0
COAD	GCLM	DSS	0.712755	0.313506	0.311219	Lower expr.	0
COAD	GCLM	DFI	1.26745	0.663684	0.66297	Higher expr.	0
COAD	GGT1	OS	0.990724	0.969165	0.969165	Lower expr.	0
COAD	GGT1	PFS	1.04251	0.829632	0.829252	Higher expr.	0
COAD	GGT1	DSS	1.37438	0.347456	0.345441	Higher expr.	0
COAD	GGT1	DFI	1.33918	0.574374	0.573057	Higher expr.	0
COAD	GGT3P	OS	0.889746	0.628458	0.628265	Lower expr.	0
COAD	GGT3P	PFS	1.06933	0.729219	0.729538	Higher expr.	0
COAD	GGT3P	DSS	1.18818	0.607811	0.607371	Higher expr.	0
COAD	GGT3P	DFI	1.2819	0.625706	0.624858	Higher expr.	0
COAD	GGT5	OS	1.59107	0.0567709	0.0546636	Higher expr.	0
COAD	GGT5	PFS	1.514	0.0335112	0.0322436	Higher expr.	0
COAD	GGT5	DSS	2.1376	0.0291558	0.0255469	Higher expr.	0
COAD	GGT5	DFI	1.68925	0.298997	0.293534	Higher expr.	0
COAD	GGT6	OS	0.632422	0.0656587	0.0633525	Lower expr.	0
COAD	GGT6	PFS	0.783602	0.210821	0.209779	Lower expr.	0
COAD	GGT6	DSS	0.53544	0.0725052	0.0680218	Lower expr.	0
COAD	GGT6	DFI	0.753247	0.572148	0.570885	Lower expr.	0
COAD	GGT7	OS	1.32493	0.247892	0.246407	Higher expr.	0
COAD	GGT7	PFS	1.31749	0.157095	0.15537	Higher expr.	0
COAD	GGT7	DSS	1.48329	0.245554	0.242578	Higher expr.	0
COAD	GGT7	DFI	1.73798	0.277706	0.271917	Higher expr.	0
COAD	GGTLC1	OS	0.976188	0.920325	0.920323	Lower expr.	0
COAD	GGTLC1	PFS	0.988656	0.95307	0.953198	Lower expr.	0
COAD	GGTLC1	DSS	1.30343	0.433262	0.431918	Higher expr.	0
COAD	GGTLC1	DFI	1.05296	0.919185	0.919177	Higher expr.	0
COAD	GGTLC2	OS	0.976623	0.921789	0.921787	Lower expr.	0
COAD	GGTLC2	PFS	1.01603	0.934498	0.93464	Higher expr.	0
COAD	GGTLC2	DSS	1.45364	0.274246	0.271465	Higher expr.	0
COAD	GGTLC2	DFI	0.817601	0.689858	0.689382	Lower expr.	0
COAD	GLO1	OS	0.768417	0.283616	0.282353	Lower expr.	0
COAD	GLO1	PFS	0.640031	0.0236721	0.0225104	Lower expr.	0
COAD	GLO1	DSS	0.688038	0.271231	0.268684	Lower expr.	0
COAD	GLO1	DFI	0.372171	0.0701623	0.0600728	Lower expr.	0
COAD	GLRX2	OS	1.06064	0.80846	0.808433	Higher expr.	0
COAD	GLRX2	PFS	1.24008	0.271062	0.270881	Higher expr.	0
COAD	GLRX2	DSS	1.37749	0.35	0.347969	Higher expr.	0
COAD	GLRX2	DFI	1.30569	0.594574	0.593495	Higher expr.	0
COAD	GPX1	OS	0.902486	0.671246	0.671113	Lower expr.	0
COAD	GPX1	PFS	0.864162	0.452012	0.450364	Lower expr.	0
COAD	GPX1	DSS	0.874469	0.688692	0.688476	Lower expr.	0
COAD	GPX1	DFI	0.468893	0.143332	0.13406	Lower expr.	0
COAD	GPX4	OS	1.55526	0.0737568	0.0714553	Higher expr.	0
COAD	GPX4	PFS	1.14881	0.476403	0.476628	Higher expr.	0
COAD	GPX4	DSS	1.17042	0.637979	0.637636	Higher expr.	0
COAD	GPX4	DFI	0.576005	0.285923	0.279875	Lower expr.	0
COAD	GSR	OS	0.36016	0.000200593	0.000104445	Lower expr.	0
COAD	GSR	PFS	0.582486	0.00725753	0.00657354	Lower expr.	0
COAD	GSR	DSS	0.264615	0.000927083	0.000372779	Lower expr.	0
COAD	GSR	DFI	1.04741	0.928959	0.928953	Higher expr.	0
COAD	GSS	OS	0.953049	0.842153	0.842138	Lower expr.	0
COAD	GSS	PFS	1.03292	0.867466	0.868945	Higher expr.	0
COAD	GSS	DSS	0.724336	0.340941	0.338872	Lower expr.	0
COAD	GSS	DFI	2.52482	0.0804945	0.0709929	Higher expr.	0
COAD	GSTA1	OS	0.863401	0.542737	0.542379	Lower expr.	0
COAD	GSTA1	PFS	1.00713	0.970726	0.968889	Higher expr.	0
COAD	GSTA1	DSS	1.12055	0.734837	0.734701	Higher expr.	0
COAD	GSTA1	DFI	1.61911	0.375419	0.370986	Higher expr.	0
COAD	GSTA2	OS	0.963458	0.878253	0.878247	Lower expr.	0
COAD	GSTA2	PFS	1.10359	0.612203	0.61034	Higher expr.	0
COAD	GSTA2	DSS	1.01885	0.95556	0.955559	Higher expr.	0
COAD	GSTA2	DFI	2.83818	0.0731064	0.0614348	Higher expr.	0
COAD	GSTA3	OS	1.05906	0.936395	0.936387	Higher expr.	0
COAD	GSTA3	PFS	1.0127	0.982829	0.982265	Higher expr.	0
COAD	GSTA3	DSS	1.73535	0.449839	0.444105	Higher expr.	0
COAD	GSTA3	DFI	3.80957e-08	0.997671	0.381328	Lower expr.	0
COAD	GSTA4	OS	1.06177	0.804338	0.804309	Higher expr.	0
COAD	GSTA4	PFS	1.18223	0.390478	0.388559	Higher expr.	0
COAD	GSTA4	DSS	1.1839	0.615295	0.614879	Higher expr.	0
COAD	GSTA4	DFI	1.50482	0.449482	0.446359	Higher expr.	0
COAD	GSTK1	OS	0.974713	0.91614	0.916138	Lower expr.	0
COAD	GSTK1	PFS	0.972819	0.88753	0.885964	Lower expr.	0
COAD	GSTK1	DSS	1.17613	0.632494	0.632129	Higher expr.	0
COAD	GSTK1	DFI	1.37276	0.542918	0.541298	Higher expr.	0
COAD	GSTM1	OS	1.50585	0.0930185	0.0907996	Higher expr.	0
COAD	GSTM1	PFS	1.22232	0.300913	0.301085	Higher expr.	0
COAD	GSTM1	DSS	1.56755	0.182478	0.178925	Higher expr.	0
COAD	GSTM1	DFI	1.04418	0.931675	0.93167	Higher expr.	0
COAD	GSTM2	OS	1.53414	0.0798116	0.0775558	Higher expr.	0
COAD	GSTM2	PFS	1.32736	0.145552	0.145064	Higher expr.	0
COAD	GSTM2	DSS	2.46375	0.0127893	0.0100467	Higher expr.	0
COAD	GSTM2	DFI	1.76377	0.272894	0.266572	Higher expr.	0
COAD	GSTM3	OS	0.716174	0.169511	0.167583	Lower expr.	0
COAD	GSTM3	PFS	0.833352	0.34792	0.347882	Lower expr.	0
COAD	GSTM3	DSS	0.922974	0.811028	0.81098	Lower expr.	0
COAD	GSTM3	DFI	0.85622	0.758601	0.758369	Lower expr.	0
COAD	GSTM4	OS	0.687201	0.125405	0.12328	Lower expr.	0
COAD	GSTM4	PFS	0.757078	0.153995	0.152112	Lower expr.	0
COAD	GSTM4	DSS	0.687479	0.267462	0.264747	Lower expr.	0
COAD	GSTM4	DFI	0.598545	0.331509	0.3263	Lower expr.	0
COAD	GSTM5	OS	1.31969	0.254932	0.253439	Higher expr.	0
COAD	GSTM5	PFS	1.13125	0.524487	0.523209	Higher expr.	0
COAD	GSTM5	DSS	1.92378	0.0645949	0.0599845	Higher expr.	0
COAD	GSTM5	DFI	0.591569	0.300088	0.29472	Lower expr.	0
COAD	GSTO1	OS	1.70469	0.0321407	0.0301707	Higher expr.	0
COAD	GSTO1	PFS	1.23136	0.284897	0.283444	Higher expr.	0
COAD	GSTO1	DSS	2.62884	0.0095832	0.00712737	Higher expr.	0
COAD	GSTO1	DFI	1.05222	0.919762	0.919753	Higher expr.	0
COAD	GSTO2	OS	1.23002	0.392895	0.392056	Higher expr.	0
COAD	GSTO2	PFS	0.989866	0.958075	0.958621	Lower expr.	0
COAD	GSTO2	DSS	1.21124	0.566023	0.565429	Higher expr.	0
COAD	GSTO2	DFI	0.586323	0.289587	0.283889	Lower expr.	0
COAD	GSTP1	OS	0.788945	0.329919	0.328851	Lower expr.	0
COAD	GSTP1	PFS	0.886488	0.536657	0.536284	Lower expr.	0
COAD	GSTP1	DSS	0.812701	0.538065	0.537376	Lower expr.	0
COAD	GSTP1	DFI	0.975359	0.962509	0.962508	Lower expr.	0
COAD	GSTT1	OS	1.00028	0.999084	0.999084	Higher expr.	0
COAD	GSTT1	PFS	1.25684	0.237929	0.236283	Higher expr.	0
COAD	GSTT1	DSS	1.12222	0.730169	0.730027	Higher expr.	0
COAD	GSTT1	DFI	1.03386	0.948437	0.948434	Higher expr.	0
COAD	GSTT2	OS	0.956295	0.853575	0.853564	Lower expr.	0
COAD	GSTT2	PFS	1.09701	0.632607	0.631929	Higher expr.	0
COAD	GSTT2	DSS	1.02676	0.937107	0.937105	Higher expr.	0
COAD	GSTT2	DFI	1.35276	0.55888	0.557393	Higher expr.	0
COAD	GSTT4	OS	3.7436e-08	0.995262	0.0729136	Lower expr.	0
COAD	GSTT4	PFS	0.457712	0.275232	0.263256	Lower expr.	0
COAD	GSTT4	DSS	3.79318e-08	0.996624	0.203824	Lower expr.	0
COAD	GSTT4	DFI	1.73762	0.596533	0.591939	Higher expr.	0
COAD	GSTZ1	OS	0.646958	0.0743919	0.0721902	Lower expr.	0
COAD	GSTZ1	PFS	0.713822	0.0847462	0.0832729	Lower expr.	0
COAD	GSTZ1	DSS	0.610533	0.146113	0.142152	Lower expr.	0
COAD	GSTZ1	DFI	0.305064	0.0309496	0.0224206	Lower expr.	0
COAD	HAGH	OS	0.743563	0.22087	0.21921	Lower expr.	0
COAD	HAGH	PFS	0.749263	0.137734	0.135664	Lower expr.	0
COAD	HAGH	DSS	0.734571	0.357061	0.355192	Lower expr.	0
COAD	HAGH	DFI	1.07244	0.889921	0.889899	Higher expr.	0
COAD	HPGDS	OS	0.892789	0.638749	0.63857	Lower expr.	0
COAD	HPGDS	PFS	0.900983	0.591394	0.591051	Lower expr.	0
COAD	HPGDS	DSS	1.32293	0.407897	0.40637	Higher expr.	0
COAD	HPGDS	DFI	0.668906	0.425243	0.422137	Lower expr.	0
COAD	IDH1	OS	0.753573	0.242193	0.240643	Lower expr.	0
COAD	IDH1	PFS	0.880468	0.511059	0.511191	Lower expr.	0
COAD	IDH1	DSS	0.575637	0.106604	0.102239	Lower expr.	0
COAD	IDH1	DFI	0.793252	0.643353	0.642613	Lower expr.	0
COAD	MGST2	OS	0.555301	0.0187947	0.0172859	Lower expr.	0
COAD	MGST2	PFS	0.72836	0.105937	0.104416	Lower expr.	0
COAD	MGST2	DSS	0.488054	0.0399279	0.0361213	Lower expr.	0
COAD	MGST2	DFI	1.271	0.644887	0.644123	Higher expr.	0
COAD	MMACHC	OS	0.509374	0.00720334	0.00623077	Lower expr.	0
COAD	MMACHC	PFS	0.622073	0.0157607	0.0147386	Lower expr.	0
COAD	MMACHC	DSS	0.352123	0.00469357	0.00318061	Lower expr.	0
COAD	MMACHC	DFI	0.743417	0.554516	0.553092	Lower expr.	0
COAD	NAT8	OS	1.14797	0.568954	0.568658	Higher expr.	0
COAD	NAT8	PFS	1.12518	0.544563	0.545994	Higher expr.	0
COAD	NAT8	DSS	0.99367	0.98486	0.98486	Lower expr.	0
COAD	NAT8	DFI	1.06857	0.896021	0.896002	Higher expr.	0
COAD	NFE2L2	OS	1.35214	0.215351	0.21364	Higher expr.	0
COAD	NFE2L2	PFS	1.15347	0.461625	0.459539	Higher expr.	0
COAD	NFE2L2	DSS	1.42732	0.29427	0.291777	Higher expr.	0
COAD	NFE2L2	DFI	1.09557	0.856647	0.856599	Higher expr.	0
COAD	OPLAH	OS	0.987758	0.959328	0.959328	Lower expr.	0
COAD	OPLAH	PFS	1.01032	0.957704	0.958979	Higher expr.	0
COAD	OPLAH	DSS	0.983051	0.959177	0.959176	Lower expr.	0
COAD	OPLAH	DFI	0.901456	0.836234	0.836164	Lower expr.	0
COAD	PARK7	OS	0.634785	0.0628549	0.0607221	Lower expr.	0
COAD	PARK7	PFS	0.575001	0.00501049	0.00448457	Lower expr.	0
COAD	PARK7	DSS	0.757022	0.408516	0.407075	Lower expr.	0
COAD	PARK7	DFI	0.419797	0.0910623	0.081866	Lower expr.	0
COAD	SLC1A1	OS	0.626385	0.0587571	0.0565283	Lower expr.	0
COAD	SLC1A1	PFS	0.646429	0.0271403	0.0259444	Lower expr.	0
COAD	SLC1A1	DSS	0.486862	0.0425413	0.0383356	Lower expr.	0
COAD	SLC1A1	DFI	0.725399	0.525626	0.523883	Lower expr.	0
COAD	SLC1A2	OS	1.20573	0.442337	0.441708	Higher expr.	0
COAD	SLC1A2	PFS	1.08225	0.685551	0.684634	Higher expr.	0
COAD	SLC1A2	DSS	1.87709	0.0721432	0.0677624	Higher expr.	0
COAD	SLC1A2	DFI	0.375713	0.0707089	0.0603333	Lower expr.	0
COAD	SLC7A11	OS	1.2007	0.449167	0.448549	Higher expr.	0
COAD	SLC7A11	PFS	1.08652	0.668817	0.668648	Higher expr.	0
COAD	SLC7A11	DSS	1.09452	0.787525	0.787456	Higher expr.	0
COAD	SLC7A11	DFI	0.930695	0.890555	0.890532	Lower expr.	0
COAD	SOD1	OS	0.999401	0.998027	0.998027	Lower expr.	0
COAD	SOD1	PFS	0.971028	0.879626	0.87708	Lower expr.	0
COAD	SOD1	DSS	0.786966	0.476488	0.475453	Lower expr.	0
COAD	SOD1	DFI	0.709258	0.495626	0.493588	Lower expr.	0
COAD	SOD2	OS	1.22704	0.396762	0.395947	Higher expr.	0
COAD	SOD2	PFS	1.12186	0.553448	0.552961	Higher expr.	0
COAD	SOD2	DSS	1.59618	0.167647	0.163852	Higher expr.	0
COAD	SOD2	DFI	0.92601	0.883237	0.88321	Lower expr.	0
DLBC	ARL6IP5	OS	2.29923	0.264483	0.25211	Higher expr.	0
DLBC	ARL6IP5	PFS	1.7151	0.306369	0.301055	Higher expr.	0
DLBC	ARL6IP5	DSS	3.23766	0.309589	0.282383	Higher expr.	0
DLBC	ARL6IP5	DFI	1.16945	0.89863	0.898529	Higher expr.	0
DLBC	CHAC1	OS	1.31366	0.721042	0.720215	Higher expr.	0
DLBC	CHAC1	PFS	0.718542	0.560989	0.559331	Lower expr.	0
DLBC	CHAC1	DSS	0.405677	0.434679	0.419119	Lower expr.	0
DLBC	CHAC1	DFI	1.55169e-10	0.999455	0.0359264	Lower expr.	0
DLBC	CHAC2	OS	0.888379	0.873538	0.873471	Lower expr.	0
DLBC	CHAC2	PFS	1.52166	0.444948	0.441974	Higher expr.	0
DLBC	CHAC2	DSS	0.526343	0.581399	0.575177	Lower expr.	0
DLBC	CHAC2	DFI	2.61e-09	0.999385	0.445009	Lower expr.	0
DLBC	CTNS	OS	0.908776	0.893178	0.893139	Lower expr.	0
DLBC	CTNS	PFS	1.03826	0.942872	0.942869	Higher expr.	0
DLBC	CTNS	DSS	1.42617e+09	0.999174	0.0652957	Higher expr.	0
DLBC	CTNS	DFI	1.18535	0.892666	0.892558	Higher expr.	0
DLBC	DPEP1	OS	1.25	0.760543	0.760068	Higher expr.	0
DLBC	DPEP1	PFS	1.10348	0.85308	0.853024	Higher expr.	0
DLBC	DPEP1	DSS	0.711115	0.734651	0.733454	Lower expr.	0
DLBC	DPEP1	DFI	7.94555e+08	0.999421	0.319985	Higher expr.	0
DLBC	ETHE1	OS	2.43013	0.283016	0.268331	Higher expr.	0
DLBC	ETHE1	PFS	0.877121	0.806805	0.806689	Lower expr.	0
DLBC	ETHE1	DSS	1.47016e+09	0.999166	0.0582767	Higher expr.	0
DLBC	ETHE1	DFI	0.762685	0.830267	0.829832	Lower expr.	0
DLBC	G6PD	OS	0.794047	0.744666	0.744124	Lower expr.	0
DLBC	G6PD	PFS	0.899785	0.839122	0.83905	Lower expr.	0
DLBC	G6PD	DSS	0.328564	0.335482	0.310897	Lower expr.	0
DLBC	G6PD	DFI	1.55809	0.719854	0.717771	Higher expr.	0
DLBC	GCLC	OS	1.12592	0.869884	0.869816	Higher expr.	0
DLBC	GCLC	PFS	1.30763	0.612666	0.611714	Higher expr.	0
DLBC	GCLC	DSS	0.821348	0.844008	0.843759	Lower expr.	0
DLBC	GCLC	DFI	3.56917	0.309397	0.281538	Higher expr.	0
DLBC	GCLM	OS	1.24198	0.763993	0.763583	Higher expr.	0
DLBC	GCLM	PFS	1.52159	0.427887	0.424861	Higher expr.	0
DLBC	GCLM	DSS	0.98292	0.986264	0.986264	Lower expr.	0
DLBC	GCLM	DFI	1.16945	0.89863	0.898529	Higher expr.	0
DLBC	GGT1	OS	2.73626	0.220573	0.20222	Higher expr.	0
DLBC	GGT1	PFS	0.852534	0.76146	0.761234	Lower expr.	0
DLBC	GGT1	DSS	0.778905	0.804344	0.803869	Lower expr.	0
DLBC	GGT1	DFI	0.772117	0.836224	0.835823	Lower expr.	0
DLBC	GGT3P	OS	6.81011	0.0736977	0.0386906	Higher expr.	0
DLBC	GGT3P	PFS	1.68639	0.327516	0.322377	Higher expr.	0
DLBC	GGT3P	DSS	2.61664	0.408409	0.391211	Higher expr.	0
DLBC	GGT3P	DFI	9.23212e-10	0.999336	0.192897	Lower expr.	0
DLBC	GGT5	OS	1.21166	0.796797	0.796521	Higher expr.	0
DLBC	GGT5	PFS	0.486669	0.183594	0.175516	Lower expr.	0
DLBC	GGT5	DSS	2.37507	0.456342	0.442773	Higher expr.	0
DLBC	GGT5	DFI	0.258213	0.277313	0.245404	Lower expr.	0
DLBC	GGT6	OS	2.14986	0.299035	0.287914	Higher expr.	0
DLBC	GGT6	PFS	0.854556	0.768624	0.768409	Lower expr.	0
DLBC	GGT6	DSS	4.33768	0.211801	0.17681	Higher expr.	0
DLBC	GGT6	DFI	1.17147e-09	0.999407	0.293725	Lower expr.	0
DLBC	GGT7	OS	1.91739	0.386945	0.379677	Higher expr.	0
DLBC	GGT7	PFS	1.80276	0.275141	0.269013	Higher expr.	0
DLBC	GGT7	DSS	1.28969e+09	0.999178	0.0779325	Higher expr.	0
DLBC	GGT7	DFI	2.90807	0.400289	0.382535	Higher expr.	0
DLBC	GGTLC1	OS	0.771091	0.72132	0.720674	Lower expr.	0
DLBC	GGTLC1	PFS	0.370684	0.0802992	0.0706441	Lower expr.	0
DLBC	GGTLC1	DSS	0.852964	0.87513	0.875008	Lower expr.	0
DLBC	GGTLC1	DFI	0.243325	0.253791	0.218096	Lower expr.	0
DLBC	GGTLC2	OS	3.38037	0.13662	0.113919	Higher expr.	0
DLBC	GGTLC2	PFS	1.46414	0.464585	0.461977	Higher expr.	0
DLBC	GGTLC2	DSS	3.76261	0.251387	0.217782	Higher expr.	0
DLBC	GGTLC2	DFI	0.993304	0.995671	0.995671	Lower expr.	0
DLBC	GLO1	OS	2.00008	0.343509	0.333999	Higher expr.	0
DLBC	GLO1	PFS	1.82188	0.259825	0.253083	Higher expr.	0
DLBC	GLO1	DSS	3.55391	0.272244	0.240861	Higher expr.	0
DLBC	GLO1	DFI	1.27415	0.843742	0.843372	Higher expr.	0
DLBC	GLRX2	OS	1.57026	0.544448	0.541317	Higher expr.	0
DLBC	GLRX2	PFS	1.35776	0.571063	0.569734	Higher expr.	0
DLBC	GLRX2	DSS	1.35805	0.761036	0.760163	Higher expr.	0
DLBC	GLRX2	DFI	1.00674	0.995671	0.995671	Higher expr.	0
DLBC	GPX1	OS	0.757117	0.699795	0.698954	Lower expr.	0
DLBC	GPX1	PFS	0.484181	0.178571	0.17021	Lower expr.	0
DLBC	GPX1	DSS	0.925608	0.938598	0.938583	Lower expr.	0
DLBC	GPX1	DFI	1.00674	0.995671	0.995671	Higher expr.	0
DLBC	GPX4	OS	0.430567	0.259384	0.246889	Lower expr.	0
DLBC	GPX4	PFS	0.629857	0.381983	0.378182	Lower expr.	0
DLBC	GPX4	DSS	0.865781	0.885596	0.885499	Lower expr.	0
DLBC	GPX4	DFI	8.45142e+08	0.999384	0.275922	Higher expr.	0
DLBC	GSR	OS	0.709534	0.643802	0.642284	Lower expr.	0
DLBC	GSR	PFS	1.09524	0.863506	0.863464	Higher expr.	0
DLBC	GSR	DSS	0.955937	0.964086	0.964083	Lower expr.	0
DLBC	GSR	DFI	1.07696	0.952012	0.952001	Higher expr.	0
DLBC	GSS	OS	0.937702	0.929592	0.929582	Lower expr.	0
DLBC	GSS	PFS	1.44794	0.494994	0.492878	Higher expr.	0
DLBC	GSS	DSS	1.21141	0.848593	0.84837	Higher expr.	0
DLBC	GSS	DFI	1.18535	0.892666	0.892558	Higher expr.	0
DLBC	GSTA1	OS	1.80189	0.421301	0.414673	Higher expr.	0
DLBC	GSTA1	PFS	1.42174	0.524861	0.52283	Higher expr.	0
DLBC	GSTA1	DSS	2.54491	0.350428	0.333038	Higher expr.	0
DLBC	GSTA1	DFI	4.76659	0.216311	0.180952	Higher expr.	0
DLBC	GSTA2	OS	0.900851	0.922465	0.92243	Lower expr.	0
DLBC	GSTA2	PFS	0.40175	0.379529	0.363235	Lower expr.	0
DLBC	GSTA2	DSS	4.42151e-09	0.999186	0.425287	Lower expr.	0
DLBC	GSTA2	DFI	3.90399e-09	0.999259	0.44422	Lower expr.	0
DLBC	GSTA4	OS	1.94481	0.36365	0.354967	Higher expr.	0
DLBC	GSTA4	PFS	1.79321	0.268421	0.261701	Higher expr.	0
DLBC	GSTA4	DSS	0.968888	0.974963	0.974962	Lower expr.	0
DLBC	GSTA4	DFI	1.83196e+09	0.99927	0.0671252	Higher expr.	0
DLBC	GSTK1	OS	0.726713	0.657649	0.656394	Lower expr.	0
DLBC	GSTK1	PFS	0.474189	0.164137	0.155284	Lower expr.	0
DLBC	GSTK1	DSS	0.316989	0.319892	0.293634	Lower expr.	0
DLBC	GSTK1	DFI	1.64992	0.69274	0.690235	Higher expr.	0
DLBC	GSTM1	OS	1.30413	0.707601	0.706787	Higher expr.	0
DLBC	GSTM1	PFS	0.952783	0.927215	0.927208	Lower expr.	0
DLBC	GSTM1	DSS	1.25248	0.822002	0.821633	Higher expr.	0
DLBC	GSTM1	DFI	1.13564e-09	0.99937	0.255708	Lower expr.	0
DLBC	GSTM2	OS	1.30413	0.707601	0.706787	Higher expr.	0
DLBC	GSTM2	PFS	0.952783	0.927215	0.927208	Lower expr.	0
DLBC	GSTM2	DSS	1.25248	0.822002	0.821633	Higher expr.	0
DLBC	GSTM2	DFI	1.13564e-09	0.99937	0.255708	Lower expr.	0
DLBC	GSTM3	OS	0.628986	0.546014	0.542529	Lower expr.	0
DLBC	GSTM3	PFS	0.250593	0.0370021	0.0246131	Lower expr.	0
DLBC	GSTM3	DSS	0.91464	0.92923	0.929207	Lower expr.	0
DLBC	GSTM3	DFI	3.22846e-10	0.999424	0.0680438	Lower expr.	0
DLBC	GSTM4	OS	0.646608	0.572718	0.569869	Lower expr.	0
DLBC	GSTM4	PFS	0.360922	0.101534	0.0893172	Lower expr.	0
DLBC	GSTM4	DSS	0.852964	0.87513	0.875008	Lower expr.	0
DLBC	GSTM4	DFI	1.19531e-10	0.999497	0.022427	Lower expr.	0
DLBC	GSTM5	OS	1.67667	0.483253	0.478649	Higher expr.	0
DLBC	GSTM5	PFS	0.929256	0.889024	0.889001	Lower expr.	0
DLBC	GSTM5	DSS	3.15065	0.322823	0.297469	Higher expr.	0
DLBC	GSTM5	DFI	0.429133	0.498559	0.487324	Lower expr.	0
DLBC	GSTO1	OS	0.414699	0.237768	0.224222	Lower expr.	0
DLBC	GSTO1	PFS	0.33628	0.0510469	0.0414469	Lower expr.	0
DLBC	GSTO1	DSS	0.817402	0.840355	0.84009	Lower expr.	0
DLBC	GSTO1	DFI	0.92854	0.952012	0.952001	Lower expr.	0
DLBC	GSTO2	OS	1.57218	0.538628	0.535313	Higher expr.	0
DLBC	GSTO2	PFS	1.10736	0.844422	0.844357	Higher expr.	0
DLBC	GSTO2	DSS	2.10367	0.523574	0.514479	Higher expr.	0
DLBC	GSTO2	DFI	1.26347e+09	0.999298	0.138223	Higher expr.	0
DLBC	GSTP1	OS	1.46467	0.603726	0.601615	Higher expr.	0
DLBC	GSTP1	PFS	1.16781	0.767396	0.767184	Higher expr.	0
DLBC	GSTP1	DSS	2.29783	0.471719	0.459014	Higher expr.	0
DLBC	GSTP1	DFI	3.66679	0.300829	0.27275	Higher expr.	0
DLBC	GSTT1	OS	0.756176	0.700944	0.700142	Lower expr.	0
DLBC	GSTT1	PFS	0.491644	0.190225	0.182319	Lower expr.	0
DLBC	GSTT1	DSS	2.72575	0.389354	0.370623	Higher expr.	0
DLBC	GSTT1	DFI	2.45083e-10	0.999317	0.0166928	Lower expr.	0
DLBC	GSTT2	OS	2.00773	0.340498	0.330832	Higher expr.	0
DLBC	GSTT2	PFS	1.09703	0.858212	0.858163	Higher expr.	0
DLBC	GSTT2	DSS	3.0383	0.336216	0.311702	Higher expr.	0
DLBC	GSTT2	DFI	2.41796	0.474304	0.460605	Higher expr.	0
DLBC	GSTT4	OS	1.32358e-08	0.998767	0.459027	Lower expr.	0
DLBC	GSTT4	PFS	1.31489e-08	0.998298	0.305466	Lower expr.	0
DLBC	GSTT4	DSS	1.31087e-08	0.9991	0.587151	Lower expr.	0
DLBC	GSTT4	DFI	1.15584e-08	0.999321	0.665006	Lower expr.	0
DLBC	GSTZ1	OS	0.698625	0.618092	0.616345	Lower expr.	0
DLBC	GSTZ1	PFS	0.583945	0.307057	0.301721	Lower expr.	0
DLBC	GSTZ1	DSS	0.842043	0.86363	0.863465	Lower expr.	0
DLBC	GSTZ1	DFI	0.855101	0.89863	0.898529	Lower expr.	0
DLBC	HAGH	OS	0.405838	0.223228	0.208866	Lower expr.	0
DLBC	HAGH	PFS	0.596869	0.325572	0.320601	Lower expr.	0
DLBC	HAGH	DSS	0.583505	0.600911	0.597099	Lower expr.	0
DLBC	HAGH	DFI	0.762685	0.830267	0.829832	Lower expr.	0
DLBC	HPGDS	OS	1.60564	0.524712	0.521156	Higher expr.	0
DLBC	HPGDS	PFS	1.11452	0.838005	0.837936	Higher expr.	0
DLBC	HPGDS	DSS	1.29431	0.79659	0.796041	Higher expr.	0
DLBC	HPGDS	DFI	0.386714	0.461812	0.449999	Lower expr.	0
DLBC	IDH1	OS	1.78485	0.430103	0.423865	Higher expr.	0
DLBC	IDH1	PFS	2.124	0.171035	0.161358	Higher expr.	0
DLBC	IDH1	DSS	1.21744	0.844882	0.844643	Higher expr.	0
DLBC	IDH1	DFI	3.28388	0.354337	0.333425	Higher expr.	0
DLBC	MGST2	OS	0.737492	0.675435	0.674408	Lower expr.	0
DLBC	MGST2	PFS	0.4583	0.155328	0.146874	Lower expr.	0
DLBC	MGST2	DSS	0.825151	0.849337	0.849123	Lower expr.	0
DLBC	MGST2	DFI	0.762685	0.830267	0.829832	Lower expr.	0
DLBC	MMACHC	OS	0.674186	0.589886	0.587498	Lower expr.	0
DLBC	MMACHC	PFS	0.994745	0.991949	0.991949	Lower expr.	0
DLBC	MMACHC	DSS	1.08217	0.937079	0.937062	Higher expr.	0
DLBC	MMACHC	DFI	0.843634	0.892666	0.892558	Lower expr.	0
DLBC	NAT8	OS	0.72038	0.653732	0.652289	Lower expr.	0
DLBC	NAT8	PFS	0.789185	0.653808	0.653059	Lower expr.	0
DLBC	NAT8	DSS	1.14932	0.88933	0.889241	Higher expr.	0
DLBC	NAT8	DFI	0.553838	0.630307	0.625392	Lower expr.	0
DLBC	NFE2L2	OS	1.35091	0.676781	0.675732	Higher expr.	0
DLBC	NFE2L2	PFS	1.61101	0.367211	0.363149	Higher expr.	0
DLBC	NFE2L2	DSS	1.07102	0.945832	0.945822	Higher expr.	0
DLBC	NFE2L2	DFI	1.27415	0.843742	0.843372	Higher expr.	0
DLBC	OPLAH	OS	1.80491	0.420644	0.414063	Higher expr.	0
DLBC	OPLAH	PFS	1.61472	0.364399	0.359879	Higher expr.	0
DLBC	OPLAH	DSS	1.38776	0.743284	0.742178	Higher expr.	0
DLBC	OPLAH	DFI	0.862646	0.905965	0.905889	Lower expr.	0
DLBC	PARK7	OS	0.51182	0.372656	0.364844	Lower expr.	0
DLBC	PARK7	PFS	0.748943	0.587241	0.586114	Lower expr.	0
DLBC	PARK7	DSS	1.0804	0.938382	0.938367	Higher expr.	0
DLBC	PARK7	DFI	1.09156	0.944022	0.944006	Higher expr.	0
DLBC	SLC1A1	OS	1.0111	0.987599	0.987599	Higher expr.	0
DLBC	SLC1A1	PFS	0.873611	0.794582	0.794431	Lower expr.	0
DLBC	SLC1A1	DSS	0.430856	0.4666	0.453557	Lower expr.	0
DLBC	SLC1A1	DFI	0.482549	0.551981	0.543176	Lower expr.	0
DLBC	SLC1A2	OS	0.599877	0.48595	0.481323	Lower expr.	0
DLBC	SLC1A2	PFS	0.515196	0.227988	0.219752	Lower expr.	0
DLBC	SLC1A2	DSS	0.839848	0.861755	0.861583	Lower expr.	0
DLBC	SLC1A2	DFI	0.482549	0.551981	0.543176	Lower expr.	0
DLBC	SLC7A11	OS	0.548535	0.412129	0.405219	Lower expr.	0
DLBC	SLC7A11	PFS	0.328835	0.0571534	0.0454203	Lower expr.	0
DLBC	SLC7A11	DSS	0.329773	0.337228	0.312857	Lower expr.	0
DLBC	SLC7A11	DFI	6.75482e-10	0.999277	0.0994037	Lower expr.	0
DLBC	SOD1	OS	0.51398	0.363125	0.354403	Lower expr.	0
DLBC	SOD1	PFS	0.440404	0.134993	0.12442	Lower expr.	0
DLBC	SOD1	DSS	0.956338	0.964459	0.964457	Lower expr.	0
DLBC	SOD1	DFI	0.448018	0.513183	0.502026	Lower expr.	0
DLBC	SOD2	OS	0.3456	0.204574	0.183934	Lower expr.	0
DLBC	SOD2	PFS	0.217318	0.0242002	0.0142043	Lower expr.	0
DLBC	SOD2	DSS	0.898732	0.914978	0.914938	Lower expr.	0
DLBC	SOD2	DFI	0.471405	0.626692	0.622181	Lower expr.	0
ESCA	ARL6IP5	OS	0.667644	0.078664	0.0765897	Lower expr.	0
ESCA	ARL6IP5	PFS	0.867559	0.451061	0.451073	Lower expr.	0
ESCA	ARL6IP5	DSS	0.75477	0.312406	0.311259	Lower expr.	0
ESCA	ARL6IP5	DFI	1.4021	0.424252	0.422118	Higher expr.	0
ESCA	CHAC1	OS	1.06912	0.770974	0.771056	Higher expr.	0
ESCA	CHAC1	PFS	0.869992	0.45849	0.457927	Lower expr.	0
ESCA	CHAC1	DSS	0.890884	0.685251	0.685026	Lower expr.	0
ESCA	CHAC1	DFI	0.232431	0.0193886	0.0111344	Lower expr.	0
ESCA	CHAC2	OS	0.928322	0.743155	0.743098	Lower expr.	0
ESCA	CHAC2	PFS	1.09946	0.61375	0.612598	Higher expr.	0
ESCA	CHAC2	DSS	0.796631	0.4148	0.41431	Lower expr.	0
ESCA	CHAC2	DFI	1.81593	0.173551	0.167284	Higher expr.	0
ESCA	CTNS	OS	1.14886	0.545087	0.545231	Higher expr.	0
ESCA	CTNS	PFS	0.914512	0.635346	0.632577	Lower expr.	0
ESCA	CTNS	DSS	1.21197	0.498124	0.498021	Higher expr.	0
ESCA	CTNS	DFI	1.14592	0.750429	0.750245	Higher expr.	0
ESCA	DPEP1	OS	1.19466	0.434926	0.434401	Higher expr.	0
ESCA	DPEP1	PFS	1.15752	0.437345	0.436159	Higher expr.	0
ESCA	DPEP1	DSS	1.15952	0.598539	0.597495	Higher expr.	0
ESCA	DPEP1	DFI	0.983457	0.968949	0.968949	Lower expr.	0
ESCA	ETHE1	OS	0.850985	0.485059	0.486012	Lower expr.	0
ESCA	ETHE1	PFS	0.834728	0.340106	0.339385	Lower expr.	0
ESCA	ETHE1	DSS	0.656897	0.142578	0.140341	Lower expr.	0
ESCA	ETHE1	DFI	0.540033	0.181108	0.174935	Lower expr.	0
ESCA	G6PD	OS	1.15714	0.521913	0.521831	Higher expr.	0
ESCA	G6PD	PFS	1.2604	0.219431	0.217938	Higher expr.	0
ESCA	G6PD	DSS	1.44354	0.191449	0.189312	Higher expr.	0
ESCA	G6PD	DFI	1.62967	0.260199	0.255883	Higher expr.	0
ESCA	GCLC	OS	0.949055	0.819031	0.819123	Lower expr.	0
ESCA	GCLC	PFS	1.01172	0.950687	0.949671	Higher expr.	0
ESCA	GCLC	DSS	1.01604	0.954653	0.955426	Higher expr.	0
ESCA	GCLC	DFI	1.53787	0.344112	0.340479	Higher expr.	0
ESCA	GCLM	OS	1.32569	0.221854	0.220821	Higher expr.	0
ESCA	GCLM	PFS	1.20893	0.317536	0.316991	Higher expr.	0
ESCA	GCLM	DSS	1.38403	0.248245	0.246665	Higher expr.	0
ESCA	GCLM	DFI	1.92212	0.136382	0.130391	Higher expr.	0
ESCA	GGT1	OS	1.09019	0.704002	0.70288	Higher expr.	0
ESCA	GGT1	PFS	1.21788	0.294784	0.293843	Higher expr.	0
ESCA	GGT1	DSS	0.962476	0.891122	0.891818	Lower expr.	0
ESCA	GGT1	DFI	1.18157	0.696361	0.696028	Higher expr.	0
ESCA	GGT3P	OS	0.940352	0.78639	0.786942	Lower expr.	0
ESCA	GGT3P	PFS	0.972725	0.882928	0.883243	Lower expr.	0
ESCA	GGT3P	DSS	0.781028	0.382744	0.381446	Lower expr.	0
ESCA	GGT3P	DFI	0.968086	0.938559	0.938557	Lower expr.	0
ESCA	GGT5	OS	0.978561	0.924277	0.924157	Lower expr.	0
ESCA	GGT5	PFS	0.977575	0.904018	0.906631	Lower expr.	0
ESCA	GGT5	DSS	1.46993	0.17997	0.177111	Higher expr.	0
ESCA	GGT5	DFI	1.97605	0.123069	0.116319	Higher expr.	0
ESCA	GGT6	OS	1.07411	0.754853	0.754053	Higher expr.	0
ESCA	GGT6	PFS	1.29397	0.173557	0.173023	Higher expr.	0
ESCA	GGT6	DSS	0.931556	0.799989	0.799098	Lower expr.	0
ESCA	GGT6	DFI	1.48004	0.349112	0.346078	Higher expr.	0
ESCA	GGT7	OS	1.04626	0.843389	0.843349	Higher expr.	0
ESCA	GGT7	PFS	1.03769	0.844451	0.846503	Higher expr.	0
ESCA	GGT7	DSS	1.20549	0.503024	0.502976	Higher expr.	0
ESCA	GGT7	DFI	0.836285	0.672507	0.672109	Lower expr.	0
ESCA	GGTLC1	OS	1.55347	0.194909	0.192617	Higher expr.	0
ESCA	GGTLC1	PFS	1.61983	0.0829617	0.0802486	Higher expr.	0
ESCA	GGTLC1	DSS	1.73825	0.151795	0.147031	Higher expr.	0
ESCA	GGTLC1	DFI	2.13995	0.220014	0.209043	Higher expr.	0
ESCA	GGTLC2	OS	1.23981	0.346107	0.34395	Higher expr.	0
ESCA	GGTLC2	PFS	1.37193	0.0935792	0.0921218	Higher expr.	0
ESCA	GGTLC2	DSS	1.33285	0.304705	0.302601	Higher expr.	0
ESCA	GGTLC2	DFI	1.65886	0.23064	0.225782	Higher expr.	0
ESCA	GLO1	OS	1.81494	0.0106374	0.0095166	Higher expr.	0
ESCA	GLO1	PFS	1.54569	0.0228413	0.0217849	Higher expr.	0
ESCA	GLO1	DSS	2.0316	0.0145269	0.0125979	Higher expr.	0
ESCA	GLO1	DFI	1.29142	0.550556	0.549554	Higher expr.	0
ESCA	GLRX2	OS	1.27041	0.29383	0.291846	Higher expr.	0
ESCA	GLRX2	PFS	1.14012	0.484799	0.48212	Higher expr.	0
ESCA	GLRX2	DSS	1.19879	0.515458	0.51423	Higher expr.	0
ESCA	GLRX2	DFI	0.880154	0.762052	0.761898	Lower expr.	0
ESCA	GPX1	OS	0.723585	0.159391	0.157675	Lower expr.	0
ESCA	GPX1	PFS	0.778826	0.187133	0.187155	Lower expr.	0
ESCA	GPX1	DSS	0.743749	0.289569	0.288238	Lower expr.	0
ESCA	GPX1	DFI	0.963961	0.929955	0.929951	Lower expr.	0
ESCA	GPX4	OS	0.977912	0.922109	0.922498	Lower expr.	0
ESCA	GPX4	PFS	0.901327	0.582228	0.582744	Lower expr.	0
ESCA	GPX4	DSS	0.972997	0.922407	0.923162	Lower expr.	0
ESCA	GPX4	DFI	0.761107	0.516006	0.514755	Lower expr.	0
ESCA	GSR	OS	0.905582	0.664007	0.663226	Lower expr.	0
ESCA	GSR	PFS	0.867141	0.45029	0.448442	Lower expr.	0
ESCA	GSR	DSS	0.863889	0.605419	0.604343	Lower expr.	0
ESCA	GSR	DFI	0.648307	0.313494	0.309853	Lower expr.	0
ESCA	GSS	OS	1.02573	0.911075	0.910103	Higher expr.	0
ESCA	GSS	PFS	1.11778	0.553857	0.551617	Higher expr.	0
ESCA	GSS	DSS	0.935062	0.809663	0.810326	Lower expr.	0
ESCA	GSS	DFI	0.667831	0.346404	0.3432	Lower expr.	0
ESCA	GSTA1	OS	1.08274	0.728871	0.729271	Higher expr.	0
ESCA	GSTA1	PFS	1.06127	0.752354	0.750991	Higher expr.	0
ESCA	GSTA1	DSS	1.1902	0.534817	0.534898	Higher expr.	0
ESCA	GSTA1	DFI	1.23265	0.61723	0.616598	Higher expr.	0
ESCA	GSTA2	OS	1.18091	0.476638	0.47547	Higher expr.	0
ESCA	GSTA2	PFS	1.00806	0.966221	0.967736	Higher expr.	0
ESCA	GSTA2	DSS	1.17356	0.574773	0.575082	Higher expr.	0
ESCA	GSTA2	DFI	0.788604	0.592882	0.592087	Lower expr.	0
ESCA	GSTA3	OS	0.994215	0.983025	0.982917	Lower expr.	0
ESCA	GSTA3	PFS	1.10453	0.64686	0.647109	Higher expr.	0
ESCA	GSTA3	DSS	0.850882	0.63826	0.637512	Lower expr.	0
ESCA	GSTA3	DFI	1.58513	0.288835	0.28479	Higher expr.	0
ESCA	GSTA4	OS	1.08686	0.715347	0.715559	Higher expr.	0
ESCA	GSTA4	PFS	1.01383	0.941915	0.941339	Higher expr.	0
ESCA	GSTA4	DSS	1.14231	0.633177	0.633555	Higher expr.	0
ESCA	GSTA4	DFI	0.857018	0.711903	0.711631	Lower expr.	0
ESCA	GSTA5	OS	1.40416	0.636614	0.634543	Higher expr.	0
ESCA	GSTA5	PFS	1.5955	0.426994	0.423869	Higher expr.	0
ESCA	GSTA5	DSS	1.0923e-07	0.996291	0.380185	Lower expr.	0
ESCA	GSTK1	OS	0.916579	0.703165	0.70404	Lower expr.	0
ESCA	GSTK1	PFS	0.875763	0.481506	0.482041	Lower expr.	0
ESCA	GSTK1	DSS	0.845519	0.54883	0.548923	Lower expr.	0
ESCA	GSTK1	DFI	0.736123	0.474712	0.473017	Lower expr.	0
ESCA	GSTM1	OS	0.88207	0.594629	0.593848	Lower expr.	0
ESCA	GSTM1	PFS	0.608566	0.00992842	0.00925215	Lower expr.	0
ESCA	GSTM1	DSS	0.833382	0.539041	0.537798	Lower expr.	0
ESCA	GSTM1	DFI	0.329991	0.0160288	0.011668	Lower expr.	0
ESCA	GSTM2	OS	0.960728	0.86078	0.860222	Lower expr.	0
ESCA	GSTM2	PFS	0.917534	0.648909	0.648272	Lower expr.	0
ESCA	GSTM2	DSS	1.10752	0.713566	0.714105	Higher expr.	0
ESCA	GSTM2	DFI	1.29037	0.552727	0.551684	Higher expr.	0
ESCA	GSTM3	OS	1.09114	0.703142	0.702824	Higher expr.	0
ESCA	GSTM3	PFS	1.01258	0.947171	0.948658	Higher expr.	0
ESCA	GSTM3	DSS	1.29955	0.348366	0.347435	Higher expr.	0
ESCA	GSTM3	DFI	1.16689	0.714417	0.71415	Higher expr.	0
ESCA	GSTM4	OS	1.07075	0.763767	0.764152	Higher expr.	0
ESCA	GSTM4	PFS	1.08463	0.665256	0.666302	Higher expr.	0
ESCA	GSTM4	DSS	0.918618	0.760227	0.759386	Lower expr.	0
ESCA	GSTM4	DFI	1.38131	0.443368	0.441409	Higher expr.	0
ESCA	GSTM5	OS	1.3056	0.245616	0.245204	Higher expr.	0
ESCA	GSTM5	PFS	1.10918	0.583588	0.583074	Higher expr.	0
ESCA	GSTM5	DSS	1.72705	0.0588444	0.0561161	Higher expr.	0
ESCA	GSTM5	DFI	1.5353	0.317964	0.314365	Higher expr.	0
ESCA	GSTO1	OS	1.36219	0.176299	0.175081	Higher expr.	0
ESCA	GSTO1	PFS	1.06081	0.754576	0.75527	Higher expr.	0
ESCA	GSTO1	DSS	1.31853	0.322111	0.321067	Higher expr.	0
ESCA	GSTO1	DFI	0.748733	0.491639	0.490198	Lower expr.	0
ESCA	GSTO2	OS	1.0903	0.703113	0.702568	Higher expr.	0
ESCA	GSTO2	PFS	1.24236	0.248198	0.247804	Higher expr.	0
ESCA	GSTO2	DSS	0.948805	0.850381	0.851098	Lower expr.	0
ESCA	GSTO2	DFI	0.677502	0.376172	0.373247	Lower expr.	0
ESCA	GSTP1	OS	1.08432	0.72449	0.72491	Higher expr.	0
ESCA	GSTP1	PFS	1.19054	0.355317	0.355178	Higher expr.	0
ESCA	GSTP1	DSS	1.13718	0.644699	0.645113	Higher expr.	0
ESCA	GSTP1	DFI	1.27032	0.576455	0.575559	Higher expr.	0
ESCA	GSTT1	OS	0.817244	0.390284	0.388873	Lower expr.	0
ESCA	GSTT1	PFS	0.789792	0.217777	0.216161	Lower expr.	0
ESCA	GSTT1	DSS	0.781175	0.389449	0.388305	Lower expr.	0
ESCA	GSTT1	DFI	0.597261	0.248839	0.244199	Lower expr.	0
ESCA	GSTT2	OS	1.15519	0.526247	0.526677	Higher expr.	0
ESCA	GSTT2	PFS	1.11276	0.569088	0.568753	Higher expr.	0
ESCA	GSTT2	DSS	1.73897	0.059487	0.0564779	Higher expr.	0
ESCA	GSTT2	DFI	1.57499	0.299965	0.295844	Higher expr.	0
ESCA	GSTT4	OS	0.730724	0.303378	0.300295	Lower expr.	0
ESCA	GSTT4	PFS	1.09074	0.701687	0.70371	Higher expr.	0
ESCA	GSTT4	DSS	0.759575	0.43588	0.433421	Lower expr.	0
ESCA	GSTT4	DFI	1.82986	0.167995	0.16162	Higher expr.	0
ESCA	GSTZ1	OS	0.702181	0.125157	0.122986	Lower expr.	0
ESCA	GSTZ1	PFS	0.837601	0.346516	0.344586	Lower expr.	0
ESCA	GSTZ1	DSS	0.821345	0.480125	0.478784	Lower expr.	0
ESCA	GSTZ1	DFI	1.21719	0.654073	0.653557	Higher expr.	0
ESCA	HAGH	OS	1.35793	0.182461	0.180984	Higher expr.	0
ESCA	HAGH	PFS	1.43456	0.0571936	0.0560313	Higher expr.	0
ESCA	HAGH	DSS	1.2945	0.362454	0.361727	Higher expr.	0
ESCA	HAGH	DFI	2.31278	0.0574994	0.0515211	Higher expr.	0
ESCA	HPGDS	OS	1.17005	0.492024	0.491946	Higher expr.	0
ESCA	HPGDS	PFS	1.36356	0.0995495	0.0982888	Higher expr.	0
ESCA	HPGDS	DSS	1.68413	0.0703421	0.0676027	Higher expr.	0
ESCA	HPGDS	DFI	4.62581	0.00198547	0.000811522	Higher expr.	0
ESCA	IDH1	OS	0.961332	0.863057	0.864261	Lower expr.	0
ESCA	IDH1	PFS	1.06516	0.737486	0.736769	Higher expr.	0
ESCA	IDH1	DSS	0.848023	0.556779	0.556286	Lower expr.	0
ESCA	IDH1	DFI	1.51264	0.326522	0.323132	Higher expr.	0
ESCA	MGST2	OS	1.3277	0.216739	0.214813	Higher expr.	0
ESCA	MGST2	PFS	1.16783	0.410254	0.409713	Higher expr.	0
ESCA	MGST2	DSS	1.22801	0.461443	0.460675	Higher expr.	0
ESCA	MGST2	DFI	0.780847	0.572684	0.571714	Lower expr.	0
ESCA	MMACHC	OS	0.864489	0.525099	0.525119	Lower expr.	0
ESCA	MMACHC	PFS	0.790664	0.212897	0.212338	Lower expr.	0
ESCA	MMACHC	DSS	0.656564	0.143387	0.140885	Lower expr.	0
ESCA	MMACHC	DFI	0.287368	0.0142772	0.00919468	Lower expr.	0
ESCA	NAT8	OS	1.70418	0.0231779	0.0216818	Higher expr.	0
ESCA	NAT8	PFS	1.37167	0.0974832	0.0964256	Higher expr.	0
ESCA	NAT8	DSS	1.29902	0.347427	0.346551	Higher expr.	0
ESCA	NAT8	DFI	1.76156	0.178636	0.172911	Higher expr.	0
ESCA	NFE2L2	OS	1.12407	0.612742	0.612895	Higher expr.	0
ESCA	NFE2L2	PFS	1.23743	0.262485	0.261364	Higher expr.	0
ESCA	NFE2L2	DSS	1.48357	0.165663	0.163428	Higher expr.	0
ESCA	NFE2L2	DFI	2.3007	0.0740864	0.0671223	Higher expr.	0
ESCA	OPLAH	OS	1.36077	0.175928	0.173885	Higher expr.	0
ESCA	OPLAH	PFS	1.53895	0.0230787	0.0221051	Higher expr.	0
ESCA	OPLAH	DSS	0.898472	0.705925	0.705685	Lower expr.	0
ESCA	OPLAH	DFI	2.17005	0.0665692	0.0601558	Higher expr.	0
ESCA	PARK7	OS	1.23392	0.357785	0.356938	Higher expr.	0
ESCA	PARK7	PFS	1.11296	0.570834	0.568395	Higher expr.	0
ESCA	PARK7	DSS	1.23015	0.457717	0.456291	Higher expr.	0
ESCA	PARK7	DFI	0.694668	0.387164	0.384564	Lower expr.	0
ESCA	SLC1A1	OS	0.970249	0.896445	0.897034	Lower expr.	0
ESCA	SLC1A1	PFS	0.91339	0.634797	0.634389	Lower expr.	0
ESCA	SLC1A1	DSS	0.938347	0.822402	0.822297	Lower expr.	0
ESCA	SLC1A1	DFI	0.949234	0.905861	0.905851	Lower expr.	0
ESCA	SLC1A2	OS	0.800006	0.331084	0.329493	Lower expr.	0
ESCA	SLC1A2	PFS	0.781094	0.192123	0.191301	Lower expr.	0
ESCA	SLC1A2	DSS	0.859125	0.58515	0.584753	Lower expr.	0
ESCA	SLC1A2	DFI	0.872911	0.745511	0.745326	Lower expr.	0
ESCA	SLC7A11	OS	1.32126	0.228774	0.227755	Higher expr.	0
ESCA	SLC7A11	PFS	1.29036	0.178583	0.176721	Higher expr.	0
ESCA	SLC7A11	DSS	1.30298	0.346369	0.345447	Higher expr.	0
ESCA	SLC7A11	DFI	1.37333	0.448389	0.446512	Higher expr.	0
ESCA	SOD1	OS	0.848426	0.473487	0.473525	Lower expr.	0
ESCA	SOD1	PFS	1.16201	0.426858	0.428241	Higher expr.	0
ESCA	SOD1	DSS	0.65462	0.139104	0.13593	Lower expr.	0
ESCA	SOD1	DFI	1.75561	0.200301	0.194538	Higher expr.	0
ESCA	SOD2	OS	1.00744	0.974033	0.974172	Higher expr.	0
ESCA	SOD2	PFS	0.711517	0.0741349	0.0734691	Lower expr.	0
ESCA	SOD2	DSS	1.30847	0.336802	0.334853	Higher expr.	0
ESCA	SOD2	DFI	0.702465	0.406391	0.404108	Lower expr.	0
GBM	ARL6IP5	OS	0.998541	0.99331	0.997836	Lower expr.	0
GBM	ARL6IP5	PFS	1.38755	0.049003	0.0467496	Higher expr.	0
GBM	ARL6IP5	DSS	1.05202	0.784621	0.774453	Higher expr.	0
GBM	CHAC1	OS	1.39225	0.0607842	0.0626798	Higher expr.	0
GBM	CHAC1	PFS	1.11006	0.530982	0.532692	Higher expr.	0
GBM	CHAC1	DSS	1.38398	0.0836612	0.0866486	Higher expr.	0
GBM	CHAC2	OS	0.75523	0.110197	0.111906	Lower expr.	0
GBM	CHAC2	PFS	0.823903	0.248234	0.251018	Lower expr.	0
GBM	CHAC2	DSS	0.770906	0.163831	0.167688	Lower expr.	0
GBM	CTNS	OS	1.30254	0.129851	0.123605	Higher expr.	0
GBM	CTNS	PFS	1.25646	0.173121	0.169819	Higher expr.	0
GBM	CTNS	DSS	1.27163	0.195429	0.186631	Higher expr.	0
GBM	DPEP1	OS	0.740433	0.0831773	0.080578	Lower expr.	0
GBM	DPEP1	PFS	0.693696	0.0294393	0.0289871	Lower expr.	0
GBM	DPEP1	DSS	0.726887	0.0830457	0.0805286	Lower expr.	0
GBM	ETHE1	OS	1.02208	0.900426	0.891512	Higher expr.	0
GBM	ETHE1	PFS	1.1432	0.421341	0.417966	Higher expr.	0
GBM	ETHE1	DSS	0.977352	0.901906	0.9109	Lower expr.	0
GBM	G6PD	OS	1.41205	0.0484573	0.0475526	Higher expr.	0
GBM	G6PD	PFS	1.60511	0.00517302	0.00469218	Higher expr.	0
GBM	G6PD	DSS	1.45453	0.0443233	0.0431223	Higher expr.	0
GBM	GCLC	OS	0.950936	0.771634	0.776148	Lower expr.	0
GBM	GCLC	PFS	0.972269	0.865353	0.860954	Lower expr.	0
GBM	GCLC	DSS	0.981503	0.919244	0.92403	Lower expr.	0
GBM	GCLM	OS	1.19055	0.319438	0.32218	Higher expr.	0
GBM	GCLM	PFS	1.19159	0.291002	0.291068	Higher expr.	0
GBM	GCLM	DSS	1.20698	0.312442	0.31525	Higher expr.	0
GBM	GGT1	OS	1.11696	0.523371	0.509986	Higher expr.	0
GBM	GGT1	PFS	1.11197	0.523161	0.516016	Higher expr.	0
GBM	GGT1	DSS	1.11571	0.551702	0.537335	Higher expr.	0
GBM	GGT3P	OS	1.3435	0.0942857	0.0985043	Higher expr.	0
GBM	GGT3P	PFS	1.03131	0.854242	0.859795	Higher expr.	0
GBM	GGT3P	DSS	1.28912	0.173186	0.18204	Higher expr.	0
GBM	GGT5	OS	1.16219	0.39017	0.388265	Higher expr.	0
GBM	GGT5	PFS	1.16998	0.349527	0.352896	Higher expr.	0
GBM	GGT5	DSS	1.12738	0.519053	0.516701	Higher expr.	0
GBM	GGT6	OS	1.41376	0.0661522	0.0642816	Higher expr.	0
GBM	GGT6	PFS	1.142	0.464841	0.461108	Higher expr.	0
GBM	GGT6	DSS	1.41359	0.0864424	0.0844814	Higher expr.	0
GBM	GGT7	OS	1.19289	0.310327	0.311682	Higher expr.	0
GBM	GGT7	PFS	1.24078	0.196685	0.196045	Higher expr.	0
GBM	GGT7	DSS	1.24059	0.241951	0.242849	Higher expr.	0
GBM	GGTLC1	OS	0.585997	0.201705	0.1922	Lower expr.	0
GBM	GGTLC1	PFS	0.841862	0.617881	0.617605	Lower expr.	0
GBM	GGTLC1	DSS	0.620633	0.25612	0.246685	Lower expr.	0
GBM	GGTLC2	OS	0.985123	0.931059	0.94461	Lower expr.	0
GBM	GGTLC2	PFS	0.928727	0.657596	0.659243	Lower expr.	0
GBM	GGTLC2	DSS	0.956047	0.806969	0.820709	Lower expr.	0
GBM	GLO1	OS	0.787567	0.171423	0.169744	Lower expr.	0
GBM	GLO1	PFS	0.936377	0.693748	0.698557	Lower expr.	0
GBM	GLO1	DSS	0.76701	0.151364	0.149702	Lower expr.	0
GBM	GLRX2	OS	1.24411	0.210079	0.204048	Higher expr.	0
GBM	GLRX2	PFS	1.1729	0.336611	0.331101	Higher expr.	0
GBM	GLRX2	DSS	1.23091	0.261704	0.254505	Higher expr.	0
GBM	GPX1	OS	1.20456	0.286105	0.280095	Higher expr.	0
GBM	GPX1	PFS	1.46232	0.022808	0.0212995	Higher expr.	0
GBM	GPX1	DSS	1.22867	0.268659	0.262319	Higher expr.	0
GBM	GPX4	OS	1.09787	0.592232	0.584368	Higher expr.	0
GBM	GPX4	PFS	1.20892	0.258608	0.254318	Higher expr.	0
GBM	GPX4	DSS	1.05989	0.753589	0.743546	Higher expr.	0
GBM	GSR	OS	0.93237	0.689782	0.691398	Lower expr.	0
GBM	GSR	PFS	1.26088	0.164539	0.163803	Higher expr.	0
GBM	GSR	DSS	0.923663	0.669229	0.670849	Lower expr.	0
GBM	GSS	OS	1.21225	0.269564	0.264523	Higher expr.	0
GBM	GSS	PFS	1.52138	0.0116712	0.0110362	Higher expr.	0
GBM	GSS	DSS	1.16472	0.409893	0.403907	Higher expr.	0
GBM	GSTA1	OS	0.879098	0.507533	0.510117	Lower expr.	0
GBM	GSTA1	PFS	1.08884	0.648899	0.645959	Higher expr.	0
GBM	GSTA1	DSS	0.884056	0.542787	0.545705	Lower expr.	0
GBM	GSTA2	OS	1.52822	0.277678	0.272063	Higher expr.	0
GBM	GSTA2	PFS	1.76657	0.120024	0.115608	Higher expr.	0
GBM	GSTA2	DSS	1.42518	0.400526	0.395584	Higher expr.	0
GBM	GSTA3	OS	1.94138	0.0713513	0.0652886	Higher expr.	0
GBM	GSTA3	PFS	1.84081	0.0994132	0.0965183	Higher expr.	0
GBM	GSTA3	DSS	1.71906	0.198995	0.191394	Higher expr.	0
GBM	GSTA4	OS	0.82226	0.259161	0.268093	Lower expr.	0
GBM	GSTA4	PFS	0.828784	0.260148	0.264082	Lower expr.	0
GBM	GSTA4	DSS	0.799487	0.224538	0.233234	Lower expr.	0
GBM	GSTK1	OS	1.0715	0.692496	0.681378	Higher expr.	0
GBM	GSTK1	PFS	1.24217	0.192849	0.187473	Higher expr.	0
GBM	GSTK1	DSS	1.08471	0.662194	0.649253	Higher expr.	0
GBM	GSTM1	OS	1.31555	0.119361	0.126446	Higher expr.	0
GBM	GSTM1	PFS	1.46762	0.0230943	0.0231191	Higher expr.	0
GBM	GSTM1	DSS	1.49209	0.0337136	0.0356048	Higher expr.	0
GBM	GSTM2	OS	0.946196	0.752996	0.758715	Lower expr.	0
GBM	GSTM2	PFS	1.07133	0.679954	0.68004	Higher expr.	0
GBM	GSTM2	DSS	0.91587	0.637318	0.64382	Lower expr.	0
GBM	GSTM3	OS	1.25301	0.197639	0.190263	Higher expr.	0
GBM	GSTM3	PFS	1.11877	0.500607	0.493383	Higher expr.	0
GBM	GSTM3	DSS	1.22794	0.269087	0.259843	Higher expr.	0
GBM	GSTM4	OS	0.97312	0.875661	0.893867	Lower expr.	0
GBM	GSTM4	PFS	1.16857	0.348333	0.341703	Higher expr.	0
GBM	GSTM4	DSS	0.970975	0.873375	0.893217	Lower expr.	0
GBM	GSTM5	OS	1.27751	0.161808	0.158493	Higher expr.	0
GBM	GSTM5	PFS	0.863564	0.381755	0.378472	Lower expr.	0
GBM	GSTM5	DSS	1.26534	0.205681	0.201621	Higher expr.	0
GBM	GSTO1	OS	1.25815	0.187262	0.180643	Higher expr.	0
GBM	GSTO1	PFS	1.31445	0.101799	0.0984885	Higher expr.	0
GBM	GSTO1	DSS	1.35696	0.0995244	0.094185	Higher expr.	0
GBM	GSTO2	OS	0.903385	0.563064	0.577215	Lower expr.	0
GBM	GSTO2	PFS	0.909555	0.568052	0.572034	Lower expr.	0
GBM	GSTO2	DSS	0.990921	0.961252	0.980422	Lower expr.	0
GBM	GSTP1	OS	1.20376	0.28508	0.274062	Higher expr.	0
GBM	GSTP1	PFS	1.18516	0.306258	0.302167	Higher expr.	0
GBM	GSTP1	DSS	1.24605	0.233274	0.222184	Higher expr.	0
GBM	GSTT1	OS	0.85879	0.379817	0.374951	Lower expr.	0
GBM	GSTT1	PFS	1.00989	0.952731	0.956267	Higher expr.	0
GBM	GSTT1	DSS	0.845392	0.361854	0.357414	Lower expr.	0
GBM	GSTT2	OS	0.829946	0.284848	0.286306	Lower expr.	0
GBM	GSTT2	PFS	1.01896	0.909877	0.911735	Higher expr.	0
GBM	GSTT2	DSS	0.794352	0.212975	0.213402	Lower expr.	0
GBM	GSTT4	OS	1.42316	0.335526	0.333798	Higher expr.	0
GBM	GSTT4	PFS	1.12921	0.739152	0.737171	Higher expr.	0
GBM	GSTT4	DSS	1.53087	0.247586	0.244439	Higher expr.	0
GBM	GSTZ1	OS	1.03028	0.864534	0.855788	Higher expr.	0
GBM	GSTZ1	PFS	1.09022	0.604473	0.596338	Higher expr.	0
GBM	GSTZ1	DSS	0.923285	0.667342	0.675149	Lower expr.	0
GBM	HAGH	OS	1.12449	0.501684	0.485673	Higher expr.	0
GBM	HAGH	PFS	1.07859	0.650071	0.637177	Higher expr.	0
GBM	HAGH	DSS	1.0328	0.862127	0.843232	Higher expr.	0
GBM	HPGDS	OS	0.977412	0.896363	0.923289	Lower expr.	0
GBM	HPGDS	PFS	1.13453	0.449543	0.438691	Higher expr.	0
GBM	HPGDS	DSS	0.958978	0.822845	0.850888	Lower expr.	0
GBM	IDH1	OS	0.8807	0.46643	0.469983	Lower expr.	0
GBM	IDH1	PFS	0.940977	0.714158	0.718278	Lower expr.	0
GBM	IDH1	DSS	0.796231	0.219237	0.220763	Lower expr.	0
GBM	MGST2	OS	1.15588	0.405783	0.386378	Higher expr.	0
GBM	MGST2	PFS	1.25225	0.176434	0.171802	Higher expr.	0
GBM	MGST2	DSS	1.18777	0.352956	0.334043	Higher expr.	0
GBM	MMACHC	OS	0.998617	0.993656	0.994071	Lower expr.	0
GBM	MMACHC	PFS	1.00098	0.995352	0.99008	Higher expr.	0
GBM	MMACHC	DSS	1.0297	0.874426	0.873067	Higher expr.	0
GBM	NAT8	OS	0.985334	0.9325	0.928202	Lower expr.	0
GBM	NAT8	PFS	0.872385	0.411253	0.410745	Lower expr.	0
GBM	NAT8	DSS	0.991044	0.96127	0.956099	Lower expr.	0
GBM	NFE2L2	OS	1.17111	0.362206	0.358409	Higher expr.	0
GBM	NFE2L2	PFS	1.31185	0.10231	0.100681	Higher expr.	0
GBM	NFE2L2	DSS	1.25295	0.22091	0.216675	Higher expr.	0
GBM	OPLAH	OS	1.3102	0.122967	0.121236	Higher expr.	0
GBM	OPLAH	PFS	1.32878	0.0874469	0.087876	Higher expr.	0
GBM	OPLAH	DSS	1.33029	0.125227	0.122593	Higher expr.	0
GBM	PARK7	OS	1.26912	0.170151	0.161678	Higher expr.	0
GBM	PARK7	PFS	1.04599	0.786766	0.777073	Higher expr.	0
GBM	PARK7	DSS	1.20923	0.302331	0.289248	Higher expr.	0
GBM	SLC1A1	OS	0.867811	0.422459	0.426761	Lower expr.	0
GBM	SLC1A1	PFS	0.829868	0.263576	0.259883	Lower expr.	0
GBM	SLC1A1	DSS	0.834345	0.336042	0.339172	Lower expr.	0
GBM	SLC1A2	OS	1.03537	0.84122	0.828533	Higher expr.	0
GBM	SLC1A2	PFS	1.1715	0.341909	0.338146	Higher expr.	0
GBM	SLC1A2	DSS	0.949626	0.779174	0.791549	Lower expr.	0
GBM	SLC7A11	OS	0.872872	0.432883	0.441928	Lower expr.	0
GBM	SLC7A11	PFS	0.830127	0.263238	0.264121	Lower expr.	0
GBM	SLC7A11	DSS	0.833544	0.322937	0.331043	Lower expr.	0
GBM	SOD1	OS	1.13548	0.463859	0.453184	Higher expr.	0
GBM	SOD1	PFS	1.06782	0.694145	0.686172	Higher expr.	0
GBM	SOD1	DSS	1.18139	0.365696	0.354743	Higher expr.	0
GBM	SOD2	OS	1.17977	0.342259	0.351746	Higher expr.	0
GBM	SOD2	PFS	1.29752	0.117359	0.119623	Higher expr.	0
GBM	SOD2	DSS	1.23555	0.256714	0.264392	Higher expr.	0
HNSC	ARL6IP5	OS	1.01976	0.885128	0.88506	Higher expr.	0
HNSC	ARL6IP5	PFS	1.08196	0.518438	0.518496	Higher expr.	0
HNSC	ARL6IP5	DSS	1.06766	0.709548	0.709386	Higher expr.	0
HNSC	ARL6IP5	DFI	1.95695	0.109144	0.102679	Higher expr.	0
HNSC	CHAC1	OS	1.12615	0.380149	0.379836	Higher expr.	0
HNSC	CHAC1	PFS	1.00072	0.995324	0.995469	Higher expr.	0
HNSC	CHAC1	DSS	1.19117	0.320752	0.320021	Higher expr.	0
HNSC	CHAC1	DFI	0.842667	0.657258	0.656883	Lower expr.	0
HNSC	CHAC2	OS	1.32376	0.0386958	0.0380917	Higher expr.	0
HNSC	CHAC2	PFS	1.32589	0.0210417	0.0206076	Higher expr.	0
HNSC	CHAC2	DSS	1.35081	0.0882999	0.0871907	Higher expr.	0
HNSC	CHAC2	DFI	0.724718	0.444892	0.442985	Lower expr.	0
HNSC	CTNS	OS	0.735161	0.0240492	0.0235125	Lower expr.	0
HNSC	CTNS	PFS	0.812261	0.0894034	0.0887722	Lower expr.	0
HNSC	CTNS	DSS	0.794314	0.192708	0.191692	Lower expr.	0
HNSC	CTNS	DFI	1.0516	0.897529	0.897518	Higher expr.	0
HNSC	DPEP1	OS	0.86775	0.294678	0.294392	Lower expr.	0
HNSC	DPEP1	PFS	0.851562	0.187587	0.187323	Lower expr.	0
HNSC	DPEP1	DSS	0.809291	0.230409	0.229831	Lower expr.	0
HNSC	DPEP1	DFI	1.20607	0.626208	0.625735	Higher expr.	0
HNSC	ETHE1	OS	1.14337	0.323903	0.323756	Higher expr.	0
HNSC	ETHE1	PFS	1.10446	0.415534	0.415011	Higher expr.	0
HNSC	ETHE1	DSS	1.21769	0.263698	0.262683	Higher expr.	0
HNSC	ETHE1	DFI	0.705601	0.361138	0.358791	Lower expr.	0
HNSC	G6PD	OS	1.21868	0.146256	0.145733	Higher expr.	0
HNSC	G6PD	PFS	1.09167	0.471566	0.471963	Higher expr.	0
HNSC	G6PD	DSS	1.31688	0.120651	0.119578	Higher expr.	0
HNSC	G6PD	DFI	0.663695	0.312898	0.309591	Lower expr.	0
HNSC	GCLC	OS	1.10795	0.448761	0.44904	Higher expr.	0
HNSC	GCLC	PFS	1.03998	0.747636	0.748612	Higher expr.	0
HNSC	GCLC	DSS	1.14812	0.432521	0.432774	Higher expr.	0
HNSC	GCLC	DFI	0.934207	0.860451	0.860425	Lower expr.	0
HNSC	GCLM	OS	1.09402	0.506535	0.506203	Higher expr.	0
HNSC	GCLM	PFS	1.05773	0.644792	0.644708	Higher expr.	0
HNSC	GCLM	DSS	1.17211	0.367022	0.366262	Higher expr.	0
HNSC	GCLM	DFI	1.19566	0.637226	0.636785	Higher expr.	0
HNSC	GGT1	OS	0.872001	0.310852	0.310562	Lower expr.	0
HNSC	GGT1	PFS	0.875738	0.275394	0.275188	Lower expr.	0
HNSC	GGT1	DSS	0.824877	0.273924	0.273295	Lower expr.	0
HNSC	GGT1	DFI	0.691092	0.349721	0.34701	Lower expr.	0
HNSC	GGT3P	OS	0.859065	0.261353	0.260813	Lower expr.	0
HNSC	GGT3P	PFS	0.901127	0.392438	0.392447	Lower expr.	0
HNSC	GGT3P	DSS	0.896685	0.534876	0.53471	Lower expr.	0
HNSC	GGT3P	DFI	0.9778	0.952915	0.952914	Lower expr.	0
HNSC	GGT5	OS	0.979144	0.877025	0.877197	Lower expr.	0
HNSC	GGT5	PFS	0.95074	0.680127	0.680185	Lower expr.	0
HNSC	GGT5	DSS	0.996462	0.983898	0.984397	Lower expr.	0
HNSC	GGT5	DFI	1.3783	0.399361	0.397396	Higher expr.	0
HNSC	GGT6	OS	0.838427	0.193045	0.192355	Lower expr.	0
HNSC	GGT6	PFS	0.863163	0.227149	0.226801	Lower expr.	0
HNSC	GGT6	DSS	0.748454	0.102264	0.100985	Lower expr.	0
HNSC	GGT6	DFI	0.940164	0.87072	0.8707	Lower expr.	0
HNSC	GGT7	OS	0.996878	0.98159	0.982004	Lower expr.	0
HNSC	GGT7	PFS	0.908252	0.430515	0.430727	Lower expr.	0
HNSC	GGT7	DSS	1.01215	0.945149	0.944587	Higher expr.	0
HNSC	GGT7	DFI	0.41927	0.0471053	0.0406105	Lower expr.	0
HNSC	GGTLC1	OS	0.83406	0.180045	0.179262	Lower expr.	0
HNSC	GGTLC1	PFS	0.834153	0.13668	0.136202	Lower expr.	0
HNSC	GGTLC1	DSS	0.746685	0.0991664	0.0979209	Lower expr.	0
HNSC	GGTLC1	DFI	0.647413	0.262036	0.258328	Lower expr.	0
HNSC	GGTLC2	OS	0.909197	0.48169	0.481333	Lower expr.	0
HNSC	GGTLC2	PFS	0.938911	0.604902	0.605173	Lower expr.	0
HNSC	GGTLC2	DSS	0.947315	0.757915	0.757977	Lower expr.	0
HNSC	GGTLC2	DFI	0.854274	0.681071	0.680766	Lower expr.	0
HNSC	GLO1	OS	0.907585	0.475526	0.475631	Lower expr.	0
HNSC	GLO1	PFS	1.07531	0.551569	0.551277	Higher expr.	0
HNSC	GLO1	DSS	1.11065	0.550631	0.550243	Higher expr.	0
HNSC	GLO1	DFI	0.922632	0.834047	0.834004	Lower expr.	0
HNSC	GLRX2	OS	1.14727	0.30911	0.308782	Higher expr.	0
HNSC	GLRX2	PFS	1.25312	0.0639259	0.0632462	Higher expr.	0
HNSC	GLRX2	DSS	1.23632	0.228252	0.227348	Higher expr.	0
HNSC	GLRX2	DFI	1.16865	0.680963	0.680663	Higher expr.	0
HNSC	GPX1	OS	0.927836	0.579127	0.578981	Lower expr.	0
HNSC	GPX1	PFS	0.968525	0.792572	0.793217	Lower expr.	0
HNSC	GPX1	DSS	0.953483	0.786164	0.786505	Lower expr.	0
HNSC	GPX1	DFI	1.52599	0.269146	0.265623	Higher expr.	0
HNSC	GPX4	OS	0.916329	0.517584	0.517293	Lower expr.	0
HNSC	GPX4	PFS	0.902979	0.401451	0.400422	Lower expr.	0
HNSC	GPX4	DSS	1.02493	0.888881	0.888904	Higher expr.	0
HNSC	GPX4	DFI	1.33438	0.447453	0.445898	Higher expr.	0
HNSC	GSR	OS	0.971106	0.828222	0.827834	Lower expr.	0
HNSC	GSR	PFS	0.885476	0.317604	0.31701	Lower expr.	0
HNSC	GSR	DSS	0.956242	0.798949	0.798754	Lower expr.	0
HNSC	GSR	DFI	0.719177	0.417746	0.415689	Lower expr.	0
HNSC	GSS	OS	1.1673	0.253173	0.252781	Higher expr.	0
HNSC	GSS	PFS	1.1962	0.141521	0.141059	Higher expr.	0
HNSC	GSS	DSS	1.39296	0.0616614	0.0605077	Higher expr.	0
HNSC	GSS	DFI	0.615559	0.213024	0.208695	Lower expr.	0
HNSC	GSTA1	OS	0.978362	0.872293	0.872181	Lower expr.	0
HNSC	GSTA1	PFS	1.0055	0.964254	0.963983	Higher expr.	0
HNSC	GSTA1	DSS	0.813407	0.243154	0.24228	Lower expr.	0
HNSC	GSTA1	DFI	0.604718	0.21633	0.211635	Lower expr.	0
HNSC	GSTA2	OS	1.11994	0.409524	0.40893	Higher expr.	0
HNSC	GSTA2	PFS	1.08044	0.53179	0.531346	Higher expr.	0
HNSC	GSTA2	DSS	0.926184	0.665115	0.665447	Lower expr.	0
HNSC	GSTA2	DFI	0.712342	0.408744	0.406565	Lower expr.	0
HNSC	GSTA3	OS	1.06102	0.661173	0.661538	Higher expr.	0
HNSC	GSTA3	PFS	1.0948	0.456704	0.456248	Higher expr.	0
HNSC	GSTA3	DSS	0.940379	0.727587	0.726672	Lower expr.	0
HNSC	GSTA3	DFI	0.668446	0.298384	0.295142	Lower expr.	0
HNSC	GSTA4	OS	0.876166	0.327958	0.32739	Lower expr.	0
HNSC	GSTA4	PFS	0.917711	0.480163	0.480235	Lower expr.	0
HNSC	GSTA4	DSS	0.776358	0.153162	0.15187	Lower expr.	0
HNSC	GSTA4	DFI	0.92001	0.826997	0.82695	Lower expr.	0
HNSC	GSTA5	OS	0.966018	0.897377	0.897166	Lower expr.	0
HNSC	GSTA5	PFS	0.970661	0.898164	0.898067	Lower expr.	0
HNSC	GSTA5	DSS	0.735738	0.400619	0.398602	Lower expr.	0
HNSC	GSTA5	DFI	3.83594e-08	0.997032	0.266023	Lower expr.	0
HNSC	GSTK1	OS	0.921452	0.548385	0.547929	Lower expr.	0
HNSC	GSTK1	PFS	0.986793	0.913524	0.913519	Lower expr.	0
HNSC	GSTK1	DSS	0.934968	0.702028	0.701651	Lower expr.	0
HNSC	GSTK1	DFI	1.62526	0.250706	0.246141	Higher expr.	0
HNSC	GSTM1	OS	0.912517	0.498753	0.498918	Lower expr.	0
HNSC	GSTM1	PFS	0.921078	0.499654	0.499031	Lower expr.	0
HNSC	GSTM1	DSS	0.906245	0.575506	0.575622	Lower expr.	0
HNSC	GSTM1	DFI	0.469921	0.0627051	0.0567689	Lower expr.	0
HNSC	GSTM2	OS	0.927059	0.575528	0.575663	Lower expr.	0
HNSC	GSTM2	PFS	0.922617	0.508028	0.507422	Lower expr.	0
HNSC	GSTM2	DSS	0.851161	0.361592	0.361171	Lower expr.	0
HNSC	GSTM2	DFI	0.545475	0.136011	0.130247	Lower expr.	0
HNSC	GSTM3	OS	0.85599	0.251557	0.251263	Lower expr.	0
HNSC	GSTM3	PFS	0.870709	0.256766	0.256269	Lower expr.	0
HNSC	GSTM3	DSS	0.873933	0.443076	0.443237	Lower expr.	0
HNSC	GSTM3	DFI	0.637987	0.256927	0.253048	Lower expr.	0
HNSC	GSTM4	OS	0.895219	0.414095	0.413806	Lower expr.	0
HNSC	GSTM4	PFS	0.94749	0.657784	0.657918	Lower expr.	0
HNSC	GSTM4	DSS	0.856255	0.377819	0.377206	Lower expr.	0
HNSC	GSTM4	DFI	1.0081	0.983042	0.983041	Higher expr.	0
HNSC	GSTM5	OS	0.910494	0.488334	0.487896	Lower expr.	0
HNSC	GSTM5	PFS	0.897032	0.372852	0.372024	Lower expr.	0
HNSC	GSTM5	DSS	0.71884	0.0639821	0.0627473	Lower expr.	0
HNSC	GSTM5	DFI	0.97541	0.94798	0.947979	Lower expr.	0
HNSC	GSTO1	OS	1.28966	0.0599206	0.0591947	Higher expr.	0
HNSC	GSTO1	PFS	1.32454	0.0212097	0.0207813	Higher expr.	0
HNSC	GSTO1	DSS	1.30572	0.129086	0.127813	Higher expr.	0
HNSC	GSTO1	DFI	0.744592	0.446705	0.445074	Lower expr.	0
HNSC	GSTO2	OS	1.01724	0.89969	0.899983	Higher expr.	0
HNSC	GSTO2	PFS	1.05445	0.663566	0.663213	Higher expr.	0
[truncated: 4,656 more rows]

## Sheet: Summary
Supplementary Table 1. Results of survival analysis of glutathione metabolism genes across 33 cancer types.
	OS HR>1	DSS HR>1	PFS HR>1		OS HR<1	DSS HR<1	PFS HR<1		OS	DSS	PFS
LGG	16	18	16	LGG	7	7	5	LGG	23	25	21
UVM	15	15	11	UVM	6	6	9	UVM	21	21	20
LAML	6			LAML	0	0	0	LAML	6
ACC	11	10	9	ACC	8	9	10	ACC	19	19	19
KIRP	9	11	6	KIRP	6	12	7	KIRP	15	23	13
STAD	7	4	7	STAD	4	3	5	STAD	11	7	12
ESCA	2	1	2	ESCA	0	0	1	ESCA	2	1	3
HNSC	4	3	3	HNSC	2	2	1	HNSC	6	5	4
KICH	2		3	KICH	0	0	0	KICH	2		3
SKCM	6	5	3	SKCM	4	5	5	SKCM	10	10	8
UCS	2	1	2	UCS	0	0	0	UCS	2	1	2
CHOL	1		1	CHOL	0	0	3	CHOL	1		4
GBM	1	2	5	GBM	0	0	1	GBM	1	2	6
LUSC	2	1	2	LUSC	1	7	1	LUSC	3	8	3
PCPG	2	1		PCPG	1	0	1	PCPG	3	1	1
THYM	1	1	3	THYM	0	0	1	THYM	1	1	4
BLCA	2	6	3	BLCA	2	5	4	BLCA	4	11	7
DLBC				DLBC	0	0	2	DLBC			2
LIHC	6	3	3	LIHC	6	7	7	LIHC	12	10	10
PRAD			2	PRAD	0	0	7	PRAD			9
READ			2	READ	0	0	1	READ			3
TGCT			3	TGCT	0	0	0	TGCT			3
UCEC	2	4	4	UCEC	2	2	3	UCEC	4	6	7
COAD	1	3	1	COAD	3	4	5	COAD	4	7	6
KIRC	11	14	12	KIRC	13	13	12	KIRC	24	27	24
MESO	4	4	3	MESO	6	2	6	MESO	10	6	9
BRCA		2		BRCA	3	4	2	BRCA	3	6	2
PAAD		1		PAAD	3	4	3	PAAD	3	5	3
CESC			2	CESC	5	2	2	CESC	5	2	4
LUAD	2	3		LUAD	7	7	8	LUAD	9	10	8
THCA		1	1	THCA	5	0	3	THCA	5	1	4
OV				OV	6	6	2	OV	6	6	2
SARC	3	3	5	SARC	10	7	8	SARC	13	10	13
