# Supplementary material for: Glutathione metabolism-related gene signature predicts prognosis and treatment response in low-grade glioma
Source: Aging (Albany NY). 2024 May 30;16(11):9518–46. doi: 10.18632/aging.205881 (PMC11210255; doi:10.18632/aging.205881)
Supplement: Supplementary Table 2 [file aging-16-205881-s003.xlsx]

## Sheet: DEGs between C2 and C1 clusters
Supplementary Table 2. Differential expression of genes between GM-high and GM-low clusters.
Gene	logFC	pvalue	fdr
TNMD	1.67789	1.81172e-08	4.64925e-08
FGR	1.004	4.02334e-19	2.80014e-18
CFH	1.90014	2.37071e-24	2.75135e-23
FUCA2	1.2903	3.71554e-37	2.71186e-35
SEMA3F	1.40476	8.54293e-10	2.50159e-09
LAP3	1.05661	1.16684e-39	1.42558e-37
WNT16	2.92788	4.40278e-06	8.93513e-06
HECW1	-1.90046	1.262e-34	5.98518e-33
TMEM176A	1.65752	4.83388e-31	1.30608e-29
MTMR7	-1.42544	4.45956e-34	1.89869e-32
HSPB6	2.17438	5.18692e-26	7.3752e-25
ZMYND10	2.65417	1.35399e-09	3.89182e-09
SKAP2	1.4979	1.42271e-24	1.70301e-23
MCUB	2.3764	1.99961e-49	5.61891e-46
HOXA11	1.68244	2.89231e-14	1.28167e-13
COPZ2	1.17657	8.00052e-24	8.799e-23
TSPOAP1	-1.20734	7.22431e-34	2.92617e-32
PON1	-1.36139	2.23836e-24	2.60852e-23
SOX8	-1.49987	7.77679e-33	2.64882e-31
ITGAL	1.49619	3.45519e-28	6.27405e-27
ITGA3	1.67298	1.02064e-24	1.23887e-23
ABCC8	-2.07232	1.51386e-33	5.90825e-32
CACNG3	-2.09825	8.13471e-13	3.15127e-12
TAC1	-1.44528	1.5113e-07	3.5493e-07
TNFRSF12A	2.85291	7.97719e-50	2.98879e-46
MAP3K9	-1.2554	5.95749e-09	1.61005e-08
ETV1	-1.05088	1.55415e-16	8.46964e-16
CCL26	1.22189	1.08015e-05	2.10159e-05
USH1C	-1.24588	2.95294e-17	1.7296e-16
ARHGAP44	-1.49481	6.45621e-26	9.08801e-25
SCIN	1.5637	1.1082e-21	9.92129e-21
ARSD	1.56277	6.5364e-28	1.15608e-26
PNPLA4	1.28458	6.45945e-14	2.77115e-13
PROM1	1.24053	3.28868e-06	6.7602e-06
DNAH9	2.01684	1.84605e-16	9.98779e-16
MATK	-1.04557	1.0157e-09	2.95265e-09
CD79B	1.80323	2.41195e-23	2.53368e-22
CACNA2D2	-1.12831	1.86062e-36	1.18155e-34
TEAD3	1.83646	4.77512e-31	1.29175e-29
SYN1	-1.58324	2.82786e-21	2.41254e-20
CAMK1G	-1.59685	3.68891e-06	7.54566e-06
DLEC1	1.37788	8.93594e-19	6.01437e-18
ADAM22	-1.04694	6.04051e-38	5.20271e-36
CELSR3	-1.57655	1.62397e-32	5.30621e-31
MMP25	1.05856	1.42243e-08	3.69286e-08
IL32	1.07442	1.45368e-17	8.76577e-17
MAPK8IP2	-1.18202	1.09313e-31	3.23336e-30
TRAF3IP3	1.2865	5.14201e-25	6.48303e-24
ETV7	2.17766	1.79236e-29	3.85203e-28
STAB1	1.11684	7.27974e-12	2.58651e-11
PRSS3	-1.1784	1.57794e-08	4.07678e-08
CD4	1.00224	8.62979e-21	7.03145e-20
BTK	1.09599	5.71254e-26	8.08168e-25
HFE	1.72144	5.85905e-37	4.10316e-35
MRC2	1.96198	3.83061e-42	8.61121e-40
SLC6A7	-2.3788	1.60996e-09	4.59464e-09
SYT7	-1.35949	3.09549e-08	7.78373e-08
PLAUR	2.04222	1.24169e-43	4.0454e-41
DCN	1.01047	0.000109712	0.000191336
TYROBP	1.34638	1.02488e-30	2.59745e-29
GABRA3	-1.60333	1.96873e-33	7.47586e-32
PRICKLE3	1.79621	7.94459e-39	8.08119e-37
LTF	6.1899	2.57212e-35	1.37343e-33
NR1H4	-1.0861	5.74961e-08	1.40996e-07
ALOX5	1.47043	6.53226e-31	1.72151e-29
SLC7A14	-1.58181	2.63326e-26	3.85138e-25
MVP	1.2468	1.34693e-29	2.93688e-28
GPRC5A	2.83736	3.70955e-29	7.62256e-28
CD6	1.60835	4.02641e-21	3.38749e-20
TACC3	1.07397	8.38493e-16	4.27519e-15
ACP3	1.54749	1.61942e-24	1.92109e-23
MTMR11	1.21064	4.77374e-29	9.67661e-28
WAS	1.03401	5.8615e-25	7.33258e-24
DPEP1	2.69437	7.9333e-19	5.37656e-18
IL20RA	1.67963	0.0023451	0.00349263
SLC11A1	2.24444	2.9973e-37	2.21642e-35
WWTR1	1.44057	4.15725e-31	1.13554e-29
MARCO	2.87915	0.000747814	0.0011876
SYT13	-2.06777	7.86602e-17	4.4207e-16
CD74	1.9615	8.47124e-39	8.5015e-37
HGF	2.00235	5.67981e-23	5.75923e-22
RUNX3	1.55661	8.39466e-28	1.46175e-26
SERPINB1	1.32385	1.05051e-40	1.69896e-38
NRXN3	-1.06037	6.004e-08	1.47058e-07
GABRA1	-2.44571	2.34771e-14	1.04737e-13
BIRC3	1.34311	2.70307e-12	9.9992e-12
DEF6	1.19974	1.10238e-30	2.78133e-29
EHD2	1.28751	5.66564e-31	1.50906e-29
DEPDC1	1.53227	7.73706e-12	2.73873e-11
TYMP	2.42793	1.13374e-41	2.29608e-39
VIM	2.1195	1.08778e-44	5.55757e-42
FAS	1.25893	3.38166e-20	2.60788e-19
RNASET2	1.02096	1.60232e-24	1.90281e-23
CD44	1.72012	2.52791e-35	1.35626e-33
SLAMF7	1.77301	2.71595e-20	2.11115e-19
INSRR	1.12198	0.0132915	0.0179146
SH2D2A	2.02977	1.23512e-35	6.95877e-34
VRK2	1.03544	1.4577e-18	9.62951e-18
TNFRSF1B	1.09866	7.09492e-23	7.11708e-22
ARNTL2	1.10946	4.57508e-13	1.81487e-12
ANK1	-1.22662	2.16381e-21	1.86871e-20
IBSP	5.04119	3.09012e-14	1.36475e-13
LRRC7	-1.14519	1.25072e-11	4.33224e-11
MAP2K3	1.06455	6.26291e-38	5.37368e-36
TMSB10	1.10624	4.89334e-31	1.31897e-29
METTL1	1.73467	2.53707e-13	1.03134e-12
HOXC8	3.64864	1.63283e-22	1.57469e-21
MSR1	2.06936	1.14281e-34	5.46604e-33
DNAH5	1.73456	1.98376e-15	9.76287e-15
C6	3.76828	1.14452e-11	3.97972e-11
RTN4R	-1.47997	3.19735e-26	4.6342e-25
RAB27B	-1.58174	6.60888e-32	2.00226e-30
MYO16	-1.14939	1.25125e-21	1.11179e-20
TNC	1.92934	7.34907e-31	1.91212e-29
RIPOR3	1.31205	1.65173e-15	8.19487e-15
CAPG	2.02786	3.68669e-47	5.1798e-44
ADAM28	1.00188	3.40081e-13	1.36567e-12
ZIC2	1.06842	7.06959e-12	2.51383e-11
LCP2	1.14727	1.06371e-25	1.45541e-24
DSG2	3.82495	1.80677e-19	1.29723e-18
CP	2.42124	1.13696e-26	1.74107e-25
EPN3	-1.05991	8.50084e-05	0.000149849
LTBP1	1.44673	2.2172e-26	3.26622e-25
ELN	1.27785	2.61705e-18	1.68668e-17
ARHGEF5	1.18083	3.62847e-07	8.21348e-07
NFE2L3	1.33186	3.8313e-22	3.55899e-21
LAMC3	1.28641	6.51744e-13	2.54761e-12
PTGER3	-1.22465	1.87417e-14	8.43103e-14
POLQ	1.00797	8.81568e-08	2.123e-07
CYBA	1.39243	2.29523e-34	1.03816e-32
ALX4	2.55373	1.2429e-05	2.40211e-05
FSTL4	-1.0134	4.13975e-12	1.50318e-11
MCF2L2	-1.42718	5.27395e-38	4.59539e-36
ENTPD2	1.51464	0.000735628	0.0011686
LY75	1.07611	4.02842e-25	5.1399e-24
PTPRN	-1.18984	4.34915e-12	1.57616e-11
GYG2	1.3188	2.66585e-11	8.93252e-11
F7	-1.46841	1.74824e-22	1.68094e-21
RASGRF1	-1.6284	8.86067e-21	7.2039e-20
TBXAS1	1.0417	1.60512e-23	1.71579e-22
PARP12	1.5176	2.50723e-40	3.58996e-38
PSD	-1.68287	2.01718e-32	6.4873e-31
YBX3	1.25097	2.39465e-31	6.73738e-30
STYK1	-2.40197	9.80509e-11	3.14255e-10
RIMBP2	-1.00485	1.89516e-06	3.99168e-06
BCAT1	1.98821	2.78985e-17	1.63963e-16
SPAG4	1.66	6.87013e-21	5.66339e-20
TNK2	-1.2196	1.85141e-34	8.52862e-33
ARSF	1.87388	8.41382e-08	2.03204e-07
SLC6A16	1.1722	1.02077e-11	3.56926e-11
GSC2	-1.89861	4.50599e-16	2.34913e-15
CASP8	1.42066	4.97716e-41	8.60666e-39
SPA17	1.65228	1.73039e-22	1.66449e-21
NGFR	1.89579	3.00702e-16	1.59166e-15
EYA2	1.32531	1.4852e-13	6.16456e-13
CHI3L2	3.0467	6.99259e-44	2.41836e-41
GLP2R	-1.54996	3.66662e-09	1.00879e-08
PDIA5	1.27579	2.10375e-30	5.11833e-29
SNAP91	-2.00765	1.17614e-46	1.36246e-43
TBC1D1	1.00804	2.27064e-36	1.42184e-34
ZMYND12	1.44101	8.35216e-18	5.13702e-17
NGEF	-1.03233	0.000560724	0.00090262
ASPM	1.17492	2.29098e-07	5.28656e-07
SPI1	1.32611	9.14938e-31	2.3346e-29
KIF26A	-1.2371	1.41249e-24	1.69167e-23
SP100	1.69243	2.21859e-48	4.98739e-45
TNFRSF1A	1.49145	7.99969e-48	1.58726e-44
PRKCZ	-1.05758	2.17116e-20	1.70359e-19
SYT1	-2.02967	4.87294e-10	1.45631e-09
PDZD4	-1.08719	1.51004e-28	2.84064e-27
ATP2B3	-1.76804	1.37901e-19	1.00194e-18
HDAC4	-1.14506	1.46816e-44	6.97782e-42
FGFR3	1.062	5.24131e-06	1.05521e-05
IFI35	1.20758	2.87875e-31	7.98941e-30
PITX1	2.56716	4.22295e-16	2.20618e-15
BCL3	1.33558	2.59171e-33	9.63001e-32
KCNAB2	-1.12934	2.06615e-06	4.33033e-06
GAL	1.34913	0.0325926	0.0416557
MAOB	2.14848	2.29541e-24	2.67085e-23
RAB27A	1.20842	2.11286e-37	1.63783e-35
SPTB	-1.27016	2.45862e-09	6.88474e-09
DAPP1	1.45278	8.46739e-23	8.44485e-22
FRMPD1	-1.2316	1.59286e-27	2.70246e-26
CNGB1	-1.37488	0.00288158	0.00424133
ST6GALNAC2	2.00417	5.64144e-10	1.67529e-09
CAMK2A	-2.26836	9.4296e-11	3.02782e-10
OSBPL3	1.10548	2.66273e-21	2.27945e-20
SLC6A15	-1.57325	6.68104e-09	1.79525e-08
ACTN1	1.91208	4.39153e-35	2.25392e-33
LIMS2	-1.00062	2.12782e-18	1.38487e-17
ASIC4	-1.51896	1.2183e-24	1.4685e-23
TRPC5	-1.08185	2.76972e-08	6.99901e-08
TRHDE	-2.0085	2.31607e-16	1.23965e-15
P4HA2	1.1846	7.87658e-22	7.12255e-21
FCGR2B	3.00752	5.48638e-27	8.6916e-26
EVC	1.74664	1.88585e-18	1.23453e-17
TP63	2.95122	4.54454e-08	1.12488e-07
ALPK1	1.43942	5.43134e-37	3.85163e-35
ADAM11	-1.3777	1.06628e-11	3.71915e-11
CD5L	1.31119	1.20939e-06	2.5989e-06
IGF2BP2	3.36272	3.02837e-28	5.53028e-27
TBX21	1.60475	4.72896e-16	2.46217e-15
FRY	-1.0321	2.67644e-40	3.7604e-38
GLI2	1.00224	8.36019e-11	2.69677e-10
PPP2R2C	-1.3235	5.58967e-13	2.2014e-12
TEAD2	1.63891	4.8536e-31	1.30983e-29
SNCB	-1.51376	1.74662e-16	9.47261e-16
ATP2A3	1.24413	2.15172e-26	3.17601e-25
NTN4	-1.13872	1.69731e-24	2.0103e-23
IPCEF1	-1.02185	6.94009e-05	0.000123604
WSCD2	-1.73765	9.41681e-24	1.02712e-22
KCNQ2	-1.20066	2.19243e-32	7.04083e-31
SEMA3A	1.89441	1.09397e-09	3.17199e-09
GTSE1	1.09891	5.90133e-05	0.000105918
CELSR1	2.32492	1.80309e-19	1.295e-18
FNDC3B	1.15859	2.13384e-29	4.52535e-28
FOSL2	1.16221	2.23052e-16	1.19585e-15
CACNG4	-1.10102	7.91256e-17	4.44575e-16
MOCOS	1.49494	7.21671e-18	4.46673e-17
WDR62	1.09464	3.01688e-09	8.37793e-09
ARHGAP15	1.32224	1.34829e-31	3.94142e-30
MCAM	1.07103	1.14711e-18	7.64967e-18
MBNL3	1.24312	1.20582e-25	1.63886e-24
CAMSAP3	-1.40966	2.78608e-31	7.76098e-30
STXBP2	1.19776	2.31606e-27	3.84812e-26
CTTNBP2	-1.12315	9.37463e-31	2.38936e-29
ACTL6B	-1.87174	2.97937e-33	1.09438e-31
PAK3	-1.75782	1.93151e-37	1.52352e-35
DCX	-1.4225	1.05845e-28	2.04065e-27
APBB1IP	1.03452	7.51201e-21	6.1564e-20
SLC25A43	1.10954	3.72195e-24	4.24718e-23
FBLN1	1.32887	1.94149e-11	6.58987e-11
CST7	1.63716	2.67699e-27	4.4087e-26
MAP2	-1.24432	7.21686e-41	1.21981e-38
AMPH	-1.16678	4.4704e-13	1.77489e-12
LAMP3	2.01194	7.14791e-21	5.87299e-20
FAP	1.53523	1.15301e-15	5.80898e-15
RBFOX1	-1.85492	1.62673e-08	4.19706e-08
HOXA9	4.05489	2.12191e-25	2.78787e-24
BRINP1	-1.17295	3.69173e-20	2.83533e-19
RUNX1T1	-1.12542	6.56951e-36	3.8459e-34
LXN	1.22682	6.97197e-22	6.35048e-21
SP140	1.21084	2.69584e-28	4.94311e-27
OPHN1	-1.27462	2.7723e-34	1.22439e-32
SCGN	-2.11915	2.327e-07	5.36633e-07
RIMS1	-1.80886	1.47186e-22	1.42742e-21
MOXD1	3.51485	2.01193e-15	9.89029e-15
EPHA6	-1.22894	1.36146e-13	5.66036e-13
COL5A3	1.25922	5.63771e-18	3.5273e-17
NDC80	1.09085	5.73065e-10	1.70067e-09
TCF7	1.74155	1.3746e-38	1.32055e-36
CDH7	-1.57728	1.06729e-19	7.8433e-19
PTPRC	1.46188	2.34488e-21	2.01888e-20
FYB1	1.11529	1.51638e-17	9.12426e-17
TRAF5	1.07449	4.57873e-19	3.17202e-18
OPRK1	-1.25187	4.22187e-10	1.26848e-09
NKAIN1	-1.1087	3.52066e-27	5.7144e-26
KIF3C	-1.18161	1.49295e-34	7.02125e-33
SLC25A24	1.36666	1.38039e-28	2.60546e-27
IGSF9	1.26422	2.89064e-06	5.97596e-06
TTC39A	1.06872	1.18278e-15	5.94962e-15
MGST2	1.04293	1.13513e-42	2.93308e-40
HBQ1	-1.36671	1.6765e-21	1.4724e-20
ITPKC	1.14787	6.45519e-36	3.78884e-34
LAT2	1.13829	2.24615e-28	4.1627e-27
NOX4	1.69366	1.78772e-16	9.68852e-16
TRIP6	1.62044	9.27497e-44	3.11196e-41
FTL	1.24007	7.41911e-35	3.64152e-33
MMP2	1.14656	1.16623e-15	5.87031e-15
NID2	1.64297	0.000165332	0.000282229
SULT2B1	1.00226	1.14595e-12	4.38017e-12
REM1	-1.08441	1.29149e-05	2.49101e-05
KIF9	1.05633	2.1357e-26	3.15443e-25
SIGLEC1	1.68329	2.74375e-12	1.0143e-11
CFAP61	2.08114	1.23998e-33	4.87321e-32
LHX5	-2.81074	6.25793e-23	6.31978e-22
OAS1	1.99197	5.69487e-32	1.74415e-30
CHGB	-2.08143	1.81185e-36	1.15712e-34
FXYD5	1.39127	1.04381e-34	5.03536e-33
BIRC5	1.18722	1.3212e-06	2.82566e-06
LAG3	1.07047	1.89656e-05	3.59695e-05
ARHGAP4	1.01167	2.38781e-24	2.76691e-23
RGS1	1.18052	8.48114e-16	4.32131e-15
ICAM1	1.62919	5.0312e-25	6.35758e-24
LYZ	2.32518	3.50477e-20	2.69912e-19
P3H2	2.04158	7.64003e-38	6.4325e-36
KIF4A	1.21639	8.54295e-10	2.50159e-09
DLL3	-1.47177	2.2627e-24	2.63551e-23
LAMB1	1.75289	2.029e-15	9.97202e-15
RAPGEF4	-1.5167	5.93545e-32	1.81043e-30
MAP3K20	1.25579	9.76231e-31	2.48254e-29
SMPX	-2.01944	1.38883e-11	4.78775e-11
SLC17A6	-1.9078	1.62785e-18	1.07157e-17
ANGPT2	1.49347	2.33663e-16	1.24918e-15
JPH4	-1.61623	8.93379e-45	4.78171e-42
MYH7	-1.18093	3.16225e-11	1.0533e-10
COL9A3	1.3264	9.34661e-10	2.72377e-09
TEKT2	1.44155	3.48763e-08	8.72102e-08
CLSPN	1.11647	1.32833e-07	3.13666e-07
TGFB2	2.24284	2.07131e-33	7.82572e-32
CDC45	1.13656	6.31818e-06	1.26161e-05
ADA2	1.4855	5.15623e-35	2.61063e-33
KRT31	-2.15464	9.95339e-11	3.18871e-10
CDC6	1.15024	2.33017e-08	5.93097e-08
PTGS1	1.59694	1.17279e-34	5.59753e-33
CRTAC1	-1.70042	1.04767e-37	8.5955e-36
TREM2	1.33774	8.17182e-28	1.42516e-26
FKBP5	1.47849	1.4276e-17	8.62005e-17
IL12RB1	1.0544	5.40444e-22	4.9629e-21
PCSK5	1.00448	2.62709e-15	1.27418e-14
PALMD	1.06453	1.589e-21	1.39917e-20
MACROH2A2	-1.02503	1.149e-28	2.19826e-27
STX1B	-1.51467	6.92528e-36	4.03317e-34
HSD3B7	1.50118	1.71502e-42	4.19061e-40
PCDH11Y	-2.07936	2.09347e-13	8.56905e-13
RASSF7	1.60289	6.78275e-11	2.20501e-10
GADD45B	1.06363	6.35893e-20	4.78089e-19
IGF2-AS	2.35848	0.00463702	0.00663359
MMP11	1.64797	4.29828e-23	4.41212e-22
SLC7A4	-1.3155	1.92838e-10	5.99357e-10
OSM	1.39801	4.62375e-09	1.26159e-08
SUSD2	1.48812	8.15476e-25	1.0012e-23
GGT5	1.05976	1.36119e-21	1.20376e-20
CYTH4	1.14324	1.09772e-20	8.85106e-20
SEZ6L	-1.8554	1.85542e-33	7.08145e-32
LGALS1	1.64391	6.12736e-40	8.00832e-38
SEPTIN3	-1.28113	8.04303e-46	6.45741e-43
TPTEP1	-2.20426	2.97824e-07	6.79634e-07
KDELR3	1.92514	1.67676e-21	1.4724e-20
CYP2D6	-1.09727	2.16445e-14	9.67716e-14
RAB36	1.5926	3.12495e-15	1.50265e-14
RASL10A	-1.84724	3.77225e-35	1.95843e-33
NEFH	-1.40231	4.88777e-06	9.87215e-06
HMOX1	1.51454	8.16087e-27	1.26696e-25
TSPO	1.09167	7.65361e-31	1.98447e-29
RASD2	-1.22578	9.04145e-09	2.39684e-08
SYNGR1	-1.12351	3.24447e-29	6.74082e-28
APOL4	2.48807	1.05069e-33	4.18045e-32
PNPLA5	-1.96355	7.25504e-09	1.9446e-08
APOL1	2.08111	4.33469e-35	2.22985e-33
CACNA1I	-1.59723	1.06792e-17	6.51301e-17
PVALB	-1.78501	2.48252e-13	1.01063e-12
NCF4	1.15167	1.1521e-22	1.12998e-21
CSF2RB	1.38023	1.08691e-20	8.76703e-20
UPK3A	1.58767	4.9166e-15	2.32733e-14
IL2RB	2.23127	2.01891e-26	2.99177e-25
KHNYN	1.22911	6.60506e-27	1.03616e-25
GZMH	2.17714	1.60014e-26	2.4061e-25
GZMB	1.09363	1.25042e-13	5.22191e-13
PYGL	1.62722	2.81867e-44	1.1315e-41
PLEK2	2.05783	1.75351e-31	5.04077e-30
SAMD15	1.02557	1.44186e-11	4.95839e-11
CHGA	-1.72339	8.54809e-25	1.04606e-23
SLC8A3	-1.14702	1.68514e-24	1.99799e-23
DHRS2	-1.75725	3.90771e-14	1.70842e-13
PLTP	1.02927	1.56873e-27	2.66352e-26
MMP9	3.13082	4.11926e-12	1.49627e-11
VSX1	1.08465	0.000143069	0.000246037
CD40	1.20003	1.84292e-29	3.9569e-28
MYBL2	1.4373	2.78075e-07	6.37091e-07
SLA2	1.21851	2.04995e-16	1.10325e-15
NFATC2	1.30345	5.20523e-29	1.04197e-27
PABPC1L	1.12297	1.20626e-11	4.18145e-11
SALL4	1.24538	0.010595	0.0144594
CTSZ	1.42541	3.03194e-39	3.42503e-37
HRH3	-1.74859	2.8165e-25	3.65771e-24
SLC17A9	1.29116	1.77759e-26	2.64988e-25
CHRNA4	-1.71085	8.37404e-35	4.09236e-33
SPEF1	2.16239	1.75179e-13	7.22971e-13
PROKR2	-1.95395	2.17768e-10	6.73188e-10
SIRPB1	1.45933	3.76103e-13	1.50428e-12
FERMT1	-2.12029	3.57778e-39	3.9043e-37
MYL9	1.28771	3.97121e-14	1.7348e-13
HCK	1.12215	7.85e-22	7.10418e-21
PAK5	-1.86013	3.80352e-46	3.28858e-43
JAG1	1.19661	1.83417e-14	8.26296e-14
SLC32A1	-1.53832	9.46097e-09	2.50307e-08
CST3	1.20514	6.26518e-16	3.23624e-15
FAM83D	1.08137	7.46942e-06	1.47888e-05
CELF4	-1.90516	1.36003e-23	1.46215e-22
MYL12A	1.48579	1.55604e-50	1.16599e-46
MXRA5	2.1353	1.55291e-13	6.43608e-13
TLR8	1.8016	4.87655e-19	3.371e-18
GLRA2	-1.01316	0.0127057	0.017166
MCF2	-1.44464	1.25597e-22	1.22597e-21
SYP	-1.32642	2.92349e-26	4.25924e-25
PLP2	2.22953	2.80275e-46	2.8639e-43
PLS3	1.04654	2.38942e-26	3.50158e-25
ELF4	1.51241	1.30505e-36	8.52851e-35
ZC3H12B	-1.14257	4.96125e-33	1.7536e-31
PHEX	1.24729	6.39702e-24	7.12974e-23
TIMP1	3.39571	1.80026e-45	1.349e-42
KLHL4	1.25546	1.07308e-10	3.42849e-10
GABRE	1.01102	0.00179706	0.00271656
PCDH11X	-1.77868	3.66593e-37	2.68437e-35
SRPX2	2.91648	2.04512e-33	7.73977e-32
RUBCNL	1.78625	3.07082e-30	7.30498e-29
NALCN	-1.04646	2.37429e-37	1.82164e-35
FGF14	-1.02481	1.37728e-24	1.65392e-23
HTR2A	-1.91425	5.62839e-24	6.31373e-23
ACP5	1.47868	4.09557e-16	2.14262e-15
FGF9	-1.0939	1.82201e-22	1.7459e-21
MEDAG	3.66081	6.86193e-11	2.2301e-10
OLFM4	-1.05375	9.00258e-07	1.96141e-06
MSLN	1.67578	1.65805e-13	6.85668e-13
HSF4	-1.04474	1.95774e-14	8.78444e-14
CBLN1	-2.07823	1.61616e-40	2.47158e-38
CCL22	1.98447	2.86589e-10	8.7558e-10
CCL17	1.8974	0.00782691	0.0108704
SMPD3	-1.44852	4.85805e-37	3.46695e-35
COTL1	1.02755	7.10488e-35	3.49492e-33
CRYM	-1.54957	1.47746e-07	3.47274e-07
PRSS33	2.08241	1.01286e-06	2.19588e-06
TOX3	-1.23187	4.19356e-25	5.34418e-24
PYCARD	1.21631	8.4427e-27	1.30891e-25
AQP9	1.58136	0.000103889	0.000181647
AP3B2	-1.05979	4.85144e-26	6.91569e-25
CD276	1.0746	8.78579e-31	2.24948e-29
TGM5	2.95428	3.1827e-26	4.61594e-25
SCG3	-1.45636	9.06928e-38	7.57909e-36
RHOV	-1.26144	5.23567e-08	1.28859e-07
PDGFRL	1.32079	1.24892e-12	4.75781e-12
CA2	1.28425	1.086e-14	4.99557e-14
EYA1	-1.22641	9.35742e-20	6.91957e-19
CPQ	1.42535	7.41159e-30	1.66779e-28
PLAT	1.87863	3.90728e-30	9.09286e-29
CCN4	3.03679	5.71587e-20	4.31791e-19
IL7	1.31205	2.85724e-15	1.37991e-14
STMN2	-1.88243	2.17069e-15	1.06474e-14
SPAG1	1.27419	4.35496e-24	4.93943e-23
GSDMD	1.72569	1.21216e-46	1.36246e-43
SH2D4A	3.08859	2.56087e-35	1.37067e-33
NEFM	-1.99869	2.24735e-09	6.31505e-09
KCNN4	1.76352	2.81392e-19	1.98671e-18
RELB	1.13067	4.2268e-32	1.3088e-30
SLC17A7	-1.81347	8.05573e-11	2.60153e-10
CD37	1.21588	5.4667e-27	8.66654e-26
DKKL1	1.72161	6.36431e-16	3.28669e-15
IL4I1	2.22758	4.85233e-35	2.46788e-33
LILRB1	1.29542	4.64398e-25	5.89478e-24
LILRA1	1.05725	1.93408e-19	1.38377e-18
ASF1B	1.34501	3.03808e-12	1.11704e-11
TNNT1	-1.37884	2.77663e-23	2.89915e-22
RASAL3	1.0666	1.48025e-24	1.76437e-23
EPHX3	1.93231	8.72732e-30	1.95039e-28
SYDE1	1.10358	1.78209e-42	4.30768e-40
SLC1A6	-1.99385	1.38353e-41	2.72849e-39
SHD	-1.63225	1.7936e-33	6.86883e-32
ZFR2	-1.60791	2.19776e-12	8.19068e-12
SLC1A5	1.23492	2.44184e-30	5.89609e-29
DENND3	1.03277	7.34217e-27	1.1454e-25
CEACAM4	1.31139	5.4431e-16	2.82393e-15
CD79A	1.41452	0.000165562	0.000282559
NKG7	1.70256	8.00308e-26	1.11399e-24
ICAM5	-1.45981	5.74202e-12	2.05936e-11
CD33	1.04325	5.64871e-22	5.17664e-21
CCDC114	1.55106	4.60813e-05	8.36422e-05
CAPS	2.29891	7.18308e-25	8.87229e-24
PLEKHA4	2.20618	1.08437e-45	8.40573e-43
MAST1	-1.45808	6.39875e-36	3.76555e-34
JAK3	1.61299	6.38324e-22	5.8284e-21
KCNN1	-1.03784	2.63324e-18	1.69614e-17
RAB3A	-1.63224	1.90497e-21	1.65727e-20
HAMP	2.08952	3.59487e-29	7.40721e-28
CDK6	1.08967	0.000904352	0.00142008
TFPI2	2.05576	2.75162e-08	6.95596e-08
NAMPT	1.83934	2.15526e-30	5.23787e-29
PIK3CG	1.20875	7.16896e-23	7.18814e-22
TTC26	1.43224	6.10576e-35	3.03667e-33
TFEC	1.29611	1.69217e-23	1.80712e-22
CAV2	1.53758	1.02356e-17	6.25098e-17
CAV1	1.69508	2.86803e-19	2.02301e-18
MET	2.76138	6.68313e-08	1.63054e-07
HOXA1	3.48676	1.09681e-37	8.93347e-36
HOXA2	3.70353	5.47849e-29	1.0957e-27
HOXA3	3.82327	2.32581e-24	2.70343e-23
HOXA5	3.24367	5.1595e-29	1.03558e-27
HOXA6	3.38758	6.3551e-25	7.9017e-24
VIPR2	-1.44037	8.50001e-19	5.73987e-18
CPVL	1.49896	9.01534e-34	3.59973e-32
STX1A	-1.34386	2.28673e-07	5.27778e-07
CRHR2	-1.05816	7.35916e-06	1.4586e-05
MINDY4	1.28904	1.20929e-19	8.84635e-19
HSPB1	1.71858	1.25526e-40	2.01559e-38
PCOLCE	2.01943	1.37631e-31	4.01295e-30
SERPINE1	2.72122	1.69746e-33	6.52289e-32
SFRP4	2.61807	1.03405e-32	3.45914e-31
MEST	1.22638	1.36679e-07	3.2224e-07
MEOX2	4.33153	2.72776e-06	5.65684e-06
RARRES2	2.96654	7.91678e-20	5.89108e-19
AHR	1.4388	1.66593e-18	1.09567e-17
GIMAP2	1.19774	6.44703e-32	1.96115e-30
TMEM176B	1.75695	4.211e-37	3.04384e-35
AEBP1	2.49438	6.31212e-27	9.92283e-26
GCK	1.72802	1.68806e-21	1.48121e-20
GALNTL5	-1.38528	6.63182e-08	1.61889e-07
SLC1A1	-1.59904	1.34936e-42	3.37039e-40
ASPN	1.66697	8.32525e-13	3.22231e-12
ECM2	1.97843	5.85308e-31	1.55529e-29
LHX6	-1.25894	0.000204183	0.000345426
TNFSF8	1.191	1.44056e-17	8.69134e-17
DNM1	-1.27325	6.60522e-06	1.31566e-05
ENG	1.03747	2.573e-30	6.1862e-29
ELAVL2	-1.96758	5.46202e-36	3.25693e-34
KCNT1	-1.92113	1.6703e-19	1.20347e-18
LHX3	-2.16236	2.52635e-17	1.49061e-16
GLIS3	1.28796	1.88201e-25	2.49014e-24
SH3GL2	-1.31679	4.44217e-30	1.02631e-28
PDLIM1	2.326	6.60884e-32	2.00226e-30
GATA3	2.24935	1.11193e-28	2.13459e-27
ATRNL1	-1.17897	1.66853e-23	1.78273e-22
CUBN	1.05513	7.21875e-23	7.23484e-22
ACTA2	1.21244	6.79228e-06	1.35112e-05
TLX1	-1.03486	5.24012e-16	2.72176e-15
CPEB3	-1.24607	3.32227e-38	2.99938e-36
NEURL1	-1.57659	2.30458e-12	8.58157e-12
MAP3K8	1.04986	1.76085e-14	7.9486e-14
DKK1	3.24863	0.000129603	0.000224218
EBF3	2.20239	0.00415623	0.0059854
RUNDC3A	-1.5186	4.99472e-40	6.76393e-38
P2RX1	1.40264	1.09118e-07	2.59774e-07
ALDH3A1	3.10276	1.03966e-29	2.30035e-28
LGALS3BP	1.22181	2.3511e-41	4.3887e-39
ASIC2	-1.12912	4.52754e-10	1.35599e-09
CCL2	1.76212	1.20571e-21	1.07429e-20
CCL8	1.53326	3.04831e-05	5.64139e-05
CCL1	-2.03691	5.06993e-06	1.02171e-05
ABI3	1.42716	6.19622e-34	2.5605e-32
COL1A1	3.37396	3.27196e-25	4.23209e-24
ABCC3	4.17834	2.98885e-44	1.17876e-41
HLF	-1.10746	8.71372e-26	1.20545e-24
FAM20A	2.14428	3.88483e-24	4.42631e-23
ALDOC	-1.10742	1.26324e-26	1.92006e-25
RAB34	2.34855	2.88376e-40	3.97712e-38
GABRA4	-2.06618	4.03868e-12	1.46837e-11
AREG	1.49467	4.78509e-08	1.1822e-07
SOD3	2.06495	2.17896e-27	3.63916e-26
SLC2A9	1.08463	8.20288e-28	1.42946e-26
NEIL3	1.2695	2.93222e-05	5.43818e-05
NKX3-2	2.03003	6.64286e-13	2.59346e-12
GLRB	-1.08509	4.37526e-28	7.85596e-27
BST1	1.08651	1.89259e-20	1.49649e-19
NCAPG	1.06623	3.93909e-06	8.03109e-06
DDX25	-1.13442	6.69302e-29	1.31866e-27
HTATIP2	1.09055	6.1082e-24	6.82467e-23
CTSC	1.58077	1.05306e-27	1.8238e-26
JHY	2.55971	3.37056e-19	2.36339e-18
UNC93B1	1.42715	1.80813e-40	2.72796e-38
MS4A6A	1.7126	3.32401e-28	6.05051e-27
MS4A4A	1.30641	5.95033e-16	3.07714e-15
CCKBR	-1.95304	6.53735e-12	2.33101e-11
FOLR1	2.52722	1.28128e-16	7.02863e-16
IL10RA	1.15105	3.40799e-17	1.98066e-16
UPK2	-1.09723	4.03677e-23	4.15316e-22
NECTIN1	-1.02503	1.1772e-31	3.47288e-30
KIAA1549L	-1.14436	2.86671e-24	3.3065e-23
SLC15A3	1.35301	4.04884e-36	2.45331e-34
CD5	1.99942	6.17633e-20	4.64827e-19
ACCS	1.40249	2.00406e-26	2.97368e-25
MDK	1.44996	1.80938e-10	5.63987e-10
SLC22A18	1.04688	2.77492e-18	1.78331e-17
C11orf21	1.80952	2.33352e-27	3.87426e-26
SOX6	-1.15897	9.14941e-31	2.3346e-29
TCIRG1	1.42971	8.32194e-40	1.04512e-37
PTPN5	-1.4242	1.70137e-10	5.32241e-10
VWF	1.01565	2.56002e-14	1.13936e-13
CD69	1.73437	4.81134e-29	9.73539e-28
CLEC2B	1.358	2.69476e-29	5.67749e-28
ASIC1	-1.20044	1.03322e-30	2.61563e-29
BCL7A	-1.11055	3.07405e-39	3.45377e-37
CYP27B1	3.22469	7.18121e-08	1.74734e-07
KRT18	2.17711	1.00739e-19	7.42737e-19
ACSS3	1.73824	6.69134e-16	3.44371e-15
GLI1	1.26741	9.6162e-10	2.79952e-09
ELK3	1.17691	3.49e-37	2.5723e-35
TRPV4	2.02177	4.23435e-10	1.27189e-09
PRMT8	-1.50793	3.40787e-10	1.03527e-09
CUX2	-2.2102	7.74424e-38	6.49591e-36
KCNA1	-1.15545	9.9904e-06	1.95053e-05
LTBR	1.44373	2.30576e-44	1.01634e-41
OAS3	1.67346	1.23232e-18	8.1815e-18
OAS2	1.94322	1.14899e-28	2.19826e-27
MGP	1.96265	6.12273e-25	7.64237e-24
RASAL1	-1.06307	8.19747e-06	1.6155e-05
ARHGDIB	1.10546	9.92198e-31	2.5203e-29
VDR	2.38327	2.58019e-33	9.60308e-32
FZD10	1.25956	0.00158955	0.0024203
PTPN6	1.14951	5.02826e-28	8.99247e-27
KLRB1	1.39484	1.10138e-18	7.35783e-18
COL12A1	1.89357	1.57788e-10	4.95403e-10
RSPH4A	2.57518	1.88057e-23	1.99603e-22
MAK	1.87677	1.15486e-11	4.01379e-11
ULBP1	1.86728	3.90558e-13	1.55946e-12
SLC26A8	-1.28425	2.67028e-08	6.75837e-08
SOD2	2.36425	7.86025e-49	1.96332e-45
PHACTR1	-1.28648	2.2294e-27	3.71514e-26
GLP1R	-2.51594	1.31153e-26	1.99077e-25
KHDRBS2	-1.65121	7.6542e-28	1.34217e-26
WASF1	-1.24254	1.49077e-39	1.79211e-37
CRYBG1	2.08594	2.88852e-27	4.74316e-26
VNN1	1.45963	3.72932e-19	2.60602e-18
VNN2	1.88697	1.68336e-22	1.62138e-21
EYA4	3.38998	7.33266e-12	2.60379e-11
NR2E1	1.39842	9.02281e-09	2.39218e-08
TRIM38	1.20933	6.77436e-35	3.33964e-33
ARFGEF3	-1.42305	2.88621e-38	2.6591e-36
C6orf118	2.32823	1.14284e-16	6.2891e-16
VEGFA	1.5529	1.85075e-11	6.29522e-11
TENT5A	1.42105	1.86413e-30	4.56489e-29
LY86	1.05352	3.66833e-21	3.09899e-20
C7	1.70989	0.000144296	0.00024809
KIF20A	1.37956	1.63999e-08	4.22935e-08
LOX	2.08861	1.39208e-25	1.87389e-24
CDH9	-2.18768	7.41189e-21	6.07776e-20
PCDHB7	1.27825	5.69395e-11	1.85885e-10
ITK	3.79022	8.65287e-28	1.50555e-26
THBS4	1.96229	1.57099e-06	3.33672e-06
GABRG2	-2.52209	5.76416e-27	9.09974e-26
CDH6	1.20947	8.52894e-12	3.00801e-11
SLC27A6	1.24036	0.000307283	0.00051036
PRLR	3.54107	0.0176985	0.0234833
SLC12A7	1.0912	6.36798e-30	1.44307e-28
ST8SIA4	1.36316	6.41869e-25	7.97635e-24
UNC5A	-1.65208	1.86292e-35	1.02142e-33
CNTN3	-1.68929	1.24438e-26	1.89396e-25
SMC4	1.13962	1.12187e-11	3.90459e-11
HGD	2.55108	3.69001e-13	1.47732e-12
CD86	1.11655	9.32855e-22	8.39494e-21
AMOTL2	-1.09277	8.71484e-31	2.23641e-29
RBP1	2.74483	1.25207e-20	1.00416e-19
FGF12	-1.46557	2.279e-39	2.64082e-37
IQCG	1.25104	6.58874e-29	1.30155e-27
CISH	2.00873	7.57858e-43	2.05261e-40
IL1A	1.15917	1.378e-12	5.23355e-12
CCL20	1.89405	1.2363e-15	6.21049e-15
KCNIP3	-1.36757	1.59191e-35	8.8143e-34
ZAP70	1.6745	6.32868e-24	7.06399e-23
STEAP3	2.54263	2.01326e-40	2.9907e-38
TFCP2L1	2.68738	4.30671e-18	2.71799e-17
CENPA	1.54377	1.54601e-11	5.29389e-11
CYTIP	1.53229	2.49454e-28	4.58897e-27
SLC30A3	-1.47119	7.98887e-08	1.93463e-07
ITGA4	1.21882	3.92317e-09	1.07645e-08
PDE1A	-1.33383	2.6419e-15	1.28106e-14
IFIH1	1.33058	3.90731e-30	9.09286e-29
GRB14	1.16813	3.83562e-08	9.55504e-08
GALNT3	2.5355	1.40227e-24	1.68123e-23
ACADL	1.41986	2.0554e-06	4.30999e-06
EFEMP1	1.3152	7.26814e-19	4.94066e-18
FN1	1.72062	1.26514e-17	7.67207e-17
STAT1	1.16142	3.20797e-22	3.00856e-21
IGFBP2	3.45037	1.31008e-31	3.84471e-30
IGFBP5	1.40679	2.26043e-19	1.60856e-18
OTX1	2.63432	4.1295e-12	1.49969e-11
GNLY	2.18852	4.07911e-23	4.1948e-22
IL1R2	1.17063	5.17393e-08	1.27407e-07
IL1R1	1.94198	7.8632e-14	3.34655e-13
SLC9A2	-1.60389	4.12212e-33	1.47556e-31
PROC	1.46156	7.35297e-16	3.76955e-15
SDC1	1.94111	7.38709e-12	2.62092e-11
KYNU	1.61903	1.85694e-31	5.31096e-30
PLEK	1.19462	2.97921e-19	2.09683e-18
TNR	-1.84876	9.74778e-38	8.05626e-36
PAPPA2	2.25926	1.62363e-16	8.83602e-16
CHD5	-1.42782	3.19267e-12	1.17178e-11
OPRD1	-1.00377	9.62696e-05	0.000168731
DLGAP3	-1.69378	6.85923e-32	2.06696e-30
NCF2	1.14568	7.52983e-25	9.27002e-24
GADD45A	1.56496	2.42278e-32	7.74739e-31
OLFML3	1.41405	3.11541e-35	1.63251e-33
CRYZ	1.01796	1.30906e-22	1.27338e-21
CD58	1.90177	4.5587e-47	6.02821e-44
CD2	2.86788	2.62432e-33	9.73511e-32
KIF21B	-1.29991	7.12899e-37	4.93106e-35
NT5C1A	-1.06528	1.71895e-19	1.23694e-18
HPCAL4	-1.48887	4.29922e-17	2.47685e-16
RIMS3	-1.37206	8.67595e-11	2.7934e-10
CD48	2.13161	6.33598e-28	1.12329e-26
MFAP2	1.79158	2.46786e-18	1.5951e-17
RGS4	-1.85057	1.00876e-05	1.96866e-05
GBP3	1.76016	2.77024e-28	5.07538e-27
GBP1	2.77205	5.8467e-45	3.65094e-42
ECE1	1.17799	1.63139e-40	2.47794e-38
CDC20	1.36551	9.00118e-14	3.80709e-13
F3	1.77449	8.40767e-24	9.22423e-23
RCAN3	1.44953	7.2417e-26	1.01177e-24
MAN1C1	1.68749	6.3121e-27	9.92283e-26
NEK2	1.10337	1.47845e-05	2.8375e-05
RPS6KA1	1.20096	8.1098e-33	2.74975e-31
CENPF	1.01149	7.53074e-06	1.49076e-05
MTARC2	1.05954	2.81835e-09	7.84988e-09
COLEC11	1.44095	8.19365e-10	2.4043e-09
SLC8A2	-1.8244	2.374e-30	5.74461e-29
KIF14	1.0448	1.58198e-06	3.35879e-06
TTR	14.4526	5.23607e-11	1.71684e-10
C1orf54	1.16388	4.4034e-37	3.16257e-35
CFAP94	1.4657	2.83558e-11	9.48288e-11
PLAGL1	1.19316	1.08712e-11	3.78777e-11
TNFAIP3	1.14371	3.74232e-21	3.15794e-20
RAB32	1.51425	5.69764e-44	2.03306e-41
VAMP8	1.33809	5.3085e-31	1.42235e-29
OLFM3	-2.24206	1.81128e-11	6.16747e-11
SPP1	2.09582	6.98215e-34	2.84862e-32
RARRES1	1.67806	1.86839e-09	5.28917e-09
GDA	-1.59225	4.24264e-05	7.73078e-05
ECRG4	1.79151	1.24473e-11	4.31213e-11
TRIM67	-2.92711	2.27529e-21	1.96046e-20
NEK6	1.08721	5.9039e-20	4.45368e-19
HDHD3	1.31093	1.13342e-24	1.36985e-23
GALNT12	1.05521	2.13668e-17	1.26809e-16
CSF3R	1.08174	3.51515e-24	4.02961e-23
NPC2	1.18943	8.02987e-43	2.14895e-40
LTBP2	1.50899	2.47393e-20	1.93104e-19
PPP4R4	-1.43789	1.67672e-16	9.1089e-16
ESRRB	1.02055	1.12839e-14	5.18417e-14
CNNM1	-1.73838	1.62508e-18	1.07007e-17
PRLHR	-1.34028	2.97439e-31	8.23451e-30
KCNIP2	-2.19667	1.13223e-36	7.48607e-35
HOXB8	2.97302	9.86302e-23	9.74597e-22
HOXB5	2.33833	5.5796e-17	3.17543e-16
HOXB3	4.07619	2.08354e-29	4.43164e-28
CD274	1.70791	1.60642e-26	2.41393e-25
GRIA2	-1.54271	2.44886e-43	7.34005e-41
ARAP3	1.70032	1.12327e-21	1.00322e-20
IQSEC3	-1.53079	1.18401e-20	9.52632e-20
TGFBI	1.55375	5.07312e-15	2.39991e-14
SOCS2	2.19543	7.74318e-28	1.35566e-26
CLU	1.01269	4.69363e-24	5.31015e-23
CHRNA2	-1.5875	1.65661e-07	3.87357e-07
CRISPLD1	1.47374	3.41858e-25	4.40653e-24
RDH10	2.30012	1.24335e-38	1.21524e-36
LRAT	1.94615	3.27352e-20	2.52796e-19
TRIM6	1.57727	1.05834e-28	2.04065e-27
ECHDC2	1.80409	1.11947e-21	1.00024e-20
PLBD1	1.95615	2.31908e-42	5.45665e-40
CSTA	2.1993	5.08184e-34	2.12342e-32
KIF18A	1.38135	4.55152e-13	1.80614e-12
CRY2	-1.03256	5.26137e-39	5.55285e-37
GJA3	1.69612	3.55178e-11	1.17816e-10
HCRTR1	-1.25473	1.04169e-05	2.02992e-05
CCRL2	1.01847	1.39224e-24	1.67009e-23
CCR2	2.3703	9.10398e-24	9.94449e-23
CPXM2	2.1895	0.00217177	0.00324718
HPCA	-1.20031	9.19702e-07	2.00222e-06
TMIGD3	1.10887	1.91735e-16	1.03486e-15
CXCR4	1.21413	8.34826e-24	9.16352e-23
SASH3	1.35847	1.34327e-28	2.53967e-27
FMOD	2.60648	2.34533e-24	2.72471e-23
OPN4	-1.5237	1.61707e-09	4.61374e-09
KIAA0087	-1.33329	3.93949e-13	1.57216e-12
WIPF3	1.16434	3.13986e-11	1.04616e-10
NXPH1	-1.27188	1.47697e-22	1.43113e-21
HOXA7	2.90545	3.82538e-20	2.93397e-19
FKBP9	1.64261	5.04611e-23	5.14451e-22
RAMP3	1.79905	8.71538e-19	5.87824e-18
TWIST1	1.84907	2.64436e-14	1.17504e-13
PHF24	-1.50306	5.04343e-07	1.12532e-06
CALD1	1.0645	5.01107e-23	5.11112e-22
PLAU	2.91972	9.35254e-37	6.33268e-35
CDKN2C	1.22832	1.10621e-12	4.23785e-12
NECAB1	-1.04312	0.000422973	0.000690067
ADGRE5	1.66105	4.64401e-29	9.43918e-28
CENPK	1.38655	6.31575e-09	1.70197e-08
NEUROD4	-1.86281	1.54155e-21	1.35845e-20
ARHGAP9	1.16036	4.79339e-30	1.10405e-28
NCKAP1L	1.08705	4.64576e-21	3.88241e-20
MMP19	2.95147	2.11911e-23	2.24283e-22
HOXC13	5.34112	4.53631e-27	7.27363e-26
CDK2	1.1068	2.03432e-26	3.01063e-25
HOXC11	5.2687	2.37908e-25	3.10759e-24
EEF1AKMT3	1.99382	4.8131e-17	2.75877e-16
SARDH	1.09929	1.21685e-07	2.884e-07
HJURP	1.21612	2.76545e-06	5.73182e-06
IL13RA2	3.237	1.41923e-19	1.02921e-18
ESX1	-1.44912	4.07824e-15	1.94194e-14
NMI	1.42468	4.27489e-42	9.42153e-40
TNFAIP6	2.56015	7.65765e-23	7.66105e-22
ACVR1C	-1.19025	1.34764e-13	5.60809e-13
BATF3	1.6356	2.86558e-23	2.98647e-22
G0S2	2.96983	2.68495e-22	2.53711e-21
RAB38	1.6644	1.25473e-30	3.14451e-29
GPR83	-1.63972	4.57827e-10	1.3708e-09
DAW1	2.27278	0.000402415	0.000658343
HMGB1P1	1.22996	6.5341e-13	2.55366e-12
PI3	1.62113	1.41319e-05	2.71781e-05
SLC12A5	-2.10953	1.80449e-14	8.13252e-14
SDC4	1.79438	3.8803e-18	2.46341e-17
GDAP1L1	-1.59813	5.53229e-40	7.35893e-38
SNAI1	2.00223	3.52259e-23	3.64418e-22
KCNK15	1.02517	0.0220488	0.0289232
ZBP1	2.3627	1.77939e-27	3.0036e-26
ATP8A1	-1.18298	1.03839e-32	3.46848e-31
F13A1	2.67095	1.26e-06	2.70043e-06
GRM4	-1.21545	1.34087e-23	1.44234e-22
PACSIN1	-2.09274	1.06887e-11	3.7276e-11
BTN2A2	1.19501	4.19212e-37	3.03996e-35
BTN2A3P	1.15315	1.53751e-25	2.05979e-24
H2BC11	1.10578	6.49415e-21	5.35541e-20
TREM1	2.98415	1.93489e-33	7.37228e-32
COL21A1	2.12373	6.89414e-13	2.68876e-12
CPNE5	-1.20502	3.58478e-23	3.70339e-22
RUNX2	1.24464	2.28951e-23	2.41075e-22
RAB17	1.07233	0.00120333	0.00185995
SCGB1D2	2.4751	7.69519e-13	2.9908e-12
SH3TC1	1.03326	1.99544e-24	2.3461e-23
RAP2A	-1.14045	1.031e-40	1.67948e-38
EFNB2	1.04536	1.46591e-16	8.00431e-16
IRF1	1.66094	1.97907e-38	1.86148e-36
PTGER2	3.46411	1.95182e-21	1.69343e-20
TEKT3	1.16573	8.43161e-13	3.26013e-12
HS3ST3B1	3.29418	1.3226e-22	1.28599e-21
SLC2A4RG	1.11727	1.57233e-36	1.01278e-34
PSD4	1.14721	7.4046e-26	1.03388e-24
CD70	2.16269	3.71143e-17	2.14867e-16
C3	1.68726	7.6474e-33	2.61267e-31
TRIP10	1.08395	1.18239e-35	6.67843e-34
TNFSF14	3.24517	1.056e-37	8.63229e-36
CD93	1.50509	1.37463e-19	9.99083e-19
NAPB	-1.46561	2.96987e-14	1.31345e-13
BMP2	-1.72855	3.86992e-33	1.39416e-31
PCSK2	-1.40649	2.68567e-25	3.49588e-24
LRRN4	-1.15258	1.59308e-22	1.53899e-21
CITED1	1.33115	4.96572e-05	8.98498e-05
GDF5	1.87967	3.37718e-17	1.96427e-16
MMP24	-1.44049	5.5303e-25	6.9492e-24
IGFLR1	1.22987	1.28544e-27	2.20417e-26
HCST	1.39712	1.35204e-21	1.19708e-20
CCR7	1.94048	7.4992e-13	2.91614e-12
BCL2L12	1.53143	3.17646e-46	2.97529e-43
FLRT1	-1.35587	1.0588e-39	1.3078e-37
STAT5A	1.12447	2.58355e-35	1.37626e-33
PRKCG	-1.79291	1.53872e-10	4.83783e-10
IFI6	1.73094	1.22312e-28	2.3262e-27
DACH2	-1.68111	1.47117e-25	1.97444e-24
RHOJ	1.28567	8.43504e-15	3.92182e-14
DLGAP5	1.37117	2.61553e-09	7.30399e-09
TMEM35A	-1.18693	2.35513e-34	1.05887e-32
PPCS	1.01408	6.41134e-34	2.63969e-32
HELB	1.32132	1.11191e-13	4.66511e-13
TAS2R3	-1.06004	1.17378e-12	4.48369e-12
LRRC61	1.25556	1.31077e-10	4.15426e-10
FGFRL1	1.64044	3.68095e-29	7.57071e-28
PLA2G5	2.74615	3.59082e-19	2.51391e-18
ADGRE2	1.80155	1.72311e-25	2.28933e-24
F2RL3	1.28838	3.09848e-05	5.7274e-05
SYNGR3	-1.31415	2.87287e-09	7.9958e-09
FBXL16	-1.45775	4.14996e-26	5.94589e-25
GNG13	-1.69052	8.55542e-11	2.75642e-10
TNFRSF19	1.2559	5.31667e-23	5.41299e-22
FGL2	1.42901	7.68394e-26	1.07089e-24
ZFP36	1.3509	1.05714e-19	7.77382e-19
ADM2	1.83537	3.71264e-16	1.94864e-15
RFPL2	-1.58752	2.99587e-08	7.54253e-08
POM121L9P	1.23631	3.13462e-17	1.82934e-16
GALR3	-1.11808	4.13747e-19	2.87868e-18
APOL2	1.2017	2.25063e-26	3.30897e-25
RAC2	1.68822	3.83936e-34	1.66298e-32
LIF	3.33689	3.12052e-30	7.39971e-29
APOBEC3F	1.82967	3.95002e-44	1.53097e-41
RIBC2	2.86769	1.55245e-13	6.4354e-13
CPA4	2.1277	2.78235e-14	1.2344e-13
FLNC	2.62144	3.38146e-33	1.23002e-31
CALU	1.00159	3.23508e-28	5.89818e-27
IRF5	1.03165	1.17171e-26	1.79184e-25
LRRC17	1.07294	2.02381e-06	4.24753e-06
FEZF1	3.48528	4.00659e-13	1.59724e-12
CHN1	-1.0292	0.00254271	0.00376996
GAD1	-1.33664	1.65492e-25	2.20656e-24
HOXD9	1.94557	7.13075e-14	3.04809e-13
HOXD10	3.47709	1.84342e-14	8.30298e-14
HOXD11	4.22124	9.90187e-20	7.31015e-19
HOXD13	3.26624	2.66409e-16	1.41681e-15
TWSG1	1.10543	3.17125e-30	7.51208e-29
WDFY4	1.04639	2.14102e-18	1.39306e-17
MYO5C	1.63174	1.72876e-08	4.446e-08
ISLR	1.50028	2.4686e-07	5.68065e-07
LOXL1	2.57636	1.06474e-32	3.55125e-31
MYOD1	-3.55907	7.52935e-29	1.47182e-27
KCNC1	-1.23351	2.37122e-20	1.85344e-19
E2F8	1.49477	1.46305e-10	4.61669e-10
DCTD	1.0495	2.0207e-30	4.93219e-29
PIMREG	1.08327	8.19777e-05	0.000144833
SIGLEC9	1.52476	1.55686e-31	4.50428e-30
RIPK3	1.23917	2.95102e-29	6.15961e-28
AJUBA	1.3159	1.76649e-22	1.69703e-21
FOXJ1	2.90889	1.53312e-27	2.60897e-26
FGF13	-1.0772	4.12585e-18	2.61119e-17
CDH15	-1.03004	1.75057e-05	3.33554e-05
PLPPR3	-1.47667	1.18947e-26	1.81653e-25
SYT5	-1.15663	1.6931e-07	3.95561e-07
PRRG3	-1.25465	0.00065847	0.00105207
GDPD2	1.37136	2.18138e-12	8.13223e-12
CNN1	1.3278	0.00241679	0.00359227
APOC1	1.10717	9.7313e-15	4.49845e-14
PLVAP	1.13652	1.03421e-10	3.30807e-10
BST2	1.77565	2.05098e-36	1.29148e-34
MAS1	-1.86791	5.10219e-08	1.25696e-07
EPO	1.80732	0.000345307	0.000570018
UNC13A	-1.55814	8.05758e-32	2.40232e-30
KLHDC7B	2.12344	4.32356e-28	7.77549e-27
GDF15	3.32613	2.25486e-28	4.17539e-27
SULT4A1	-1.9693	6.29535e-11	2.05071e-10
OLFM1	-1.23029	9.20841e-20	6.81162e-19
HELZ2	1.29397	1.25164e-22	1.22228e-21
LSP1	2.24781	2.02922e-37	1.59499e-35
TNNI2	1.48058	5.32338e-27	8.45125e-26
H19	2.94781	8.99712e-07	1.96041e-06
COL5A1	2.88102	9.48348e-24	1.03389e-22
CALY	-1.3548	6.30311e-10	1.86391e-09
GATA5	-1.7297	1.60378e-22	1.54867e-21
GMFG	1.10329	9.37773e-30	2.08931e-28
THEMIS2	1.17336	7.18307e-25	8.87229e-24
HIP1R	-1.0668	7.86601e-20	5.85911e-19
ANGPTL6	1.10409	4.78461e-20	3.6411e-19
PNCK	-1.27068	2.02718e-20	1.59674e-19
DUSP9	-1.31572	1.14022e-22	1.11882e-21
RGN	1.44007	1.22387e-11	4.24118e-11
ULBP3	2.01982	3.72934e-19	2.60602e-18
LILRB2	1.356	1.03365e-19	7.61113e-19
NFATC1	1.05353	1.37179e-25	1.85101e-24
IDO1	4.78802	3.59643e-30	8.44803e-29
RFTN1	1.12441	4.45535e-17	2.56154e-16
NAPSB	2.13467	1.06658e-34	5.13421e-33
PDLIM4	3.09045	8.5858e-26	1.18921e-24
BARX1	2.98817	0.0013363	0.00205486
IL13RA1	1.06451	1.9558e-29	4.17139e-28
GCH1	1.42649	5.12569e-27	8.16045e-26
LGALS3	1.92187	1.33571e-27	2.28689e-26
PODNL1	3.19721	7.48685e-26	1.04407e-24
RTBDN	-1.20855	5.82841e-11	1.90164e-10
TRIM21	1.07788	3.23977e-35	1.69372e-33
EMILIN2	1.97628	1.09276e-35	6.1877e-34
TRIM5	1.15574	3.2476e-28	5.91622e-27
TRIM22	1.35469	5.47034e-30	1.251e-28
SERPINF1	1.88741	8.91932e-23	8.87196e-22
SEC61G	3.06516	2.00263e-24	2.35332e-23
JCHAIN	1.60845	3.31186e-08	8.29967e-08
ITGB4	1.44151	4.28627e-25	5.45617e-24
CLEC10A	1.5406	1.66626e-10	5.21912e-10
XAF1	1.85014	8.24256e-16	4.20738e-15
RGS22	3.19451	1.25179e-15	6.28691e-15
MATN2	1.10249	2.82767e-20	2.19572e-19
ANKEF1	1.35555	1.00387e-05	1.95949e-05
SNAP25	-2.0327	1.76338e-19	1.2681e-18
LPIN3	2.03533	1.92377e-20	1.51798e-19
VSTM2L	-1.02689	5.23011e-07	1.16397e-06
SYT4	-2.32777	2.42602e-20	1.89496e-19
SLC14A2	-2.21849	1.4591e-14	6.63863e-14
NMUR2	-1.70594	2.18523e-16	1.17353e-15
PDE6A	4.05236	9.83566e-09	2.59697e-08
ATP8A2	-1.74703	1.97482e-20	1.55659e-19
MTUS2	-1.65028	7.27292e-11	2.35856e-10
ALOX5AP	1.75874	3.77311e-36	2.31116e-34
GPR12	-1.06332	1.2315e-06	2.64388e-06
CHI3L1	5.11607	2.52208e-39	2.87798e-37
MYBPH	3.13547	3.47271e-35	1.8071e-33
CHIT1	1.50792	1.6559e-09	4.71687e-09
LGR6	3.58993	1.11461e-12	4.26866e-12
EPSTI1	1.7822	1.676e-33	6.46253e-32
POSTN	5.8428	6.11693e-18	3.8091e-17
STOML3	5.56752	8.34112e-07	1.82472e-06
TBC1D8B	1.19803	1.0587e-09	3.07409e-09
BEX1	-1.01211	7.17216e-31	1.87477e-29
PRAM1	1.41383	1.82515e-32	5.87814e-31
PLAAT4	1.19301	3.1893e-27	5.21043e-26
PLAAT2	1.71612	1.96466e-21	1.70392e-20
NTS	5.89338	0.0105919	0.0144561
LRRIQ1	3.72527	2.92392e-10	8.92702e-10
SWAP70	1.30325	1.08516e-34	5.21246e-33
LYVE1	-1.04398	4.65159e-14	2.01946e-13
DUSP26	-1.31868	1.60509e-39	1.90912e-37
GSC	1.08395	1.08689e-07	2.58865e-07
UNC79	-2.00883	2.65159e-40	3.74892e-38
LOXL2	1.48774	1.05507e-17	6.43635e-17
ADAMDEC1	1.74868	4.78448e-11	1.57267e-10
CCNB1	1.15179	1.47699e-11	5.07377e-11
CD180	1.39184	9.80835e-25	1.19378e-23
CNTN6	-1.81008	1.0651e-16	5.88442e-16
GNAT2	1.12978	5.76987e-12	2.06869e-11
TSPAN2	1.43628	0.000113216	0.000197068
GSTM5	1.40477	0.0199372	0.0262975
VAV3	2.88732	2.56704e-27	4.24004e-26
PSRC1	1.62225	3.80517e-35	1.97097e-33
PTPN22	2.47766	5.71195e-34	2.37347e-32
PTGFRN	1.46423	2.27899e-24	2.65311e-23
CD101	1.94999	5.65204e-25	7.08633e-24
RSAD2	2.07353	6.23244e-19	4.27541e-18
CMPK2	1.43316	9.69197e-18	5.93181e-17
SAA2	5.02865	4.32169e-09	1.18261e-08
ANO3	-1.77526	3.91057e-19	2.72588e-18
IL2RA	2.94036	5.71017e-13	2.24689e-12
ECHDC3	1.13907	3.87964e-13	1.54937e-12
IL15RA	1.06624	1.99502e-15	9.81155e-15
DOCK2	1.03133	1.93916e-18	1.26832e-17
EMP1	1.53834	5.38318e-26	7.63977e-25
RAB33A	-1.05702	4.55355e-29	9.26369e-28
PIWIL4	1.11007	5.68715e-22	5.20975e-21
SPOCD1	3.24919	1.24186e-31	3.65404e-30
CDCA8	1.09266	1.03048e-12	3.95512e-12
HOOK1	-1.30166	6.53323e-07	1.44058e-06
DSC2	1.08802	8.51646e-11	2.74441e-10
SLC43A3	1.85653	9.05088e-36	5.16406e-34
APLNR	1.57147	1.08325e-15	5.46979e-15
GGACT	1.44602	8.47437e-27	1.31291e-25
COL4A2	2.38037	2.99775e-30	7.14627e-29
SLC37A2	1.25126	4.16308e-25	5.30834e-24
ANXA1	3.43234	5.89799e-50	2.65174e-46
ADAM19	1.43906	7.07104e-15	3.30609e-14
HAVCR2	1.19762	4.14994e-26	5.94589e-25
OASL	2.33678	4.97263e-27	7.92238e-26
CCDC146	1.1637	3.96129e-15	1.88825e-14
HILPDA	1.00856	7.66577e-19	5.19839e-18
TES	1.27459	1.56062e-22	1.50893e-21
MDFIC	1.33798	2.52971e-18	1.63226e-17
ADGRB3	-1.16418	7.11922e-39	7.34129e-37
HTR1B	-1.27692	1.32872e-08	3.45953e-08
LMO2	1.18278	1.2136e-28	2.31005e-27
CD63	1.1003	3.50484e-47	5.1798e-44
AVIL	1.14567	0.0039591	0.00571323
ITGA7	1.5347	8.43841e-23	8.41968e-22
TESPA1	-2.59437	0.00265014	0.00391997
RDH5	1.4644	2.70148e-20	2.10144e-19
TROAP	1.15951	1.38767e-06	2.96137e-06
FAIM2	-1.05573	3.42874e-29	7.0909e-28
ESPL1	1.11174	5.69533e-07	1.26251e-06
KCNH3	-1.02005	0.000106157	0.000185452
PKIB	1.86835	4.56495e-18	2.87532e-17
EGR4	-1.02998	0.000169609	0.0002892
EMX1	-1.45641	5.10785e-07	1.13872e-06
CPM	1.1723	3.78757e-12	1.37998e-11
KIAA0513	-1.0275	1.13468e-14	5.21093e-14
CCDC102A	1.03607	4.59504e-34	1.949e-32
NIBAN1	2.15515	3.14555e-39	3.50059e-37
LAMC1	1.49758	1.43538e-26	2.16997e-25
GPR55	1.66701	2.04688e-20	1.61169e-19
SP110	1.03608	4.40334e-37	3.16257e-35
PAX3	2.96381	1.84891e-14	8.32437e-14
TMBIM1	1.3537	7.5212e-39	7.68529e-37
CYP27A1	1.17865	1.82394e-24	2.15234e-23
GPR45	-1.46237	1.93752e-28	3.60857e-27
CNMD	2.35656	1.02684e-09	2.98428e-09
PHF11	1.01193	8.23368e-31	2.12263e-29
SPRY2	1.09966	8.25897e-22	7.46229e-21
LCP1	1.05752	1.0317e-18	6.90666e-18
IGF2BP3	2.83276	1.2451e-19	9.09058e-19
GPNMB	2.11147	9.18997e-25	1.12156e-23
IL6	2.68236	1.973e-20	1.5557e-19
DGKB	-1.27191	5.85217e-27	9.22558e-26
MYO1G	2.09188	1.1351e-29	2.49922e-28
MMD2	-1.57111	1.61857e-26	2.42732e-25
AL355922.1	1.61011	2.99967e-12	1.10346e-11
ADAMTS7	1.39531	6.53986e-16	3.36961e-15
ALPK3	1.6052	1.02803e-24	1.24583e-23
MYCBPAP	1.75578	4.06007e-16	2.12504e-15
CHAD	1.487	0.000112732	0.000196314
BRIP1	1.11933	2.7617e-05	5.13941e-05
RTP4	1.07614	3.43485e-22	3.20662e-21
SCN2A	-1.65745	4.0463e-22	3.74787e-21
TBR1	-1.85673	6.68306e-08	1.63054e-07
GALNT5	4.65068	1.58326e-24	1.88316e-23
SCN7A	1.46132	8.26443e-06	1.62713e-05
BLK	-1.2506	7.77963e-09	2.07802e-08
GATA4	4.82817	2.73933e-19	1.93527e-18
HLX	1.17147	6.73866e-20	5.05624e-19
IL10	1.53878	1.21236e-17	7.36192e-17
IL1RN	1.66309	8.34231e-15	3.8803e-14
GAD2	-1.74336	5.07116e-09	1.37964e-08
STXBP1	-1.45056	8.05761e-32	2.40232e-30
ANGPTL2	-1.25137	2.25764e-23	2.38048e-22
KIF12	-1.36513	2.21467e-05	4.16791e-05
WDR38	3.79078	3.43136e-22	3.20469e-21
GABBR2	-1.24864	1.19969e-20	9.63872e-20
CCL21	3.62672	0.0206295	0.0271676
SIT1	2.77741	4.6133e-35	2.36234e-33
CD72	1.48979	7.17731e-19	4.88631e-18
IGFBPL1	-1.33016	2.3286e-15	1.13748e-14
GMPR	1.56359	4.84721e-20	3.68499e-19
FGFBP2	1.40135	7.5311e-11	2.43947e-10
FHDC1	-1.18802	1.90621e-16	1.02935e-15
TLR2	1.53962	2.92794e-29	6.11712e-28
MGARP	1.4647	3.7679e-08	9.3948e-08
TTC29	2.16071	0.0192068	0.0253806
MYO7A	1.01126	2.58866e-23	2.71297e-22
PI15	1.04192	1.62909e-10	5.10768e-10
SULF1	1.52834	4.23378e-06	8.60851e-06
MMP7	1.92539	4.91593e-08	1.21313e-07
CFAP300	1.37347	9.76983e-07	2.12015e-06
FXYD6	-1.13117	4.15054e-35	2.14492e-33
FXYD2	-1.81917	3.98269e-29	8.15399e-28
CASP1	1.64932	3.65428e-38	3.27283e-36
CASP5	1.74489	9.55916e-24	1.04164e-22
UNC13C	-2.10744	1.70891e-14	7.72673e-14
SQOR	1.57688	8.36577e-42	1.72534e-39
THBS1	2.24743	9.97147e-08	2.38619e-07
KIF23	1.36023	1.1501e-08	3.01296e-08
STRA6	2.25758	3.4095e-13	1.36891e-12
CYP19A1	1.28419	6.69087e-16	3.44371e-15
IFI44L	1.2532	7.10144e-10	2.09255e-09
IFI44	1.46705	2.40447e-31	6.75656e-30
DNASE2B	1.18477	5.40913e-10	1.60822e-09
EMILIN1	1.79855	3.11357e-46	2.97529e-43
SIX3	3.04923	0.0003615	0.000595132
MYOF	1.69224	5.92588e-30	1.34832e-28
LOXL4	2.16215	1.58334e-25	2.1174e-24
DUSP5	1.25387	9.09696e-14	3.84543e-13
CEP55	1.12957	6.58081e-14	2.82214e-13
RBP4	-1.26942	7.90477e-05	0.000139932
ADAMTS14	1.36369	3.20174e-09	8.86503e-09
TET1	-1.09884	1.5586e-34	7.29966e-33
AOX1	2.16628	2.82535e-23	2.94766e-22
CHRNA1	3.57012	3.85448e-16	2.02072e-15
PARP9	1.36635	1.82196e-37	1.44727e-35
HERC6	1.02171	3.97926e-16	2.08517e-15
HERC5	1.46366	1.04182e-33	4.15249e-32
NDST4	-3.36579	7.69914e-41	1.28205e-38
PRKG2	-2.00845	6.09018e-29	1.20943e-27
GPAT3	1.06096	1.66662e-09	4.74449e-09
MMRN1	1.33272	5.14915e-13	2.03469e-12
TRPC3	-1.02439	8.24588e-17	4.61802e-16
CXCL9	3.00401	5.56523e-26	7.87823e-25
SHROOM3	2.04861	1.04036e-16	5.75757e-16
CENPE	1.45723	8.67584e-11	2.7934e-10
ENPEP	1.23329	1.16582e-10	3.71166e-10
CASP6	1.30105	1.48993e-44	6.97782e-42
MTTP	1.67573	5.79856e-12	2.07831e-11
SHISAL1	-2.08452	9.79781e-30	2.17428e-28
PARVG	1.40185	1.82421e-33	6.97419e-32
ERP27	2.01559	1.73257e-27	2.93064e-26
C1RL	2.29595	2.18701e-50	1.2291e-46
AMIGO2	1.96955	1.12455e-22	1.10489e-21
PPFIA2	-1.14756	7.54661e-19	5.12067e-18
GLIPR1	1.37142	1.70519e-21	1.49503e-20
LGR5	-1.09466	3.75485e-21	3.16731e-20
DUSP6	1.11435	7.18725e-16	3.68627e-15
LUM	2.44938	3.11323e-16	1.64517e-15
GAS2L3	1.54305	7.50846e-18	4.63728e-17
TMEM132B	-1.01273	6.33109e-19	4.33779e-18
FAM222A	-1.06088	2.07806e-25	2.73666e-24
GPR84	1.6584	6.86776e-24	7.6316e-23
BRCA2	1.01907	2.24591e-11	7.58194e-11
ITGB7	1.24651	1.43063e-18	9.45896e-18
LPAR6	1.20931	9.8338e-33	3.29946e-31
MORN3	1.81332	4.67816e-18	2.94415e-17
SRRM4	-2.21913	1.79334e-27	3.02433e-26
ZIC5	1.16217	3.76708e-16	1.97675e-15
SSTR1	-1.64457	1.81957e-30	4.46063e-29
MDGA2	-1.49536	4.66661e-35	2.37881e-33
RTN1	-1.18548	1.94037e-29	4.15028e-28
SYT16	-1.51255	6.05943e-14	2.6075e-13
SLC38A6	1.00404	4.11669e-13	1.63882e-12
GPR65	2.0721	2.10337e-37	1.63611e-35
AK7	1.7361	9.09551e-06	1.78236e-05
FAM181A	2.08682	3.63759e-29	7.48837e-28
FBLN5	1.61302	1.32569e-29	2.89615e-28
WARS1	1.15224	1.86074e-21	1.62067e-20
TCF12	-1.08748	1.38586e-28	2.61361e-27
BCL2A1	1.74255	5.0403e-24	5.6909e-23
CYP11A1	1.40785	0.000175546	0.000298942
CYP1A1	-1.37799	1.11912e-19	8.20812e-19
WDR93	1.20486	3.31533e-07	7.5289e-07
IQGAP1	1.37961	1.05454e-36	7.03446e-35
ITGAX	1.06544	5.25311e-21	4.36884e-20
IGSF6	1.02961	6.11609e-19	4.20201e-18
NKD1	-1.32888	4.37529e-28	7.85596e-27
MARVELD3	-1.09856	1.96365e-08	5.02479e-08
CLEC18B	2.11638	5.28671e-31	1.4182e-29
NLRC5	1.33948	6.3679e-30	1.44307e-28
ADAMTS18	1.77118	2.57666e-12	9.55831e-12
TOM1L1	1.83158	7.66212e-12	2.71384e-11
SKAP1	2.45229	6.41208e-24	7.14289e-23
LRRC46	1.72693	9.06726e-21	7.36146e-20
RHBDL3	-1.01705	2.28017e-20	1.78662e-19
IMPA2	1.10264	1.13375e-32	3.76464e-31
GNAL	-1.319	3.73236e-32	1.1621e-30
GREB1L	-1.00462	6.0848e-18	3.79014e-17
PIK3R5	1.17187	7.23535e-25	8.93194e-24
CCDC40	1.44764	1.06974e-24	1.29498e-23
SLC16A3	1.61387	3.77421e-34	1.64109e-32
SECTM1	1.89794	2.17206e-23	2.29347e-22
RNF165	-1.22366	1.84345e-34	8.5094e-33
CBLN2	-2.13385	1.21359e-28	2.31005e-27
IGFBP4	1.12337	7.87054e-12	2.7841e-11
FKBP10	1.15601	8.52772e-24	9.34681e-23
CACNA1A	-1.05113	2.62145e-22	2.48127e-21
VAV1	1.13467	3.91283e-24	4.45143e-23
IFITM3	1.55344	6.51569e-35	3.21918e-33
COL6A1	1.05693	3.5628e-13	1.42842e-12
COL6A2	2.82324	1.55313e-26	2.3401e-25
EMP3	3.68065	1.51925e-49	4.87897e-46
MYO1F	1.29708	5.69975e-33	1.98041e-31
FBN3	1.02955	0.00103434	0.00161159
SLC47A1	1.60608	4.42075e-14	1.92259e-13
SIGLEC10	1.17769	1.90961e-19	1.36888e-18
RCN3	1.01058	2.44918e-21	2.10224e-20
MMEL1	1.74105	7.13216e-19	4.85741e-18
FHAD1	1.93774	1.10606e-13	4.64143e-13
EPHA2	1.45071	8.21235e-19	5.56065e-18
DMRTA2	4.15494	2.95198e-17	1.7296e-16
MAP3K6	1.22459	8.85807e-35	4.31016e-33
FCN3	1.1067	1.21456e-12	4.63238e-12
HSPG2	1.6592	1.65173e-15	8.19487e-15
CCN1	1.25209	4.27896e-13	1.70129e-12
KIF2C	1.16347	4.87977e-15	2.31136e-14
BEST4	1.84955	8.31545e-19	5.62199e-18
FNDC7	2.54734	2.01343e-12	7.52485e-12
C1orf162	1.2216	4.0287e-25	5.1399e-24
CD53	1.14416	8.17257e-24	8.98384e-23
FCGR2A	1.65419	2.02391e-36	1.27802e-34
CRABP2	1.28784	0.00700142	0.00978501
RGS16	1.76144	4.8426e-27	7.72616e-26
FAM163A	-1.80686	4.25384e-18	2.6872e-17
ADAMTSL4	1.6423	3.37488e-29	6.9863e-28
CTSK	1.16481	1.13372e-08	2.97213e-08
DYRK3	1.24576	3.47924e-34	1.5187e-32
DUSP10	1.07079	3.13159e-25	4.05753e-24
S100A8	1.67683	3.45549e-15	1.65452e-14
SLC27A3	1.21476	9.49598e-21	7.68429e-20
LEFTY2	1.26757	2.3227e-10	7.16247e-10
ETNK2	1.35822	2.31865e-06	4.84193e-06
PTPN7	2.04416	1.35214e-36	8.81047e-35
SYT2	-1.61408	3.75299e-08	9.36269e-08
OSR1	1.04059	0.00217176	0.00324718
GALM	1.16439	2.16952e-41	4.13312e-39
ANKRD53	1.81032	2.69271e-20	2.09599e-19
ST6GAL2	-1.06527	6.86592e-16	3.52872e-15
THNSL2	1.15513	3.13097e-06	6.45195e-06
FBLN7	1.46399	2.79048e-08	7.04601e-08
CNGA3	2.077	1.07122e-14	4.93259e-14
GPR17	-1.38006	2.61252e-22	2.47386e-21
GALNT13	-1.55206	2.27688e-35	1.23336e-33
SCN1A	-1.03045	5.03118e-25	6.35758e-24
SLC4A10	-1.81469	1.98361e-12	7.41834e-12
TMEFF2	-1.41478	8.49377e-34	3.39751e-32
UNC80	-1.54428	3.8572e-36	2.34986e-34
PTH2R	-1.42597	3.24351e-10	9.87234e-10
NYAP2	-2.42014	2.2279e-31	6.27608e-30
TRPM8	4.02272	5.75738e-35	2.88254e-33
CPNE9	-1.85335	1.4268e-10	4.50611e-10
MARCHF4	-2.30157	4.55756e-27	7.30249e-26
GRIP2	-1.46952	2.96951e-18	1.90242e-17
CNTN4	-1.61978	1.45602e-19	1.05483e-18
STAC	3.80115	7.62326e-18	4.70541e-17
NFKBIZ	1.28987	5.41061e-20	4.0953e-19
COL8A1	3.54122	3.74766e-28	6.78867e-27
ADGRG7	1.00528	8.68622e-12	3.05964e-11
TAGLN3	-1.30065	2.94351e-21	2.50644e-20
ADPRH	1.32206	6.38867e-40	8.25386e-38
AC062028.1	-1.55502	0.0033324	0.00486507
VWA5B2	-1.10937	1.26396e-21	1.12219e-20
OCIAD2	2.21195	2.74083e-22	2.58664e-21
SLC10A4	1.12454	0.0154307	0.0206269
SLC10A6	2.06768	1.6832e-11	5.74877e-11
PLAC8	2.30551	9.83607e-30	2.18062e-28
SNCA	-1.14276	3.75157e-06	7.66823e-06
DDIT4L	2.91648	1.40571e-19	1.02003e-18
TIFA	1.33002	3.80639e-36	2.32521e-34
CCNA2	1.04802	1.02826e-07	2.45671e-07
SFRP2	-1.82965	5.847e-20	4.41372e-19
GLRA3	-2.89297	2.95726e-43	8.74726e-41
ROPN1L	3.33798	9.08349e-12	3.19457e-11
CDH18	-1.8384	8.80024e-27	1.36246e-25
OSMR	2.08112	1.40237e-35	7.82268e-34
SHISAL2B	-2.94104	2.55744e-12	9.49485e-12
GZMA	2.40939	4.90334e-30	1.12707e-28
HAPLN1	-1.65386	1.16009e-22	1.13633e-21
LHFPL2	1.11795	4.37777e-29	8.92226e-28
IQGAP2	2.00577	6.94375e-33	2.38314e-31
TNFAIP8	2.23164	6.21247e-40	8.07262e-38
MEGF10	1.01161	2.72958e-07	6.25621e-07
ADAMTS19	-1.04688	1.16378e-19	8.52455e-19
CXCL14	1.56031	7.44338e-09	1.99151e-08
SLC25A48	-1.15497	3.53215e-17	2.04964e-16
IL9	-1.73054	2.9626e-20	2.29891e-19
TIMD4	2.03709	7.43751e-09	1.99042e-08
GABRB2	-2.52511	4.38542e-14	1.9076e-13
GLRA1	-2.18994	1.43865e-23	1.54297e-22
CPLX2	-1.99359	1.56483e-26	2.35457e-25
KCNMB1	1.15879	3.08827e-17	1.80417e-16
GFOD1	-1.05482	3.70337e-14	1.62443e-13
LRRTM2	-1.05654	4.91307e-28	8.79348e-27
GFRA3	2.48206	0.00390421	0.00564017
DCDC2	2.16496	5.05363e-12	1.82155e-11
DOK3	1.40309	8.67236e-33	2.92286e-31
HMGCLL1	-1.31179	7.17364e-18	4.44129e-17
CYP39A1	1.09691	7.40502e-10	2.1786e-09
TPBG	1.01415	0.000228242	0.000384451
PRSS35	-1.16557	1.35282e-19	9.85142e-19
FAXC	-1.15797	1.84422e-36	1.17445e-34
CLVS2	-1.5393	3.15354e-17	1.83895e-16
GPR6	-1.89481	2.5322e-16	1.34955e-15
ARHGAP18	1.49264	1.70289e-36	1.09062e-34
ABRACL	1.01782	7.05653e-31	1.84669e-29
VIP	-1.68903	1.4399e-08	3.7356e-08
IGFBP3	1.87279	1.33491e-16	7.3174e-16
ZC3HAV1L	1.21951	9.02276e-09	2.39218e-08
EPHA1	1.26603	3.42509e-23	3.547e-22
DENND2A	1.09944	3.72822e-22	3.46611e-21
MSN	2.01961	6.16014e-44	2.16375e-41
IL2RG	2.07935	3.36872e-35	1.75705e-33
GPC3	1.30274	9.08098e-06	1.77978e-05
DOK2	1.54105	6.18986e-14	2.66268e-13
STAR	-1.66234	5.30791e-32	1.63231e-30
PXDNL	1.23988	9.2954e-07	2.02272e-06
CRH	-1.6037	7.59671e-08	1.84222e-07
SLC26A7	1.57195	1.21928e-05	2.35866e-05
MAL2	-2.12679	1.34426e-10	4.25385e-10
PLIN2	1.08604	2.08374e-29	4.43164e-28
SHC3	-1.25104	0.000259844	0.000434652
PLPPR1	-1.22934	6.15247e-26	8.67676e-25
CRB2	1.82915	5.29415e-25	6.66737e-24
GBGT1	1.16121	1.69009e-31	4.87092e-30
LCN9	-1.25985	5.11923e-07	1.14099e-06
CACNA1B	-1.91949	2.73491e-21	2.33589e-20
FAM13C	-1.17712	1.0298e-39	1.279e-37
CDHR1	-1.93892	2.01745e-43	6.38764e-41
RGR	-2.31492	1.47115e-36	9.53068e-35
LRMDA	1.06116	3.46947e-29	7.16853e-28
GLUD1	-1.02594	1.47506e-37	1.18005e-35
HABP2	1.84286	2.22086e-06	4.64462e-06
PLEKHS1	2.65213	2.33642e-16	1.24918e-15
INA	-2.44834	9.57357e-38	7.94147e-36
ADAM12	3.04263	1.40704e-29	3.06197e-28
ADM	1.63945	2.0547e-19	1.46727e-18
PAMR1	1.46973	5.20231e-13	2.0546e-12
SERPING1	2.51826	1.41853e-44	6.93228e-42
CCDC81	1.6289	4.56081e-23	4.66881e-22
KLHL35	-1.31004	1.10776e-25	1.51291e-24
SERPINH1	1.8764	1.43108e-40	2.2497e-38
CAPN5	1.28426	1.12841e-25	1.5383e-24
TTC12	1.95611	8.74586e-26	1.2084e-24
HTR3B	-2.56999	1.17094e-06	2.52109e-06
P4HA3	1.36663	3.70301e-14	1.62443e-13
ST14	1.71339	2.82294e-19	1.99245e-18
ADAM33	2.2499	8.10423e-10	2.37931e-09
MPZL2	1.28838	9.08119e-16	4.61353e-15
SCN2B	-1.36795	4.22317e-17	2.43428e-16
CDH22	-1.17119	4.08074e-21	3.43063e-20
FERMT3	1.33293	1.42088e-32	4.66297e-31
TLCD3B	-1.5404	2.4649e-41	4.50495e-39
DOC2A	-1.50747	2.03183e-09	5.7302e-09
MPP7	-1.11368	1.68205e-10	5.26425e-10
FRMPD2B	-1.73017	7.55646e-10	2.22225e-09
PCDH15	-1.54739	1.05306e-27	1.8238e-26
CTF1	1.65447	1.23484e-33	4.86156e-32
FCGR1A	1.05284	1.88962e-16	1.02112e-15
KLHL1	-1.9471	3.06668e-08	7.71301e-08
CDH8	-1.23801	2.34896e-08	5.97675e-08
LATS2	1.5559	6.17077e-31	1.63584e-29
CD226	1.33769	2.02408e-24	2.37729e-23
FSIP1	1.1554	1.98312e-21	1.71926e-20
DLG2	-1.14935	7.89371e-21	6.4551e-20
PRSS23	1.6387	9.39431e-19	6.31536e-18
PPP1R1C	1.35607	3.04265e-09	8.43916e-09
PIH1D2	1.13331	1.68341e-22	1.62138e-21
IL18	1.36234	4.9264e-29	9.95018e-28
C2orf50	1.96495	1.71406e-09	4.87572e-09
FREM2	1.54254	4.94614e-08	1.21958e-07
SEC24D	1.18568	2.13426e-23	2.25779e-22
GPR158	-1.01906	9.49287e-23	9.41331e-22
ANK3	-1.14306	1.01655e-13	4.27939e-13
SLC2A13	-1.37333	1.27569e-27	2.18912e-26
VENTX	1.58281	1.43723e-20	1.14611e-19
CENPU	1.17398	2.49171e-07	5.73148e-07
CCDC122	1.11585	1.34264e-16	7.35623e-16
TDO2	1.12353	7.27626e-06	1.44306e-05
GFRA1	-1.21839	1.09097e-29	2.40677e-28
GLT1D1	-1.26731	2.90978e-09	8.09653e-09
TMEM132D	-1.64828	3.82002e-11	1.26439e-10
MCHR2	-2.59835	7.27439e-13	2.83117e-12
KCNE4	1.48642	1.041e-15	5.26356e-15
AP1S3	1.11306	3.70243e-22	3.44528e-21
GRID2	-1.10255	2.33675e-25	3.05586e-24
ARL11	1.22457	4.22555e-28	7.61752e-27
PSTPIP2	1.36709	2.72574e-21	2.32895e-20
G6PC2	-3.27437	1.2726e-25	1.72234e-24
KCNK13	1.05828	1.31966e-18	8.74069e-18
CAMK4	-1.42421	1.02527e-12	3.93581e-12
GRIA4	-1.28017	8.98569e-37	6.12116e-35
SPEF2	1.19131	0.0131623	0.0177477
MEPE	-1.76802	0.00238767	0.00355039
CCNO	1.87147	0.010301	0.0140833
CLEC4F	-1.18389	8.88145e-14	3.75998e-13
TCTEX1D1	4.38253	1.99532e-24	2.3461e-23
DNAI4	1.98611	1.39385e-30	3.4623e-29
ANKRD22	1.47191	7.03117e-21	5.7793e-20
SLC16A12	1.6688	0.00176736	0.00267508
PRDM8	-1.03845	2.46762e-17	1.45749e-16
PART1	-1.59505	0.003234	0.00473004
RAB3C	-2.24968	5.25576e-30	1.20438e-28
NRSN1	-2.00309	2.41728e-37	1.84831e-35
MR1	1.10813	6.26697e-30	1.42305e-28
BANK1	2.13003	3.58499e-20	2.75806e-19
CLGN	-1.11003	2.12717e-28	3.9487e-27
PTPRR	-1.88506	1.11786e-13	4.68835e-13
PLA2R1	1.84765	3.95888e-06	8.0707e-06
RBMS1	1.20698	5.67588e-33	1.98041e-31
SCN3A	-1.56287	2.39592e-34	1.07505e-32
FEZF2	-1.13364	6.4014e-10	1.89197e-09
CD96	2.46654	9.30471e-32	2.76314e-30
SLC25A27	-1.13271	3.82301e-34	1.6591e-32
FAM81B	4.06687	1.12803e-12	4.31701e-12
PLEKHG4B	1.9283	6.22485e-06	1.24353e-05
C16orf89	1.34512	2.53146e-10	7.77738e-10
CMTM7	1.21479	1.355e-30	3.36951e-29
CD8A	1.48646	1.27188e-13	5.30469e-13
CIBAR2	5.56673	7.24464e-22	6.58284e-21
SPHKAP	-2.60459	5.82736e-42	1.23584e-39
PID1	-1.47506	1.28584e-39	1.56247e-37
MCOLN2	1.94025	6.10717e-22	5.58313e-21
LGI4	1.45695	2.08637e-05	3.93998e-05
CACNA2D1	-1.206	1.20141e-25	1.63386e-24
HS3ST3A1	1.555	0.0202708	0.0267162
SEMA3D	-1.07924	2.45487e-16	1.30989e-15
AK5	-1.15305	7.44504e-06	1.47432e-05
JPH3	-1.91049	1.2466e-41	2.5021e-39
NRGN	-1.6904	2.26545e-07	5.23084e-07
CDH12	-1.51527	6.36836e-13	2.49192e-12
ANGPT1	1.74218	7.7802e-14	3.31185e-13
CEP112	1.43362	1.75782e-28	3.29023e-27
GBP5	3.20303	2.9924e-38	2.73452e-36
GPR26	-2.50258	3.79228e-10	1.14538e-09
CCDC173	1.07021	1.25593e-08	3.27799e-08
PDLIM3	1.16692	7.43787e-16	3.81047e-15
LY96	1.5284	6.58883e-29	1.30155e-27
CHODL	2.76902	3.08085e-11	1.02726e-10
ADAMTS1	1.29034	2.38819e-15	1.16457e-14
SLFN13	1.65506	1.93652e-14	8.69822e-14
SKA1	1.22366	7.16738e-08	1.74451e-07
USP43	-1.3173	2.39952e-28	4.42503e-27
EPHB1	-1.16494	7.46937e-31	1.93893e-29
CA10	-1.4874	1.4074e-22	1.36725e-21
VOPP1	1.38623	8.22593e-14	3.49497e-13
SEPTIN14	8.46125	0.0143973	0.0193133
CNTNAP5	-1.74653	9.42557e-25	1.14782e-23
MARVELD1	1.61398	1.11732e-29	2.46249e-28
SAMSN1	1.09912	6.17403e-19	4.23793e-18
RHOC	1.04047	5.50472e-37	3.89139e-35
SLC7A7	1.25183	1.65819e-32	5.40234e-31
LRGUK	1.90525	1.76567e-24	2.08906e-23
PIK3AP1	1.02038	1.69045e-14	7.65229e-14
VSIG4	1.07026	1.23016e-12	4.68869e-12
PDIA4	1.12512	1.69528e-38	1.62169e-36
FLACC1	1.00701	1.14455e-10	3.64751e-10
FZD7	1.03793	4.32776e-12	1.56891e-11
SPAG17	4.66514	5.72769e-18	3.57662e-17
SLA	1.29882	9.48673e-26	1.30435e-24
AFF2	-1.63737	1.31757e-34	6.23557e-33
MICU3	-1.06011	7.79587e-32	2.33047e-30
GRIP1	-1.05156	1.13236e-22	1.11159e-21
KIF5A	-1.25572	1.57225e-17	9.44778e-17
WIF1	-1.35535	5.27637e-05	9.51948e-05
GPR61	-1.17316	9.30298e-30	2.07471e-28
BATF	2.13906	1.66179e-33	6.42265e-32
ADAMTS3	2.4231	4.3502e-14	1.89337e-13
CFAP161	3.07209	1.35037e-09	3.88287e-09
SLC28A1	1.59405	1.72296e-15	8.52193e-15
MAP3K7CL	2.44689	6.1993e-33	2.13743e-31
SORCS3	-1.11141	3.0579e-29	6.37086e-28
KCNS2	-2.0127	3.39519e-07	7.70403e-07
CD109	1.82484	1.24075e-23	1.33711e-22
RAB11FIP1	1.04286	0.000145518	0.000250019
FBXO32	1.13215	2.12114e-19	1.51231e-18
FRRS1	1.84221	1.47154e-40	2.29724e-38
B3GNT7	1.87353	2.70015e-30	6.47114e-29
BUB1B	1.3914	0.000390741	0.000640689
NMNAT2	-1.65789	6.7768e-34	2.77491e-32
RBPMS	1.3435	3.05795e-22	2.87393e-21
SYN2	-1.62009	2.02788e-13	8.32483e-13
HTR5A	-2.23357	1.81017e-13	7.46244e-13
MMP14	1.82146	2.22759e-38	2.06927e-36
FZD1	1.28634	2.26201e-30	5.48543e-29
ZFHX2-AS1	-1.14625	4.09814e-27	6.60402e-26
C1orf158	4.35408	8.00575e-13	3.10452e-12
ARSL	1.12405	1.34439e-14	6.13765e-14
HYDIN	1.72999	0.000943526	0.00147901
CACNA2D3	-1.37719	2.96957e-18	1.90242e-17
FAM81A	-1.13013	2.77133e-13	1.12272e-12
PWWP3B	-1.58559	9.83997e-18	6.02076e-17
AFAP1L1	1.21207	1.27688e-09	3.67815e-09
LCA5L	1.0618	1.00464e-09	2.92169e-09
MX1	2.08189	9.67377e-29	1.87148e-27
SNX22	-1.2528	5.44464e-19	3.74757e-18
SLC34A2	1.45689	2.39771e-16	1.2806e-15
CABP1	-1.8066	2.51439e-25	3.27672e-24
GAREM2	-1.07917	2.46345e-32	7.86623e-31
DRC1	3.95771	9.54085e-15	4.41404e-14
TNFRSF14	1.49223	2.87888e-37	2.13588e-35
MEGF11	-1.66341	3.61877e-31	9.92072e-30
CFAP251	1.38843	2.52091e-12	9.36443e-12
GALNT14	-1.22003	2.54349e-28	4.67138e-27
HPD	3.41789	6.72661e-37	4.66711e-35
LRRC43	1.13076	2.62888e-05	4.90393e-05
XKR8	1.91951	1.97705e-33	7.49477e-32
TENT5B	2.49249	2.73876e-27	4.5041e-26
COLEC12	1.86424	1.46103e-20	1.16385e-19
SLC13A3	1.09486	8.89336e-09	2.35953e-08
CDC25C	1.11705	6.11326e-06	1.22222e-05
RIBC1	1.66198	2.16765e-18	1.40998e-17
CATIP	2.60689	9.95122e-17	5.52713e-16
KCNB1	-1.18238	4.02447e-34	1.73314e-32
NCF1	1.68256	3.90337e-40	5.35048e-38
DYNC1I1	-1.09175	4.07668e-10	1.22666e-09
TAGLN2	2.22908	9.73744e-44	3.21908e-41
SLAMF8	2.17187	3.55529e-25	4.56963e-24
DUSP23	1.0311	8.10917e-28	1.41533e-26
HTR6	-1.71381	9.80101e-17	5.44554e-16
F11R	1.46234	1.14014e-39	1.40057e-37
NPM2	-1.5105	8.09548e-13	3.13661e-12
FCER1G	1.47293	2.73807e-33	1.01403e-31
APOA2	2.46773	0.018204	0.0241146
STC1	2.31317	1.05689e-12	4.05304e-12
HOXB13	3.73463	4.85016e-14	2.10324e-13
C1QC	1.37447	1.77101e-26	2.64357e-25
RCAN1	1.12025	1.12715e-19	8.26431e-19
CLIC6	4.33462	4.9789e-13	1.96948e-12
RUNX1	1.81461	8.36818e-31	2.15483e-29
CBR1	1.2248	2.4241e-19	1.72013e-18
GJD2	-2.8401	1.91753e-26	2.85282e-25
CHAF1B	1.12356	3.04463e-11	1.01563e-10
HK2	1.0717	1.4074e-22	1.36725e-21
C1R	2.69612	1.11236e-50	1.16599e-46
CELF3	-1.77221	8.35036e-34	3.35207e-32
ISL2	3.36466	3.95939e-22	3.6704e-21
ADGRG5	1.28834	9.03375e-17	5.03917e-16
DRC7	2.22333	7.22807e-16	3.70637e-15
ACE	1.2782	8.48215e-08	2.0468e-07
SPON2	1.51497	2.14994e-20	1.68816e-19
LRRC36	1.45991	2.45272e-17	1.44907e-16
TPPP3	1.88547	9.51448e-12	3.33623e-11
ZDHHC1	1.08863	4.71762e-29	9.5715e-28
CARMIL2	-1.09882	5.08889e-11	1.6698e-10
ZYX	1.21573	1.0177e-36	6.80893e-35
PTGIR	1.20492	5.0808e-18	3.18951e-17
TFF3	1.50815	3.1149e-12	1.14454e-11
TMPRSS3	1.36622	2.39854e-06	5.00086e-06
RSPH1	1.90759	4.02236e-10	1.21096e-09
HSF2BP	-1.2971	4.05092e-30	9.40751e-29
GAB3	1.02494	1.3967e-28	2.63184e-27
ITGB2	1.40157	3.49211e-30	8.22878e-29
HIPK4	-1.85198	2.36787e-08	6.02283e-08
CFAP157	1.2246	1.07507e-06	2.32404e-06
ZDHHC12	1.27698	7.55587e-45	4.35528e-42
NLRP4	1.0363	4.99033e-05	9.02734e-05
JAML	1.20881	8.80242e-12	3.09863e-11
SHC1	1.00692	2.55936e-22	2.42659e-21
CHRNB2	-1.73044	2.50496e-31	7.0039e-30
LMNA	1.04889	2.71604e-37	2.03522e-35
CCR5	2.01493	5.42648e-30	1.24223e-28
LRRC71	1.98363	0.0105525	0.0144069
HK3	1.87244	1.43646e-21	1.26832e-20
CELF5	-1.44615	3.92651e-31	1.07382e-29
USP41	-1.78568	5.89903e-30	1.34357e-28
IKZF3	2.37507	3.99713e-26	5.74157e-25
ITGA5	1.636	4.98989e-37	3.54977e-35
CD300LG	-1.56776	1.17387e-10	3.73577e-10
SHANK1	-1.71422	3.29598e-25	4.2607e-24
AQP5	3.58042	2.5122e-13	1.02179e-12
SPC24	1.16641	2.48284e-05	4.64733e-05
TREML1	1.09283	1.9096e-19	1.36888e-18
SCIMP	1.4755	4.0382e-32	1.25385e-30
ASGR2	1.21881	2.01821e-17	1.19993e-16
SSTR5	-1.64074	5.83833e-25	7.31174e-24
SHANK2	-2.13758	4.20357e-46	3.49986e-43
GNG3	-1.06792	0.00205318	0.00307786
SLC25A45	1.14119	9.7106e-33	3.26299e-31
PDZK1IP1	1.94215	7.30305e-19	4.9614e-18
ELAVL4	-1.40163	1.28871e-31	3.78694e-30
AK4	1.05445	3.52536e-12	1.28757e-11
FBLIM1	1.40611	4.71205e-09	1.28474e-08
DRAXIN	1.25258	4.97963e-07	1.11197e-06
PDPN	3.38766	8.58857e-45	4.70905e-42
LAPTM5	1.18324	7.28808e-25	8.99209e-24
SYNC	1.858	3.34221e-22	3.12668e-21
TMCO4	1.42643	1.10735e-36	7.36487e-35
UBXN10	2.21233	4.41185e-05	8.02544e-05
MXRA8	1.10545	3.53436e-30	8.31092e-29
DIRAS3	2.31073	8.09162e-30	1.81718e-28
C1orf87	3.42404	4.5699e-33	1.6255e-31
NEXN	1.24878	2.69988e-23	2.82426e-22
B3GALT2	-1.00364	1.02897e-25	1.41044e-24
NTNG1	1.04634	6.0973e-10	1.80661e-09
DNAI3	3.13483	4.23026e-20	3.23262e-19
GBP2	2.06591	3.49431e-25	4.4964e-24
GBP4	1.11758	1.60676e-12	6.06449e-12
VCAM1	1.02987	7.35115e-12	2.60941e-11
KCNJ9	-1.32447	2.57025e-25	3.34758e-24
SLAMF6	2.46404	7.61427e-29	1.48713e-27
OLFML2B	1.22646	1.50481e-13	6.24367e-13
ATF3	1.28137	1.91809e-24	2.26107e-23
DENND2D	1.95105	7.96433e-41	1.31646e-38
SPATA17	2.1376	5.66801e-24	6.35496e-23
C1orf115	-1.26257	8.72587e-05	0.000153656
MT2P1	1.08031	5.19751e-10	1.54817e-09
KLHDC8A	1.69116	8.95486e-17	4.99642e-16
OXER1	1.16385	1.02821e-16	5.70019e-16
HAAO	1.01292	1.76111e-20	1.39351e-19
LRRTM1	-1.23686	2.43885e-23	2.56073e-22
SLC66A3	1.09984	7.05431e-39	7.30787e-37
KCNJ3	-1.24619	4.21261e-14	1.83562e-13
NEUROD1	-1.25998	3.70275e-22	3.44528e-21
FRZB	1.38342	9.29968e-11	2.98738e-10
FBXO41	-1.30894	2.34915e-22	2.23482e-21
ACTG2	1.72383	6.27629e-09	1.69178e-08
VSNL1	-2.28559	3.02977e-09	8.41166e-09
EN1	3.20787	4.68717e-29	9.5183e-28
SPATA18	2.33259	1.6205e-09	4.62194e-09
CFAP221	1.05313	0.000575396	0.000924846
CTSS	1.41685	2.37174e-28	4.3774e-27
TNFAIP8L2	1.0546	2.60117e-21	2.22929e-20
S100A11	2.06135	8.54741e-48	1.58726e-44
SMCP	-1.81973	4.45981e-15	2.11914e-14
ARHGAP25	1.0735	3.23815e-27	5.28639e-26
S100A9	1.77167	1.41901e-17	8.57049e-17
C1orf189	1.18229	1.17107e-07	2.77961e-07
ANTXR2	1.38162	1.17719e-31	3.47288e-30
DAPL1	-2.07942	6.36671e-21	5.25803e-20
CLDN1	1.44098	1.23367e-06	2.64829e-06
COL6A3	2.89558	5.84594e-10	1.73355e-09
LINC01116	2.1241	0.000100375	0.000175666
IGFN1	-2.10486	2.12787e-19	1.51663e-18
PROK2	1.30802	0.00141437	0.00216869
FSTL1	2.15877	6.88034e-45	4.18027e-42
IGFBP7	1.21711	2.28135e-28	4.2175e-27
SERPINI1	-1.09671	8.97067e-07	1.95502e-06
NUAK2	1.76069	2.48158e-44	1.04328e-41
CTLA4	1.61985	1.52373e-13	6.31984e-13
NKX6-1	1.82436	4.63976e-10	1.38835e-09
SYNPR	-1.83986	5.18598e-10	1.54535e-09
PTX3	2.71754	7.71163e-33	2.63061e-31
RBM47	1.75555	3.04285e-33	1.11406e-31
CXCL1	1.72936	0.0212537	0.0279357
PLB1	1.25561	8.72815e-30	1.95039e-28
CDCP1	1.58337	3.08577e-31	8.51143e-30
CCR1	1.1181	2.11129e-17	1.25395e-16
LRRC2	1.48692	7.08576e-10	2.08847e-09
DTX3L	1.21726	4.10501e-33	1.47178e-31
NMNAT3	1.09092	1.5775e-13	6.53223e-13
DNALI1	1.42579	9.4183e-27	1.45414e-25
CFAP100	3.59593	1.76045e-10	5.49537e-10
RPL39L	1.32402	1.96533e-13	8.08134e-13
SGMS2	2.14437	1.00556e-27	1.74421e-26
SPRY1	1.88912	1.17258e-23	1.26851e-22
BSN	-1.68615	2.58954e-32	8.23378e-31
CAMKV	-1.77095	1.87784e-17	1.12092e-16
GRM2	-1.55173	2.66299e-12	9.8574e-12
ETNPPL	-1.07317	4.78422e-16	2.48957e-15
PITX2	4.48229	8.52405e-06	1.67559e-05
NDST3	-1.00061	1.70891e-14	7.72673e-14
HAND2	1.66894	2.83301e-10	8.66596e-10
ANXA5	1.31602	3.08921e-43	8.90326e-41
TMEM155	-1.71527	5.9824e-09	1.61659e-08
ASB5	1.93419	2.41747e-11	8.13786e-11
IL15	1.92261	1.95151e-33	7.42299e-32
FAM160A1	1.71271	0.004994	0.00711395
ITGA2	1.30816	2.93026e-15	1.41146e-14
ZNF474	2.4961	1.69482e-22	1.63167e-21
ADGRV1	-1.40066	1.72247e-21	1.50842e-20
F2RL2	2.66658	2.11308e-27	3.53964e-26
ANKRD33B	-1.18379	1.29364e-09	3.72548e-09
C5orf63	1.10858	2.60146e-16	1.38548e-15
F2RL1	1.25013	3.25333e-11	1.08236e-10
SCGB3A2	-2.31607	0.0203149	0.0267674
ESM1	2.87069	3.87571e-13	1.54808e-12
GPX8	3.33776	1.60741e-36	1.03242e-34
ERAP2	1.04841	1.59263e-05	3.04493e-05
CMYA5	2.60775	1.14976e-15	5.79391e-15
EGFLAM	1.19216	6.84092e-08	1.66805e-07
CARTPT	-2.74247	0.0126807	0.0171344
TLR3	1.16223	5.02411e-29	1.01112e-27
ACSL6	-1.15931	8.09462e-23	8.09102e-22
GRIK2	-1.26152	6.89867e-28	1.21633e-26
CGAS	1.41887	3.5775e-39	3.9043e-37
FABP7	1.38643	1.50738e-10	4.74792e-10
TXLNB	2.39852	2.74606e-24	3.17229e-23
ANKRD55	-1.90364	3.49248e-09	9.63324e-09
PI16	1.28239	3.03056e-12	1.11446e-11
HCN1	-2.18981	7.12216e-11	2.31067e-10
NEUROD6	-2.63114	3.75937e-12	1.36993e-11
PTTG1	1.3339	1.22265e-13	5.11258e-13
KCNK5	3.46568	1.8817e-17	1.12292e-16
STEAP1	1.5405	1.4384e-11	4.94878e-11
CDCA7L	1.17298	2.59147e-08	6.56557e-08
SP8	3.14543	0.0137499	0.0184877
USP49	-1.07729	5.76607e-32	1.76355e-30
SYTL3	1.35376	1.81218e-31	5.18954e-30
IQUB	1.64098	2.04394e-16	1.10041e-15
FABP5	2.78933	3.32137e-31	9.15004e-30
COL1A2	2.85464	2.45624e-22	2.33078e-21
FNDC1	2.56425	1.07652e-07	2.56602e-07
C7orf57	4.65732	1.24877e-29	2.74144e-28
HNF4G	1.02131	9.6471e-13	3.7122e-12
TNFRSF11B	2.87776	1.39063e-33	5.45574e-32
SBSPON	1.68946	7.29063e-07	1.6024e-06
EN2	2.33515	3.71778e-19	2.59955e-18
KCNV1	-2.39272	2.82709e-10	8.64902e-10
CSMD3	-2.35258	1.39999e-47	2.24799e-44
MICALL2	1.50984	1.37991e-32	4.55514e-31
CA3	4.37997	4.30179e-38	3.80726e-36
OSR2	2.28566	3.66308e-27	5.94127e-26
FZD6	1.58561	2.36349e-20	1.84804e-19
CTHRC1	1.92047	4.20325e-20	3.21391e-19
TMEM67	1.12	3.09047e-24	3.55546e-23
DIRAS2	-1.24418	1.46285e-11	5.02749e-11
ZMAT4	-1.37359	5.89814e-10	1.74875e-09
TMEM71	2.50067	1.00103e-35	5.69701e-34
C8orf34	1.62751	9.67154e-13	3.72097e-12
RASEF	2.8688	3.88767e-20	2.98072e-19
C9orf64	1.61358	5.55041e-25	6.97057e-24
TRPV6	-1.10369	3.66951e-05	6.72964e-05
FBP1	1.85422	1.59038e-32	5.21163e-31
PGAP4	-1.30591	2.35513e-34	1.05887e-32
CYBB	1.11493	6.48743e-18	4.02532e-17
NCF1C	1.54408	6.80558e-34	2.78163e-32
CLDN3	1.25601	0.000852178	0.00134294
SLITRK5	-1.08648	2.64448e-34	1.17486e-32
MELK	1.22529	6.15974e-09	1.66192e-08
SLC7A3	1.90987	0.00152237	0.00232492
GPR101	-1.59882	9.83139e-13	3.77988e-12
LRFN5	-1.2307	6.02938e-17	3.42101e-16
LRRC18	3.00219	1.43624e-06	3.06065e-06
PHYHIPL	-1.2832	1.6162e-40	2.47158e-38
GJB2	2.0572	0.000108462	0.000189275
DEPP1	1.61904	2.2172e-26	3.26622e-25
TMEM63C	-1.1331	2.13777e-27	3.57834e-26
NGB	-2.29208	8.57775e-08	2.06808e-07
SOHLH1	-1.66097	1.47239e-11	5.05875e-11
STOX1	-1.08609	1.59216e-14	7.22189e-14
PPP1R36	1.71551	6.41056e-19	4.38859e-18
C10orf82	-1.25444	1.9031e-06	4.00615e-06
HSPA12A	-1.02994	1.83213e-19	1.31502e-18
E2F7	2.07341	8.73725e-13	3.37538e-12
OTOGL	-1.11152	5.3166e-24	5.97616e-23
AGBL2	1.7051	7.50149e-16	3.83974e-15
TC2N	1.81561	7.14153e-24	7.90875e-23
NELL1	-1.34775	4.47079e-09	1.22193e-08
PTER	-1.31052	0.00535152	0.00759867
C1QL3	-2.11041	4.27524e-08	1.06055e-07
KCNC2	-2.29112	1.87206e-17	1.11785e-16
ADAMTS15	1.12585	0.00079866	0.00126338
SVOP	-2.38153	2.4849e-28	4.57499e-27
IKBIP	1.05555	1.83423e-25	2.42979e-24
SPINT1	1.38246	1.08353e-28	2.08363e-27
LRTM2	-2.04368	9.02503e-25	1.10262e-23
GABRB3	-2.02084	3.7942e-42	8.61121e-40
SCN3B	-1.80169	1.71868e-26	2.56887e-25
C2	1.86442	4.3656e-31	1.18956e-29
PLEKHF1	1.0246	9.23983e-13	3.56341e-12
TMEM100	-1.80759	5.89472e-33	2.04181e-31
NETO1	-1.19366	1.28536e-23	1.38452e-22
SERPINB8	1.21504	6.67511e-26	9.36693e-25
TUB	-1.28246	2.07697e-43	6.48476e-41
TMEM130	-1.73898	1.85854e-12	6.96682e-12
MFAP4	1.72297	9.68744e-24	1.0551e-22
WEE1	1.52299	3.44363e-25	4.43626e-24
PRKCB	-1.36421	1.41986e-14	6.47302e-14
RRAD	1.23655	8.28304e-11	2.6734e-10
MC4R	-1.27189	4.4387e-16	2.3166e-15
B2M	1.07957	5.22277e-31	1.40272e-29
NNMT	4.22017	1.31104e-42	3.31148e-40
STRCP1	-1.81371	1.11964e-33	4.43124e-32
YPEL4	-1.06984	2.69045e-23	2.8157e-22
FAM111A	1.08281	5.7119e-31	1.51957e-29
PCLAF	1.33886	1.49669e-08	3.87532e-08
CACNG2	-2.83404	1.979e-38	1.86148e-36
TAC3	-1.04516	0.00046249	0.00075182
ELFN2	-1.83843	6.40961e-42	1.34662e-39
MS4A7	1.01873	2.90647e-14	1.28718e-13
MS4A14	1.00588	2.29611e-15	1.12235e-14
EVA1C	1.66045	4.00103e-38	3.55507e-36
SGSM1	-1.64471	9.43077e-40	1.1778e-37
GNGT2	1.23123	3.70875e-30	8.70278e-29
PRRX2	2.70749	8.64384e-12	3.04519e-11
ISLR2	-1.39845	1.35386e-07	3.19357e-07
C16orf92	-1.60643	1.48403e-26	2.23899e-25
SNX20	1.7493	6.54832e-30	1.48244e-28
RBFOX3	-1.75744	4.92875e-17	2.82073e-16
CD3D	2.76753	1.55999e-31	4.50753e-30
ACAA2	1.10685	1.70431e-25	2.2657e-24
KLHL26	1.07971	2.27882e-14	1.01744e-13
CORO6	-1.1807	8.96128e-15	4.15789e-14
TUBA1C	1.57729	8.7062e-35	4.24545e-33
SERTAD3	1.04958	6.0146e-40	7.90691e-38
CYP2S1	1.17996	8.60159e-29	1.67131e-27
LAIR1	1.44391	2.44184e-30	5.89609e-29
CDC42EP5	1.39839	5.74186e-18	3.58448e-17
LAIR2	1.98362	5.28363e-10	1.57236e-09
DNAAF3	2.39044	9.39325e-23	9.32275e-22
ATCAY	-1.77792	5.75584e-37	4.05616e-35
SEMA6B	-1.21263	1.86739e-34	8.56713e-33
SERPINF2	1.08116	2.98563e-22	2.81059e-21
KLK5	-1.9571	1.34539e-08	3.50133e-08
RCOR2	-1.51294	4.92029e-34	2.0752e-32
ANGPTL4	1.20827	8.11471e-05	0.000143467
IGFBP6	1.17083	2.35914e-05	4.42646e-05
CD300C	1.29459	6.1454e-28	1.09122e-26
CD300A	1.19331	4.78124e-25	6.06217e-24
TEKT1	3.18243	1.64562e-11	5.62298e-11
MGAT5B	-1.06787	3.66079e-17	2.12045e-16
TK1	1.25941	1.60272e-12	6.05228e-12
GSDMA	1.42742	3.31769e-08	8.31272e-08
CASKIN1	-1.42772	2.48319e-37	1.87323e-35
PLAAT5	1.26227	3.14825e-07	7.16686e-07
ULK4	1.04891	3.08309e-30	7.32641e-29
BATF2	1.51843	5.55351e-22	5.09355e-21
PNOC	-1.29363	0.00312618	0.00458246
KCNJ4	-1.28071	1.63462e-09	4.6591e-09
VASN	2.81997	2.09403e-37	1.63451e-35
GNG4	-1.08994	6.71903e-32	2.03016e-30
INSM2	-2.75944	1.06836e-33	4.23576e-32
FILIP1L	1.47494	5.14481e-19	3.54989e-18
TAP1	1.06285	5.27684e-17	3.01304e-16
BDKRB2	2.38683	1.24369e-20	9.97795e-20
MLKL	1.02129	1.32646e-26	2.01207e-25
CMAHP	1.07184	3.47772e-21	2.94128e-20
RHOH	1.54717	2.83343e-30	6.76892e-29
SCNN1B	1.96776	2.84656e-10	8.69957e-10
REEP4	1.04354	4.77048e-42	1.03116e-39
PHYHIP	-1.48226	2.86676e-09	7.9798e-09
SERINC2	1.41759	4.00226e-16	2.09673e-15
CHRM1	-1.84171	4.92454e-23	5.02969e-22
COL3A1	3.47962	4.8274e-17	2.76625e-16
DYNLRB2	1.48837	0.000124202	0.000215403
VWA3B	1.60507	2.72112e-10	8.33176e-10
LRATD2	-1.1531	1.61533e-22	1.55848e-21
SLC16A4	1.46025	1.32245e-28	2.50452e-27
IL7R	2.03168	5.27084e-18	3.30512e-17
NPNT	2.50502	5.37247e-23	5.45991e-22
CA7	-1.38909	1.15831e-05	2.24763e-05
CXXC4	-1.10837	2.41659e-34	1.08217e-32
TCTN2	1.00634	3.95388e-26	5.68306e-25
SHOX2	4.22398	3.69764e-26	5.32498e-25
HTR1E	-2.17675	4.07081e-10	1.22506e-09
FSTL5	-1.53081	9.02509e-24	9.8727e-23
ATOH8	-1.26787	1.18091e-23	1.2769e-22
VAMP5	1.36474	2.33024e-42	5.45665e-40
INPP5D	1.11718	1.34694e-29	2.93688e-28
PPIC	1.68068	1.21925e-25	1.65611e-24
STXBP6	-1.2353	3.30779e-23	3.43302e-22
GRM5	-1.69871	4.79793e-16	2.49612e-15
LGALS9	1.23992	7.22494e-28	1.26987e-26
CPLX1	-1.52423	1.89916e-27	3.19559e-26
SIGLEC7	1.49479	1.61385e-24	1.91549e-23
SLC49A3	1.30212	7.50837e-28	1.31766e-26
KLK7	-2.18707	4.94501e-10	1.47687e-09
ROR2	2.71347	7.22197e-19	4.91126e-18
FAM110B	-1.4427	3.95836e-39	4.29874e-37
MN1	-1.03573	6.80789e-27	1.06575e-25
CXCL10	3.7604	1.03402e-32	3.45914e-31
CXCL11	2.82748	3.34697e-20	2.5829e-19
GPRIN1	-1.17821	4.70932e-26	6.72162e-25
HSPB3	-1.22127	1.77944e-06	3.75709e-06
IL1RAPL1	-1.28907	1.11583e-30	2.81209e-29
RNASE2	1.87829	2.91353e-28	5.32922e-27
RNASE3	1.41163	1.58305e-15	7.8689e-15
PTAFR	1.0218	1.38515e-17	8.37274e-17
RNASE6	1.1951	1.42786e-24	1.70735e-23
CXCL8	1.99518	0.000316078	0.000524389
COL22A1	1.46742	7.625e-12	2.70235e-11
CD52	1.93119	1.14168e-19	8.36807e-19
GPR183	1.10944	4.28645e-17	2.47012e-16
CCDC8	2.67418	6.05832e-20	4.56251e-19
CLIC3	1.13877	2.53301e-15	1.23171e-14
CKAP2L	1.01	2.8832e-05	5.35214e-05
DRD5	-1.49885	3.31062e-08	8.29962e-08
MT1E	1.51706	4.36885e-11	1.43985e-10
LINGO1	-1.30737	3.73236e-32	1.1621e-30
PCDH7	-1.1446	2.77732e-30	6.649e-29
P2RY1	1.01688	6.31643e-05	0.000112998
TRIM56	1.05408	5.11854e-39	5.42759e-37
WNT10B	-1.63108	1.28849e-07	3.04673e-07
CALML6	1.18942	1.54777e-07	3.63002e-07
REPS2	-1.39628	2.33172e-36	1.45603e-34
PYDC1	-1.62043	1.22743e-09	3.54244e-09
TM4SF1	1.21819	5.61574e-17	3.19438e-16
FRMPD4	-1.77122	1.41402e-09	4.055e-09
TMEM154	1.86617	6.32022e-35	3.12949e-33
NSG2	-2.09511	3.60493e-38	3.24155e-36
VGLL2	3.55445	4.14743e-10	1.24711e-09
SLC16A5	1.17875	5.75485e-26	8.13642e-25
SLN	2.76452	1.08703e-07	2.58865e-07
TCAF2	1.80575	3.88593e-27	6.28043e-26
SEMA3E	1.4749	1.11573e-06	2.40891e-06
ZNF804A	-1.46551	5.69981e-33	1.98041e-31
KRT8	2.62439	5.80699e-20	4.38499e-19
METTL7B	3.34137	2.03981e-44	9.17099e-42
KRT75	4.67077	1.88496e-15	9.3007e-15
CD14	1.36972	2.54767e-20	1.98721e-19
MZB1	1.34089	1.37826e-15	6.89745e-15
SMAGP	1.08913	3.08723e-20	2.38984e-19
EMB	1.16348	1.71949e-12	6.47257e-12
SIX2	2.11071	9.85506e-08	2.35984e-07
DLGAP1	-1.55955	1.04057e-38	1.02148e-36
HOXB9	5.0128	7.74716e-15	3.61395e-14
SDR16C5	-1.87765	8.07555e-09	2.15169e-08
HTRA3	2.10016	6.10795e-24	6.82467e-23
GPR27	-1.32411	1.08487e-23	1.17702e-22
CYTL1	1.40504	1.0173e-22	1.00391e-21
TRH	1.98004	0.0102083	0.0139631
OSCAR	1.42119	5.28433e-33	1.85612e-31
CAVIN3	1.43308	2.26206e-11	7.63301e-11
PDGFD	1.68815	2.35405e-14	1.04998e-13
FPR2	1.84228	6.33097e-13	2.47815e-12
FPR1	1.49332	1.85452e-21	1.6165e-20
KCNMB3	1.00924	4.58908e-17	2.63506e-16
FUT3	-1.02888	4.90704e-07	1.0962e-06
PRKCE	-1.38147	1.92286e-37	1.52204e-35
GRIK1	1.95318	7.66265e-09	2.04799e-08
JUNB	1.14446	2.52193e-18	1.62817e-17
TMEM37	1.33203	2.17104e-21	1.87281e-20
LRG1	1.15585	2.24503e-15	1.0991e-14
SHCBP1	1.2533	1.95259e-17	1.16251e-16
NPTX1	-1.26613	1.23555e-08	3.22743e-08
KCNK3	-2.19955	8.31482e-34	3.34378e-32
APLN	1.23992	1.90622e-16	1.02935e-15
KSR2	-2.05567	7.01189e-34	2.85557e-32
CDK5R2	-1.55546	4.79788e-22	4.41672e-21
HOPX	1.30871	6.22002e-10	1.84078e-09
RXFP1	-2.24909	1.29745e-14	5.9282e-14
PTGER4	1.66155	2.10863e-25	2.77224e-24
NEUROD2	-1.40201	7.38881e-10	2.17437e-09
OTP	3.92293	1.05513e-22	1.03895e-21
DSCAM	-1.29766	5.02939e-30	1.15486e-28
PTCRA	2.40995	1.4971e-31	4.3538e-30
ENC1	-1.06157	0.0143261	0.0192223
P2RY6	1.68702	2.92196e-27	4.79107e-26
GPR82	2.42123	1.94778e-29	4.16219e-28
SYCE1	-1.99843	1.81699e-13	7.4884e-13
CFAP46	1.0382	1.73779e-06	3.6723e-06
COL8A2	1.87022	1.12947e-30	2.84011e-29
RRM2	1.31899	1.1973e-06	2.57391e-06
PRND	4.3514	1.58142e-11	5.41099e-11
ADRA1D	1.33957	1.36081e-12	5.17089e-12
CYP4F11	1.22	8.57833e-16	4.36687e-15
ZNF217	1.27551	8.42164e-34	3.37466e-32
GAP43	1.1068	1.30042e-12	4.94726e-12
LAMB2	1.07469	3.04585e-42	7.02022e-40
SLFN12	1.42857	1.38188e-25	1.86351e-24
ISG20	1.87254	1.32477e-35	7.40819e-34
MBOAT1	1.31908	9.62481e-23	9.53153e-22
GPR22	-2.06063	2.80841e-10	8.59308e-10
CXCR6	2.49433	1.53567e-27	2.61134e-26
CEBPB	1.03584	5.63481e-27	8.92045e-26
AZU1	-1.11628	3.94978e-14	1.72619e-13
CLEC7A	1.37314	5.41091e-28	9.66141e-27
NEGR1	-1.40923	2.72527e-25	3.54538e-24
CLEC12A	2.47824	8.4137e-27	1.30531e-25
CSDC2	-1.14848	3.41149e-22	3.18746e-21
IL16	1.04807	3.45838e-22	3.22595e-21
ABCG4	-1.2663	1.03585e-06	2.24378e-06
CFAP53	1.0573	2.84337e-07	6.5064e-07
GNG12	1.56378	1.78335e-35	9.8019e-34
INSL5	1.93644	9.70386e-16	4.91534e-15
RSPH9	1.10371	1.45167e-08	3.76484e-08
FUT9	-1.26787	1.36034e-37	1.09607e-35
CTSW	1.81489	4.96064e-26	7.06687e-25
KLHL6	1.18553	1.40459e-20	1.12169e-19
EFEMP2	1.96976	1.29609e-32	4.28472e-31
TMEM217	1.1991	1.39019e-29	3.02825e-28
EFCAB12	2.42482	1.27653e-17	7.73905e-17
FADS6	-2.30424	1.7674e-09	5.0172e-09
SNX32	-1.03024	2.04195e-26	3.01993e-25
SSH3	1.13032	8.00826e-27	1.24499e-25
MRGPRF	1.58214	4.03267e-13	1.60706e-12
MYD88	1.06821	7.18276e-29	1.41021e-27
MIR4435-2HG	1.91922	1.65471e-25	2.20656e-24
HPSE2	-1.22194	3.31921e-21	2.81145e-20
ARPP21	-1.63326	3.72957e-45	2.54063e-42
CCDC96	1.10579	3.65609e-24	4.18054e-23
EVC2	2.73472	6.09501e-31	1.61766e-29
BNC2	1.16511	1.7704e-14	7.98849e-14
RHOD	2.5199	2.68032e-14	1.19078e-13
ADAMTS20	-2.7447	6.36096e-29	1.25875e-27
PARP14	1.23829	3.38993e-31	9.31609e-30
PARP15	1.82273	1.41993e-27	2.42369e-26
GLRX	1.00098	4.93332e-31	1.32816e-29
SNCG	-1.32609	1.1844e-12	4.5212e-12
PPP1R3B	1.09303	5.10386e-29	1.02533e-27
C1QB	1.57051	1.90985e-29	4.08891e-28
C1QA	1.54885	9.70659e-27	1.49557e-25
OLR1	1.25829	3.05744e-20	2.36922e-19
SAA1	6.92738	5.75056e-28	1.02273e-26
TMEM196	-2.05918	1.43753e-19	1.04178e-18
AGR3	5.58374	6.54338e-25	8.11336e-24
TNFRSF10C	1.38848	7.80724e-25	9.60628e-24
FAM166C	2.76003	1.38507e-09	3.97756e-09
NABP1	1.11004	7.96261e-11	2.57262e-10
HSPB7	1.68184	1.56631e-14	7.10909e-14
TAS1R1	1.42586	8.68621e-21	7.07486e-20
SUSD5	-1.23805	6.45147e-19	4.41489e-18
WFIKKN2	3.5215	1.18206e-06	2.54358e-06
CD7	1.71927	2.16988e-33	8.14341e-32
MARCHF10	1.34914	2.63184e-06	5.46599e-06
PLK3	1.20631	2.60259e-40	3.70292e-38
DPY19L1	1.36803	3.1154e-35	1.63251e-33
SPTBN2	-1.42095	2.0039e-40	2.9907e-38
HOXB2	3.43178	8.97161e-26	1.23655e-24
C1QTNF1	1.28038	6.90777e-08	1.68351e-07
PIFO	2.22769	3.82639e-32	1.18973e-30
[truncated: 1,900 more rows]
