# Supplementary material for: Glutathione metabolism-related gene signature predicts prognosis and treatment response in low-grade glioma
Source: Aging (Albany NY). 2024 May 30;16(11):9518–46. doi: 10.18632/aging.205881 (PMC11210255; doi:10.18632/aging.205881)
Supplement: Supplementary Table 3 [file aging-16-205881-s004.xlsx]

## Sheet: algorithm_features
Supplementary Table 3. Genes selected by three machine learning algorithms.
features	algorithm
DPEP1	Lasso	plsRcox	SuperPC
G6PD	Lasso	plsRcox	SuperPC
GCLC	Lasso	plsRcox	SuperPC
GCLM	Lasso	plsRcox	SuperPC
GGT1	Lasso	plsRcox	SuperPC
GGT5	Lasso	plsRcox	SuperPC
GSR	Lasso	plsRcox	SuperPC
GSS	Lasso	plsRcox	SuperPC
GSTA4	Lasso	plsRcox	SuperPC
IDH1	Lasso	plsRcox	SuperPC
NFE2L2	Lasso	plsRcox	SuperPC
OPLAH	Lasso	plsRcox	SuperPC
CHAC1		plsRcox	SuperPC
CTNS		plsRcox	SuperPC
ETHE1		plsRcox	SuperPC
GLRX2		plsRcox	SuperPC
GPX1		plsRcox	SuperPC
GSTK1		plsRcox	SuperPC
GSTM4		plsRcox	SuperPC
GSTM5		plsRcox	SuperPC
GSTO2		plsRcox	SuperPC
HAGH		plsRcox	SuperPC
MGST2		plsRcox	SuperPC
MMACHC		plsRcox	SuperPC
SLC1A1		plsRcox	SuperPC
SLC1A2		plsRcox	SuperPC
SOD1		plsRcox	SuperPC
SOD2		plsRcox	SuperPC
