# Supplementary material for: Glutathione metabolism-related gene signature predicts prognosis and treatment response in low-grade glioma
Source: Aging (Albany NY). 2024 May 30;16(11):9518–46. doi: 10.18632/aging.205881 (PMC11210255; doi:10.18632/aging.205881)
Supplement: Supplementary Table 4 [file aging-16-205881-s005.xlsx]

## Sheet: GSEA
Supplementary Table 4. Gene set enrichment analysis (GSEA) reveals risk-associated pathways in high and low-risk groups.
ID	Description	setSize	enrichmentScore	NES	pvalue	p.adjust	qvalue	rank	leading_edge	core_enrichment
CAHOY_NEURONAL	CAHOY_NEURONAL	86	-0.675422	-3.00399	1e-10	2.08889e-09	4.91228e-10	2616	tags=70%, list=12%, signal=62%	ENO2/NSF/RTN4RL1/CRH/NXPH2/PRDM8/GREM2/PPFIA2/DYNC1I1/ICAM5/CLSTN2/CBLN4/DMTN/ITPKA/SYT5/FGF9/GAD2/STXBP1/NELL1/NWD2/GLRA2/GDA/CPNE5/NAPB/CALN1/PHF24/SLC6A17/GABRA5/JPH4/CKMT1A/CCK/SYT13/CELF4/NEFL/SLC17A6/STX1A/HPCA/SH2D5/TBR1/CAMKV/SYT1/NRGN/TRHDE/MAL2/HCN1/MYT1L/GPR22/GABRD/NEFM/GABRG2/SV2B/SYT4/CACNG3/KRT222/CDH9/RGS4/AMER3/RASL10A/SLC6A7/NEUROD6
CAHOY_ASTROGLIAL	CAHOY_ASTROGLIAL	90	0.75426	2.18909	1e-10	2.08889e-09	4.91228e-10	2930	tags=61%, list=13%, signal=53%	HOATZ/FMOD/EMP3/COL8A1/TIMP1/ANXA1/TNFRSF12A/COL5A1/SERPINE1/SERPING1/RHOD/CP/ITGBL1/GPNMB/AEBP1/FOXJ1/LPIN3/AKR1B10/MSN/LGALS3/NUAK2/FBLN5/LOX/ECRG4/C3/MYOF/NOX4/CD109/BST2/LOXL2/PRSS23/CASP1/LCN2/PSRC1/HMOX1/IGFBP3/TMEM37/LTBP2/FAS/OGN/ACTA2/CNN1/LRP2/C1QTNF1/SLC66A3/SUCNR1/TOR4A/TSPO/TAGLN/SPATA6/TRAF1/SEMA3B/MXRA8/DYSF/CALHM5
RPS14_DN.V1_UP	RPS14_DN.V1_UP	165	0.700019	2.10182	1e-10	2.08889e-09	4.91228e-10	3005	tags=58%, list=14%, signal=51%	GDF15/CLEC5A/PLAU/F13A1/PTPN22/CSTA/HLA-DRB6/GPNMB/SPP1/ADAMDEC1/SLAMF8/HLA-DQB1/MX2/SH2D2A/MX1/CAPG/BCL2A1/PDGFA/CD69/PTGER4/COLEC12/NKG7/MS4A6A/HLA-DMB/HLA-DMA/DNAJC22/ITGAL/RBM47/KYNU/IL1RAP/CCL2/LY96/CASP1/TGFBI/TNFRSF10C/CXCL8/SDC4/ADA2/CD14/ARL4C/CDCP1/CLEC7A/SASH3/SPINT1/ITGB2/CTSS/CYP1B1/EMP1/CLEC2B/VNN1/MYO1F/PROM1/RMST/PADI2/BIRC3/ACTA2/TFEC/TYROBP/EVI2B/TRIM22/CPM/CD300A/ARHGAP25/JAG1/…
EGFR_UP.V1_UP	EGFR_UP.V1_UP	170	0.676063	2.03727	1e-10	2.08889e-09	4.91228e-10	3878	tags=51%, list=17%, signal=43%	IDO1/ABCC3/IGF2BP2/LIF/CYP27B1/TNFRSF11B/VAV3/GBP1/TGFB2/SEL1L3/TNFAIP8/AOX1/COL5A2/GBP2/RGS16/SOCS2/ISG20/ENPP1/IL1R1/S100A9/S100A8/ACTG2/ITGA3/CCL22/LOXL2/CCL2/P2RY6/IRF1/SQOR/ICAM1/TCIM/BACE2/CYP1B1/ITGA2/ADM/LPAR6/MPZL2/DUSP5/ANGPTL4/GCNT1/GAL/ATF3/CLDN1/PSMB9/RAB27A/LHFPL2/CMAHP/DUSP6/BCL3/APOBEC3B/ELK3/MEIS3P1/CEBPD/FNDC3B/TAP1/RCAN1/PLAGL1/IL15RA/COTL1/FGFR3/FHOD1/CASP7/A2M/SLCO2A1/GLRX/HS…
SNF5_DN.V1_UP	SNF5_DN.V1_UP	155	0.653121	1.95859	1e-10	2.08889e-09	4.91228e-10	3947	tags=47%, list=18%, signal=39%	DLK1/FMOD/AQP5/CXCL10/MEDAG/PRRX2/GBP1/C1R/COL15A1/FNDC1/C1S/OASL/CD48/ISG20/CD52/MMP14/CD93/CD109/CAVIN3/PTPRC/LILRB1/FBLN1/C1QC/ITGB2/FABP7/IER5L/LMO2/PLEK/KIF20A/HJURP/SPI1/LGALS3BP/CD53/IFI44L/PSMB9/FYB1/VAMP5/HLA-A/LCP1/MEST/FCGR1A/SLC1A5/AIF1/LY86/APOD/C3AR1/TMEM106A/BUB1/PSMB8/PLD4/SP110/CXCR4/ANPEP/PLCE1/WAS/ELN/NDE1/CX3CR1/HAPLN2/LAMB2/UBE2C/AURKB/MT3/DTL/EGR2/CSF1R/TGFB3/TAP2/MCM5/EGFL6…
HOXA9_DN.V1_UP	HOXA9_DN.V1_UP	170	0.63743	1.92086	1e-10	2.08889e-09	4.91228e-10	3472	tags=41%, list=16%, signal=35%	CHI3L1/GDF15/COL6A3/CCR2/TGM5/MCUB/TYMP/HLA-DRA/ISG15/PTGER4/S100A9/THBS4/MS4A6A/S100A8/HLA-DMA/RBM47/MYOF/LY96/CXCL8/ADA2/ARL4C/CYTIP/FZD2/FCER1G/CYP1B1/FGL2/GADD45A/LPAR6/THBD/PARP12/GLIPR1/FAS/SERPINB8/ACTA2/TFEC/TYROBP/MS4A4A/TRIM22/THEMIS2/BST1/IL10RA/NCF2/CD86/SLC22A18/FNDC3B/GPR183/CARD9/MNDA/IL13RA1/H2BC12/CD84/SNX10/FUCA1/SLC26A2/SCPEP1/CXCR2/CD209/IFI16/PECAM1/TRPM4/HPSE/TIGAR/GALNT7/GN…
STK33_NOMO_UP	STK33_NOMO_UP	246	0.620633	1.88611	1e-10	2.08889e-09	4.91228e-10	4501	tags=44%, list=20%, signal=36%	CXCL6/GDF15/DDIT4L/COL6A3/PLAU/TNFAIP6/TREM1/TPSAB1/STC1/PTX3/GPNMB/ADAMDEC1/IL7R/ADGRE2/IL10/FABP4/PINLYP/IL1R1/KDELR3/NAMPT/FAM114A1/SAMD9L/KYNU/CCL20/LY96/GBP3/HMOX1/SDC4/SIGLEC9/ICAM1/CXCL1/ACP5/ARL4C/UPP1/CLEC7A/C5AR1/TGIF1/C1QC/TLR1/EMP1/CLEC2B/AQP9/LRRC25/PTGFRN/THBD/OLR1/IL1R2/GLIPR1/NEAT1/DUSP5/IL1A/HACD4/CD300C/TFEC/HAVCR2/KCNJ2/IL10RA/BCL3/HSD11B1/MEIS3P1/ZFP36/RASGRP3/LACC1/ZIC2/TDO2/…
STK33_SKM_UP	STK33_SKM_UP	242	0.601907	1.82911	1e-10	2.08889e-09	4.91228e-10	5182	tags=53%, list=23%, signal=41%	EMP3/TNFRSF11B/ANXA1/PLAU/MYBPH/TMEM71/NAPSB/GPR65/GBP2/OR52K3P/FABP4/PKIB/IL15/BCL2A1/CD101/TFPI2/CD58/NAMPT/LY96/GBP3/HMOX1/IRF1/LGALS1/FAM20C/UPP1/C5AR1/TLR10/TLR1/FGL2/ADM/LPAR6/THBD/OLR1/GLIPR1/RAB7B/NFKBIZ/DUSP5/IL1A/ACTA2/TFEC/TYROBP/CYTH4/H3C10/CD53/KCNJ2/CLDN1/MILR1/FCHSD1/IL10RA/CYBB/BCL3/NCF2/CD86/GPR132/ZFP36/TNFAIP2/RASGRP3/GPR183/VSIG4/TLR6/CTSK/ADAM28/NINJ2/NLRC4/SUCNR1/PPCS/H2BC11…
STK33_UP	STK33_UP	243	0.596584	1.81309	1e-10	2.08889e-09	4.91228e-10	4595	tags=46%, list=21%, signal=37%	GDF15/ANXA1/COL6A3/PLAU/TREM1/STC1/TMEM71/TRAC/GPR65/ADAMDEC1/FABP4/PKIB/BCL2A1/CD101/TFPI2/NAMPT/SAMD9L/KYNU/LY96/GBP3/HMOX1/ICAM1/CXCL1/FAM20C/UPP1/C5AR1/TLR10/TGIF1/TLR1/EMP1/FGL2/CLEC2B/AQP9/LRRC25/ADM/LPAR6/THBD/OLR1/GLIPR1/DUSP5/IL1A/TFEC/TYROBP/HAVCR2/KCNJ2/CLDN1/MILR1/IL10RA/BCL3/NCF2/MEIS3P1/ZFP36/RASGRP3/TDO2/VSIG4/TLR6/ADAM28/NLRC4/PPCS/NRP1/H2BC4/PPBP/CD36/TMEM255A/JUNB/HBEGF/GPRIN3/I…
BMI1_DN.V1_UP	BMI1_DN.V1_UP	120	0.683876	2.02706	1.26699e-10	2.38194e-09	5.60142e-10	2992	tags=45%, list=13%, signal=39%	LIF/ADAM12/GPRC5A/DKK1/TNFAIP6/PLAT/SRPX2/IGKC/TGFB2/BDKRB2/MMP7/MMP3/CPA4/IL7R/PDCD1LG2/GDF5/F3/COL13A1/ADGRE5/CCL20/ITGA5/ITGA3/CXCL1/EPHA2/GREM1/TCIM/CDCP1/CTSS/VNN1/GABRE/MICB/ACTA2/FAP/GAL/CLDN1/JAG1/ITGA4/FES/LCP1/LHFPL2/BST1/SLC1A5/CLSPN/TAP1/C3AR1/FZD5/SLCO2A1/ANPEP/TAGLN/HBEGF/TMEM51/COL16A1/MICA/PTHLH
MEL18_DN.V1_UP	MEL18_DN.V1_UP	120	0.682382	2.02264	1.58622e-10	2.48508e-09	5.84398e-10	3189	tags=50%, list=14%, signal=43%	LIF/CCN4/ADAM12/TNFAIP6/PLAT/SRPX2/HLA-DQA1/STEAP3/TGFB2/BDKRB2/MMP7/SPP1/CPA4/IL7R/PDCD1LG2/GDF5/PLAUR/FOSL1/F3/COL13A1/ADGRE5/HS3ST3A1/ITGA5/ITGA3/VEGFA/FZD6/CXCL1/EPHA2/GREM1/ADAM19/ARL4C/CDCP1/GPR3/CTSS/VNN1/ADM/MICB/TFEC/FAP/GAL/CLDN1/JAG1/ITGA4/LCP1/LHFPL2/SLC1A5/CLSPN/TAP1/CHST2/C3AR1/NRP1/SLCO2A1/HBEGF/TMEM51/COL16A1/MICA/PTHLH/ECM1/ZC3H12A/VEGFC
KRAS.600_UP.V1_DN	KRAS.600_UP.V1_DN	171	0.638554	1.9232	1.47001e-10	2.48508e-09	5.84398e-10	3177	tags=46%, list=14%, signal=39%	HOXB8/HOXC8/COL2A1/IGF2-AS/IGLV2-14/PODNL1/WNT16/TRH/VAV3/SIT1/GBP1/TGFB2/SERPING1/FCGBP/PSORS1C1/CD248/CIITA/HLA-DOA/KRT16/AKR1B10/MLANA/NKX6-1/MX2/MX1/ZBP1/OAS1/CTSW/PLBD1/ENPP1/XAF1/ACTG2/BST2/VGLL3/S100A7/RAMP3/SCN7A/THNSL2/CXCL14/OLFML2A/ATP2A3/THBD/PROC/TREM2/HTR1D/CD300A/IFI44L/ADRA2B/LGALS9/PNMT/MYL9/BLNK/RRAD/TNFSF10/CRYGD/RTP4/PDE6B/IMPA2/PTPRH/DENND1C/P2RX1/FGFR3/CRABP2/MATN2/MAML3/HAA…
ESC_V6.5_UP_EARLY.V1_DN	ESC_V6.5_UP_EARLY.V1_DN	130	0.658029	1.96026	8.156e-10	1.17948e-08	2.7737e-09	3669	tags=48%, list=17%, signal=41%	IGF2/COL3A1/COL1A1/ANXA1/TNFRSF12A/PLAU/COL1A2/SERPINE1/COL4A1/LOXL1/COL4A2/S100A4/MGP/SOCS3/AEBP1/ANXA2/GBP2/CAVIN1/TUBB6/SFN/PCOLCE/SERPINF1/TNC/LOX/CD44/BGN/S100A6/CAV1/SP5/IGFBP3/TM4SF1/EMP1/C16orf89/KIF18A/FAP/ANXA5/CMTM7/IGFBP7/CD37/BCL3/GAP43/B2M/FBLN2/PMP22/CSRP1/FZD5/CALD1/TGFB1I1/GSN/F2RL1/TAGLN/JUNB/HBEGF/COL16A1/SERPINF2/CCN1/GASK1B/ABCA7/AQP3/BHLHE40/TSHZ2/RASSF8/DSP
LEF1_UP.V1_UP	LEF1_UP.V1_UP	167	0.630037	1.89764	9.22104e-10	1.23825e-08	2.91191e-09	4141	tags=49%, list=19%, signal=40%	HOXB2/EMP3/PDLIM4/RBP1/ROR2/DKK1/G0S2/FLNC/SERPINE1/LOXL1/S100A3/S100A4/GATA3/FBXO17/LCK/STRA6/MAOB/COL9A3/MFAP2/ADGRE2/SH2D2A/MSN/EN2/PRF1/VIM/PDGFA/CCR7/FOSL1/SLC43A3/APOBEC3G/ZAP70/FN1/RUNX3/CST7/KCNN4/GZMB/CAVIN3/LGALS1/ADAM19/EMP1/LTBP2/LMO2/CD302/SLC17A9/S100A2/IGFBP7/GJB1/MYL9/ELK3/TNFRSF1B/CARD9/CHST2/PHLDA3/DENND1C/CRABP2/CXCR4/IGFBP6/CEACAM21/ARHGAP4/ARC/TRPV2/COL6A1/PCSK5/ANO1/CYBRD1/I…
ATF2_S_UP.V1_DN	ATF2_S_UP.V1_DN	147	0.635858	1.90105	1.00532e-09	1.26e-08	2.96306e-09	3121	tags=40%, list=14%, signal=35%	CHI3L1/ABCC3/PLA2G2A/FMOD/IGFBP2/PTGER2/TNFRSF11B/MYBPH/TNFAIP6/TREM1/KRT8/COL15A1/SERPING1/SFRP4/DES/SERPINA3/CSTA/ITGBL1/C1RL/OSMR/PLEK2/DPP4/IL1R1/EVC/ST6GALNAC2/TMEM176A/IL1RAP/CCL2/RARRES1/ROR1/LAMA2/CYP1B1/GCH1/CD302/PADI2/NEAT1/ANGPTL4/SLC7A7/GALNT12/NDUFA4L2/NFE2/PDLIM3/FBLN2/EFEMP1/STXBP2/A2M/MYO1D/IL4R/IQCG/AK4/VCAM1/PLAAT3/SBNO2/JUP/COL16A1/ATF5/SLC39A8/ADORA3/CLMN
BMI1_DN_MEL18_DN.V1_UP	BMI1_DN_MEL18_DN.V1_UP	120	0.665123	1.97148	1.77449e-09	2.08503e-08	4.9032e-09	3189	tags=48%, list=14%, signal=41%	KRT75/LIF/ADAM12/TNFAIP6/PLAT/TGFB2/MMP7/MAP3K7CL/CPA4/IL7R/PDCD1LG2/GDF5/PLAUR/FOSL1/F3/ADM2/COL13A1/ADGRE5/ITGA5/ITGA3/VEGFA/KCNN4/CXCL8/WEE1/CXCL1/GREM1/ADAM19/ARL4C/TCIM/GADD45A/VNN1/ADM/PIK3CG/BIRC3/IL1A/DUSP10/TFEC/FAP/GAL/ATF3/HTR1D/CLDN1/JAG1/ITGA4/LCP1/LHFPL2/BST1/C3AR1/TAGLN/HBEGF/TMEM51/COL16A1/MICA/PTHLH/PIM1/ZC3H12A/VEGFC
P53_DN.V1_DN	P53_DN.V1_DN	167	0.6205	1.86892	3.98405e-09	4.40589e-08	1.0361e-08	3165	tags=41%, list=14%, signal=36%	PRAME/ABCA4/HOXB2/ITK/IGFBP2/ESM1/FABP5/IL2RB/VGF/CFI/HGD/GPNMB/MMP7/SPP1/SOCS3/MLANA/OAS1/CDH19/VIM/BCL2A1/IL1R1/FBLN5/TFPI2/NAMPT/SOX10/ITGAL/RUNX3/LY96/CASP1/HMOX1/CXCL1/CA2/ACP5/CYP27A1/APOC2/CTSZ/THBD/CD247/CPVL/FAS/ACTA2/SLC16A4/TRIM38/TRIM22/IGFBP7/ITGA4/PMEL/FRMD4B/CTSK/HOXD8/MAL/DOCK2/FAM50B/APOC1/PLIN2/RENBP/PLA2G4A/SLC26A2/HSPA2/S100B/ACADS/IRF4/ELOVL2/IFI16/SRGN/S100A1/ECM1/MITF/STAT6
ESC_J1_UP_LATE.V1_UP	ESC_J1_UP_LATE.V1_UP	131	0.652947	1.94458	4.9307e-09	5.14984e-08	1.21105e-08	4535	tags=53%, list=20%, signal=42%	TTR/H19/GATA4/COL2A1/IGF2/DLK1/TNFRSF12A/COL4A1/TFF3/COL4A2/SEL1L3/HLA-DRB5/DPP4/GPC3/SNAI1/SHROOM3/F3/BGN/GNG12/LOXL2/CTSC/CITED1/APOC2/LXN/MTTP/MYO5B/ENPEP/GLIPR1/VAMP8/FRZB/TFEC/ATF3/IGFBP4/PDIA5/RNF128/P4HA2/FST/MYO7A/SLCO2A1/GSN/UNC5B/CUBN/NAGA/SRGN/SELENON/CLDN7/CCN1/SLC39A8/S100A1/BICC1/SLC40A1/DBNDD2/EFNA1/GADD45B/CD55/LGALS2/DSP/SELENOP/RAB33B/GPRC5C/PODXL/WLS/P2RX4/DAB2/LGMN/FUT8/PLXNB2…
KRAS.DF.V1_UP	KRAS.DF.V1_UP	168	0.61885	1.86359	1.30985e-08	1.29606e-07	3.04784e-08	3878	tags=43%, list=17%, signal=36%	EMP3/PDPN/ALDH1A3/IL13RA2/COL6A3/DKK1/PLAU/PLAT/SERPINE1/DPYD/ISG20/OPLAH/TFPI2/ADGRE5/RAC2/HS3ST3A1/SLC2A10/CCL20/LOXL2/CXCL8/CXCL1/GREM1/SPAG4/TLR2/STEAP1/SERPINB1/HERC5/TM4SF1/E2F8/DLGAP5/HCLS1/GCH1/IFI44/CPVL/MVP/LGALS3BP/GALNT6/IFI44L/PLPP2/SEC24D/BCL3/ELK3/RRAD/IFI35/NAT1/SPRY2/IFITM1/PROCR/MAP3K6/CRYZ/NRP1/GLRX/ANPEP/SLC26A2/HSPA2/CORO1A/IRF4/SRGN/AURKB/CALHM2/VEGFC/TMEM158/PLIN3/TP53I3/IF…
ESC_V6.5_UP_LATE.V1_UP	ESC_V6.5_UP_LATE.V1_UP	145	0.629013	1.88188	1.90493e-08	1.79063e-07	4.21089e-08	3022	tags=30%, list=14%, signal=26%	TTR/POSTN/H19/GATA4/PITX2/COL2A1/IGF2BP2/DKK1/COL4A1/COL4A2/SEL1L3/MFAP2/DPP4/GPC3/KDELR3/APLNR/FGFRL1/LOXL2/CITED1/FZD2/APOC2/MTTP/CYBA/HPN/HLA-H/VAMP8/FRZB/SLC27A3/BVES/LCP1/PDLIM3/RNF128/PLAGL1/P4HA2/UNC5B/GSC/CUBN/SIX5/SRGN/SELENON/FZD8/ARHGEF16/SLC39A8
ATF2_UP.V1_DN	ATF2_UP.V1_DN	158	0.626113	1.87655	2.66151e-08	2.38268e-07	5.60317e-08	3372	tags=39%, list=15%, signal=34%	CHI3L1/SHOX2/ABCC3/PLA2G2A/FMOD/HOXB2/IGFBP2/PDPN/TNFRSF11B/CCN4/TREM1/S100A3/PTX3/SFRP4/TGM5/SERPINA3/ITGBL1/C1RL/PLEK2/DENND2D/TP73-AS1/CFH/IL1R1/EVC/ST6GALNAC2/IL1RAP/CCL2/RARRES1/ROR1/DEPP1/ADA2/MFAP4/CYP1B1/GCH1/CD302/GPR37/NEAT1/GALNT12/KCNJ2/NDUFA4L2/PDLIM3/FBLN2/EFEMP1/STXBP2/RAB11FIP1/PLA2G4A/MYO1D/IQCG/AK4/VCAM1/PLAAT3/JUP/ERAP2/SLC39A8/PIM1/ZC3H12A/CYBRD1/CXCL12/GASK1B/EDNRA/GAS1/BHLHE…
MEK_UP.V1_UP	MEK_UP.V1_UP	167	0.606538	1.82686	2.86653e-08	2.44958e-07	5.76048e-08	4030	tags=41%, list=18%, signal=34%	ABCC3/IGF2BP2/GDF15/TNFRSF11B/ALDH1A3/PLAU/ALDH3A1/LOXL1/TNFAIP8/COL5A2/SIX2/AKR1B10/PTGER4/FOSL1/ST6GALNAC2/S100A6/SLC2A10/VWA1/TGFBI/KCNN4/EPHA2/LAMC1/ARL4C/CAPN5/BACE2/CYP1B1/ADM/MPZL2/ANGPTL4/GCNT1/GALNT12/GAL/ITGB4/ARHGDIB/BCL3/NPC2/RFTN1/EPHA1/APOD/ACSL1/ULBP2/COTL1/FGFR3/CCNJL/CXCR4/TGFB1I1/MYO1D/PPARG/F2RL1/PDLIM7/IL4R/SPAG1/CORO1A/ADGRL2/PACSIN3/VASP/BCAM/CLMN/DBNDD1/AQP3/DBNDD2/EHBP1L1/…
ALK_DN.V1_UP	ALK_DN.V1_UP	104	0.665099	1.96008	4.41478e-08	3.45825e-07	8.13249e-08	3201	tags=48%, list=14%, signal=41%	SAA1/CHI3L1/CA3/GDF15/ADAM12/TREM1/IL6/BDKRB2/CSTA/SPP1/RIBC2/GDF5/SLAMF7/CCR7/VNN2/HLA-DMB/KYNU/CCL20/VEGFA/CA2/TCIM/SCN9A/ANGPT2/OLFML3/AQP9/IL1R2/PIK3CG/ANGPTL4/TFEC/FAP/PYY2/NTRK1/BST1/TDO2/SLC1A5/AIF1/CLSPN/CARD9/ADAM28/ENPP2/GNAT2/NNAT/GRPR/ARHGAP4/MT1H/LYL1/GNA15/PCK2/VEGFC/CCL19
IL15_UP.V1_UP	IL15_UP.V1_UP	147	0.609182	1.8213	4.2996e-08	3.45825e-07	8.13249e-08	4015	tags=41%, list=18%, signal=34%	HOXC8/LIF/HS3ST3B1/CCL21/SH2D4A/TNFRSF12A/SPP1/TNFAIP8/VDR/CPA4/LSP1/PTPN7/RGS16/SOCS2/IL10/SLAMF7/CISH/CD69/SOCS1/FOSL1/HABP2/NOX4/OSM/ADAM19/APOBR/SPINT1/AHR/TNFRSF4/IL1A/KCNJ2/NR2F2/PNMT/DUSP6/LILRB4/RGS3/DLX2/TLR3/SLC1A5/LLGL2/RAB11FIP1/SPRY2/FZD5/JUNB/HK2/S100A1/LYL1/ECM1/PIM1/REST/CXCL12/TMEM158/MAFF/EGR2/GADD45B/ACVRL1/TRIB1/DUSP4/ETV4/EGR1/RPP25/MAFK
IL2_UP.V1_UP	IL2_UP.V1_UP	141	0.623336	1.85981	7.80918e-08	5.8725e-07	1.38099e-07	4009	tags=48%, list=18%, signal=39%	KCNK5/LIF/TNFSF14/F2RL2/SH2D4A/TNFRSF12A/KCNE5/SPP1/TNFAIP8/VDR/PTPN7/RGS16/SOCS2/IL10/CISH/CD69/SOCS1/CD52/FOSL1/AMIGO2/SIGLEC9/OSM/ADAM19/CDCP1/HOXA11/AHR/TM4SF1/SPHK1/TNFRSF4/IL1A/NR2F2/EHD2/FOSL2/PLPP2/DUSP6/LILRB4/RGS3/TNFRSF1B/TLR3/SLC1A5/RAB11FIP1/SPRY2/WDR62/FZD5/IQCG/RHBDF2/MEGF6/JUNB/HK2/STX11/PIM1/REST/CXCL12/TMEM158/MAFF/EGR2/KLF6/GADD45B/GFAP/TPBG/TRIB1/DUSP4/GNRH2/PRKCD/EGR1/KCNG1/R…
PTEN_DN.V2_UP	PTEN_DN.V2_UP	109	0.63994	1.89088	1.2685e-07	9.17221e-07	2.15696e-07	3779	tags=50%, list=17%, signal=41%	SERPINA5/KRT75/ALDH1A3/G0S2/PLAU/CPA4/LSP1/IL7R/AKR1B10/SECTM1/THBS4/CASP4/HSPB7/COL13A1/NID2/LOXL2/LCN2/TNFRSF10C/CXCL8/ARL4C/EMP1/ARHGEF5/LPAR1/ANGPTL4/BIRC3/GVINP1/FYB1/VAMP5/ARHGDIB/CD86/GPR183/SLC66A3/SH3BGR/RHBDF1/NNAT/CEACAM21/IL4R/TNFRSF10D/DENND2A/IL1B/ULK4/BNC2/TIGAR/APOL3/EHF/IL32/JUN/GNA14/TP53I3/MIR22HG/ALDH1A2/CA5B/SAMD4A/CHAC1
KRAS.KIDNEY_UP.V1_UP	KRAS.KIDNEY_UP.V1_UP	115	-0.440915	-1.95884	1.5243e-07	1.06136e-06	2.49592e-07	2618	tags=44%, list=12%, signal=39%	ADCY1/RELN/HEY1/RIT2/GAD1/GABRB1/MAGEH1/CPE/TCEAL2/GPM6A/GHRH/DYNC1I1/SERPINI1/DNM3/GRIK2/FGF9/NOL4/SATB1/GRM5/ERC2/NAP1L2/NUDT11/CPEB3/ETV1/HPCAL4/RTN1/SCG3/SCN2A/SLC6A15/PLCB1/NRXN1/CDK5R1/RAPGEF4/GABRA5/NMNAT2/VIPR2/CHGA/NEFL/GRIA2/SNAP91/CHGB/CRYM/ARPP21/SYT1/DLGAP2/SNAP25/SLC12A5/NSG2/SV2B/GABRA1/TMEM100
LTE2_UP.V1_DN	LTE2_UP.V1_DN	177	0.581612	1.75613	2.2352e-07	1.50078e-06	3.52927e-07	4341	tags=42%, list=20%, signal=34%	MGP/CSTA/OASL/COL9A3/ISG15/OAS2/OAS1/TFPI2/LAMP3/PLSCR1/AMIGO2/IFI6/BST2/PRSS23/CAV1/SP100/MOCOS/OAS3/LGALS1/ELF4/HERC5/TM4SF1/IRF7/CASP8/GADD45A/PARP12/SAMD9/IFI44/MICB/NMI/LGALS3BP/IFIH1/H3C10/GAL/ATF3/IFI44L/JAG1/PSMB9/MDK/PDLIM3/EFEMP1/TAP1/IFI35/PHF11/IFITM1/DLC1/H4C8/TSPO/SVIL/NRP1/SP110/MATN2/HERC6/H2AC11/ELOVL2/DDX60/H2AC6/BHLHE41/IFI27/CNN2/GCA/GEM/TRIM14/UGCG/H2BC8/USP18/BTG3/SAMHD1/PTG…
WNT_UP.V1_DN	WNT_UP.V1_DN	132	0.61012	1.81854	2.47541e-07	1.60475e-06	3.77377e-07	2136	tags=30%, list=10%, signal=27%	HOXB5/ABCC3/ADAM12/G0S2/STC1/MET/PTPN22/MMP3/HLA-DRB5/CD48/SH2D2A/ISG15/OAS1/VIM/CD5/CD79B/HLA-DMB/CD44/CD93/VEGFA/CSF2RB/ADAM19/RAMP3/CMPK2/IRF7/C16orf89/RSPH1/HSD3B7/THBD/CYBA/HLA-H/GBP4/LGALS3BP/IFIH1/NFATC2/HLA-A/SLC22A18/TLR6/IL12RB1
P53_DN.V2_DN	P53_DN.V2_DN	109	0.632805	1.8698	3.37755e-07	2.04832e-06	4.81689e-07	2749	tags=34%, list=12%, signal=30%	TTR/HOXB3/HOXD13/HOXA2/CYP27B1/HS3ST3B1/SERPING1/FPR2/PLEK2/BCAT1/FABP4/SNAI1/PRICKLE3/SERPINF1/EVC/RAB38/ALOX5/SCN9A/C5AR1/CENPA/HOXA11/TLR1/H2AC13/CYP39A1/ENPEP/SLC27A6/LILRA2/ITGA4/CFD/IGFBP4/FKBP5/CNTF/NDC80/SLCO2A1/ANPEP/IGFBP6/TP73
RAF_UP.V1_UP	RAF_UP.V1_UP	164	0.589155	1.76748	3.359e-07	2.04832e-06	4.81689e-07	5054	tags=51%, list=23%, signal=40%	ABCC3/TNFAIP8/RSAD2/SOCS2/LAIR2/P3H2/PTGER4/S100A9/TFPI2/S100A8/PYGL/CD44/KCNN4/SKAP2/LAMC1/UPP1/TCIM/BACE2/HERC5/CYP1B1/MPZL2/ENPEP/CCR1/GPR37/NMI/MTMR11/ANGPTL4/NFE2L3/GALNT12/TES/CLDN1/PSMB9/DSC2/BLNK/CEBPD/NPC2/SMAGP/IMPA2/RCAN1/NDC80/ACSL1/CDK18/COTL1/PLS3/FZD5/GLRX/HSPA2/PPARG/CORO1A/FGF1/SAT1/HBEGF/CAST/SLC31A2/GCLM/GJA5/CLMN/HPGD/DBNDD2/NR4A3/KLF6/SEPTIN10/CDC42EP3/SEPTIN6/NTAN1/DUSP4/CRE…
AKT_UP.V1_UP	AKT_UP.V1_UP	132	0.60629	1.80712	3.89605e-07	2.21957e-06	5.21959e-07	5268	tags=53%, list=24%, signal=41%	HOXB9/SAA1/SAA2/KCNK5/GPX8/TNFRSF12A/PLAT/FABP5/ROPN1L/NIBAN1/SECTM1/IL1R1/TOM1L1/PLSCR1/PYGL/FAM3B/BACE2/MGARP/PDGFD/SPHK1/MYO5B/KCNE3/GCH1/MPZL2/LRG1/ANXA13/DUSP10/ATF3/RIPK3/TACSTD2/VAMP5/HCK/PLAGL1/GDPD2/H4C8/UNC5B/AK4/CARD19/TFRC/PACSIN3/UBE2C/CLMN/S100A14/ABCA7/GUSB/KLF6/KCNQ1/CD55/CXCL16/METRNL/SLC6A6/PTPN14/VAT1/SEPTIN9/NFIL3/IFIT2/LGMN/ACOT9/H4C9/PRKCH/H2BC17/SNHG11/PDK1/MAN2B2/DHCR24/SO…
TBK1.DF_UP	TBK1.DF_UP	258	0.541116	1.64451	3.83378e-07	2.21957e-06	5.21959e-07	6209	tags=52%, list=28%, signal=38%	SAA1/MMP9/EMP3/G0S2/PLAU/MCUB/NGFR/TNFAIP8/LSP1/RUNX1/TP73-AS1/PLAUR/IL1R1/S100A8/ADGRE5/SLC2A10/FZD6/HMOX1/CXCL8/ARAP3/WWTR1/STEAP1/SWAP70/STEAP1B/PROS1/GCH1/DUSP5/IL1A/DPY19L1/GALNT12/ATF3/PLPP2/HSD11B1/RGS3/TNFAIP2/TNFAIP3/MREG/CRABP2/SNX10/CASP7/PIK3CD/CCNJL/ANPEP/TPST1/HSPA2/AOPEP/SLCO3A1/RLN2/CORO1A/HBEGF/MICA/STX3/PTHLH/ZC3H12A/SH3TC1/EOGT/CYBRD1/KCTD14/PIP4K2C/ENDOD1/CHIC2/TP53I3/EFNA1/SL…
SNF5_DN.V1_DN	SNF5_DN.V1_DN	123	0.615991	1.82553	4.24908e-07	2.34949e-06	5.52512e-07	2669	tags=32%, list=12%, signal=28%	HOXB9/HOXA5/ABCA4/DSG2/NNMT/IL13RA2/DPEP1/CHODL/DES/CP/MCUB/LOXL4/MMP3/RGS16/FABP4/CCR7/TFPI2/TMEM176B/TMEM176A/ITGA3/FBLIM1/SLC16A3/TCIM/VNN1/ITGA7/OLR1/NFKBIZ/ANGPTL4/FRZB/RRAD/MYLK/C1QTNF1/EFEMP1/LY75/RNF128/MGST2/FOXD1/PPBP/SLCO3A1
AKT_UP_MTOR_DN.V1_UP	AKT_UP_MTOR_DN.V1_UP	148	0.598255	1.78846	5.38058e-07	2.89014e-06	6.79652e-07	4293	tags=42%, list=19%, signal=34%	SAA1/HOXB3/HOXB5/SAA2/KCNK5/GPX8/TNFRSF12A/PLAT/NIBAN1/MSR1/HLA-DQB1/IL1R1/PLSCR1/S100A8/PYGL/CXCL1/TGIF1/BACE2/APOC2/MGARP/SPHK1/MYO5B/GCH1/MPZL2/MVP/LRG1/ANXA13/DUSP10/ATF3/TACSTD2/VAMP5/HCK/RASAL3/FXYD4/PLAGL1/GDPD2/A4GALT/H4C8/AK4/JUNB/CARD19/ARRDC4/HBEGF/PACSIN3/EFNB2/SLC39A8/CLMN/ABCA7/GUSB/KLF6/KCNQ1/CD55/CXCL16/RNF19B/DUSP1/METRNL/SLC6A6/VAT1/NFKB2/NFIL3/KLF10/LGMN
P53_DN.V1_UP	P53_DN.V1_UP	159	0.578581	1.73466	1.21739e-06	6.35749e-06	1.49504e-06	4768	tags=47%, list=21%, signal=37%	COL3A1/ANXA1/RBP1/DKK1/G0S2/PLAU/COL1A2/PITX1/LOXL1/CRYBG1/KRT18/F3/COL13A1/LAMP3/AREG/MSLN/MYOF/CST6/TGFBI/SDC4/IRF1/ELF4/AHR/OLFML2A/ITGA2/ADM/IL18/SULF1/NR2F2/DSC2/TACSTD2/LHFPL2/ITGB4/LTBP1/MEST/FBLN2/SMAGP/EFEMP1/NDC80/PTPRH/SPRY2/CLDN3/PLCE1/IGFBP6/PPARG/LAMB2/CNN3/CNR1/VASP/EFNB2/CCN1/SYNJ2/MAFF/IFI27/CDH11/OIP5/SLIT2/TPBG/YAP1/DSP/TSPAN8/PTN/PODXL/CDKN2A/SH3GLB1/ZNF185/PPL/LRRC42/INHBB/CE…
RB_P107_DN.V1_UP	RB_P107_DN.V1_UP	111	0.623441	1.83883	1.3658e-06	6.93975e-06	1.63197e-06	4619	tags=50%, list=21%, signal=39%	COL1A1/COL5A1/COL6A2/COL1A2/SRPX2/LOXL1/S100A4/CD248/LCK/FSTL1/FBLN5/PCOLCE/SERPINF1/ACTG2/BGN/MRGPRF/CA2/E2F8/LGALS3BP/RRM2/KIF4A/CENPK/GTSE1/ASF1B/CDC45/FBLN2/CDK2/FKBP10/TMEM119/CHAF1B/TAGLN/COL16A1/TRPV2/COL6A1/TCF19/BICC1/NRM/NCAPH/CDH11/GINS4/MCM2/FBN1/POLE2/DUSP1/MCM5/E2F1/PCNA/RPA3/WDHD1/PTMA/RFC2/RBPMS2/CENPH/POLD1/CDKN1C
E2F1_UP.V1_DN	E2F1_UP.V1_DN	170	0.567911	1.71137	1.60968e-06	7.96368e-06	1.87276e-06	4780	tags=42%, list=22%, signal=34%	STAC/COL3A1/ANXA1/PLAT/ALDH3A1/CD3E/MMP7/PDZK1IP1/GBP2/MX1/SNAI1/IL1R1/F3/C3/CCL2/PTGS1/CXCL1/CYTIP/LXN/CYP1B1/GADD45A/ADAMTS1/ATP2A3/UNC93B1/IL18/NEAT1/NFKBIZ/FAS/ANGPTL4/RUNX2/MDK/APBB1IP/AJUBA/HLA-E/A4GALT/PLIN2/PLXND1/PLA2G4A/TGFB1I1/MTARC2/SERTAD1/AMPD3/EFNA4/SIX5/DTX2/LAMA4/DOK1/ZC3H12A/STAT6/TRIB3/TGM2/LGALS2/TGFB3/TNXB/ERBB3/EVI2A/ALAS2/ASL/STAT3/NPR1/ANXA4/IFIT2/EPS8/XBP1/DAB2/NFKB1/POLD…
PKCA_DN.V1_DN	PKCA_DN.V1_DN	122	0.60531	1.79327	1.94385e-06	9.37038e-06	2.20356e-06	3247	tags=35%, list=15%, signal=30%	SAA1/HOXC8/SAA2/ABCA4/CA3/TNFRSF12A/PLAU/GBP1/CP/CFH/CD79B/HS3ST3A1/METTL1/CD44/BATF3/MBOAT1/CLEC7A/TLR2/ITGB7/TNNI2/ADM/TIFA/RHOJ/NFKBIZ/CD19/FERMT3/CFD/SP140/MSC/FXYD4/CENPF/PROCR/MYO1B/MAP3K6/APOC1/WAS/HK2/TRPV2/KANK2/ZC3H12A/COCH/ZDHHC1/GASK1B
WNT_UP.V1_UP	WNT_UP.V1_UP	126	0.597867	1.77432	2.43171e-06	1.1429e-05	2.68768e-06	2578	tags=29%, list=12%, signal=26%	POSTN/HOXD10/IGF2/GDF15/SLN/FABP5/GLI1/TFF3/IL6/CD96/HTRA3/MFAP2/FPR2/CD74/PKIB/SFN/SERPINF1/CCL2/LCN2/SDC4/ISLR/ENTPD2/CXCL1/MYO5B/OLR1/HOXD3/INSRR/LRG1/GALNT6/RBPMS/CYP2S1/MYRF/CKMT2/ADAM28/A4GALT/TGFB1I1/EYA2
KRAS.LUNG_UP.V1_DN	KRAS.LUNG_UP.V1_DN	90	0.645365	1.87304	3.10541e-06	1.42394e-05	3.34858e-06	3347	tags=43%, list=15%, signal=37%	POSTN/COL2A1/IGFBP2/WNT16/VAV3/CCR2/PSORS1C1/CD248/NGFR/GPNMB/KRT16/AKR1B10/ACP3/S100A7/CXCL14/OLFML2A/PROM1/PROC/CD22/HTR1D/TRGV7/IL10RA/INPP5D/TNFSF10/RTP4/PDE6B/CLCA4/CRABP2/HAAO/PIK3C2B/MXRA8/PRODH/FCGR3B/DHX58/ZC2HC1C/ADORA3/LYPD3/MAP3K1/GAS1
ATF2_UP.V1_UP	ATF2_UP.V1_UP	140	0.577972	1.72583	4.09725e-06	1.834e-05	4.31289e-06	4621	tags=47%, list=21%, signal=38%	COL2A1/IGF2/SERPINB2/RBP1/G0S2/PLAU/CD3D/PITX1/EMILIN2/S100A4/STRA6/FABP4/PLBD1/ADM2/ARSJ/ASPN/ISLR/UPP1/TCIM/CD8A/LILRA5/STEAP1B/TCIRG1/CD19/GALNT6/CLDN1/LTB/TK1/HOXD1/CENPU/MELK/CARD9/APOD/ADAM28/FGF20/STAT5A/SH3BGR/C3AR1/DNASE2B/NCAPG/NNAT/GRAP/DENND2A/FGR/GNA15/DTL/HPGD/IL32/GNA14/PLK4/FOXL2/CA14/TRIM14/RAD51/HSPA6/PRKCD/PODXL/GINS2/TRPM2/NFKBIB/SULT1B1/PTGER1/NES/POLD1/LIPE/FOXM1
CRX_DN.V1_DN	CRX_DN.V1_DN	106	0.609113	1.7997	7.33123e-06	3.13243e-05	7.3663e-06	4744	tags=57%, list=21%, signal=45%	TIMP1/TNFRSF12A/PLAT/FABP5/COL4A2/SERPING1/CNMD/SEL1L3/SOCS3/ANXA2/TAGLN2/OSMR/TUBB6/KDELR3/PCOLCE/CD44/S100A6/TMEM176A/SKAP2/TMBIM1/C1QC/FABP7/LXN/PPP1R14A/CEBPA/HLA-A/BCL3/CEBPD/FKBP5/MAP3K8/IRF5/FOXD1/S100A16/JUNB/COL16A1/CEBPB/SMOC2/PHOSPHO1/PLOD2/EFNA1/GFAP/TGM2/SLC26A4/CHAC1/PRDM1/RAI14/GNG11/H6PD/JAM3/EGR1/FUT4/NAB2/KLF10/GLIPR2/NFKB1/INHBB/CDKN1A/SPSB2/CRYBG3/C1QTNF6
IL21_UP.V1_UP	IL21_UP.V1_UP	138	0.574704	1.71488	7.25695e-06	3.13243e-05	7.3663e-06	4015	tags=41%, list=18%, signal=33%	CHI3L1/IBSP/HOXB2/LIF/C6/ROR2/COL15A1/PTX3/SPP1/DIRAS3/VDR/CPA4/SPRY4/RSAD2/FOXD2/CD79B/NKG7/LAMP3/ST6GALNAC2/TEAD3/CYP27A1/SCN9A/SPINT1/LINC01711/CD6/MPZ/PYGM/SLC49A3/RDH5/CFD/PLPP2/MUC1/LILRB4/TLR3/TLR6/BOK/MMP25/LAG3/IQCG/XPNPEP2/CLDN7/S100A1/LYL1/ECM1/PIM1/ABCA6/ZC3H12A/CXCL12/EHF/EGR2/TPBG/MYOZ3/NKX2-8/CDH5/RPP25/MAFK
CORDENONSI_YAP_CONSERVED_SIGNATURE	CORDENONSI_YAP_CONSERVED_SIGNATURE	50	0.707243	1.95115	8.41269e-06	3.51463e-05	8.2651e-06	4903	tags=74%, list=22%, signal=58%	SH2D4A/SERPINE1/TGFB2/THBS1/FSTL1/ITGB2/CDC20/CDKN2C/FLNA/SHCBP1/TK1/BIRC5/CENPF/PMP22/DLC1/MDFIC/TOP2A/HEXB/EMP2/CCN1/BICC1/ECT2/HMMR/SLIT2/LHFPL6/GADD45B/TGM2/GAS6/DUSP1/ITGB5/DAB2/FSCN1/COL4A3/CCN2/AXL/NDRG1/GGH
ATF2_S_UP.V1_UP	ATF2_S_UP.V1_UP	142	0.573993	1.71436	8.6485e-06	3.5346e-05	8.31206e-06	3387	tags=39%, list=15%, signal=33%	TTR/HOXD10/BARX1/PLAU/PITX1/S100A4/DIRAS3/FOXJ1/CRYBG1/RSAD2/SCIN/S100A9/ARSJ/IL20RA/CXCL8/CXCL1/UPP1/TCIM/ADAMTSL4/CD8A/STEAP1B/SLC13A3/KIF20A/RPL39L/NFE2L3/MPZ/GALNT6/KIF23/CLDN1/PSMB9/CCDC81/TK1/HOXD1/APOL6/PMEL/CENPU/DLEC1/VPREB3/SH3BGR/C3AR1/MYO7A/TOP2A/NNAT/CUBN/CDKN3/TMEM156/LRRC17/DYSF/EFNB2/PIR/GNA15/DBNDD1/NIPAL3/IL32/GNA14
KRAS.KIDNEY_UP.V1_DN	KRAS.KIDNEY_UP.V1_DN	78	0.645287	1.84654	1.03538e-05	3.89303e-05	9.15494e-06	2311	tags=37%, list=10%, signal=33%	GATA4/CHRNA9/CXCL10/PTGER2/CXCL11/IL6/RSAD2/MX2/MX1/OAS1/PDCD1/KLHDC8A/ASPN/CCL20/LILRA4/CD14/ACE/H2AC13/THBD/TREM2/TYROBP/CNN1/IFI44L/INSL5/ACTC1/LILRB4/MSC/CARD9/PHLDA3
EIF4E_DN	EIF4E_DN	89	0.630145	1.8272	1.02136e-05	3.89303e-05	9.15494e-06	3767	tags=30%, list=17%, signal=25%	SAA1/GALNT5/MMP9/PLAU/LOXL1/DENND2D/TP73-AS1/C3/CTSC/SQOR/ALPK1/IQGAP1/CLDN23/CYP1B1/FAS/ANGPTL4/FRMD4B/FNDC3B/STAT5A/SVIL/FUCA1/CASP10/UBA7/ITPRIP/ADAM9/CD55/TRIM47
KRAS.PROSTATE_UP.V1_DN	KRAS.PROSTATE_UP.V1_DN	95	0.615269	1.79298	9.94457e-06	3.89303e-05	9.15494e-06	2275	tags=33%, list=10%, signal=29%	IBSP/SERPINB2/IGLV2-14/TRH/LUM/CD96/CFI/GPNMB/DIRAS3/SOD3/KRT16/MAOB/CD48/MLANA/PI3/FOXD2/ENPP1/S100A8/HLA-DMB/SOX10/LCN2/VGLL3/IGFBP3/ACSS3/S100A7/ITGB7/GNGT2/RRAD/CRYGD/PTPRH/EGF
TGFB_UP.V1_UP	TGFB_UP.V1_UP	151	0.566848	1.69691	1.01954e-05	3.89303e-05	9.15494e-06	5505	tags=45%, list=25%, signal=34%	IGLV2-14/LIF/PDLIM4/WNT16/CLCF1/CD163/STC1/S100A3/SKAP1/TNFAIP8/CASP5/SNAI1/PDGFA/ITGA5/CST6/KCNN4/SPHK1/WNT4/LTBP2/MPZL2/DPY19L1/HLX/ATF3/HTR1D/HRH1/ELK3/RRAD/CKMT2/PMP22/DLC1/FOXD1/LMCD1/PIK3CD/SLCO2A1/SLC26A2/F2RL1/TMC7/FGF1/TAGLN/JUNB/COL16A1/FLT4/BHLHE40/JUN/GADD45B/RNF19B/AKAP12/TRIB1/CSF1R/PDGFB/LIPG/TBX3/KLF10/CCN2/ID3/SMAD6/NFATC4/PMEPA1/PXDC1/SMTN/PFKFB3/SOCS6/SEC14L2/FNBP1L/ELL2/ZFP36L…
MYC_UP.V1_DN	MYC_UP.V1_DN	137	0.577256	1.72379	1.10615e-05	4.05009e-05	9.52428e-06	4299	tags=39%, list=19%, signal=32%	LMNTD2-AS1/MMP9/HOXB2/SPOCD1/GPRC5A/PLAT/IL6/TGM5/NGFR/MMP3/PRSS33/GAS2L2/IL1R1/S100A9/HOXC4/S100A8/NID2/CCL20/GBP3/DEPP1/TLR2/SERPINB1/MGARP/SAMD9/IL18/MTMR11/ANGPTL4/C1orf54/TNFAIP2/CDCA8/CLCA4/MAP3K6/NRP1/IRAK2/RHBDL2/PBX3/STPG1/MEGF6/TRIM56/TRPM4/LYPD3/H2AC6/FGD2/BCO2/TGM2/SPNS3/PLK1/C16orf74/B9D2/HEG1/CD1D/ASAP3/GINS1/TEP1
GCNP_SHH_UP_EARLY.V1_DN	GCNP_SHH_UP_EARLY.V1_DN	139	0.573488	1.71118	1.12024e-05	4.05009e-05	9.52428e-06	4577	tags=38%, list=21%, signal=30%	HOXB9/HOXB3/PITX2/DLK1/CYP27B1/CCR2/MGP/HTRA3/CRYBG1/MX2/IL1R1/S100A9/SLC43A3/TMEM176A/CCL2/SLC7A3/TM4SF1/EMP1/MYO5B/CYBA/CNN1/ITGA4/LAT2/LGALS9/VAV1/LCP1/MYRF/CCRL2/SH3BGR/CRABP2/PLA2G4A/NR5A2/ZNF436/FAM241A/GUSB/GNA14/PIGT/MAN2B1/GLB1L/IER2/JAM3/SOX18/EGR1/IRF3/HAS2/CRYGS/WIPF1/PHLDB2/HES1/H2BC21/PEPD/POLD4/LYST
KRAS.600.LUNG.BREAST_UP.V1_DN	KRAS.600.LUNG.BREAST_UP.V1_DN	194	0.535261	1.62036	1.23208e-05	4.37038e-05	1.02775e-05	4117	tags=40%, list=19%, signal=33%	HOXB3/COL2A1/IGF2-AS/IGFBP2/PAX2/RARRES2/VAV3/ADGRE1/GBP1/SERPING1/PSORS1C1/CD248/PLAC8/CIITA/COL5A2/KRT16/AKR1B10/GBP2/DENND2D/PLBD1/EPHX3/CD5/S100A7/RAMP3/SCN7A/THNSL2/CXCL14/CD6/OLFML2A/PROM1/PROC/HTR1D/IFI44L/LGALS9/COL5A3/MYL9/INPP5D/TNFSF10/RTP4/PDE6B/IMPA2/DENND1C/P2RX1/FGFR3/PLAAT4/CRABP2/PLXND1/MAML3/BTN3A2/SELENBP1/CD36/PIK3C2B/IQCG/FGF1/MXRA8/DTX2/NAALADL1/WHRN/ERAP2/ADORA3/APOL3/KCNMB…
PDGF_UP.V1_DN	PDGF_UP.V1_DN	97	0.619266	1.80781	1.43999e-05	4.92214e-05	1.1575e-05	4105	tags=45%, list=18%, signal=37%	IGHM/TUBA4B/COL1A2/PLAT/GNLY/CCL13/MXRA5/ANXA2P2/AOX1/HLA-DPA1/IL7R/FPR3/C2/FCGR2A/ARSF/VENTX/ACADL/SLC28A1/PLAG1/DUSP10/TACSTD2/KL/HOXD1/TNFSF8/LRP2/BCL3/LTBP1/SP140/SLC22A18/LY86/LY75/EGF/SLC26A2/CUBN/ARSL/CYB5R1/BHLHE40/JUN/COL4A5/ACVRL1/SLC26A4/EVI2A/PF4/SEMA3C
RB_DN.V1_DN	RB_DN.V1_DN	105	0.602379	1.77873	1.41931e-05	4.92214e-05	1.1575e-05	4864	tags=44%, list=22%, signal=34%	H19/AGR3/MMP9/MOXD1/ADAM12/CELSR1/CISH/TNC/GJB2/CD44/BST2/CTSC/CAV1/IGFBP3/SLC7A3/SMIM3/GADD45A/ADAMTS1/MVP/FLNA/DDIT3/LGALS9/COL18A1/S1PR5/SLCO2A1/H2BC4/PPBP/F2RL1/S100A16/TMEM140/ATF5/MYADM/BHLHE40/CHAC1/HSPA5/PDGFB/CREB3L2/USP18/PSMB10/NFIL3/PSME2/CAP1/CD9/DUSP14/H2BC17/NDRG1
JNK_DN.V1_UP	JNK_DN.V1_UP	137	0.572887	1.71075	1.71344e-05	5.75227e-05	1.35272e-05	4146	tags=39%, list=19%, signal=32%	HOXA2/PDE6A/TNFSF14/IL13RA2/ADAM12/CXCL11/SCNN1B/PTPN22/SKAP1/C1S/AKR1B10/ADAMTS3/ECM2/HOXC4/NID2/RUNX3/CCL22/CXCL8/IGFBP3/ARSF/CTSZ/SLC25A24/ACADL/GCH1/ANXA13/BIRC3/TFEC/CEACAM4/SLC7A7/DDIT3/RUNX2/CD37/KCNJ5/PMEL/IL10RA/RRAD/TDO2/IL12RB1/EYA2/EPHA3/ELN/MPL/PECAM1/SNAI2/GPX7/MDM2/RASSF8/YAP1/SLCO2B1/SLC25A20/ABCD1/GPR37L1/CD83
SRC_UP.V1_DN	SRC_UP.V1_DN	135	0.568899	1.69628	2.40044e-05	7.91723e-05	1.86184e-05	3983	tags=35%, list=18%, signal=29%	SERPINB2/HOXB2/COL8A1/ADGRE1/PLAT/PHLDA2/TGM5/MMP3/IRX5/GFRA3/DPYD/PRSS33/IL7R/PTGER4/S100A9/ARSJ/HS3ST3A1/NID2/IFI6/DEPP1/MGARP/S1PR3/E2F8/CPPED1/EMB/TREML1/FRMD4B/RFTN1/CLCA4/MAP3K6/ANO7/NRP1/IRAK2/PIK3C2B/MEGF6/ZNF436/SH3TC2/KCNMB3/LYPD3/PLK4/SPNS3/MCM5/SOAT1/RAB33B/COBL/CENPS/CDCA7
KRAS.300_UP.V1_DN	KRAS.300_UP.V1_DN	84	0.628503	1.82325	2.56623e-05	8.26382e-05	1.94334e-05	2984	tags=45%, list=13%, signal=39%	HOXB8/IGF2-AS/PODNL1/GBP1/PSORS1C1/CIITA/KRT16/AKR1B10/NKX6-1/MX2/MX1/OAS1/CTSW/PLBD1/ACTG2/BST2/S100A7/OLFML2A/PROC/TREM2/HTR1D/IFI44L/MYL9/RRAD/TNFSF10/CRYGD/RTP4/PDE6B/DENND1C/P2RX1/FGFR3/CRABP2/MAML3/HAAO/TAGLN/MXRA8/DTX2/WHRN
HOXA9_DN.V1_DN	HOXA9_DN.V1_DN	178	0.545064	1.64725	2.59343e-05	8.26382e-05	1.94334e-05	5124	tags=40%, list=23%, signal=31%	HOXA9/HOXA5/IGFBP2/FCGR2C/ALDH1A3/FCGR2B/SPP1/COL9A3/BCAT1/RGS16/SPON2/EEF1AKMT3/ACP3/FCGR2A/CST7/FZD6/MFAP4/E2F8/ADM/MICB/TES/CD300A/CEP55/ITGA4/CDC45/APOBEC3B/FKBP5/SLC1A5/SMAGP/PLAGL1/SPRY2/MEIS1/CDC6/MYO1B/HHEX/BRCA2/ARHGAP11A/ATF5/RGS1/NPTX2/ORC1/SLC2A5/COCH/BHLHE40/TMEM106C/GINS4/PLK4/TRIB3/SHMT1/FANCI/TBXA2R/HSPA6/SOX18/EGR1/HACD1/RBM38/ITGB5/EPS8/GINS1/SLC29A1/TRMT2B/ZIC1/NPR3/MEX3D/HILPD…
MEL18_DN.V1_DN	MEL18_DN.V1_DN	120	0.583334	1.72905	2.68724e-05	8.42002e-05	1.98007e-05	4245	tags=43%, list=19%, signal=35%	NTS/HOXB13/DLK1/EYA4/VAV3/CNMD/DIRAS3/PLEKHA4/DPYD/MAOB/COL9A3/SOCS2/OAS1/COL14A1/IL1R1/TMEM176B/TMEM176A/IFI6/BST2/SKAP2/CA2/CXCL14/SEMA3E/TENT5A/PROM1/SULF1/MVP/SLC16A4/C1orf54/FRMD4B/BLNK/IFITM1/H4C8/CRABP2/A2M/UNC5C/EPHA3/PIK3C2B/DDX60/JUP/TSPAN1/OSBPL10/AQP3/IFI27/SELENOP/EGFL6/EGR1/PDE7B/GNG7/IRF9/IFIT2/WFDC2
ESC_V6.5_UP_LATE.V1_DN	ESC_V6.5_UP_LATE.V1_DN	148	0.558153	1.66857	3.20638e-05	9.88195e-05	2.32386e-05	4203	tags=35%, list=19%, signal=29%	TIMP1/ANXA1/SERPINE1/GLI1/S100A4/MGP/TCEA3/SPP1/SOCS3/LCK/PLEKHA4/SPRY4/LGALS3/CAVIN1/SFN/PCOLCE/LOX/BGN/S100A6/DAPP1/ICAM1/ITGB7/TM4SF1/EMP1/GADD45A/E2F8/C16orf89/KIF18A/ANGPTL4/DYRK3/PLK3/BCL3/MSC/ZFP57/FBLN2/FZD5/ESRRB/AOAH/FOXD3/ACACB/GLI2/DEDD2/TRIB3/CHAC1/C16orf74/ETV4/ABCA2/TCF15/TLE4/RPP25/PCOLCE2/C11orf24
VEGF_A_UP.V1_UP	VEGF_A_UP.V1_UP	160	0.548327	1.64305	3.82289e-05	0.00011592	2.726e-05	3155	tags=29%, list=14%, signal=25%	HOXB5/ABCA4/DSG2/CHRNA1/CXCL11/FCGR2B/GLI1/SERPINA3/AKR1B10/ISG20/CD5/NKG7/APOBEC3G/HLA-DMA/EMILIN1/CCL2/SDC4/ICAM1/PTPRC/ARL4C/TKTL1/MYO1F/CD19/MTMR11/CD79A/MMP2/DDIT3/ATF3/LTB/ITGB4/MYL9/NCF2/RGS3/CRYGD/IRF5/ENPP2/PSMB8/DENND3/MATN2/RELB/TAGLN/TRAF5/TRAF1/ARC/ECM1/UBA7/KCNMB1
PGF_UP.V1_UP	PGF_UP.V1_UP	168	0.544443	1.63952	5.23875e-05	0.000156331	3.67632e-05	5002	tags=30%, list=23%, signal=23%	TTR/COL8A1/CPA3/KIAA0040/FABP4/CFH/TFPI2/GRB14/CCL22/ROR1/ANGPT2/CLEC2B/ITGA2/ATP2A3/MMRN1/SULF1/GPR37/PHEX/SMC4/LTBP1/TNFSF10/RASGRP3/NAT1/CRYZ/PSPHP1/PLA2G4A/SAT1/LRRC17/ADAM9/HS2ST1/SLC38A6/AGA/GJA4/TSPAN8/SLC4A7/MAFK/RPGR/LGALS8/TMED5/CD2AP/ARMCX2/ABCA8/PSPH/MIPEP/CRYBG3/STXBP3/DNAJC3/CPD/RAP1A/MAGOH
BMI1_DN.V1_DN	BMI1_DN.V1_DN	113	0.572214	1.69185	5.60097e-05	0.000164529	3.86909e-05	2456	tags=27%, list=11%, signal=25%	HOXB13/WNT16/VAV3/TP63/ALX4/CNMD/S100A4/PLEKHA4/DPYD/MAOB/COL9A3/SOCS2/SNAI1/IL1R1/TMEM176B/CES1/TMEM176A/IFI6/BST2/CITED1/CA2/CYP11A1/SEMA3E/PADI2/ARHGAP15/MVP/IFI44L/C1orf54/IFITM1/H4C8/TSPO
AKT_UP_MTOR_DN.V1_DN	AKT_UP_MTOR_DN.V1_DN	155	0.542275	1.62619	6.6658e-05	0.000192796	4.53383e-05	3964	tags=35%, list=18%, signal=29%	IBSP/AQP5/PHLDA2/C1R/CD248/TYMP/CHAD/COL5A2/DPYD/MYO1G/PLEK2/NCMAP/KCNN4/MOCOS/CAV2/WEE1/FAM20C/STEAP1/TM4SF1/S1PR3/PROM1/FAS/ANGPTL4/OGN/GSDMA/IL7/PDIA5/EFEMP1/STAB1/IL13RA1/TNFRSF19/FKBP10/SH3BGR/ADORA1/PLA2G4A/GNAT2/RGS19/IL17RC/SLCO3A1/SERPINF2/MYB/ISYNA1/MLXIPL/HIC1/HPGD/TP53I13/GAS1/GNA14/PI16/ITPKB/FBN1/SHMT1/GNG11/ERF
E2F3_UP.V1_DN	E2F3_UP.V1_DN	119	0.568102	1.68488	7.39423e-05	0.000210623	4.95307e-05	4178	tags=32%, list=19%, signal=26%	LIF/GPRC5A/PLAT/IL6/BDKRB2/TGM5/CIITA/MMP3/PRSS33/GAS2L2/ADGRE2/SH2D2A/ADM2/HOXC4/APOBEC3G/DOK7/CLEC7A/TLR2/SERPINB1/THBD/TREM2/ARHGAP18/NCKAP1L/STK40/BRCA2/IRAK2/STPG1/MEGF6/SH3TC1/LYPD3/BCO2/TGM2/SPNS3/SLCO2B1/C16orf74/HSPA6/RAB43/B9D2
ESC_J1_UP_EARLY.V1_DN	ESC_J1_UP_EARLY.V1_DN	149	0.546604	1.63439	7.585e-05	0.000212833	5.00503e-05	4610	tags=38%, list=21%, signal=31%	ANXA1/TNFRSF12A/SERPINE1/GBP1/PTPN22/SOCS3/SPRY4/GBP2/ZBP1/SFN/DAPP1/IGFBP3/APOBR/ANGPTL4/TREM2/CNN1/ANXA5/LTB/DUSP6/MYL9/BCL3/GAP43/ZFP36/CEBPD/ZFP57/NINJ2/PPCS/ADAP2/H2BC4/RELB/TAGLN/JUNB/HASPIN/FOXD3/EMP2/ATF5/CCN1/DPYSL5/UBA7/GNA14/TRIB3/C16orf74/ETV4/ERF/EGR1/TCF15/TLE4/RPP25/TMC6/STAT3/C11orf24/NAB2/BMP1/LPP/INHBB/HYAL2/ID3
KRAS.BREAST_UP.V1_UP	KRAS.BREAST_UP.V1_UP	84	0.609306	1.76756	8.14098e-05	0.000225074	5.2929e-05	4141	tags=54%, list=19%, signal=44%	IGF2/MMP9/LIF/ESM1/WNT16/IL13RA2/STC1/ADAMDEC1/COL9A3/TLR8/SPON2/IL2RG/TMEM176A/ACP3/CCL22/IGFBP3/CYB5R2/H2AC13/LILRA6/IL1R2/RMST/BIRC3/KCNK15/CFAP43/NDUFA4L2/HSD11B1/NFE2/TNFAIP3/SPRY2/KLK6/A2M/GLRX/PPBP/TRAF1/IL1B/LYL1/MAPK4/TFPI/AKAP12/PPP1R15A/PRDM1/ETV2/CASS4/GPR37L1/HAS2
KRAS.600.LUNG.BREAST_UP.V1_UP	KRAS.600.LUNG.BREAST_UP.V1_UP	177	0.52547	1.58661	8.44628e-05	0.00023013	5.4118e-05	4141	tags=46%, list=19%, signal=38%	MMP9/LIF/ESM1/IL13RA2/G0S2/STC1/COL9A3/SH2D2A/PDCD1LG2/ISG20/PLAUR/FBP1/TMEM176B/SOX10/SEMA3A/DNAH9/CCL20/CCL22/LY96/CXCL8/IGFBP3/CXCL1/ADA2/ADAM19/LAMC3/SPHK1/ITGA2/LILRA6/IL1R2/CD247/RMST/HPN/ANGPTL4/BIRC3/KCNK15/DDIT3/PLVAP/CD37/LAT2/RDH5/NTRK1/HOXD1/HSD11B1/TNFAIP3/SPRY2/CHST2/LAG3/A2M/RNASE1/GLRX/PPBP/GYPC/TRAF1/SEMA3B/HBEGF/TMEM156/IL1B/TSPAN1/LYL1/FLT4/ANO1/HIC1/TMEM158/GPR4/SLIT2/TFPI/GFA…
VEGF_A_UP.V1_DN	VEGF_A_UP.V1_DN	166	0.538899	1.62009	9.15408e-05	0.000245852	5.78152e-05	5176	tags=37%, list=23%, signal=28%	SERPINB2/DKK1/CPA3/IL6/ITGB3/FABP4/MMP14/TGFBI/ACE/CENPE/CENPA/ANGPT2/STEAP1/DLGAP5/ITGA2/MMRN1/ADTRP/GPR37/BUB1B/EXO1/RRM2/KIF23/SMC4/CDC45/MEST/FKBP5/BIRC5/NDC80/CCNB1/CRYZ/BUB1/NRP1/SAT1/CDKN3/LRRC17/CCNB2/ATP8B3/ARHGAP29/TTK/VEGFC/OSTF1/HMMR/GPR4/PLK4/ADAM9/LMNB1/TSPAN8/SLC4A7/MAFK/RPGR/SULT1B1/INHBB/ROM1/SPTLC2/LRRFIP1/CKS2/BAK1/RAP1A/CTNNAL1/BCL10/CYB561D2
BMI1_DN_MEL18_DN.V1_DN	BMI1_DN_MEL18_DN.V1_DN	120	0.565039	1.67482	0.000114297	0.000302647	7.11711e-05	3397	tags=33%, list=15%, signal=28%	ABCA4/DLK1/EYA4/VAV3/CNMD/MXRA5/S100A4/DIRAS3/DPYD/MAOB/COL9A3/SOCS2/SECTM1/COL14A1/IL1R1/TMEM176B/TMEM176A/IFI6/BST2/CYTL1/CA2/SPINT1/ARSD/CXCL14/NR2E1/SEMA3E/ITGA7/PROM1/NEAT1/SLC16A4/C1orf54/IFITM1/A2M/UNC5C/DDX60/TSPAN1/OSBPL10/FCGRT/AQP3/IFI27
ERBB2_UP.V1_UP	ERBB2_UP.V1_UP	169	0.526796	1.58719	0.000149703	0.000390891	9.19229e-05	4256	tags=36%, list=19%, signal=29%	ABCC3/GDF15/TNFRSF11B/HOXB7/LOXL1/CSTA/SERPINA1/NIBAN1/AKR1B10/PTGER4/IL1R1/ST6GALNAC2/S100A6/SLC2A10/VWA1/KCNN4/CXCL8/CAPN5/SPAG4/BACE2/CYP1B1/ST8SIA4/MPZL2/ANGPTL4/GALNT12/PLPP2/MUC1/ITGB4/DUSP6/BCL3/TENT5C/APOBEC3B/NPC2/RFTN1/P4HA2/ULBP2/CXCR4/MYO1D/HSPA2/SAT1/LAMB2/PACSIN3/CAST/VASP/BCAM/TSPAN1/CLMN/WIPI1/AQP3/DBNDD2/EPB41L4A/SEPTIN10/DUSP4/CREB3L2/SLC6A6/B3GALT4/MXRA7/PLPP1/NOTCH3/DAB2
NOTCH_DN.V1_DN	NOTCH_DN.V1_DN	123	0.555471	1.64618	0.00016277	0.000419188	9.85772e-05	4883	tags=45%, list=22%, signal=35%	HOXA3/IGLC2/DLK1/CXCR3/SLN/PLAT/SERPINE1/PTCRA/HLA-DRA/GPR65/IL7R/SPRY4/VNN2/TFPI2/GZMB/CA2/ARSD/ITGA7/LPAR6/ACADL/ADTRP/RPL39L/CCDC81/TRGV7/TNFSF10/SP140/MYO1E/VPREB3/MMP25/C3AR1/MYO1D/AOPEP/BCAS1/CD209/ATP8B3/FSTL3/ZC3H12A/SH3TC1/CLIC2/FCGRT/EPB41L4A/RASSF8/CD27/TBX3/NOTCH3/COQ8B/HES1/SNED1/E2F2/NID1/MAGEC3/PHKG1/ZSCAN5A/DNAJC3/VEGFD
GCNP_SHH_UP_LATE.V1_UP	GCNP_SHH_UP_LATE.V1_UP	153	0.529285	1.58602	0.000168496	0.000428071	0.000100666	3983	tags=29%, list=18%, signal=24%	IGF2/CCR2/GALNT3/DES/GBP2/SOCS2/CD5/CASP4/TEAD3/LOXL2/SQOR/PTPRC/CD6/E2F8/DLGAP5/RRM2/SMC4/TK1/MUC1/TNFSF10/KIF2C/LLGL2/BOK/SARDH/CDC25C/AURKA/NR5A2/TOP2A/SGO1/ELOVL2/CLIC4/NECTIN2/AURKB/MYB/MIS18BP1/CHEK1/CDK1/KIFC1/TRIP13/MCM5/TMOD3/SDC2/SERPINB9/CDCA7
LTE2_UP.V1_UP	LTE2_UP.V1_UP	162	0.534454	1.60156	0.000182067	0.000456381	0.000107324	5085	tags=42%, list=23%, signal=33%	ABCC3/MMP9/TNFRSF11B/SERPINA1/AOX1/PTGER4/IL1R1/ACTG2/SLC2A10/BACE2/CYP1B1/PROS1/CD302/GCNT1/IGFBP5/GALNT12/DSC2/RAB27A/PLPP2/TK1/PSTPIP2/TENT5C/NPC2/RFTN1/RCAN1/PLAGL1/P4HA2/ULBP2/ADORA1/CXCR4/SLC26A2/RLN2/CDKN3/CLIC3/MBP/PBK/GCLM/CLMN/EHF/EPS8L1/AQP3/GNA14/QPRT/AKAP12/SEPTIN10/RHOQ/POLE2/DUSP4/SOAT1/CREB3L2/KIF13B/TMC6/P2RX4/DAB2/ENOSF1/CEMIP/SPTLC2/PRKCH/SCARA3/FAM117A/GGH/GLTP/C4orf19/SLC12A2…
KRAS.LUNG.BREAST_UP.V1_DN	KRAS.LUNG.BREAST_UP.V1_DN	92	0.577308	1.67854	0.000214397	0.000530352	0.000124719	4318	tags=50%, list=19%, signal=40%	COL2A1/IGF2-AS/IGFBP2/RARRES2/VAV3/ADGRE1/CD248/COL5A2/KRT16/AKR1B10/PLBD1/S100A7/RAMP3/SCN7A/THNSL2/CXCL14/CD6/OLFML2A/PROC/IFI44L/LGALS9/MYL9/INPP5D/TNFSF10/RTP4/PDE6B/P2RX1/FGFR3/CRABP2/CD36/PIK3C2B/MXRA8/DTX2/ERAP2/KCNMB1/CYP21A2/EPB41L4A/C5AR2/SLC6A9/COBL/KIF25/TRPM2/SCARF1/MXD3/EPHX2/SYNDIG1
CYCLIN_D1_UP.V1_UP	CYCLIN_D1_UP.V1_UP	151	0.532866	1.59519	0.000221446	0.000540673	0.000127146	4077	tags=35%, list=18%, signal=29%	SLC18A3/HOXB13/PAX2/CXCR3/SLN/COL4A2/FCGBP/BATF/MSN/HSPG2/CD52/HK3/NKG7/TFPI2/MSLN/EPHA2/LTBR/CTF1/GADD45A/THBD/RPS6KA1/RASSF7/ADRA2B/PLK3/NFE2/CEBPD/ZYX/GGT5/TAP1/STAT5A/SGCA/KLK6/IFITM1/FZD5/ANPEP/S100B/TAGLN/TRAF1/PLOD1/TGFB1/CETP/CCIN/CASP3/RRAS/SLC6A9/CHRNA5/MYL6/ETV4/HSPA1B/EGR1/ABCA2/GLB1/SELPLG
MTOR_UP.V1_UP	MTOR_UP.V1_UP	129	0.540298	1.6075	0.000243127	0.000585999	0.000137805	4239	tags=40%, list=19%, signal=32%	TNFRSF12A/PLAT/FABP5/FNDC7/CCL5/OAS2/LGALS3/PYGL/SIGLEC1/BST2/SP100/HMOX1/FAM3B/STEAP1/MGARP/MAK/KCNE3/GGACT/GCH1/CDC20/RRM2/NEIL3/GSDMA/ATF3/CPPED1/ADRA2B/NABP1/IFI35/TMEM106A/MS4A7/AK4/TFRC/NIPSNAP3A/UBE2C/TCF19/ISYNA1/S100A14/HIVEP3/CDK1/KIF9/H6PD/MCM5/PTPN14/ABCA2/USP18/MBL1P/PCNA/LIPG/SEPTIN9/RIOX2/IFIT2
ATM_DN.V1_UP	ATM_DN.V1_UP	95	0.573172	1.6703	0.000269025	0.000640211	0.000150554	3885	tags=39%, list=17%, signal=32%	TTR/CPA3/F13A1/TREM1/S100A3/CIITA/NGFR/COL9A3/XAF1/ECM2/FCGR2A/GRIK1/VEGFA/CYP4F3/SPAG4/CD8A/CD19/S100A2/PDE6G/GJB1/IGFBP4/CSF3R/FCGR1A/SARDH/ULBP2/CD36/SIPA1/TRAF1/DYSF/FSTL3/CEBPE/CLIC2/EFNA1/LHB/PLTP/P2RY1/H6PD
RELA_DN.V1_DN	RELA_DN.V1_DN	93	0.579079	1.68504	0.000292832	0.000688154	0.000161828	2754	tags=38%, list=12%, signal=33%	DLK1/CXCL10/KCNK5/RBP1/CXCL11/CXCR3/ADGRE1/SRPX2/IL7R/PTPN7/SPRY4/GDF5/IL2RG/C7/WNT2/SEMA3A/TMEM176A/P2RY6/RHOH/CYTIP/GPR3/CD247/HOXD3/GCNT1/TFEC/CD53/TACSTD2/ADRA1D/NFE2/NNAT/CHIT1/XPNPEP2/MECOM/CUBN/TRAF1
KRAS.LUNG_UP.V1_UP	KRAS.LUNG_UP.V1_UP	98	0.56723	1.65882	0.000309615	0.000718612	0.000168991	3927	tags=44%, list=18%, signal=36%	IL13RA2/NKX2-5/G0S2/BANK1/CD48/ADAMTS3/SH2D2A/PDCD1LG2/BCL2A1/HS3ST3A1/TMEM176B/JAK3/CCL20/CXCL8/ADA2/LILRB1/CYTIP/GPR3/ITGA2/CD247/HPN/ANGPTL4/HSD11B1/ASGR2/DOCK2/C3AR1/IKZF1/LAG3/NRP1/RNASE1/NDNF/CX3CR1/HBEGF/TSPAN1/MT3/ANO1/AURKC/TMEM158/SLC16A8/LDB3/DCBLD2/RREB1/EVI2A
BCAT_GDS748_DN	BCAT_GDS748_DN	44	0.664624	1.80032	0.000332825	0.000763061	0.000179443	3347	tags=30%, list=15%, signal=25%	TTR/COL2A1/IGHM/CELSR1/TENT5A/SLC27A6/HLX/RDH5/LAP3/PMFBP1/SNAI2/ISYNA1/GAS1
MEK_UP.V1_DN	MEK_UP.V1_DN	175	0.511022	1.54171	0.00036373	0.000823869	0.000193743	4207	tags=31%, list=19%, signal=26%	MGP/CSTA/OASL/COL9A3/ISG15/OAS2/OAS1/PLBD1/TFPI2/S100A8/AMIGO2/IFI6/BST2/SP100/MOCOS/OAS3/TM4SF1/IRF7/CASP8/IFI44/IFIH1/H3C10/ATF3/IFI44L/SEC24D/BLNK/MYLK/TAP1/IFI35/IFITM1/DLC1/H4C8/SNX10/TTC39A/SP110/SLC26A2/HERC6/AOPEP/H2AC11/ATP8B1/DDX60/MYB/H1-2/H2AC6/ITPRID2/IFI27/TFPI/QPRT/TRIM14/H2BC8/USP18/SAMHD1/IRF9/WIPF1/SHTN1
PRC2_SUZ12_UP.V1_UP	PRC2_SUZ12_UP.V1_UP	136	0.536691	1.60204	0.000390918	0.000871317	0.000204901	3920	tags=35%, list=18%, signal=29%	SERPINB2/PDE6A/ALDH1A3/CXCR3/CCL18/CD70/ALX4/PLEK2/NKX6-1/PINLYP/ECM2/COL13A1/KCNN4/DOK2/ARL4C/ACE/THNSL2/CTSS/CYP1B1/SEMA3E/ITGA2/SLC15A3/PTGIR/SLC13A3/LCP1/TNFRSF1B/GGT5/STAT5A/GIMAP4/PSMB8/BTN3A2/XPNPEP2/HBEGF/ST18/ERAP2/REST/COCH/CYP4F12/ALDH1A2/CLEC4E/ERMAP/FMNL1/GPC6/SLC6A9/DCBLD2/ETV4/CNPY4
LEF1_UP.V1_DN	LEF1_UP.V1_DN	147	0.520678	1.55669	0.000393946	0.000871317	0.000204901	4117	tags=35%, list=19%, signal=29%	PITX2/HOXB13/BDKRB2/PLAC8/TMPRSS3/PDZK1IP1/CRYBG1/DPP4/OAS1/GRB14/RAC2/IL20RA/RBM47/CCL20/MOCOS/OAS3/TM4SF1/CYP1B1/SEMA3F/OLR1/PROS1/SAMD9/IL18/MVP/GALNT12/PDGFRL/SLC22A18/TLR3/TMEM144/PLLP/MDFIC/HERC6/SELENBP1/FPGT/CNN3/EFNB2/TRPM4/TSPAN1/ERAP2/COCH/S100A14/EHF/PTPN13/PLOD2/KCNQ1/TSPAN8/SELENOP/BTN3A3/USP18/PF4/ACSF2/MXD3
PTEN_DN.V1_DN	PTEN_DN.V1_DN	136	0.535315	1.59793	0.000441807	0.00096581	0.000227122	3251	tags=32%, list=15%, signal=28%	CHI3L1/SERPINB2/EMP3/WNT16/CXCL11/CD3D/CXCR6/LUM/HLA-DRA/HLA-DRB1/FBXO17/HLA-DPB1/HLA-DPA1/ULBP1/TBX1/HLA-DQB1/MLANA/TPPP3/VIM/FOSL1/TWIST1/ADGRE5/HLA-DMA/RARRES1/ANKRD53/LILRA6/KRT14/CYP4F11/PSMB9/LCP1/FCN3/PYCARD/RFTN1/C1QTNF1/FST/CLDN10/HAAO/RLN2/FGR/ATP8B3/ABCA6/KCNMB3/ASIP/SLC5A4
KRAS.LUNG.BREAST_UP.V1_UP	KRAS.LUNG.BREAST_UP.V1_UP	90	0.582327	1.69009	0.000501904	0.00108457	0.000255051	2983	tags=42%, list=13%, signal=37%	MMP9/LIF/ESM1/IL13RA2/G0S2/STC1/SH2D2A/PDCD1LG2/ISG20/DNAH9/CCL20/CXCL8/IGFBP3/CXCL1/ADAM19/ITGA2/LILRA6/IL1R2/CD247/RMST/HPN/ANGPTL4/BIRC3/KCNK15/CD37/LAT2/HSD11B1/TNFAIP3/SPRY2/A2M/RNASE1/GLRX/PPBP/GYPC/TRAF1/SEMA3B/HBEGF/TSPAN1
MTOR_UP.V1_DN	MTOR_UP.V1_DN	154	0.516989	1.55068	0.000568957	0.0012155	0.00028584	4984	tags=38%, list=22%, signal=30%	HOXB5/AQP5/MOXD1/RBP1/DPEP1/C1R/NGFR/MFAP2/HLA-DQB1/OSMR/MYZAP/EFEMP2/PDGFA/PTGER4/C2/PRSS23/CXCL1/ICOSLG/OLFML3/S1PR3/TREM2/DDIT3/PDE6G/PPP1R14A/NCF4/MYH11/LTBP1/PDIA5/PDLIM3/AOC3/SH3BGR/GDPD2/IFITM1/FBXO32/SIX5/DTX2/FAH/SULT2B1/PI16/KCNQ1/QPRT/PLTP/PALD1/DUSP1/KRT5/NFIL3/FANK1/TSPAN4/TGIF2/HSPA1A/FXYD1/METTL27/B3GALNT2/P3H4/SCARA3/SNHG11/IRS2/ITIH5/THBS3
ESC_J1_UP_LATE.V1_DN	ESC_J1_UP_LATE.V1_DN	140	0.517044	1.5439	0.000839783	0.00177392	0.00041716	4798	tags=34%, list=22%, signal=27%	TRH/GLI1/PHLDA2/NGFR/TCEA3/NIBAN1/SOCS3/LCK/SPRY4/SOCS2/CAVIN1/MMP11/SFN/PCOLCE/EVC/DAPP1/ICAM1/ITGB7/E2F8/ANGPTL4/HELB/HCK/BCL3/GAP43/SLC1A5/ERCC6L/PPCS/DLC1/NNAT/CORO1A/AOAH/ACACB/VEGFC/GLI2/BHLHE40/ETV4/EGR1/TCF15/TLE4/RPP25/PCOLCE2/PASK/SNTB2/SLC4A3/MORC1/TAF13/LMNB2/GYS1
STK33_NOMO_DN	STK33_NOMO_DN	234	0.482166	1.46346	0.000931484	0.00194577	0.000457571	4226	tags=27%, list=19%, signal=22%	HOXD13/DSG2/PTGER2/HOXA10/CLEC5A/F13A1/GZMA/CRYBG1/LCK/FPR2/SOCS2/XAF1/CCR7/HK3/LAMP3/GJB2/APOBEC3C/ST14/ACP3/ALOX5/SLC47A1/CYP4F3/PROK2/BACE2/ITGB7/TSPAN2/PRAM1/GCH1/FBLN7/PADI2/SHISA2/SIRPB2/SLC16A4/GALNT12/LPCAT2/PSTPIP2/PAWR/PDGFRL/ZDHHC23/ART3/TMTC2/PLXND1/MATN2/ANPEP/FCGR3B/STX11/MAP4K1/GPAT2/FAM241A/SLC40A1/HNF4G/MTFR2/RMI2/PALD1/C16orf74/HCG11/BTN3A3/VAT1/LRRK2/ASL/SEMA3C/ADGRA2/HPDL/MAP3…
NFE2L2.V2	NFE2L2.V2	317	0.456052	1.39037	0.00109529	0.0022628	0.000532126	3974	tags=31%, list=18%, signal=25%	TNFRSF11B/F2RL2/ALDH3A1/CFI/HGD/CSTA/HLA-DOA/GPNMB/MMP7/SPP1/C1S/KIAA0040/IQGAP2/AKR1B10/HLA-DQB1/TPPP3/BCAT1/RAB42/IL10/UBXN10/CD101/ECM2/SFN/P2RY6/KCNE4/LCN2/HMOX1/IGFBP3/SLC47A1/CYP4F3/RDM1/LILRA5/CBR1/SPN/FGL1/OSCAR/PNPLA4/SHISA2/ACP7/HPN/HJURP/RRM2/NEIL3/CYP4F11/HLA-DOB/HTATIP2/SLC2A9/FTL/FTLP2/CDC45/NCF2/ODF3L1/TDO2/PDE6B/NQO1/NINJ2/ZC3H12D/SLC5A11/SYK/MDFIC/MOG/PLXND1/BRIP1/GRPR/TP73/BCAS1…
P53_DN.V2_UP	P53_DN.V2_UP	95	0.551759	1.6079	0.00112522	0.00229937	0.000540724	3221	tags=42%, list=14%, signal=36%	CXCL6/CA3/ADAM12/CLCF1/PTX3/MMP3/INSL3/CD69/XAF1/FPR3/IL1RN/ALOX5AP/CCL20/P2RY6/CXCL8/SDC4/CXCL1/CTLA4/CD5L/ANGPTL4/MPZ/SLC16A4/KRT14/FOSL2/NCKAP1L/INPP5D/LRRC32/SLA/POU2AF1/TNFAIP3/IER3/SARDH/IKZF1/MOG/RELB/CDH4/APOL3/KCNMB1/CYP2C8/CXCL12
ESC_J1_UP_EARLY.V1_UP	ESC_J1_UP_EARLY.V1_UP	142	0.509761	1.52252	0.001239	0.00250465	0.000588999	3751	tags=28%, list=17%, signal=24%	TTR/PDPN/GZMA/TFF3/STC1/TYMP/IL15/PTGER4/FOSL1/FGFRL1/LOXL2/NCF1/ASCL2/ADM/ADTRP/CPPED1/MAG/CYP2S1/ZIC2/NEK2/P4HA2/CD33/A4GALT/CUBN/CARD19/ADSS1/NAGA/TSPAN1/MYB/CXCL12/HIVEP3/SLC8B1/AQP3/DBNDD2/TMEM106C/GADD45B/SHFL/NAAA/PRXL2C/SIL1
HINATA_NFKB_IMMU_INF	HINATA_NFKB_IMMU_INF	13	0.805628	1.74778	0.00129576	0.00259152	0.000609429	2883	tags=69%, list=13%, signal=60%	CXCL6/IL6/PTX3/CXCL8/IRF1/ICAM1/OLR1/TNFAIP2/IL1B
CTIP_DN.V1_UP	CTIP_DN.V1_UP	84	0.560222	1.62517	0.00144316	0.00285594	0.000671611	3261	tags=33%, list=15%, signal=29%	TTR/BARX1/COL1A2/CXCR6/CHODL/SNAI1/LAIR2/IFI6/CCL20/CXCL8/CTLA4/ALPK3/SLC16A4/CD22/DDIT3/LGALS9/PNMT/PDGFRL/PMEL/SP140/OLFML2B/COPZ2/ADAMTS2/GRPR/TRAF1/S100A1/COCH/CYSLTR1
CYCLIN_D1_KE_.V1_UP	CYCLIN_D1_KE_.V1_UP	157	0.498549	1.49503	0.00155259	0.0030405	0.00071501	5551	tags=41%, list=25%, signal=31%	SLN/GLI1/COL5A2/BATF/RUNX1/HSPG2/CD52/HK3/CCL20/LCN2/EPHA2/LTBR/AHR/THBD/RASSF7/DUSP5/S100A2/ADRA2B/PLK3/FOSL2/COL18A1/RGS3/NFE2/CEBPD/ZYX/GGT5/PTPRH/PLCB2/TROAP/KLK6/IFITM1/APOC1/FZD5/TGFBR2/CDK6/TRAF1/PLOD1/KIFC1/CDR2/CASP3/RRAS/DAP/CHRNA5/DUSP4/CDR2L/HSPA1B/COX7A1/GLB1/CDKN2A/SLC35D1/POLD1/ZIC1/CDKN1A/ADRA2A/ST3GAL4/SMTN/CDS1/PPIB/DNASE2/CENPB/ALDH3A2/STT3A/GNAI2/TRIO
CRX_DN.V1_UP	CRX_DN.V1_UP	108	0.529998	1.56631	0.00165367	0.00320505	0.000753706	5521	tags=48%, list=25%, signal=36%	ABCA4/PDE6A/CCN4/AQP1/STRA6/DNAI4/PLA2R1/CABP4/BATF2/HCLS1/BUB1B/ZDHHC12/JAG1/SP6/RDH5/PLPP2/INSL5/BST1/PDIA5/MYLK/MYRF/ZFP57/GPSM3/LLGL2/TNFAIP3/NAT1/IER3/DOCK8/SELENBP1/ESRRB/CLDN7/NRM/B4GALT1/CDR2/RAD51/C16orf74/HSPA1B/KLKB1/PFKFB2/SNTB2/HSPA1A/PPP1R42/DUSP14/TMEM229B/UBXN11/GRTP1/DOHH/PAQR4/RDH12/SNTA1/GZMM/PTPN21
IL15_UP.V1_DN	IL15_UP.V1_DN	122	0.515901	1.52839	0.00169644	0.0032544	0.000765313	4240	tags=39%, list=19%, signal=32%	HOXD13/SERPINA5/IGLV2-14/NKX2-5/ADAM12/MMP19/SLN/CCR2/S100A3/OSR2/RNASE2/CYB5R2/ARL4C/SPAG4/FZD2/CLEC2B/WNT4/DOK3/DNAI2/PROM1/CD72/CLDN11/VWF/TNFAIP2/MYLK/GNAT2/TGFB1I1/MTARC2/ADAMTS2/CHIT1/RLN2/FAM124B/ADGRL4/SNAI2/FSTL3/ATP10B/KCNQ1/EFNA1/TNFRSF11A/GEM/TRPM6/ABCD2/SEPTIN10/ETV2/EVI2A/PBXIP1/IRAG2/EPS8
PRC1_BMI_UP.V1_UP	PRC1_BMI_UP.V1_UP	138	0.501919	1.4977	0.00183892	0.00349209	0.000821209	3867	tags=32%, list=17%, signal=27%	IDO1/PRND/PDE6A/CXCL10/DPEP1/CCL18/GALNT3/SERPINA3/PTPN7/PLEK2/RGS16/SH2D2A/PINLYP/CD5/FPR3/HSPB7/COL13A1/COLEC11/CXCL8/CD5L/ARL4C/ACE/THNSL2/CCL8/BIRC3/ABCB4/TNFAIP3/BHMT2/MMP25/CLDN3/ADAP2/CDK6/XPNPEP2/IRF8/ERAP2/DKK2/EOGT/PLEKHF1/EGR2/CLEC4E/ERMAP/RREB1/SIM2/ACKR2
PGF_UP.V1_DN	PGF_UP.V1_DN	143	0.507247	1.51596	0.00200344	0.00376646	0.00088573	2757	tags=27%, list=12%, signal=24%	GATA4/IGHA2/PDE6A/IGFBP2/PAX2/PDPN/LOXL1/SERPINA3/VGF/S100A4/CTSW/SPRY1/CD5/ALOX5AP/KCNN4/SDC4/ENTPD2/SPN/CTF1/MYO1F/CDC20/CDKN2C/IGFBP5/CEBPA/COL18A1/ITGB4/MYL9/TNFAIP3/PTPRH/TROAP/DLEC1/APOC1/ENPP2/GYPC/IGFBP6/RELB/AK4/NFASC/ARC
BCAT.100_UP.V1_DN	BCAT.100_UP.V1_DN	29	0.694315	1.76214	0.00202851	0.00377584	0.000887935	1587	tags=21%, list=7%, signal=19%	TTR/IGHM/DEPP1/KLHL4/TENT5A/IGFBP5
PRC2_EED_DN.V1_UP	PRC2_EED_DN.V1_UP	153	0.49556	1.48496	0.00211364	0.00389572	0.000916128	3676	tags=27%, list=17%, signal=23%	HOXC8/HOXA2/SERPINB2/CXCL10/IL13RA2/GALNT3/MAP3K7CL/NIBAN1/AKR1B10/PTPN7/GDF5/PDGFA/CD5/FPR3/RBM47/IFI6/LY96/DEPP1/ARL4C/THNSL2/LXN/GPR37/SLC28A1/PLAG1/ANGPTL4/MS4A4A/ATF3/KLK6/ENPP2/FUCA1/H2BC4/CUBN/IRF8/ADGRL4/DKK2/H1-2/H2AC6/SLC35D2/CD244/TNFRSF11A/ERMAP/TRIB1
TGFB_UP.V1_DN	TGFB_UP.V1_DN	154	0.495687	1.48679	0.00233573	0.00426327	0.00100256	3417	tags=27%, list=15%, signal=23%	EYA4/VAV3/COL4A1/BDKRB2/PTX3/OSR2/GATA3/IRX5/MAP3K19/SPRY1/PTGER4/HSPG2/RAB38/RBM47/IRF1/CXCL1/SCGB1D2/CLEC2B/ADAMTS1/KIF18A/THBD/GCH1/ANGPTL4/BIRC3/NR2F2/DUSP6/FCN3/FRMD4B/FNDC3B/FHL3/SPRY2/IRF5/TLR5/TBX19/TRPM4/MITF/FSTL3/SH3TC2/EHF/PLEKHF1/MIR22HG
CYCLIN_D1_UP.V1_DN	CYCLIN_D1_UP.V1_DN	143	0.50305	1.50342	0.00241535	0.0043662	0.00102677	3317	tags=27%, list=15%, signal=23%	GATA4/PLA2G2A/NKX2-5/TRH/CPA3/S100A4/HLA-DRA/KIAA0040/IL7R/RGS16/CAPG/LAMB1/ITGA3/CAV1/GCK/ALOX5/MYO1F/UCP2/CD19/IL1A/GAL/ACAA2/NCKAP1L/HRH1/MYL9/LILRB4/RNASE6/EPHA1/ASGR2/BRCA2/CXCR4/IFNGR2/HPS1/VASP/GNS/CUL7/MYO1C/SULT2B1
AKT_UP.V1_DN	AKT_UP.V1_DN	158	0.49093	1.47139	0.00259733	0.00465045	0.00109361	4985	tags=39%, list=22%, signal=30%	IBSP/AQP5/PDLIM4/C1R/CD248/ITGBL1/C1S/CHAD/PLEK2/EFEMP2/TCAF2/KCNN4/MOCOS/ISLR/CAV2/FAM20C/S1PR3/PROM1/FAS/ANGPTL4/OGN/PDIA5/PDLIM3/EFEMP1/IL13RA1/STAT5A/TNFRSF19/SH3BGR/FBXO32/MATN2/PLA2G4A/IL17RC/SLCO3A1/SIX5/HPS1/FAH/SERPINF2/HEBP1/HIC1/TP53I13/GAS1/GNA14/PI16/CNN2/ITPKB/PLTP/KRT5/FANK1/TSPAN4/FUT8/FXYD1/NID1/ID3/SLC39A4/SCARA3/BLVRB/IRS2/IFFO1/ITIH5/KCTD12/PAQR7
RB_P130_DN.V1_UP	RB_P130_DN.V1_UP	107	0.519121	1.53384	0.00267519	0.00474468	0.00111577	5536	tags=43%, list=25%, signal=32%	AQP5/SLC11A1/RGS16/SLC43A3/FGF10/TWIST2/ATP2A3/KIF20A/CYBA/RHOJ/CMTM7/RIPK3/TK1/MYLK/BIRC5/IER3/FST/LITAF/CASP7/RENBP/PIMREG/AURKA/RSPH9/CARD19/CCNB2/UBE2C/AURKB/PCSK5/ORC1/CDK1/SPATA13/SIM2/NKX2-8/SDF2L1/PF4/SLC29A1/SULT1B1/ATP2A1/WNT2B/SLC7A9/GRTP1/CHCHD7/PDZK1/SNTA1/B4GALT4/ERG
CTIP_DN.V1_DN	CTIP_DN.V1_DN	103	0.530128	1.55908	0.00271871	0.00477679	0.00112332	4318	tags=41%, list=19%, signal=33%	PLA2G2A/WNT16/ALX4/INSL3/MAOB/TFCP2L1/CASP5/IL1RN/CD7/RUNX3/CITED1/GZMB/PTGS1/CYP4F3/LAIR1/CTF1/OLFML2A/PTGIR/TREM2/TFEC/HLA-DOB/CD53/PI15/ABCB4/TENT5C/LRRC32/CNTF/IQCG/BCAM/RNF125/ANO1/CLMN/EPB41L4A-DT/CYBRD1/CYP4F12/CA14/GSN-AS1/SERPINB9/SLC35D1/COQ8B/MYOT/SYNDIG1
PRC2_EZH2_UP.V1_UP	PRC2_EZH2_UP.V1_UP	158	0.488861	1.46519	0.00274681	0.00478149	0.00112443	3973	tags=37%, list=18%, signal=31%	SERPINB2/ESM1/ALDH1A3/IL13RA2/TNFAIP6/SRPX2/CD70/RGS16/PDGFA/FPR3/COL13A1/HS3ST3A1/SEMA3A/KYNU/ASPN/CXCL8/ARL4C/PAMR1/CDCP1/CLEC2B/ITGA2/IFI44/GPR37/ANGPTL4/EPHB2/FZD1/CARD9/ART3/BHMT2/IL15RA/TBXAS1/TOR4A/CCNJL/ANPEP/F2RL1/TMC7/MAN2A1/HBEGF/CROT/IRF8/JUP/ADGRL4/ERAP2/PTHLH/DKK2/PIR/IL6R/COL4A5/SLC35D2/ALDH1A2/CLEC4E/COL4A6/SLC16A8/ST6GAL1/TRIB1/DCBLD2/ETV4/AHNAK2/B3GALT4
CSR_LATE_UP.V1_UP	CSR_LATE_UP.V1_UP	144	0.500718	1.49561	0.00290803	0.00501569	0.0011795	5124	tags=36%, list=23%, signal=28%	CXCL6/TIMP1/MET/MMP3/KRT18/IL7R/IGFBP3/SLC16A3/MT1L/LTBP2/MYBL2/RRM2/SHCBP1/SLC16A5/CDCA8/CLSPN/BIRC5/FAM83D/CDC6/CHEK2/MT1H/UBE2C/PBK/TCF19/NUF2/VEGFC/CXCL12/BHLHE40/CDK1/TRIP13/SMS/PGM2/ARHGEF1/ANLN/ZNF367/AP1S2/MT2A/DTYMK/ZWILCH/POLD1/FOXM1/ST3GAL4/LMNB2/DNAJB11/GYS1/ITGA6/TPM2/MCM3/ACTL6A/NDC1/FANCA/MT1G
PRC2_EZH2_UP.V1_DN	PRC2_EZH2_UP.V1_DN	148	0.496007	1.48279	0.00308626	0.00527471	0.00124041	4723	tags=42%, list=21%, signal=33%	BARX1/HOXA10/PITX1/CCL18/LRRC61/PSRC1/HMOX1/DEPDC1/DLGAP5/MYBL2/SULF1/HJURP/KIF4A/RDH5/FOSL2/ACTC1/CDC45/FCN3/LRRC32/CENPU/OLFML2B/NFE2/DEF6/FKBP5/CENPF/BUB1/GJC2/OXTR/CORO1A/AURKB/TRPM4/TTK/TACC3/GNA15/MIS18BP1/CEBPE/PCK2/CXCL12/RAD54L/NCAPH/ECT2/HMMR/GAS1/OIP5/MCM2/LMNB1/DDB2/MEFV/MXD3/HAS2/RHPN1-AS1/COQ8B/EPHX2/MPIG6B/KNTC1/THBS2/FUT7/INHBB/PSPH/NPR3/KIF15/HAUS5
CSR_EARLY_UP.V1_UP	CSR_EARLY_UP.V1_UP	123	0.511879	1.51699	0.00348499	0.00590251	0.00138805	7009	tags=46%, list=32%, signal=32%	DDIT4L/TNFRSF12A/STC1/SPRY4/SNAI1/PLAUR/F3/CD274/SLC28A1/HLX/GAL/EHD4/ELK3/DLX2/MAP2K3/SPRY2/CD33/FOXD1/ITPRIPL2/CEMIP2/HBEGF/FZD8/REST/MYO9B/DSP/KLF10/C21orf91/TLNRD1/ID3/HMGA1/SOX9/ST3GAL1/SLC16A1/TXNDC12/ACTR3/PNP/SMTN/PXN/IRAK1/GNL2/PTPN12/CBFB/UAP1/AMD1/EMC6/TBX2/UGDH/ADRM1/PTPN1/NUP54/C8orf76/PHLDB1/NIP7/SLC30A1/DCBLD1/PUM3/MOB1B
PRC2_EED_DN.V1_DN	PRC2_EED_DN.V1_DN	163	0.486444	1.45799	0.00439409	0.00737579	0.00173451	3730	tags=28%, list=17%, signal=24%	PTGER2/CCL18/GLI1/FBXO17/PDCD1LG2/PRICKLE3/HMOX1/GSDMD/MICALL2/TCIRG1/MYBL2/BUB1B/KIF4A/KIF23/ACAA2/RDH5/FOSL2/ASF1B/CDC45/CDCA8/FKBP5/CLSPN/STXBP2/CDK18/MAP3K6/CHAF1B/TNFRSF10D/SIPA1/CORO1A/SEMA3B/PLAAT3/PACSIN3/JUP/TRPM4/FZD8/TACC3/ORC1/TGFBR1/CXCL12/HIC1/HIVEP3/RAD54L/ITPKB/MCM2/PCDH12/PLK1
PRC1_BMI_UP.V1_DN	PRC1_BMI_UP.V1_DN	120	0.506667	1.5018	0.00473273	0.00787393	0.00185165	4675	tags=44%, list=21%, signal=35%	BARX1/HOXA10/CCL18/CXCR6/CIITA/FBXO17/FOXJ1/HLA-DPB1/APOBEC3F/LRRC36/ADAMTS7/CYP27A1/LAMC3/SPINT1/ARSD/FZD10/ATP2A3/ITGA7/SLC27A3/GVINP1/RDH5/FES/PSD4/PYCARD/FKBP5/GPR183/CLSPN/SLC66A3/TBXAS1/FGFR3/GJC2/HAPLN2/CORO1A/CLIC3/PACSIN3/TRPM4/GNA15/GAS1/PILRA/GFAP/AANAT/QPRT/PDGFB/C22orf31/NACAD/PLA1A/COQ8B/EPHX2/CA5A/MTHFS/FBXL8/LIPE/PRRG2
RAF_UP.V1_DN	RAF_UP.V1_DN	167	0.469945	1.41545	0.00490995	0.00809711	0.00190414	3219	tags=23%, list=14%, signal=20%	IGFBP2/VAV3/DKK1/TFF3/TGFB2/OSR2/SERPINA3/MGP/CSTA/TMPRSS3/IRX5/CRYBG1/COL9A3/KYNU/CAV1/TM4SF1/MICB/IGFBP5/MDK/PDGFRL/IGFBP4/MYLK/PMP22/MYO1B/DLC1/H4C8/TTC39A/SELENBP1/AOPEP/AK4/ELOVL2/CLIC3/EFNB2/SLC39A8/SCUBE2/MYB/PALLD/S100A14
PTEN_DN.V2_DN	PTEN_DN.V2_DN	107	0.504281	1.48999	0.00522427	0.00854055	0.00200841	4205	tags=33%, list=19%, signal=27%	HOXB13/LOXL1/RIBC2/MT1M/SERPINH1/ST6GALNAC2/MRC2/TMEM176A/TGFBI/BATF3/CLEC7A/GPR3/SPHK1/HCLS1/PLAG1/CEBPA/FES/APBB1IP/DLX2/FGFR3/COPZ2/TRPM4/ATF5/HIVEP3/NIPAL3/NOS3/FCAR/SELENOP/H4C5/GPRC5C/MAFK/TBX3/MXD3/BARD1/WIPF1
ERBB2_UP.V1_DN	ERBB2_UP.V1_DN	178	0.477809	1.444	0.00556218	0.00901457	0.00211989	4255	tags=27%, list=19%, signal=22%	MGP/COL9A3/OAS2/OAS1/FOLR1/TFPI2/AMIGO2/LAMB1/IFI6/BST2/CAV1/DEPDC1/CENPE/TM4SF1/IRF7/IFI44/IFIH1/IFI44L/CASP6/DLC1/TTC39A/MATN2/NCAPG/SLC26A2/HERC6/AOPEP/CLIC3/ATP8B1/DDX60/ARHGAP29/TTK/RAD54B/RBBP8/STIL/MYB/DTL/ITPRID2/ECT2/IFI27/PLK4/STK17A/ADAM9/HS2ST1/BTG3/RAD51AP1/WIPF1/KLF10/TMED5
GCNP_SHH_UP_LATE.V1_DN	GCNP_SHH_UP_LATE.V1_DN	151	0.482607	1.44473	0.00605875	0.00973544	0.00228941	4154	tags=32%, list=19%, signal=26%	TUBA4B/RAB34/PDZK1IP1/SLC11A1/S100A11/ENPP1/PTGER4/HSPG2/CD52/FRRS1/SERPINF1/CDCP1/GPR3/VNN1/ITGA7/SLC25A45/NMI/S100A13/CNN1/H2AJ/CD276/KLK6/PSMB8/FAM111A/EPHA3/IL4R/TBC1D1/COX6A2/SAT1/NBEAL2/AGTRAP/FOXD3/STX3/DOK1/PPM1M/VEGFC/EBI3/GLA/FCGRT/ACTN4/CNN2/MAN2B1/LGALS2/TGFB3/SOX18/PTPN18/WLS/IRF9
PTEN_DN.V1_UP	PTEN_DN.V1_UP	129	0.488615	1.45373	0.00638563	0.0101737	0.00239248	4302	tags=34%, list=19%, signal=28%	HOXC8/PAX3/HOXB2/HS3ST3B1/SIT1/AQP1/COL15A1/RSAD2/MX2/ALOX5AP/C2/ASPN/ACSS3/CYB5R2/LAMC3/FCER1G/ITGB2/TSPAN2/CYP39A1/CPVL/JAG1/HOXD1/TENT5C/PRR16/MSC/RTP4/MAL/GJC2/MTARC2/PLCE1/NFASC/FGF1/VCAM1/NTNG1/SLC26A4/CD27/SELENOP/JAM3/EVI2A/MEFV/IRF9/MMRN2/CCNP/MYOT
KRAS.AMP.LUNG_UP.V1_DN	KRAS.AMP.LUNG_UP.V1_DN	102	0.509755	1.49766	0.00661739	0.0103672	0.00243799	4117	tags=36%, list=19%, signal=30%	HOXC8/IGF2-AS/PODNL1/ADGRE1/FCGR2B/EMILIN2/ENPP1/PDCD1/LILRA4/ACE/CTF1/FGL2/PROM1/GVINP1/HTR1D/CD300A/NAT2/INPP5D/PTPRH/H2AJ/P2RX1/TBXAS1/H2BC11/RELB/SLC6A16/CXCR2/PRODH/ZC2HC1C/ALDH1A2/CD34/USP53/HDAC7/ABCD1/ST20/GPRC5C/SCARF1/MXD3
KRAS.600_UP.V1_UP	KRAS.600_UP.V1_UP	206	0.461745	1.39848	0.00659418	0.0103672	0.00243799	4141	tags=38%, list=19%, signal=31%	IGF2/MMP9/PLEKHS1/CYP27B1/ESM1/HS3ST3B1/IL13RA2/G0S2/PLAU/PLAT/STC1/PTX3/ITGBL1/SPP1/SH2D2A/TLR8/RUBCNL/EN2/MMP11/APOBEC3G/SEMA3A/ADAM19/ARL4C/ITGB2/EMP1/ITGA2/LILRA6/IL1R2/LPAR1/GPR37/HPN/ANGPTL4/LAPTM5/RDH5/DUSP6/HSD11B1/C1QTNF1/APOD/SPRY2/LAG3/NRP1/A2M/CCNJL/RNASE1/CXCR4/GLRX/ANPEP/CLUL1/PPBP/CPA2/HBEGF/ST18/TMEM156/SRGN/FLT4/MAP4K1/ANO1/VEGFC/MLXIPL/AURKC/TMEM158/MOBP/GPR4/TFPI/GFAP/CSF2RA/TG…
PKCA_DN.V1_UP	PKCA_DN.V1_UP	111	0.504409	1.48775	0.00693052	0.0107681	0.00253225	3738	tags=32%, list=17%, signal=27%	GATA4/HOXB4/TYMP/OAS2/SECTM1/IL15/FBP1/CES1/VWA1/OAS3/PIPOX/SLC16A3/CA2/CYP11A1/SLC47A1/FBLN1/SHISA2/GALNT6/CASP6/SP6/RDH5/HLA-E/GDPD2/RNASE1/CD36/DDX60/SLC2A5/GLI2/DBNDD1/PLEKHF1/ALOX12P2/MGMT/GFAP/KIRREL1/CDR2/DLX1
SIRNA_EIF4GI_DN	SIRNA_EIF4GI_DN	87	0.530047	1.53726	0.0070873	0.0109214	0.00256831	3977	tags=29%, list=18%, signal=24%	IGF2BP2/HLA-DPA1/FSTL1/MAP3K19/SLC43A3/LOXL2/CCL2/CYTL1/SP140L/CDKN2C/SHCBP1/MYD88/HSD11B1/C1QTNF1/PMP22/CDC6/SNX10/FAM111A/PBX3/TMEM156/CDH11/TRIP13/CDR2/DUSP4/CENPS
RB_P107_DN.V1_DN	RB_P107_DN.V1_DN	108	0.499073	1.47492	0.0074436	0.0113772	0.00267549	5029	tags=28%, list=23%, signal=22%	PRND/ANXA1/S100A9/S100A8/GJB2/GNG12/ACP5/TLR2/MBNL3/NMI/PLK3/ELOVL1/CRABP2/SYTL1/GLRX/H2BC4/MYO1D/PPBP/S100A16/STAT6/CXCL12/CHAC1/CTSL/LACTB2/ANXA4/PTPN9/CAP1/PMM2/NFE2L2/PLEKHA7
RELA_DN.V1_UP	RELA_DN.V1_UP	110	0.504139	1.48739	0.0079268	0.0120181	0.00282619	4450	tags=37%, list=20%, signal=30%	NTS/ESM1/VDR/SNAI1/FOSL1/F3/TNC/DAPP1/CCL2/VEGFA/DEPP1/SIRPB1/CTF1/MAK/THBD/SLC27A6/MTMR11/TRIM38/ATF3/SAMSN1/GJB1/ZFP36/GPR183/ULBP2/GRAP/JUNB/DYSF/IL1B/JUN/BCO1/KLF6/EFNA1/GADD45B/PPP1R15A/RREB1/EGR1/RIPK1/KLF10/LGMN/FOS/ATP2A1
BCAT.100_UP.V1_UP	BCAT.100_UP.V1_UP	40	0.600915	1.61184	0.00816147	0.0122748	0.00288658	4824	tags=55%, list=22%, signal=43%	HOXA1/RBP1/DKK1/CHODL/RUNX1/CAVIN1/SASH3/ARHGEF5/LMO2/GCNT1/DUSP6/EFEMP1/FGF20/ENPP2/DBNDD1/PLEKHF1/DUSP4/TBX3/QPCT/SLC7A8/CD9/DNAJC3
STK33_DN	STK33_DN	237	0.43941	1.33432	0.00876084	0.0130717	0.00307398	5730	tags=35%, list=26%, signal=27%	DSG2/SERPINB2/HOXA10/F13A1/GZMA/CCL5/TNFAIP8/CRYBG1/LCK/RGS16/HK3/DNAAF3/LAMP3/GJB2/ALOX5/CYP4F3/PROK2/BACE2/TSPAN2/PRAM1/FBLN7/PADI2/SHISA2/GALNT12/NR2F2/LPCAT2/PSTPIP2/PAWR/PDGFRL/TENT5C/TNFSF10/NFE2/ZDHHC23/MREG/ART3/SYTL1/PLXND1/MATN2/ANPEP/MTARC2/CAST/STX11/MAP4K1/GPAT2/FAM241A/VCL/JPT2/ENDOD1/CCDC125/MTFR2/SPNS3/RMI2/PALD1/CDC42EP3/C16orf74/BTN3A3/PODXL/LRRK2/ASL/HPDL/MAP3K15/POLD1/PSPH/ABH…
DCA_UP.V1_UP	DCA_UP.V1_UP	123	0.490343	1.45317	0.00996879	0.0147569	0.00347028	3968	tags=30%, list=18%, signal=25%	IGLV2-14/WNT16/IL2RA/CCN4/CD70/SERPING1/CACNG5/SERPINA1/INSL3/MX1/WNT2/ANKRD53/CXCL8/DEPP1/ACP5/ADAM19/CLEC7A/LAMC3/SLC28A1/PNMT/MDK/CDC45/KLRB1/AIF1/SARDH/SLC66A3/COPZ2/EYA2/CUBN/AURKB/RNF125/CREB5/CD27/BTN3A1/MYOZ3/COBL/C22orf31
BCAT_GDS748_UP	BCAT_GDS748_UP	39	0.577709	1.54507	0.014236	0.0209091	0.00491704	3663	tags=49%, list=16%, signal=41%	PHLDA2/CRYBG1/RUNX1/CA2/GCH1/LMO2/GCNT1/FGF20/COTL1/HHEX/AOPEP/FAH/CEBPB/LEF1/FLT4/MYB/AQP3/TP53I3/FZD7
EGFR_UP.V1_DN	EGFR_UP.V1_DN	175	0.451586	1.3624	0.0150808	0.0219782	0.00516843	3397	tags=25%, list=15%, signal=21%	BDKRB2/OSR2/CSTA/TMPRSS3/COL9A3/IFI6/BST2/CAV1/MOCOS/DEPDC1/E2F8/IFI44/MICB/CYBA/SLC27A3/H3C10/IFI44L/CASP6/MDK/LTBP1/CENPU/PDLIM3/LLGL2/DLC1/H4C8/TTC39A/MATN2/BRIP1/HERC6/AOPEP/H2AC11/ELOVL2/DDX60/EFNB2/SLC39A8/HEBP1/STIL/MYB/DTL/H1-2/H2AC6/ITPRID2/IFI27
ATM_DN.V1_DN	ATM_DN.V1_DN	91	0.495673	1.44047	0.0161479	0.023174	0.00544966	2714	tags=26%, list=12%, signal=23%	RASSF9/HS3ST3B1/GPR65/RNASE2/CD69/CFH/WNT2/SEMA3A/DNAH9/ARSF/CSF2RB/CD14/TFEC/LILRA2/TLR7/PI15/ITGB4/PMEL/CYBB/MAG/EPHA1/NNAT/HAAO/TAGLN
CRX_NRL_DN.V1_UP	CRX_NRL_DN.V1_UP	115	0.475967	1.40793	0.0161251	0.023174	0.00544966	5835	tags=50%, list=26%, signal=37%	PDE6A/CCN4/TFF3/AQP1/PCOLCE/KCNN4/PLA2R1/CABP4/SLC16A3/WWTR1/GADD45A/HCLS1/BUB1B/ZDHHC12/CDKN2C/PLPP2/BST1/LRRC2/PDIA5/MEST/LLGL2/TNFAIP3/IER3/SYTL1/MYO7A/ESRRB/ZFP36L2/NRM/PIP4K2C/PROSER2/EPS8L1/B4GALT1/GFAP/CDR2/DIAPH3/MLF1/HSPA1B/PTPN18/GALNT10/SNTB2/HSPA1A/PPP1R42/ST3GAL1/UBXN11/PDE8A/GRTP1/SEC14L2/DOHH/CRYBB1/PAQR4/RDH12/SNTA1/SSBP4/BBS9/SLC24A1/RFX2/DHRS3
STK33_SKM_DN	STK33_SKM_DN	230	0.436463	1.32392	0.0163879	0.0233403	0.00548876	4753	tags=32%, list=21%, signal=26%	SERPINB2/DDIT4L/CD3D/CCR2/CCL5/TNFAIP8/BANK1/CRYBG1/RGS16/TEAD4/SPRY1/THBS4/DNAAF3/GRB14/RAB38/GPR84/FBLIM1/MOCOS/ALOX5/CYP4F3/PROK2/BACE2/PADI2/SHISA2/GPR37/SERPINB8/GALNT12/LILRA2/NR2F2/PAWR/PDGFRL/TENT5C/TNFSF10/PYROXD2/NFE2/ZDHHC23/ZFP57/STING1/MREG/TMEM144/PROCR/MYO1B/CALD1/ANPEP/MTARC2/CPED1/CAST/SYNJ2/FAM241A/VCL/GPX7/STBD1/CCDC125/TMEM273/CXCL16/SPNS3/BICD1/CDC42EP3/PODXL/YDJC/LRRK2/ASL/T…
ESC_V6.5_UP_EARLY.V1_UP	ESC_V6.5_UP_EARLY.V1_UP	130	0.463056	1.37944	0.0175354	0.0247869	0.00582895	3285	tags=23%, list=15%, signal=20%	LTF/DRC1/F13A1/RUNX1/RYR3/FBP1/SLC16A3/MBOAT1/CYP27A1/ADAMTSL4/GPD1/MARCHF9/SPEF1/TMCO4/PSMB9/ENG/TNFRSF1B/ECE1/SLC5A11/PMFBP1/ENPP2/DLC1/CGNL1/EFNB2/ARHGEF16/LEF1/MYB/HIVEP3/ARHGAP27/TMEM158
KRAS.50_UP.V1_DN	KRAS.50_UP.V1_DN	24	0.624497	1.54751	0.0243042	0.0340984	0.00801866	2064	tags=42%, list=9%, signal=38%	IGF2-AS/PSORS1C1/KRT16/MX2/PLBD1/S100A7/OLFML2A/IFI44L/RRAD/CRYGD
RPS14_DN.V1_DN	RPS14_DN.V1_DN	159	0.454146	1.36159	0.0259165	0.0360911	0.00848728	4728	tags=35%, list=21%, signal=28%	CA3/STEAP3/S100A3/BCAT1/PCOLCE/NID2/COLEC11/DEPDC1/CENPE/SPHK1/E2F8/DLGAP5/CDC20/MYBL2/KIF20A/EXO1/KIF23/GAL/DYRK3/IL7/TK1/ENG/KIF2C/ERCC6L/IL15RA/ESPL1/CDC6/FZD5/ARHGAP11A/CNN3/CCNB2/PBK/EMP2/ZC2HC1C/KANK2/SH3TC2/ORC1/CYBRD1/NCAPH/ECT2/ACKR1/TRIP13/TGM2/CDR2/SHMT1/PLK1/CHAC1/MCM5/GINS2/SLC29A1/MKI67/ZWILCH/COBLL1/POLD1/KIF15/MIPEP
CYCLIN_D1_KE_.V1_DN	CYCLIN_D1_KE_.V1_DN	131	0.473746	1.41089	0.0270165	0.0373463	0.00878245	5061	tags=39%, list=23%, signal=30%	COL3A1/CPA3/PTCRA/KIAA0040/IL7R/MX1/CAPG/IL1R1/F3/ANGPT1/CAV1/C1QB/CD14/TCIRG1/MYO1F/PROC/UCP2/HPN/CD53/CD37/FES/ACTC1/NCKAP1L/MAG/LILRB4/RNASE6/GPSM3/EPHA1/PLCG2/A2M/GYPC/PGM5/VCAM1/ERBB2/CXCL12/MAPK4/TXLNA/CD27/RLBP1/KRT5/IRAG2/GJA1/POU2F2/LIMS1/PEPD/INHBB/SPTLC2/KCNJ8/HPX/PIP4K2A/NKX3-1
RAPA_EARLY_UP.V1_UP	RAPA_EARLY_UP.V1_UP	120	0.464854	1.37786	0.0274669	0.0376919	0.00886371	3533	tags=28%, list=16%, signal=24%	HOXD10/PLA2G5/VGF/HLA-DRB6/KIAA0040/AEBP1/FOXJ1/COL5A2/HSPB6/ADGRE5/CES1/GNG12/ITGA5/FABP7/IRF7/OLFML2A/PTGIR/KRT14/TRIM38/CEBPA/TNFAIP2/MYRF/VSIG4/KLK6/LST1/ANPEP/GRPR/ESRRB/CDH4/COL6A1/CTSD/HPGD/ARHGEF15/NUCB1
BCAT_BILD_ET_AL_UP	BCAT_BILD_ET_AL_UP	41	0.556919	1.4966	0.0284414	0.0387463	0.00911166	3588	tags=39%, list=16%, signal=33%	CASP4/CAPS/ST6GALNAC2/RPS6KA1/CD151/MYL9/STXBP2/PALMD/TAGLN/DTX2/CTSD/WIPI1/MYADM/ACTN4/B4GALT1/CAMKMT
IL21_UP.V1_DN	IL21_UP.V1_DN	114	0.465441	1.37685	0.0296524	0.0401053	0.00943127	2926	tags=25%, list=13%, signal=21%	HOXB8/MEOX2/IGLV2-14/TREM1/RHOD/GPC3/MAB21L1/KLHDC8A/LCN2/RAMP3/CLEC7A/SCN7A/WNT4/ITGA2/PLEK/ADTRP/PDE1C/CD72/FES/CNTN2/MYLK/PDE6B/ADAM28/ECHDC3/CLDN10/TLR5/FAM124B/ADGRL4
CAMP_UP.V1_UP	CAMP_UP.V1_UP	183	0.432601	1.30761	0.031031	0.0416702	0.00979927	5166	tags=25%, list=23%, signal=19%	COL6A3/CCL5/TYMP/KIAA0040/HLA-DRB5/CD74/NUAK2/TFPI2/PLSCR1/APOBEC3C/IFITM3/TGFBI/CXCL8/UPP1/CYBA/TRIM38/ZDHHC23/IFITM1/GLRX/ELN/SELENBP1/GPR160/WIPI1/PPP1R15A/SIL1/PDIA3/HSPA5/HMGB2/MARS1/LRR1/ZNF367/TMED9/NLRP1/IFIT2/MT2A/LIMS1/P4HB/FOS/SEC61A1/CHAF1A/SSR3/MAGOH/PPIB/CEBPG/SESN2/HSP90B1
E2F1_UP.V1_UP	E2F1_UP.V1_UP	160	0.440496	1.31994	0.0352823	0.047043	0.0110627	6327	tags=35%, list=28%, signal=25%	DRC1/SOCS2/VEGFA/E2F8/DLGAP5/CYBA/SPEF1/TK1/BOK/TYMS/ART3/VPREB3/CHAF1B/CRYZ/BRCA2/BUB1/CASP7/TOP2A/PBX3/SGO1/RELL1/EFNB2/AURKB/DMBT1/PIM1/STIL/PPM1M/CHEK1/NCAPH/PLK4/KIFC1/LMNB1/DLX1/CDR2L/TLE4/ARHGEF1/HES1/WDHD1/UBE2T/BOLA3/TPM2/MELTF/GRWD1/PIP4K2A/POLA2/RB1/SLC20A1/PTPN21/MAP3K11/MCM10/KLHL21/EZH2/ERMP1/PTPRU/DNAJC21/MCM4
TBK1.DN.48HRS_DN	TBK1.DN.48HRS_DN	45	0.538157	1.45823	0.0373303	0.0494232	0.0116225	4376	tags=31%, list=20%, signal=25%	COL4A1/PDGFA/BIRC5/IER3/IL13RA1/EGF/CRYZ/PSMB8/GNA15/CDK1/TRIB3/DUSP4/XBP1/HSPA1A
NRL_DN.V1_DN	NRL_DN.V1_DN	106	0.458907	1.35589	0.0409417	0.0538254	0.0126577	5472	tags=46%, list=25%, signal=35%	MOXD1/SOCS3/CLIC1/EN2/BST2/CCL2/TC2N/SLC7A3/FKBP9/FABP7/PARVG/PDE1C/ARHGDIB/ABCB4/ELK3/PIK3AP1/ECE1/CTBS/CASP7/ELOVL2/CLIC4/DYSF/PECAM1/MFNG/TMEM158/PTPN13/ORAI1/ERMAP/RNF149/PRDM1/PDIA3/JAM3/BAX/TMED9/RIOX2/ADGRA2/NFKB1/ATP2A1/RAB8A/CRYBG3/LMNB2/SWSAP1/PNP/LAMTOR2/SMPDL3A/TRAPPC3/ARPC3/SLC25A13/GZMM
RB_P130_DN.V1_DN	RB_P130_DN.V1_DN	116	0.453467	1.34125	0.0418795	0.054676	0.0128577	4635	tags=30%, list=21%, signal=24%	SLC10A6/VDR/PLBD1/GJB2/CTSC/GADD45A/HLA-G/PARP9/OLR1/NEAT1/CASP6/VOPP1/STAT1/B2M/CTSK/KLK6/CLU/RNASET2/HK2/ARRDC4/TMEM140/KIF16B/CTSB/GNS/EOGT/STAT6/CXCL12/DSP/RRAS/HSPA1B/USP18/DNAJC1/LAMP2/LAMP1/ERAP1
JNK_DN.V1_DN	JNK_DN.V1_DN	145	0.435802	1.30383	0.0424671	0.0550608	0.0129482	4543	tags=35%, list=20%, signal=28%	KRT75/ABCA4/G0S2/IL2RB/SERPING1/TYMP/RGS16/SPRY1/COL13A1/APOBEC3F/SOX10/DEPP1/STEAP1/ITGB2/NR2E1/TSPAN2/ATP2A3/GCNT1/MMP2/SLC49A3/DYRK3/CDC45/MYL9/OR7A5/ZIC2/BTK/LY86/ARHGAP4/SIPA1/SEMA3B/CDKN3/IRF8/VASP/UBE2C/SERPINF2/VEGFC/ACVRL1/GJA4/PLK1/DUSP4/PDGFB/AR/MAFK/PTPN18/NPR1/WIPF1/KNTC1/ITGA10/SVEP1/POLD1/PTP4A3
BRCA1_DN.V1_UP	BRCA1_DN.V1_UP	82	0.474111	1.36925	0.0469239	0.0604225	0.0142091	3569	tags=34%, list=16%, signal=29%	TRPM8/FCGR2C/HOXB7/CD3D/FCGBP/OSR2/TNC/RHOH/CTLA4/CLEC7A/ARHGAP15/H3C6/SLC16A4/LGALS9/VAV1/TRGV7/TENT5C/CRYGD/ETNK2/SGCA/DENND1C/H2BC11/HAAO/GJA5/ISYNA1/RCN3/CD34/RNF122
PDGF_ERK_DN.V1_UP	PDGF_ERK_DN.V1_UP	120	0.446712	1.32409	0.0508647	0.0650515	0.0152977	4028	tags=26%, list=18%, signal=21%	SERPINB2/COL1A1/PAX2/PHLDA2/GALNT3/PPIC/ACP5/CLEC2B/SWAP70/NCKAP1L/GAP43/MYO1E/IL12RB1/PMP22/RRBP1/GLRX/MAML3/CHEK2/CDK6/TRAF5/REST/ACOT11/AQP3/NTNG1/TP53I3/FLI1/ST6GAL1/HEBP2/PDIA3/C22orf31/PSMB10
SIRNA_EIF4GI_UP	SIRNA_EIF4GI_UP	86	0.468903	1.36129	0.0550936	0.0699837	0.0164575	3664	tags=19%, list=16%, signal=16%	SAA1/PYGL/HSPB1/CTSC/CA2/HLA-B/ATF3/INPP5D/CEBPD/LAP3/NQO1/ZFP36L2/S100A14/PTPN13/FCAR/ESYT1
KRAS.PROSTATE_UP.V1_UP	KRAS.PROSTATE_UP.V1_UP	92	0.462152	1.34372	0.0574113	0.0724384	0.0170348	3312	tags=30%, list=15%, signal=26%	RARRES2/BANK1/IL7R/PTPN7/LAIR2/CFH/MMP11/ADM2/OPLAH/TWIST1/APOBEC3G/HABP2/ITGB2/ITGA2/LILRA6/ANGPTL4/CD79A/LAPTM5/IL10RA/ENG/PLLP/CDH4/MAP4K1/PIGR/TGFBR1/VEGFC/MLXIPL/MAP3K1
MTOR_UP.N4.V1_UP	MTOR_UP.N4.V1_UP	172	0.421347	1.26931	0.0613682	0.0769148	0.0180875	5085	tags=31%, list=23%, signal=24%	ITK/GPR65/NIBAN1/ULBP1/IL7R/BATF/BCAT1/CD79B/VEGFA/CYTL1/SQOR/DOK2/MFAP4/ADM/GCH1/FAS/OGN/DDIT3/ATF3/APOL6/SEC24D/SLC1A5/IL21R/FGF1/CLIC4/FAH/PECAM1/CEBPB/PIR/PCK2/SPRED2/BHLHE40/ADAM9/TRIB3/TRPM6/CHAC1/SLC6A9/UGCG/SLC6A6/GPRC5C/MARS1/SDF2L1/NFIL3/TM6SF1/LGMN/PSPH/MIPEP/SLC39A4/COQ2/OPN3/CEBPG/VLDLR/MGAT4A
CSR_LATE_UP.V1_DN	CSR_LATE_UP.V1_DN	131	0.43302	1.2896	0.0649746	0.0803633	0.0188984	3862	tags=32%, list=17%, signal=27%	SOD2/DPP4/XAF1/CFH/COL8A2/EPSTI1/CCL2/MRGPRF/PAMR1/OLFML2A/PLEKHG4/TRIM22/ACCS/VAMP5/DDX60L/SLC22A18/PYROXD2/CHST2/TMEM119/HHEX/PLAAT4/GSN/GYPC/GLI3/DENND2A/IL1B/DKK2/ABCA6/APOL3/IGDCC4/GAS1/MOB3C/SUMF1/QPRT/ACVRL1/GAS6/DDB2/KLHL29/ITGB8/RNLS/FTH1/TNXB
TBK1.DF_DN	TBK1.DF_DN	259	0.399069	1.21322	0.0649351	0.0803633	0.0188984	6252	tags=29%, list=28%, signal=21%	HOXA1/IGF2BP3/DKK1/ALDH3A1/COL4A1/GALNT3/COL5A2/THBS1/P3H2/PDGFA/IL1RN/ITGA2/ANGPTL4/PSMB9/CASP6/KIF14/SPRY2/PPCS/PSMB8/SLC26A2/CDK6/DDX60/MBP/SLC39A8/GALNT7/H1-2/MIS18BP1/OSBPL3/EHF/GAS1/COL4A5/LMNB1/CDR2/RAI14/TMOD3/CDCA4/PTGES/SEMA3C/RIOX2/SHTN1/GJA1/CD2AP/SNTB2/SRPRA/LIMS1/FOS/DSN1/TLN1/ERAP1/SMC5/DNAJC3/PMEPA1/SEPHS2/IRF2/ZWINT/FNBP1L/SOWAHC/ELL2/ODF2/SLC25A13/GNAI3/PCBD1/KLF5/CXADR/RBBP5/CB…
KRAS.DF.V1_DN	KRAS.DF.V1_DN	137	0.424542	1.26776	0.0678825	0.0834111	0.0196152	5684	tags=40%, list=26%, signal=30%	HOXC8/IGFBP2/CD2/PAPPA2/HSPB6/PDGFA/LAMP3/TNC/LRRC61/IGFBP3/ALOX5/HOXA11/THNSL2/AHR/MYO5C/GLIPR1/CYTH4/CLDN1/PYY2/LCP1/GAP43/CDK18/MMP25/COPZ2/WNT6/TAGLN/MXRA8/BCAM/STX3/ALOX12P2/COL4A5/RNF122/TGFB3/TNXB/COBL/PTPN14/SEMA3C/PTGER1/PSPH/SMAD6/MEX3D/MAP7/HPX/PXDC1/ACTL6A/RNF43/HUS1/TMEM168/SLC25A13/TMEM45A/KLF11/CXADR/TUFT1/NRP2/HRH2
CAHOY_OLIGODENDROCUTIC	CAHOY_OLIGODENDROCUTIC	84	0.45707	1.32593	0.0788382	0.096244	0.022633	4924	tags=42%, list=22%, signal=33%	FSTL1/FBP1/SOX10/NCMAP/AHR/TSPAN2/PSTPIP2/MYRF/NINJ2/P4HA2/PLLP/GAB3/NRP1/BCAS1/ADGRL2/LRRC75A/NRM/ATP10B/ZNF536/LHFPL6/RNF122/DMRTA1/MAP6D1/CDR2L/ERBB3/EVI2A/WIPF1/MAP3K15/DOCK7/CCN2/FAM89A/DUSP15/CPOX/IFFO1/POP4
RAPA_EARLY_UP.V1_DN	RAPA_EARLY_UP.V1_DN	146	0.417152	1.24565	0.0820669	0.0995392	0.0234079	4526	tags=30%, list=20%, signal=24%	PAX2/ROR2/ADGRE1/MET/PDZK1IP1/SOX10/NCF1/IGFBP3/PTGS1/PNPLA4/LGALS3BP/TRIM22/SLC49A3/LTB/ENG/IL12RB1/AOC3/TROAP/ITPKC/RBMS1P1/MGST2/HLA-E/LMNA/MOG/PLXND1/HAAO/ARHGAP4/COL9A2/GRN/NCAPH/EPHB4/IFI27/KCNQ1/GFRA2/LHB/MEP1A/GNRH2/PLEKHO2/SELPLG/GDPD5/TSPAN4/HSPA1A/FXYD1/COBLL1
PRC2_SUZ12_UP.V1_DN	PRC2_SUZ12_UP.V1_DN	127	0.427471	1.26935	0.084264	0.101549	0.0238805	4757	tags=34%, list=21%, signal=27%	MAP1LC3C/HOXA10/ALDH3A1/HLA-DQA1/TRAC/FOXJ1/IL1RN/LRRC61/CLEC10A/ADAMTS7/ACP5/ARSD/ATP2A3/CD247/TFEC/CD22/GNGT2/IL10RA/STXBP2/NPY2R/HAPLN2/CORO1A/ARHGEF16/GNA15/ORC1/CHEK1/CCL19/RAD54L/HS2ST1/ACVRL1/FRMD8/SLC6A6/C22orf31/PF4/SLC35D1/CD1D/COQ8B/EPHX2/ZWILCH/FXYD1/ST3GAL1/HAUS5/LMNB2
IL2_UP.V1_DN	IL2_UP.V1_DN	141	0.418415	1.2484	0.0850202	0.101808	0.0239413	4235	tags=33%, list=19%, signal=27%	HOXA5/JCHAIN/SLN/NKX3-2/MMP7/RNASE2/GDF5/KLHDC8A/ACP3/FCGR2A/ARL4C/FZD2/CLEC2B/PROM1/PLEK/UNC93B1/IL18/PDE1C/CD72/CCDC81/AGBL2/SLA/TNFAIP2/MYLK/RASGRP3/PDE6B/POU2AF1/H2AJ/DLEC1/MTARC2/H2AC11/EFNA4/CXCR2/TMEM140/FAM124B/SNAI2/PCSK5/CD34/ABCD2/BTN3A1/RABEP2/BTN3A3/EVI2A/NACAD/PBXIP1/CCNP
ALK_DN.V1_DN	ALK_DN.V1_DN	93	0.448987	1.30649	0.085595	0.101847	0.0239506	3414	tags=34%, list=15%, signal=29%	DPEP1/CNMD/PSORS1C1/COL9A3/MX1/OAS1/IFI6/KCNN4/CTF1/FGL2/SEMA3E/DOK3/LILRA6/UNC93B1/CD300C/IFI44L/CCDC81/VAV1/NAT2/INPP5D/SLA/RTP4/IGFBP6/PRODH/SERPINF2/FZD8/TTC38/ADORA3/AQP3/ITIH2/IFI27/BCO1
BRCA1_DN.V1_DN	BRCA1_DN.V1_DN	99	0.442526	1.29406	0.0891192	0.105374	0.0247799	4702	tags=32%, list=21%, signal=26%	MEOX2/ZMYND10/FOXJ1/GPR157/RSAD2/MX2/SNAI1/GDF5/CTSW/PLBD1/GSDMD/CD79A/HTATIP2/OLFML2B/PDLIM3/FCER1A/IFI35/LRRC17/LYL1/CYSLTR1/AURKC/CYSLTR2/BRCA1/CA14/VAMP3/H4C5/GNRH2/SCARF1/ASPA/ICMT/E2F2/SMO
NRL_DN.V1_UP	NRL_DN.V1_UP	115	0.42759	1.26483	0.0980592	0.11522	0.0270953	4336	tags=30%, list=20%, signal=25%	PDE6A/CCN4/TFF3/AQP1/PCOLCE/KCNN4/PLA2R1/CLDN23/GADD45A/SHISA2/IGFBP5/PLPP2/BST1/LRRC2/BCL3/PDIA5/TNFAIP2/CCNA2/PDE6B/LLGL2/TNFAIP3/IRF6/ESRRB/CALU/GALNT7/ZFP36L2/NUF2/PROSER2/B4GALT1/CDR2/MLF1/LMO1/GALNT10/SNTB2/MKNK1
KRAS.50_UP.V1_UP	KRAS.50_UP.V1_UP	40	0.498027	1.33586	0.10333	0.120658	0.0283742	2585	tags=32%, list=12%, signal=29%	IL13RA2/G0S2/STC1/MMP11/ITGB2/ITGA2/LILRA6/HPN/ANGPTL4/HSD11B1/A2M/GLRX/PPBP
GCNP_SHH_UP_EARLY.V1_UP	GCNP_SHH_UP_EARLY.V1_UP	142	0.411044	1.22768	0.104146	0.12086	0.0284218	5127	tags=27%, list=23%, signal=21%	FOSL1/SOX10/LOXL2/E2F8/ADAMTS1/RPL39L/HLA-H/KIF4A/NABP1/TYMS/STAT5A/CD276/IRF6/IRF5/PLCG2/SHC1/AURKA/TOP2A/SGO1/ELOVL2/AURKB/MYB/CHEK1/FCGRT/RHPN2/KIFC1/CD55/MCM5/SLC27A1/ARHGEF1/ANLN/MAN1A1/UBE2T/FNTB/DNAJC3/CKS2/SNAPC2/HMGCL/POLA2
DCA_UP.V1_DN	DCA_UP.V1_DN	145	0.405335	1.21268	0.110212	0.127116	0.0298929	3967	tags=22%, list=18%, signal=18%	SHOX2/PDE6A/PRRX2/COL21A1/ADM2/CST7/GSDMD/SP140L/SIRPB1/STEAP1B/TCIRG1/ARHGAP15/GMPR/ASPM/MATN4/MAP3K20/PLK3/INSL5/IL10RA/RAB11FIP1/CHST2/ABCA5/CHEK2/NFASC/FGR/S100A14/TXLNA/TRPM6/SHMT1/SLC6A6/KRT5/MAP3K14
SRC_UP.V1_UP	SRC_UP.V1_UP	124	0.406398	1.20566	0.153455	0.175912	0.0413679	5008	tags=37%, list=23%, signal=29%	CFAP45/CD70/ETV7/SOCS1/LAMP3/CAPS/DNAJC22/GPR55/LAMC3/MORN3/LGI4/KCNQ1DN/TMEM255B/PSG8-AS1/FES/ANGPTL6/VWA3B/FBLN2/PPP1R3B/PIK3R5/SH3BGR/PLAAT4/RNASE1/PACSIN3/IRF8/DTX2/NAALADL1/STAC3/MLXIPL/TMEM106C/PI16/COX4I2/CCDC65/DLGAP1-AS2/GINS2/CHCHD10/CFAP46/WTIP/BMF/FOS/SMO/LEKR1/SVBP/HPX/TMUB1/GRWD1
SINGH_KRAS_DEPENDENCY_SIGNATURE	SINGH_KRAS_DEPENDENCY_SIGNATURE	11	0.624874	1.3017	0.162482	0.18513	0.0435357	2968	tags=45%, list=13%, signal=39%	C6orf141/AREG/DAPP1/AMPD3/CLDN7
CAHOY_ASTROCYTIC	CAHOY_ASTROCYTIC	80	0.427745	1.22941	0.163522	0.185194	0.0435506	3985	tags=28%, list=18%, signal=23%	FAM20A/BCAT1/SLC7A10/VEGFA/RARRES1/VNN1/SEMA3E/AQP9/LGI4/CYP4F11/HSD11B1/IMPA2/TNFRSF19/FGFR3/ELOVL2/TTYH3/TMEM51/KCTD14/NIPAL3/ABCD2/EGFL6/SLC27A1
TBK1.DN.48HRS_UP	TBK1.DN.48HRS_UP	46	0.457587	1.24429	0.167232	0.188261	0.0442718	5848	tags=37%, list=26%, signal=27%	PSRC1/IGFBP3/ARL4C/CEBPA/MYLK/CDK4/CHEK2/PIK3C2B/MYCBP/CDKN2A/BAMBI/MLEC/MTFR1/SCP2/CNDP2/FKBP14/FCHO1
KRAS.AMP.LUNG_UP.V1_UP	KRAS.AMP.LUNG_UP.V1_UP	84	0.42194	1.22402	0.171162	0.191538	0.0450426	3235	tags=25%, list=15%, signal=21%	PLEKHS1/CLEC5A/F13A1/CD3E/SPP1/JAK3/MAN1C1/VENTX/FCER1G/SEMA3E/CD247/GNGT2/FCER1A/LY75/EGF/C3AR1/XPNPEP2/REST/CEBPE/ASIP/MAGEA12
EIF4E_UP	EIF4E_UP	83	0.418664	1.21269	0.17898	0.197931	0.0465459	4918	tags=30%, list=22%, signal=24%	FOXD2/METTL1/LAMC3/FABP7/IL18/RGS3/MAP2K3/CKMT2/RIPOR3/PPCS/HAUS7/LST1/ATP8B3/OSBPL10/BHLHE40/NKX2-8/FBXL13/TMEM230/SLC25A30/FBXO4/TP53I11/PMM2/NDRG1/FAM117A/PHYKPL
RB_DN.V1_UP	RB_DN.V1_UP	101	0.408193	1.19918	0.177984	0.197931	0.0465459	7400	tags=47%, list=33%, signal=31%	DDIT4L/ADGRE1/FBP1/ALPK3/RRM2/SLC7A7/SLC2A9/GAB3/PALMD/GCLM/PPM1M/RAD54L/TNFRSF18/MDM2/IER2/POLE2/TMEM54/TIMELESS/PCNA/HES1/PLXNB2/UBE2T/DNASE1L1/POLD4/ST3GAL4/NUMBL/TNFSF9/MCM6/MANSC1/SLC24A1/HAT1/DUOXA1/NXT1/ARTN/CCNE1/ZSCAN22/CTDSP1/BBC3/CLN6/TPRA1/DNMT1/TUBG1/RFC3/SLC2A8/SMARCA1/RPA1/TIPIN
KRAS.BREAST_UP.V1_DN	KRAS.BREAST_UP.V1_DN	98	0.404252	1.1822	0.201036	0.221022	0.0519761	4318	tags=33%, list=19%, signal=26%	HOXB5/SERPING1/COL5A2/DENND2D/PLBD1/RAMP3/LAIR1/SCN7A/PI15/MYL9/CRYGD/PDE6B/TLR6/CDK18/P2RX1/FGFR3/NDNF/MAML3/SELENBP1/FGR/DTX2/NAALADL1/APOL3/DPEP2/CYP21A2/CA5B/GJA4/C22orf31/KIF25/NPR1/EPHX2/SYNDIG1
CSR_EARLY_UP.V1_DN	CSR_EARLY_UP.V1_DN	116	0.393673	1.16439	0.205312	0.22441	0.0527729	4912	tags=22%, list=22%, signal=18%	COL1A1/HOXA10/GDF5/XAF1/HSPG2/MAB21L1/WEE1/ADAMTSL4/FZD2/ADM/SULF1/ACCS/TENT5C/NDNF/TRIM56/SIX5/ERAP2/HEBP2/STAT2/LRRK2/IFIT2/ASPA/CC2D1A/PDE5A/LRIG3/SKP2
GLI1_UP.V1_DN	GLI1_UP.V1_DN	16	0.541683	1.21786	0.226667	0.24632	0.0579252	5554	tags=56%, list=25%, signal=42%	RUNX1/FOLR1/BTBD16/YIPF1/ESYT1/SEPTIN9/CD2AP/OPN3/SLC22A1
YAP1_UP	YAP1_UP	37	0.452498	1.19905	0.245634	0.265398	0.0624117	5513	tags=41%, list=25%, signal=31%	CCDC8/MSN/SAMSN1/MYLK/RFTN1/C8orf48/DDB2/RHOQ/CNP/SEMA3C/RPN2/SNAP23/NMRK1/DRAM2/FLOT1
PDGF_ERK_DN.V1_DN	PDGF_ERK_DN.V1_DN	126	0.379742	1.12698	0.253049	0.271847	0.0639281	4366	tags=25%, list=20%, signal=21%	IL7R/IL2RG/MAB21L1/FZD2/TGIF1/ADM/PNMT/TNFSF8/DUSP6/LTBP1/LY86/SPRY2/FAM50B/JUNB/DTX2/EFNB2/CEBPB/ARHGEF16/ZFP36L2/MAFF/JUN/TRIB1/DUSP1/CDR2L/DNAJB1/ERF/EGR1/FADD/NFIL3/KLF10/TMED5/SULT1A1
CRX_NRL_DN.V1_DN	CRX_NRL_DN.V1_DN	109	0.37999	1.12279	0.262076	0.279945	0.0658325	5407	tags=40%, list=24%, signal=31%	TNFRSF12A/MYBPH/TNC/CITED1/SDC4/SPINT1/FABP7/GGACT/PYGM/ECE1/CTBS/FZD5/RBP7/ELOVL2/CLIC4/MFNG/HEBP1/TMEM158/PTPN13/ERMAP/SLC26A4/RREB1/RNF149/PRDM1/PDIA3/JAM3/BAX/EGR1/RIOX2/ADGRA2/NFKB1/CAP1/INHBB/CRYBG3/SWSAP1/PNP/SVBP/BAMBI/SMPDL3A/HS3ST1/TRAPPC3/PAM/ARPC3/SLC25A13
PDGF_UP.V1_UP	PDGF_UP.V1_UP	132	0.371548	1.10744	0.285279	0.301309	0.0708566	5847	tags=34%, list=26%, signal=25%	FOSL1/TFPI2/AREG/CITED1/GADD45A/DUSP5/ATF3/NCKAP1L/CDC6/P2RX1/CDK6/HSPA2/SLCO3A1/TRAF5/ELOVL2/ARC/TMEM158/ACOT11/ARHGEF15/ADAM9/RNF19B/SEPTIN10/GNG11/EGR1/NAB2/KLF10/TGIF2/CLDND1/FOS/MOB1A/CDKN1A/CBX2/PFKFB3/ARR3/SIK1/TAF12/SLC5A3/STK10/SLC20A1/NAGLU/SNRNP40/SDC3/DEGS1/SLC39A7/UAP1
MTOR_UP.N4.V1_DN	MTOR_UP.N4.V1_DN	156	0.366302	1.09926	0.285282	0.301309	0.0708566	4282	tags=21%, list=19%, signal=17%	HOXA7/FOLR1/SPRY1/CD52/VNN2/FBLN5/ECHDC2/ST8SIA4/NEAT1/EVI2B/GALNT6/H3C10/ANXA5/LTB/KCNJ5/NFE2/H2BC12/BRIP1/BIN2/ST18/GALNT7/CEP135/MIS18BP1/EOGT/H2AC6/CHIC2/TFPI/GIMAP6/EVI2A/POLR2J4/PBXIP1/SLC35D1/HES1
GLI1_UP.V1_UP	GLI1_UP.V1_UP	23	0.467315	1.14838	0.302005	0.31719	0.0745911	4828	tags=26%, list=22%, signal=20%	JCHAIN/WEE1/IGFBP6/TMOD3/NPHP1/TXNDC12
BCAT_BILD_ET_AL_DN	BCAT_BILD_ET_AL_DN	43	0.412603	1.11407	0.329186	0.343816	0.0808526	5364	tags=33%, list=24%, signal=25%	IL1RAP/IL1A/TNFAIP3/PLAGL1/SHC1/IRAK2/ARHGAP29/PTHLH/GCLM/OSBPL10/IER5/RAP1A/ATP10D/FRYL
JAK2_DN.V1_UP	JAK2_DN.V1_UP	104	0.368765	1.08677	0.335041	0.347998	0.0818361	4061	tags=29%, list=18%, signal=24%	CCL21/COL6A3/CCR2/TYMP/CSTA/GZMH/TNFRSF10C/PIPOX/SPN/CYP1B1/SLC28A1/ACTA2/MATN4/HOXD1/ABCB4/ASGR2/FGF20/FOXD1/EPHA3/CPED1/ATP8B3/RAB17/CLDN7/CDH11/CCIN/COL4A6/NEK11/PTN/CDH5/GPR37L1
KRAS.300_UP.V1_UP	KRAS.300_UP.V1_UP	109	0.366633	1.08332	0.338129	0.349277	0.0821367	3975	tags=32%, list=18%, signal=26%	IL13RA2/G0S2/STC1/PTX3/ITGBL1/SPP1/MMP11/APOBEC3G/SEMA3A/ADAM19/ITGB2/ITGA2/LILRA6/HPN/ANGPTL4/RDH5/DUSP6/HSD11B1/APOD/SPRY2/A2M/RNASE1/GLRX/ANPEP/CLUL1/PPBP/MAP4K1/ANO1/GPR4/TFPI/DCBLD2/RREB1/ETV4/EVI2A/NME5
E2F3_UP.V1_UP	E2F3_UP.V1_UP	158	0.355904	1.0667	0.363269	0.373195	0.0877614	4752	tags=34%, list=21%, signal=27%	HOXA9/E2F7/MBOAT1/CMPK2/GCH1/LMO2/TIFA/MICB/ZDHHC12/CDKN2C/SLC27A3/CEBPA/KISS1R/ZDHHC23/ZIC2/CHST2/SH3BGR/FGFR3/FOXD1/SNX10/PLXND1/HSPA2/SIX5/GPR160/ABHD15/SYNM/LEF1/MYB/DTL/TMEM158/HPGD/TP53I13/TMEM106C/EGR2/FAM43B/FAM78A/ALKAL2/POLE2/MAP6D1/PCNA/ZNF367/CD83/PCOLCE2/TM6SF1/GINS1/TLCD1/DHRS13/SLC4A3/INHBB/CDKN1C/CBX2/SMCO4/SMAD6
CAMP_UP.V1_DN	CAMP_UP.V1_DN	181	0.343578	1.03805	0.41984	0.428967	0.100877	4439	tags=24%, list=20%, signal=20%	SERPINB2/ANXA1/SEL1L3/IL7R/MIR155HG/FSTL1/MS4A6A/GNG12/KCNN4/TMBIM1/PTPRC/MYO5B/PLEK/BIRC3/IGFBP5/NFATC2/FAR2P2/TMSB4X/NCF2/RRAD/ZFP36/CDCA7L/CHST2/MPZL3/PLS3/CASP7/IL4R/TTYH3/RGS18/RGS1/PALLD/DEDD2/AKAP12/GEM/ESYT1/RREB1/PRDM1/CD83/MYO15B/CAMK2D/NFKB1/HSPA1A/FUT8/SVEP1
NOTCH_DN.V1_UP	NOTCH_DN.V1_UP	135	0.338272	1.00862	0.480691	0.488486	0.114874	4001	tags=25%, list=18%, signal=21%	ESM1/COL4A1/KRT18/S100A8/KCNN4/HMOX1/FKBP9/CTF1/ADAMTS1/PROC/SSH3/SLC17A9/FYB1/RUNX2/RDH5/TNFSF8/RRAD/KLHL26/ITPKC/TGFB1I1/ASB9/CPA2/CLMN/TGFBR1/SLC5A4/MAP3K1/CA5B/P2RY1/GNG11/STAT2/GSN-AS1/MEFV/NME5/KIF13B
MYC_UP.V1_UP	MYC_UP.V1_UP	146	0.32373	0.966686	0.5846	0.590886	0.138954	5540	tags=22%, list=25%, signal=17%	HP/SIX3/ADGRE2/DENND2D/CAPS/HS3ST3A1/METTL1/LRRC61/S100A10/VWA3B/CDCA7L/MMP25/PLA2G4A/DPYSL5/CAMKMT/LYPD6/HSPA6/CHCHD10/PCOLCE2/FAM86C1P/FOS/OAF/MTFP1/P3H4/PMM2/ALG3/EEF1AKMT1/PRR7/ANO2/TMEM201/C19orf48/ISOC2
JAK2_DN.V1_DN	JAK2_DN.V1_DN	110	0.314025	0.92649	0.645062	0.648511	0.152505	1583	tags=9%, list=7%, signal=8%	HOXA7/ITGBL1/ECM2/GRIK1/DAPP1/ADAMTSL4/GABRE/NEAT1/MTMR11/SLC27A3
YAP1_DN	YAP1_DN	36	0.315719	0.835496	0.705951	0.705951	0.166013	5501	tags=36%, list=25%, signal=27%	ITGBL1/ITGA2/MYO1B/IL4R/GOLGA2P5/MOBP/LCA5L/SLC9A1/DOCK11/ACOX2/LIMD1/LINC00639/RFX1
